# Supplementary material for: C–C bond migration in the cycloisomerization of oxygen-tethered 1,6-enynes
Source: Royal Society of Chemistry journal article supplement (doi:10.1039/c3cc47499b), 2013-11-27

## Supporting Information

### **C-C Bond Migration in the Cycloisomerization of Oxygen-Tethered 1,6-Enynes**

Susan M. Stevenson, Eric T. Newcomb, and Eric M. Ferreira\*

*Department of Chemistry, Colorado State University, Fort Collins, CO 80523*

[emferr@mail.colostate.edu](mailto:emferr@mail.colostate.edu)

## Table of Contents

|                                              |     |
|----------------------------------------------|-----|
| <b>Materials and Methods</b> .....           | S3  |
| <b>Additional Iridium Optimization</b> ..... | S4  |
| <b>Enyne Cycloisomerizations</b> .....       | S5  |
| <b>Substrate Synthesis</b> .....             | S23 |
| <b>Additional Reactions</b> .....            | S37 |
| <b>Crystallographic Data</b> .....           | S40 |

**Materials and Methods:** Reactions were performed under an argon atmosphere unless otherwise noted. Tetrahydrofuran, toluene, and benzene were purified by passing through activated alumina columns. All other reagents were used as received unless otherwise noted. Commercially available chemicals were purchased from Alfa Aesar (Ward Hill, MA), Sigma-Aldrich (St. Louis, MO), Oakwood Products, (West Columbia, SC), Strem (Newburyport, MA) and TCI America (Portland, OR). Qualitative TLC analysis was performed on 250 mm thick, 60 Å, glass backed, F254 silica (Silicycle, Quebec City, Canada). Visualization was accomplished with UV light and exposure to *p*-anisaldehyde or ceric ammonium molybdate (CAM) solutions followed by heating. Flash chromatography was performed using Silicycle silica gel (230-400 mesh).  $^1\text{H}$  NMR spectra were acquired on a Varian 400 MR (at 400 MHz) and are reported relative to  $\text{SiMe}_4$  ( $\delta$  0.00).  $^{13}\text{C}$  NMR spectra were acquired on a Varian 400 MR (at 100 MHz) and are reported relative to  $\text{SiMe}_4$  ( $\delta$  0.0). All IR spectra were obtained on NaCl plates (film) with a Bruker Tensor 27. High resolution mass spectrometry data were acquired by the Colorado State University Central Instrument Facility on an Agilent 6210 TOF LC/MS.

## Additional Iridium Optimization

In our optimization of iridium conditions, we attempted the cycloisomerization with  $\text{Ir}_4(\text{CO})_{12}$ ,  $\text{Ir}(\text{CO})_2(\text{acac})$ , and  $[\text{Ir}(\text{dbcot})(\text{L})]^+\text{SbF}_6^-$ , as well as Vaska's complex ( $\text{IrCl}(\text{CO})(\text{PPh}_3)_2$ ), which Shibata and coworkers had achieved success with in the cycloisomerizations of heteroatom-tethered 1,6-enynes (Ref 10d), but none of these catalysts enabled full conversion, either under argon or CO, or when heated for several days (Table S1).

Table S1. Further iridium catalyst optimization.

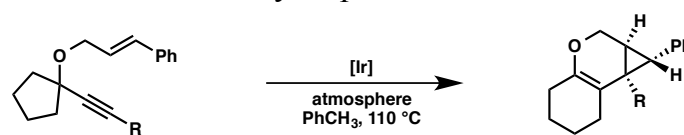

| Entry | R                       | Catalyst (mol %)                                            | Atmosphere  | Time (h) | Result    |
|-------|-------------------------|-------------------------------------------------------------|-------------|----------|-----------|
| 1     | <i>n</i> -Bu            | $\text{Ir}_4(\text{CO})_{12}$ (3)                           | CO, then Ar | 40       | 1:1 SM:P  |
| 2     | <i>n</i> -Bu            | $\text{Ir}(\text{CO})_2(\text{acac})$ (5)                   | CO, then Ar | 40       | 10:1 SM:P |
| 3     | <i>n</i> -Bu            | $[\text{Ir}(\text{dbcot})(\text{L})]^+\text{SbF}_6^-$ (2.5) | CO          | 16       | <5        |
| 4     | $\text{CH}_2\text{OBn}$ | $\text{IrCl}(\text{CO})(\text{PPh}_3)_2$ (10)               | Ar          | 16       | <5        |
| 5     | $\text{CH}_2\text{OBn}$ | $\text{IrCl}(\text{CO})(\text{PPh}_3)_2$ (5)                | CO          | 16       | <5        |



Iridium dimers  $[\text{Ir}(\text{dbcot})\text{Cl}]_2$ ,  $[\text{Ir}(\text{cod})\text{Cl}]_2$ , and  $[\text{Ir}(\text{coe})_2\text{Cl}]_2$ , however, all produced the desired cycloisomerization product, with  $[\text{Ir}(\text{dbcot})\text{Cl}]_2$  performing the best. A comparison of these three iridium dimers is shown in Table S2. An increase in yield was observed when the catalysts were first exposed to CO, but the reactions were run under Ar, versus when the reactions were run under an atmosphere of CO.

Table S2. Comparison of iridium dimers.

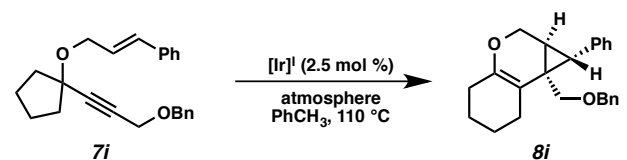

| Entry | $[\text{Ir}]^{\text{I}}$               | Yield (%)  |              |
|-------|----------------------------------------|------------|--------------|
|       |                                        | CO (1 atm) | CO, then Ar* |
| 1     | $[\text{Ir}(\text{dbcot})\text{Cl}]_2$ | 72         | 87           |
| 2     | $[\text{Ir}(\text{cod})\text{Cl}]_2$   | 63         | 81           |
| 3     | $[\text{Ir}(\text{coe})_2\text{Cl}]_2$ | 47         | 50           |

\*catalyst prepared under CO, but reaction run under Ar.



## Enyne Cycloisomerizations

**General Notes:** All solvents used were anhydrous and all reactions were performed in flame-dried glassware. Without the addition of triethylamine to the flash chromatography eluent, decreased yields were observed. In the cycloisomerizations run with  $[\text{Ir}(\text{dbcot})\text{Cl}]_2$ , dppp ((1,3-bis(diphenylphosphino)propane) was added in the work up to chelate the iridium. NMR spectra for the cycloisomerization products were taken in  $\text{d}_6$ -benzene, since the products were observed to decompose in  $\text{CDCl}_3$ .

**A. General procedure for the cycloisomerization of oxygen-tethered 1,6-enynes catalyzed by Zeise's dimer ( $[(\text{C}_2\text{H}_4)\text{PtCl}_2]_2$ ).** To a solution of the 1,6-enyne (1 equiv) in toluene (0.06 M) in a 2-dram vial under argon was quickly added Zeise's dimer (2.5 mol %). CO was bubbled through the solution using a balloon and needle outlet (ca. 30 s). The balloon and outlet were then removed and the solution was stirred at the described temperature until all of the starting material was consumed, as determined by TLC. The reaction was allowed to cool to ambient temperature and diluted with an approximately equal amount of hexanes. The mixture was stirred for 15 min, then passed through a small plug of  $\text{Al}_2\text{O}_3$  (hexanes  $\rightarrow$  1:1 hexanes/EtOAc eluent). The solvent was removed by rotary evaporation and the resulting residue was purified by flash chromatography.

**General procedure for the *scaled-up* cycloisomerization of oxygen-tethered 1,6-enynes catalyzed by Zeise's dimer ( $[(\text{C}_2\text{H}_4)\text{PtCl}_2]_2$ ).** To a solution of the 1,6-enyne (1 equiv) in toluene (0.15 M) in a 16 x 125 mm glass culture tube under argon was quickly added Zeise's dimer (2.5 mol %). CO was bubbled through the solution using a balloon and needle outlet (ca. 30 s). The balloon and outlet were then removed and the solution was stirred at the described temperature until all of the starting material was consumed, as determined by TLC. The reaction was allowed to cool to ambient temperature and the solvent was removed by rotary evaporation. The resulting residue was purified by flash chromatography.

**B. General procedure for the cycloisomerization of oxygen-tethered 1,6-enynes catalyzed by  $[\text{Ir}(\text{dbcot})\text{Cl}]_2$ .** To a solution of the 1,6-enyne (1 equiv) in toluene (0.06 M) in a 16 x 125 mm glass culture tube under argon was quickly added  $[\text{Ir}(\text{dbcot})\text{Cl}]_2$  (2.5 mol %). CO was bubbled through the solution using a balloon and needle outlet (ca. 30 s), during which time the solution turned a dark-blue/black color. The balloon was removed and argon was bubbled through the solution in the same manner. The septum was quickly replaced with a Teflon cap and the solution was stirred at 110 °C until all of the starting material was consumed, as determined by TLC. The reaction was allowed to cool to ambient temperature and diluted with an approximately equal amount of hexanes. 1,3-Bis(diphenylphosphino)propane (dppp) (0.25 equiv) was also added to the mixture. The mixture was stirred for 15 min, then passed through a

small plug of Al<sub>2</sub>O<sub>3</sub> (hexanes → 1:1 hexanes/EtOAc eluent). The solvent was removed by rotary evaporation and the resulting residue was purified by flash chromatography.

**C. General procedure for the cycloisomerization of oxygen-tethered 1,6-enynes catalyzed by PtCl<sub>2</sub>.** To a solution of the 1,6-enyne (1 equiv) in toluene (0.06 M) in a 2-dram vial under argon was quickly added PtCl<sub>2</sub> (7 mol %). CO was bubbled through the solution using a balloon and needle outlet (ca. 30 s). The balloon and outlet were then removed and the solution was stirred at the described temperature until all of the starting material was consumed, as determined by TLC. The reaction was allowed to cool to ambient temperature and diluted with an approximately equal amount of hexanes. The mixture was stirred for 15 min, then passed through a small plug of Al<sub>2</sub>O<sub>3</sub> (hexanes → 1:1 hexanes/EtOAc eluent). The solvent was removed by rotary evaporation and the resulting residue was purified by flash chromatography.

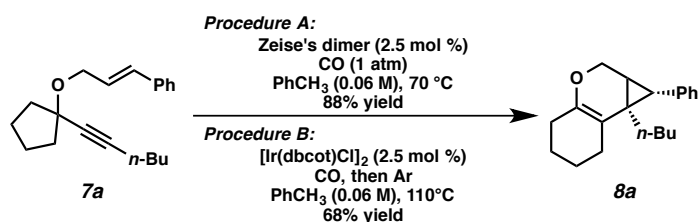

**Tricyclic 8a. Procedure A:** To a solution of enyne **7a** (16.0 mg, 56.7 μmol) in toluene (0.92 mL) in a 2-dram vial under argon was quickly added [(C<sub>2</sub>H<sub>4</sub>)PtCl<sub>2</sub>]<sub>2</sub> (0.9 mg, 1.53 μmol). CO was bubbled through the solution using a balloon and needle outlet (ca. 30 s). The balloon and outlet were then removed and the solution was stirred at 70 °C for 43 h. The reaction was allowed to cool to ambient temperature and was diluted with an approximately equal amount of hexanes. The mixture was stirred for 15 min, then passed through a small plug of Al<sub>2</sub>O<sub>3</sub> (hexanes → 1:1 hexanes/EtOAc eluent). The solvent was removed by rotary evaporation and the resulting residue was purified by flash chromatography (99:1 hexanes/CH<sub>2</sub>Cl<sub>2</sub> w/ 0.5% Et<sub>3</sub>N → 5:1 hexanes/CH<sub>2</sub>Cl<sub>2</sub> w/ 0.5% Et<sub>3</sub>N eluent) affording tricyclic **8a** (14.1 mg, 88% yield, R<sub>f</sub> = 0.70 in 2:1 CH<sub>2</sub>Cl<sub>2</sub>/hexanes, stained red with *p*-anisaldehyde) as a yellow oil.

**Procedure B:** To a solution of enyne **7a** (16.9 mg, 59.8 μmol) in toluene (0.92 mL) in a 16 x 125 mm glass culture tube under argon was quickly added [Ir(dbcot)Cl]<sub>2</sub> (1.3 mg, 1.53 μmol). CO was bubbled through the solution using a balloon and needle outlet (ca. 30 s), during which time the solution turned a dark-blue/black color. The balloon was removed and argon was bubbled through the solution in the same manner. The septum was quickly replaced with a Teflon cap and the solution was stirred at 110 °C for 15.5 h. The reaction was allowed to cool to ambient temperature and was diluted with an approximately equal amount of hexanes. 1,3-Bis(diphenylphosphino)propane (dppp) (6.2 mg, 15.0 μmol) was also added to the mixture. The mixture was stirred for 15 min, then passed through a small plug of Al<sub>2</sub>O<sub>3</sub> (hexanes → 1:1

hexanes/EtOAc eluent). The solvent was removed by rotary evaporation and the resulting residue was purified by flash chromatography (99:1 hexanes/CH<sub>2</sub>Cl<sub>2</sub> w/ 0.5% Et<sub>3</sub>N → 5:1 hexanes/CH<sub>2</sub>Cl<sub>2</sub>w/ 0.5% Et<sub>3</sub>N eluent) affording tricycle **8a** (11.5 mg, 68% yield) as a yellow oil.

**Tricycle 8a:** <sup>1</sup>H NMR (400 MHz; C<sub>6</sub>D<sub>6</sub>): δ 7.21-7.18 (m, 1H), 7.15 (d, *J* = 2.3 Hz, 1H), 7.09-7.04 (m, 3H), 4.08 (dd, *J* = 10.8, 4.5 Hz, 1H), 3.92 (dd, *J* = 10.9, 2.4 Hz, 1H), 2.29 (d, *J* = 5.5 Hz, 1H), 2.26-2.02 (m, 4H), 1.65-1.09 (m, 10H), 0.82 (d, *J* = 14.6 Hz, 3H), 0.62 (ddd, *J* = 14.0, 11.1, 5.7 Hz, 1H); <sup>13</sup>C NMR (100 MHz; C<sub>6</sub>D<sub>6</sub>): δ 147.8, 139.1, 129.4, 128.4, 126.2, 110.8, 64.5, 38.4, 30.2, 29.3, 28.1, 26.4, 25.6, 25.3, 23.8, 23.4, 23.3, 14.5; IR (film) 2929, 2858, 1673, 1447, 1145 cm<sup>-1</sup>; HRMS (ESI+) *m/z* calc'd for (M + H)<sup>+</sup> [C<sub>20</sub>H<sub>26</sub>O + H]<sup>+</sup>: 283.2056, found 283.2045.

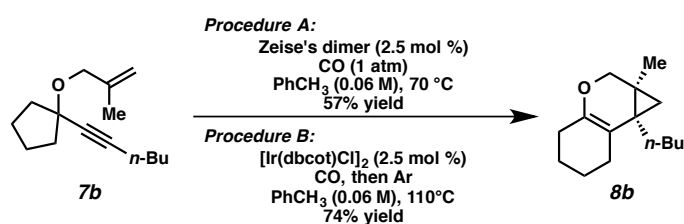

**Tricycle 8b. Procedure A:** To a solution of enyne **7b** (31.5 mg, 0.143 mmol) in toluene (2.5 mL) in a 2-dram vial under argon was quickly added [(C<sub>2</sub>H<sub>4</sub>)PtCl<sub>2</sub>]<sub>2</sub> (2.2 mg, 3.74 μmol). CO was bubbled through the solution using a balloon and needle outlet (ca. 30 s). The balloon and outlet were then removed and the solution was stirred at 70 °C for 19 h. The reaction was allowed to cool to ambient temperature and was diluted with an approximately equal amount of hexanes. The mixture was stirred for 15 min, then passed through a small plug of Al<sub>2</sub>O<sub>3</sub> (hexanes → 1:1 hexanes/EtOAc eluent). The solvent was removed by rotary evaporation and the resulting residue was purified by flash chromatography (hexanes w/ 0.5% Et<sub>3</sub>N → 20:1 hexanes/CH<sub>2</sub>Cl<sub>2</sub> w/ 0.5% Et<sub>3</sub>N eluent) affording tricycle **8b** (17.9 mg, 57% yield, R<sub>f</sub> = 0.81 in 2:1 CH<sub>2</sub>Cl<sub>2</sub>/hexanes, stained orange with *p*-anisaldehyde) as a colorless oil.

**Procedure B:** To a solution of enyne **7b** (13.3 mg, 60.4 μmol) in toluene (0.92 mL) in a 16 x 125 mm glass culture tube under argon was quickly added [Ir(dbcot)Cl]<sub>2</sub> (1.3 mg, 1.50 μmol). CO was bubbled through the solution using a balloon and needle outlet (ca. 30 s), during which time the solution turned a dark-blue/black color. The balloon was removed and argon was bubbled through the solution in the same manner. The septum was quickly replaced with a Teflon cap and the solution was stirred at 110 °C for 15.5 h. The reaction was allowed to cool to ambient temperature and was diluted with an approximately equal amount of hexanes. 1,3-Bis(diphenylphosphino)propane (dppp) (6.2 mg, 15.0 μmol) was also added to the mixture. The mixture was stirred for 15 min, then passed through a small plug of Al<sub>2</sub>O<sub>3</sub> (hexanes → 1:1 hexanes/EtOAc eluent). The solvent was removed by rotary evaporation and the resulting residue was purified by flash chromatography (99:1 hexanes/CH<sub>2</sub>Cl<sub>2</sub> w/ 0.5% Et<sub>3</sub>N → 20:1

hexanes/CH<sub>2</sub>Cl<sub>2</sub> w/ 0.5% Et<sub>3</sub>N eluent) affording tricycle **8b** (9.9 mg, 74% yield) as a colorless oil.

**Tricycle 8b:** <sup>1</sup>H NMR (400 MHz; C<sub>6</sub>D<sub>6</sub>): δ 3.74 (q, *J* = 12.4 Hz, 2H), 2.27-2.06 (m, 4H), 1.95-1.87 (m, 2H), 1.60-1.40 (m, 4H), 1.33-1.23 (m, 4H), 0.97 (d, *J* = 4.6 Hz, 3H), 0.93-0.91 (m, 3H), 0.41 (s, 1H), 0.35 (d, *J* = 3.6 Hz, 1H); <sup>13</sup>C NMR (100 MHz; C<sub>6</sub>D<sub>6</sub>): δ 147.5, 110.9, 70.5, 31.2, 30.6, 30.2, 28.1, 26.8, 25.5, 23.9, 23.8, 23.6, 23.3, 17.2, 14.4; IR (film) 2930, 2860, 1674, 1457, 1158 cm<sup>-1</sup>; HRMS (ESI+) *m/z* calc'd for (M + H)<sup>+</sup> [C<sub>15</sub>H<sub>24</sub>O + H]<sup>+</sup>: 221.1900, found 221.1894.

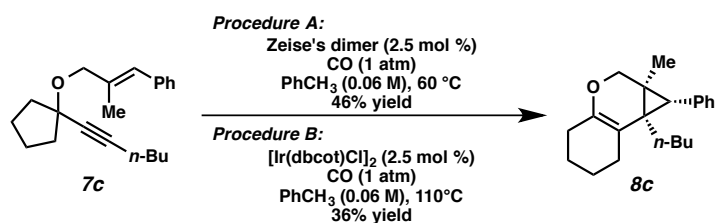

**Tricycle 8c. Procedure A:** To a solution of enyne **7c** (29.3 mg, 98.8 μmol) in toluene (1.5 mL) in a 2-dram vial under argon was quickly added [(C<sub>2</sub>H<sub>4</sub>)PtCl<sub>2</sub>]<sub>2</sub> (1.5 mg, 2.55 μmol). CO was bubbled through the solution using a balloon and needle outlet (ca. 30 s). The balloon and outlet were then removed and the solution was stirred at 60 °C for 24 h. The reaction was allowed to cool to ambient temperature and was diluted with an approximately equal amount of hexanes. The mixture was stirred for 15 min, then passed through a small plug of Al<sub>2</sub>O<sub>3</sub> (hexanes → 1:1 hexanes/EtOAc eluent). The solvent was removed by rotary evaporation and the resulting residue was purified by flash chromatography (99:1 hexanes/CH<sub>2</sub>Cl<sub>2</sub> w/ 0.5% Et<sub>3</sub>N → 6:1 hexanes/CH<sub>2</sub>Cl<sub>2</sub> w/ 0.5% Et<sub>3</sub>N eluent) affording tricycle **8c** (13.4 mg, 46% yield, R<sub>f</sub> = 0.75 in 1:1 CH<sub>2</sub>Cl<sub>2</sub>/hexanes, stained orange with *p*-anisaldehyde) as a colorless oil.

**Procedure B:** To a solution of enyne **7c** (23.6 mg, 79.6 μmol) in toluene (1.2 mL) in a 16 x 125 mm glass culture tube under argon was quickly added [Ir(dbcot)Cl]<sub>2</sub> (1.7 mg, 1.97 μmol). CO was bubbled through the solution using a balloon and needle outlet (ca. 30 s), during which time the solution turned a dark-blue/black color. The balloon was removed and argon was bubbled through the solution in the same manner. The septum was quickly replaced with a Teflon cap and the solution was stirred at 110 °C for 27 h. The reaction was allowed to cool to ambient temperature and was diluted with an approximately equal amount of hexanes. The mixture was stirred for 15 min, then passed through a small plug of Al<sub>2</sub>O<sub>3</sub> (hexanes → 1:1 hexanes/EtOAc eluent). The solvent was removed by rotary evaporation and the resulting residue was purified by flash chromatography (99:1 hexanes/CH<sub>2</sub>Cl<sub>2</sub> w/ 0.5% Et<sub>3</sub>N → 2:1 hexanes/CH<sub>2</sub>Cl<sub>2</sub> w/ 0.5% Et<sub>3</sub>N eluent) affording tricycle **8c** (8.4 mg, 36% yield) as a colorless oil.



**Tricycle 8c:**  $^1\text{H}$  NMR (400 MHz;  $\text{C}_6\text{D}_6$ ):  $\delta$  7.27-7.07 (m, 5H), 3.86 (ABq, 2H,  $\Delta\delta_{\text{AB}} = 0.12$ ,  $J_{\text{AB}} = 10.8$  Hz), 2.31-2.24 (m, 1H), 2.22-2.12 (m, 2H), 1.90-1.80 (m, 1H), 1.65-1.42 (m, 6H), 1.39-1.27 (m, 1H), 1.22-1.12 (m, 2H), 0.99 (s, 3H), 0.98-0.91 (m, 1H), 0.83-0.79 (m, 3H);  $^{13}\text{C}$  NMR (100 MHz;  $\text{C}_6\text{D}_6$ ):  $\delta$  147.8, 138.0, 131.2, 130.2, 128.5, 126.4, 111.6, 71.2, 38.5, 29.9, 28.8, 28.1, 27.8, 27.4, 25.6, 23.9, 23.6, 23.3, 14.5, 14.4; IR (film) 2930, 2859, 1497, 1156, 1156  $\text{cm}^{-1}$ ; HRMS (ESI+)  $m/z$  calc'd for  $(\text{M} + \text{H})^+ [\text{C}_{21}\text{H}_{28}\text{O} + \text{H}]^+$ : 297.2213, found 297.2212.

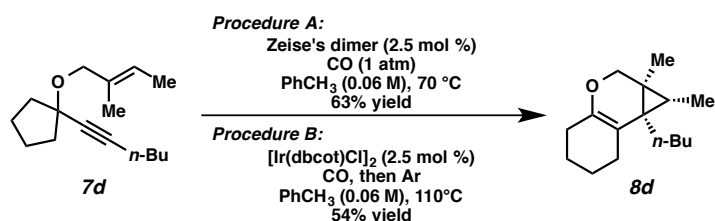

**Tricycle 8d. Procedure A:** To a solution of enyne **7d** (15.5 mg, 66.1  $\mu\text{mol}$ ) in toluene (1.1 mL) in a 2-dram vial under argon was quickly added  $[(\text{C}_2\text{H}_4)\text{PtCl}_2]_2$  (1.0 mg, 1.65  $\mu\text{mol}$ ). CO was bubbled through the solution using a balloon and needle outlet (ca. 30 s). The balloon and outlet were then removed and the solution was stirred at 70 °C for 17 h. The reaction was allowed to cool to ambient temperature and was diluted with an approximately equal amount of hexanes. The mixture was stirred for 15 min, then passed through a small plug of  $\text{Al}_2\text{O}_3$  (hexanes  $\rightarrow$  1:1 hexanes/EtOAc eluent). The solvent was removed by rotary evaporation and the resulting residue was purified by flash chromatography (hexanes w/ 0.5%  $\text{Et}_3\text{N}$   $\rightarrow$  10:1 hexanes/ $\text{CH}_2\text{Cl}_2$  w/ 0.5%  $\text{Et}_3\text{N}$  eluent) affording tricycle **8d** (9.8 mg, 63% yield,  $R_f = 0.84$  in 2:1  $\text{CH}_2\text{Cl}_2$ /hexanes, stained orange with *p*-anisaldehyde) as a colorless oil.

**Procedure B:** To a solution of enyne **7d** (14.4 mg, 61.4  $\mu\text{mol}$ ) in toluene (0.92 mL) in a 16 x 125 mm glass culture tube under argon was quickly added  $[\text{Ir}(\text{dbcot})\text{Cl}]_2$  (1.3 mg, 1.50  $\mu\text{mol}$ ). CO was bubbled through the solution using a balloon and needle outlet (ca. 30 s), during which time the solution turned a dark-blue/black color. The balloon was removed and argon was bubbled through the solution in the same manner. The septum was quickly replaced with a Teflon cap and the solution was stirred at 110 °C for 15.5 h. The reaction was allowed to cool to ambient temperature and was diluted with an approximately equal amount of hexanes. 1,3-Bis(diphenylphosphino)propane (dppp) (6.2 mg, 15.0  $\mu\text{mol}$ ) was also added to the mixture. The mixture was stirred for 15 min, then passed through a small plug of  $\text{Al}_2\text{O}_3$  (hexanes  $\rightarrow$  1:1 hexanes/EtOAc eluent). The solvent was removed by rotary evaporation and the resulting residue was purified by flash chromatography (99:1 hexanes/ $\text{CH}_2\text{Cl}_2$  w/ 0.5%  $\text{Et}_3\text{N}$   $\rightarrow$  50:1 hexanes/ $\text{CH}_2\text{Cl}_2$  w/ 0.5%  $\text{Et}_3\text{N}$  eluent) affording tricycle **8d** (7.8 mg, 54% yield) as a colorless oil.

**Tricycle 8d:**  $^1\text{H}$  NMR (400 MHz;  $\text{C}_6\text{D}_6$ ):  $\delta$  3.74 (q,  $J$  = 10.8 Hz, 2H), 2.24-2.04 (m, 4H), 1.98-1.91 (m, 1H), 1.56-1.44 (m, 4H), 1.34-1.28 (m, 4H), 1.02 (t,  $J$  = 3.1 Hz, 2H), 0.92 (t,  $J$  = 7.0 Hz, 6H), 0.88 (s, 3H);  $^{13}\text{C}$  NMR (100 MHz;  $\text{C}_6\text{D}_6$ ):  $\delta$  147.2, 112.4, 71.2, 30.0, 28.2, 27.7, 26.9, 25.6, 24.9, 23.9, 23.8, 23.3, 20.6, 14.4, 12.0, 9.0; IR (film) 2926, 2956, 1457, 1157  $\text{cm}^{-1}$ ; HRMS (ESI+)  $m/z$  calc'd for  $(\text{M} + \text{H})^+ [\text{C}_{16}\text{H}_{26}\text{O} + \text{H}]^+$ : 235.2056, found 235.2050.

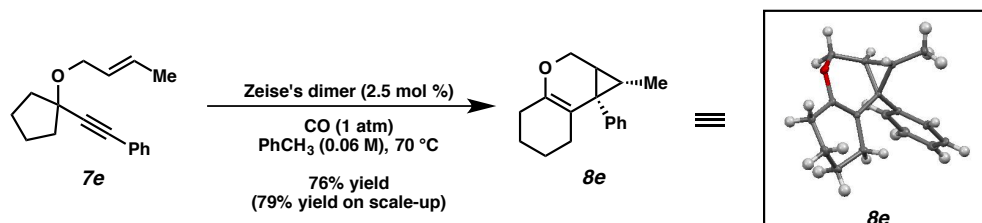

**Tricycle 8e. Procedure A:** To a solution of enyne **7e** (36.7 mg, 0.153 mmol) in toluene (2.5 mL) in a 2-dram vial under argon was quickly added  $[(\text{C}_2\text{H}_4)\text{PtCl}_2]_2$  (2.2 mg, 3.74  $\mu\text{mol}$ ). CO was bubbled through the solution using a balloon and needle outlet (ca. 30 s). The balloon and outlet were then removed and the solution was stirred at 70 °C for 19 h. The reaction was allowed to cool to ambient temperature and was diluted with an approximately equal amount of hexanes. The mixture was stirred for 15 min, then passed through a small plug of  $\text{Al}_2\text{O}_3$  (hexanes  $\rightarrow$  1:1 hexanes/ $\text{EtOAc}$  eluent). The solvent was removed by rotary evaporation and the resulting residue was purified by flash chromatography (hexanes w/ 0.5%  $\text{Et}_3\text{N}$   $\rightarrow$  20:1 hexanes/ $\text{CH}_2\text{Cl}_2$  w/ 0.5%  $\text{Et}_3\text{N}$  eluent) affording tricycle **8e** (27.9 mg, 76% yield,  $R_f$  = 0.81 in 2:1  $\text{CH}_2\text{Cl}_2$ /hexanes, stained red with *p*-anisaldehyde) as a colorless oil.

**Procedure A (Scale-up):** To a solution of enyne **7e** (0.2715 g, 1.13 mmol) in toluene (7.5 mL) in a 16 x 125 mm glass culture tube under argon was quickly added  $[(\text{C}_2\text{H}_4)\text{PtCl}_2]_2$  (16.6 mg, 28.3  $\mu\text{mol}$ ). CO was bubbled through the solution using a balloon and needle outlet (ca. 30 s). The balloon and outlet were then removed and the solution was stirred at 70 °C for 20 h. The reaction was allowed to cool to ambient temperature and the solvent was removed by rotary evaporation. The resulting residue was purified by flash chromatography (hexanes w/ 0.5%  $\text{Et}_3\text{N}$   $\rightarrow$  10:1 hexanes/ $\text{CH}_2\text{Cl}_2$  w/ 0.5%  $\text{Et}_3\text{N}$  eluent) affording tricycle **8e** (0.2151 g, 79% yield) as a colorless oil.

**Tricycle 8e:**  $^1\text{H}$  NMR (400 MHz;  $\text{C}_6\text{D}_6$ ):  $\delta$  7.22-7.17 (m, 4H), 7.10 (tt,  $J$  = 6.8, 2.2 Hz, 1H), 4.05-3.94 (m, 2H), 2.22-1.95 (m, 4H), 1.73 (dq,  $J$  = 15.4, 4.0 Hz, 1H), 1.45-1.35 (m, 4H), 1.13 (td,  $J$  = 4.9, 2.3 Hz, 1H), 0.86 (d,  $J$  = 6.3 Hz, 3H);  $^{13}\text{C}$  NMR (100 MHz;  $\text{C}_6\text{D}_6$ ):  $\delta$  145.5, 141.0, 132.0, 128.3, 126.6, 112.3, 63.2, 31.8, 29.9, 28.2, 27.4, 25.8, 23.7, 23.3, 16.1; IR (film) 2928, 2858, 1670, 1445, 1150  $\text{cm}^{-1}$ ; HRMS (ESI+)  $m/z$  calc'd for  $(\text{M} + \text{H})^+ [\text{C}_{17}\text{H}_{20}\text{O} + \text{H}]^+$ : 241.1587, found 241.1583.

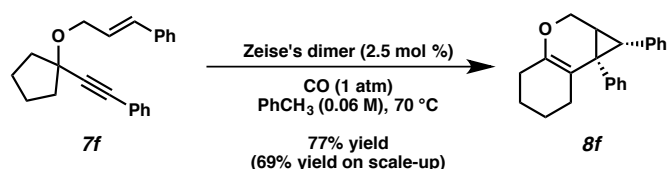

**Tricycle 8f. Procedure A:** To a solution of enyne **7f** (45.1 mg, 0.149 mmol) in toluene (2.5 mL) in a 2-dram vial under argon was quickly added  $[(\text{C}_2\text{H}_4)\text{PtCl}_2]_2$  (2.2 mg, 3.75  $\mu\text{mol}$ ). CO was bubbled through the solution using a balloon and needle outlet (ca. 30 s). The balloon and outlet were then removed and the solution was stirred at 70 °C for 18 h. The reaction was allowed to cool to ambient temperature and was diluted with an approximately equal amount of hexanes. The mixture was stirred for 15 min, then passed through a small plug of  $\text{Al}_2\text{O}_3$  (hexanes  $\rightarrow$  1:1 hexanes/EtOAc eluent). The solvent was removed by rotary evaporation and the resulting residue was purified by flash chromatography (hexanes w/ 0.5%  $\text{Et}_3\text{N}$   $\rightarrow$  20:1 hexanes/ $\text{CH}_2\text{Cl}_2$  w/ 0.5%  $\text{Et}_3\text{N}$  eluent) affording tricycle **8f** (34.7 mg, 77% yield,  $R_f = 0.80$  in 2:1  $\text{CH}_2\text{Cl}_2$ /hexanes, stained red with *p*-anisaldehyde) as a yellow oil.

**Procedure A (Scale-up):** To a solution of enyne **7f** (0.1271 g, 0.420 mmol) in toluene (2.8 mL) in a 16 x 125 mm glass culture tube under argon was quickly added  $[(\text{C}_2\text{H}_4)\text{PtCl}_2]_2$  (6.2 mg, 10.5  $\mu\text{mol}$ ). CO was bubbled through the solution using a balloon and needle outlet (ca. 30 s). The balloon and outlet were then removed and the solution was stirred at 70 °C for 41 h. The reaction was allowed to cool to ambient temperature and the solvent was removed by rotary evaporation. The resulting residue was purified by flash chromatography (hexanes w/ 0.5%  $\text{Et}_3\text{N}$   $\rightarrow$  20:1 hexanes/ $\text{CH}_2\text{Cl}_2$  w/ 0.5%  $\text{Et}_3\text{N}$  eluent) affording tricycle **8f** (87.5 mg, 69% yield) as a yellow oil.

**Tricycle 8f:**  $^1\text{H}$  NMR (400 MHz;  $\text{C}_6\text{D}_6$ ):  $\delta$  6.99-6.91 (m, 8H), 6.65 (dd,  $J = 7.7, 1.6$  Hz, 2H), 4.09-3.99 (m, 2H), 2.75 (d,  $J = 5.8$  Hz, 1H), 2.28-2.07 (m, 2H), 2.02-1.95 (m, 2H), 1.72-1.66 (m, 1H), 1.46-1.38 (m, 3H), 1.31-1.25 (m, 1H);  $^{13}\text{C}$  NMR (100 MHz;  $\text{C}_6\text{D}_6$ ):  $\delta$  146.1, 139.2, 132.4, 128.1, 127.9, 126.7, 125.7, 112.3, 62.7, 36.7, 34.9, 31.3, 28.3, 27.2, 23.6, 23.2; IR (film) 2928, 1666, 1496, 1191  $\text{cm}^{-1}$ ; HRMS (ESI+)  $m/z$  calc'd for  $(\text{M} + \text{H})^+ [\text{C}_{22}\text{H}_{22}\text{O} + \text{H}]^+$ : 303.1743, found 303.1740.

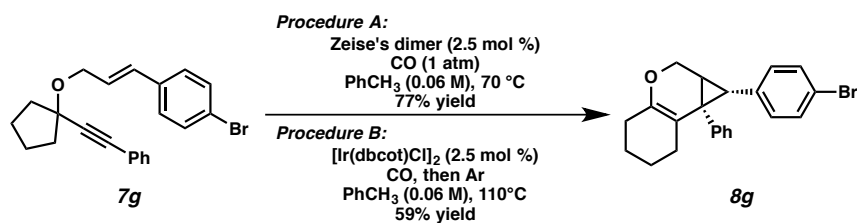

**Tricycle 8g. Procedure A:** To a solution of enyne **7g** (16.4 mg, 43.0  $\mu\text{mol}$ ) in toluene (0.70 mL) in a 2-dram vial under argon was quickly added  $[(\text{C}_2\text{H}_4)\text{PtCl}_2]_2$  (0.6 mg, 1.02  $\mu\text{mol}$ ). CO was bubbled through the solution using a balloon and needle outlet (ca. 30 s). The balloon and outlet were then removed and the solution was stirred at 70  $^\circ\text{C}$  for 18 h. The reaction was allowed to cool to ambient temperature and was diluted with an approximately equal amount of hexanes. The mixture was stirred for 15 min, then passed through a small plug of  $\text{Al}_2\text{O}_3$  (hexanes  $\rightarrow$  1:1 hexanes/EtOAc eluent). The solvent was removed by rotary evaporation and the resulting residue was purified by flash chromatography (hexanes w/ 0.5%  $\text{Et}_3\text{N}$   $\rightarrow$  20:1 hexanes/ $\text{CH}_2\text{Cl}_2$  w/ 0.5%  $\text{Et}_3\text{N}$  eluent) affording tricycle **8g** (12.7 mg, 77% yield,  $R_f = 0.79$  in 2:1  $\text{CH}_2\text{Cl}_2$ /hexanes, stained red with *p*-anisaldehyde) as a colorless oil.

**Procedure B:** To a solution of enyne **7g** (20.5 mg, 53.8  $\mu\text{mol}$ ) in toluene (0.92 mL) in a 16 x 125 mm glass culture tube under argon was quickly added  $[\text{Ir}(\text{dbcot})\text{Cl}]_2$  (1.3 mg, 1.50  $\mu\text{mol}$ ). CO was bubbled through the solution using a balloon and needle outlet (ca. 30 s), during which time the solution turned a dark-blue/black color. The balloon was removed and argon was bubbled through the solution in the same manner. The septum was quickly replaced with a Teflon cap and the solution was stirred at 110  $^\circ\text{C}$  for 6 h. The reaction was allowed to cool to ambient temperature and was diluted with an approximately equal amount of hexanes. 1,3-Bis(diphenylphosphino)propane (dppp) (7.4 mg, 17.9  $\mu\text{mol}$ ) was also added to the mixture. The mixture was stirred for 15 min, then passed through a small plug of  $\text{Al}_2\text{O}_3$  (hexanes  $\rightarrow$  1:1 hexanes/EtOAc eluent). The solvent was removed by rotary evaporation and the resulting residue was purified by flash chromatography (99:1 hexanes/ $\text{CH}_2\text{Cl}_2$  w/ 0.5%  $\text{Et}_3\text{N}$   $\rightarrow$  5:1 hexanes/ $\text{CH}_2\text{Cl}_2$  w/ 0.5%  $\text{Et}_3\text{N}$  eluent) affording tricycle **8g** (12.0 mg, 59% yield,  $R_f = 0.79$  in 2:1  $\text{CH}_2\text{Cl}_2$ /hexanes, stained red with *p*-anisaldehyde) as a colorless oil.

**Tricycle 8g:**  $^1\text{H}$  NMR (400 MHz;  $\text{C}_6\text{D}_6$ ):  $\delta$  7.04-7.02 (m, 2H), 6.97-6.95 (m, 3H), 6.89-6.87 (m, 2H), 6.27-6.25 (m, 2H), 4.03-3.92 (m, 2H), 2.57 (d,  $J = 5.8$  Hz, 1H), 2.26-2.05 (m, 2H), 1.98-1.89 (m, 1H), 1.83-1.79 (m, 1H), 1.70-1.60 (m, 1H), 1.46-1.37 (m, 3H), 1.30-1.21 (m, 1H);  $^{13}\text{C}$  NMR (100 MHz;  $\text{C}_6\text{D}_6$ ):  $\delta$  146.2, 138.6, 138.3, 132.3, 130.9, 129.7, 126.9, 119.5, 112.0, 62.5, 35.9, 35.0, 31.5, 28.2, 27.1, 23.5, 23.2; IR (film) 2928, 2858, 1668, 1491, 1145  $\text{cm}^{-1}$ ; HRMS (ESI+)  $m/z$  calc'd for  $(\text{M} + \text{H})^+ [\text{C}_{22}\text{H}_{21}\text{BrO} + \text{H}]^+$ : 381.0849, found 381.0842.

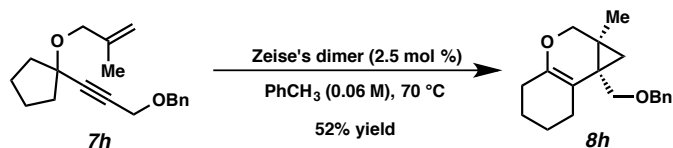

**Tricycle 8h. Procedure A:** To a solution of enyne **7h** (24.8 mg, 87.2  $\mu\text{mol}$ ) in toluene (1.3 mL) in a 2-dram vial under argon was quickly added  $[(\text{C}_2\text{H}_4)\text{PtCl}_2]_2$  (1.3 mg, 2.21  $\mu\text{mol}$ ). The solution was stirred at 70  $^\circ\text{C}$  for 23 h. The reaction was allowed to cool to ambient temperature

and was diluted with an approximately equal amount of hexanes. The mixture was stirred for 15 min, then passed through a small plug of Al<sub>2</sub>O<sub>3</sub> (hexanes → 1:1 hexanes/EtOAc eluent). The solvent was removed by rotary evaporation and the resulting residue was purified by flash chromatography (99:1 hexanes/CH<sub>2</sub>Cl<sub>2</sub> w/ 0.5% Et<sub>3</sub>N → 2:1 hexanes/CH<sub>2</sub>Cl<sub>2</sub> w/ 0.5% Et<sub>3</sub>N eluent) affording tricycle **8h** (12.8 mg, 52% yield, R<sub>f</sub> = 0.30 in 2:1 CH<sub>2</sub>Cl<sub>2</sub>/hexanes, stained blue with *p*-anisaldehyde) as a colorless oil.

**Tricycle 8h:** <sup>1</sup>H NMR (400 MHz; C<sub>6</sub>D<sub>6</sub>): δ 7.30-7.28 (m, 2H), 7.18-7.15 (m, 2H), 7.11-7.07 (m, 1H), 4.28 (ABq, 2H, Δδ<sub>AB</sub> = 0.10, J<sub>AB</sub> = 12.0 Hz), 3.72 (ABq, 2H, Δδ<sub>AB</sub> = 0.22, J<sub>AB</sub> = 10.0 Hz), 3.77 (d, J = 10.4 Hz, 1H), 2.91 (d, J = 10.4 Hz, 1H), 2.57-2.50 (m, 1H), 2.22-2.05 (m, 3H), 1.63-1.38 (m, 4H), 1.23-1.20 (m, 1H), 0.99 (s, 3H), 0.41-0.40 (m, 1H); <sup>13</sup>C NMR (100 MHz; C<sub>6</sub>D<sub>6</sub>): δ 146.2, 139.2, 128.5, 128.2, 127.7, 110.7, 73.1, 71.3, 68.0, 28.1, 28.0, 25.0, 24.5, 23.6, 23.2, 22.9, 16.0; IR (film) 2929, 2856, 1678, 1454, 1075 cm<sup>-1</sup>; HRMS (ESI+) *m/z* calc'd for (M + H)<sup>+</sup> [C<sub>19</sub>H<sub>24</sub>O<sub>2</sub> + H]<sup>+</sup>: 285.1849, found 285.1848.

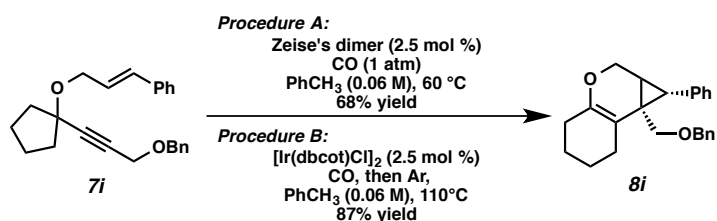

**Tricycle 8i. Procedure A:** To a solution of enyne **7i** (34.5 mg, 99.6 μmol) in toluene (1.5 mL) in a 2-dram vial under argon was quickly added [(C<sub>2</sub>H<sub>4</sub>)PtCl<sub>2</sub>]<sub>2</sub> (1.5 mg, 2.55 μmol). CO was bubbled through the solution using a balloon and needle outlet (ca. 30 s). The balloon and outlet were then removed and the solution was stirred at 60 °C for 20 h. The reaction was allowed to cool to ambient temperature and was diluted with an approximately equal amount of hexanes. The mixture was stirred for 15 min, then passed through a small plug of Al<sub>2</sub>O<sub>3</sub> (hexanes → 1:1 hexanes/EtOAc eluent). The solvent was removed by rotary evaporation and the resulting residue was purified by flash chromatography (99:1 hexanes/CH<sub>2</sub>Cl<sub>2</sub> w/ 0.5% Et<sub>3</sub>N → 20:1 hexanes/CH<sub>2</sub>Cl<sub>2</sub> w/ 0.5% Et<sub>3</sub>N eluent) affording tricycle **8i** (23.4 mg, 68% yield, R<sub>f</sub> = 0.46 (2:1 CH<sub>2</sub>Cl<sub>2</sub>/hexanes), stained blue with *p*-anisaldehyde) as a colorless oil.

**Procedure B:** To a solution of enyne **7i** (17.5 mg, 50.5 μmol) in toluene (0.77 mL) in a 16 x 125 mm glass culture tube under argon was quickly added [Ir(dbcot)Cl]<sub>2</sub> (1.1 mg, 1.25 μmol). CO was bubbled through the solution using a balloon and needle outlet (ca. 30 s), during which time the solution turned a dark-blue/black color. The balloon was removed and argon was bubbled through the solution in the same manner. The septum was quickly replaced with a Teflon cap and the solution was stirred at 110 °C for 16 h. The reaction was allowed to cool to ambient temperature and was diluted with an approximately equal amount of hexanes. 1,3-

Bis(diphenylphosphino)propane (dppp) (6.2 mg, 1.50  $\mu$ mol) was also added to the mixture. The mixture was stirred for 15 min, then passed through a small plug of  $\text{Al}_2\text{O}_3$  (hexanes  $\rightarrow$  1:1 hexanes/EtOAc eluent). The solvent was removed by rotary evaporation and the resulting residue was purified by flash chromatography (99:1 hexanes/ $\text{CH}_2\text{Cl}_2$  w/ 0.5%  $\text{Et}_3\text{N}$   $\rightarrow$  10:1 hexanes/ $\text{CH}_2\text{Cl}_2$  w/ 0.5%  $\text{Et}_3\text{N}$  eluent) affording tricycle **8i** (15.2 mg, 87% yield,  $R_f$  = 0.46 (2:1  $\text{CH}_2\text{Cl}_2$ /hexanes), stained blue with *p*-anisaldehyde) as a colorless oil.

**Tricycle 8i:**  $^1\text{H}$  NMR (400 MHz;  $\text{C}_6\text{D}_6$ ):  $\delta$  7.14-7.02 (m, 10H), 4.10 (ABq, 2H,  $\Delta\delta_{\text{AB}}$  = 0.08,  $J_{\text{AB}}$  = 12.0 Hz), 4.01-3.91 (m, 2H), 3.50 (d,  $J$  = 10.5 Hz, 1H), 2.94 (d,  $J$  = 10.5 Hz, 1H), 2.60 (d,  $J$  = 5.9 Hz, 1H), 2.57-2.50 (m, 1H), 2.31-2.07 (m, 3H), 1.80-1.77 (m, 1H), 1.61-1.49 (m, 4H);  $^{13}\text{C}$  NMR (100 MHz;  $\text{C}_6\text{D}_6$ ):  $\delta$  146.7, 139.3, 138.3, 129.3, 128.5, 128.2, 127.9, 127.5, 126.4, 111.2, 72.8, 71.1, 62.5, 35.2, 28.2, 27.3, 26.5, 25.4, 23.7, 23.3; IR (film) 3028, 2929, 2858, 1672, 1453, 1096  $\text{cm}^{-1}$ ; HRMS (ESI+)  $m/z$  calc'd for  $(\text{M} + \text{H})^+$  [ $\text{C}_{24}\text{H}_{26}\text{O}_2 + \text{H}$ ] $^+$ : 347.2006, found 347.2009.

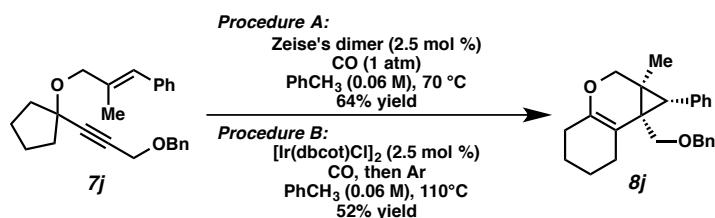

**Tricycle 8j. Procedure A:** To a solution of enyne **7j** (52.9 mg, 0.148 mmol) in toluene (2.5 mL) in a 2-dram vial under argon was quickly added  $[(\text{C}_2\text{H}_4)\text{PtCl}_2]_2$  (2.2 mg, 3.75  $\mu$ mol). CO was bubbled through the solution using a balloon and needle outlet (ca. 30 s). The balloon and outlet were then removed and the solution was stirred at 70 °C for 18 h. The reaction was allowed to cool to ambient temperature and was diluted with an approximately equal amount of hexanes. The mixture was stirred for 15 min, then passed through a small plug of  $\text{Al}_2\text{O}_3$  (hexanes  $\rightarrow$  1:1 hexanes/EtOAc eluent). The solvent was removed by rotary evaporation and the resulting residue was purified by flash chromatography (hexanes w/ 0.5%  $\text{Et}_3\text{N}$   $\rightarrow$  20:1 hexanes/ $\text{CH}_2\text{Cl}_2$  w/ 0.5%  $\text{Et}_3\text{N}$  eluent) affording tricycle **8j** (34.1 mg, 64% yield,  $R_f$  = 0.42 in 2:1  $\text{CH}_2\text{Cl}_2$ /hexanes, stained red with *p*-anisaldehyde) as a yellow oil.

**Procedure B:** To a solution of enyne **7j** (28.1 mg, 77.9  $\mu$ mol) in toluene (1.2 mL) in a 16 x 125 mm glass culture tube under argon was quickly added  $[\text{Ir}(\text{dbcot})\text{Cl}]_2$  (1.7 mg, 1.97  $\mu$ mol). CO was bubbled through the solution using a balloon and needle outlet (ca. 30 s), during which time the solution turned a dark-blue/black color. The balloon was removed and argon was bubbled through the solution in the same manner. The septum was quickly replaced with a Teflon cap and the solution was stirred at 110 °C for 16 h. The reaction was allowed to cool to ambient temperature and was diluted with an approximately equal amount of hexanes. The mixture was stirred for 15 min, then passed through a small plug of  $\text{Al}_2\text{O}_3$  (hexanes  $\rightarrow$  1:1



hexanes/EtOAc eluent). The solvent was removed by rotary evaporation and the resulting residue was purified by flash chromatography (99:1 hexanes/CH<sub>2</sub>Cl<sub>2</sub> w/ 0.5% Et<sub>3</sub>N → 2:1 hexanes/CH<sub>2</sub>Cl<sub>2</sub> w/ 0.5% Et<sub>3</sub>N eluent) affording tricycle **8j** (14.5 mg, 52% yield) as a yellow oil.

**Tricycle 8j:** <sup>1</sup>H NMR (400 MHz; C<sub>6</sub>D<sub>6</sub>): δ 7.22 (d, *J* = 7.2 Hz, 2H), 7.13 (dt, *J* = 5.9, 2.1 Hz, 4H), 7.10-7.02 (m, 4H), 4.09 (ABq, 2H, Δδ<sub>AB</sub> = 0.07, *J*<sub>AB</sub> = 12.0 Hz), 3.85 (ABq, 2H, Δδ<sub>AB</sub> = 0.30, *J*<sub>AB</sub> = 10.0 Hz), 3.92 (d, *J* = 10.0 Hz, 1H), 3.00 (d, *J* = 10.0 Hz, 1H), 2.84 (s, 1H), 2.64-2.57 (m, 1H), 2.32-2.25 (m, 1H), 2.19-2.13 (m, 2H), 1.65-1.45 (m, 4H), 1.09 (s, 3H); <sup>13</sup>C NMR (100 MHz; C<sub>6</sub>D<sub>6</sub>): δ 146.5, 139.2, 137.6, 130.8, 128.6, 128.5, 127.9, 127.6, 126.5, 111.5, 73.3, 69.2, 68.4, 36.5, 31.9, 28.1, 27.7, 25.1, 23.7, 23.6, 23.1, 13.1; IR (film) 2930, 2856, 1678, 1445, 1155 cm<sup>-1</sup>; HRMS (ESI+) *m/z* calc'd for (M + H)<sup>+</sup> [C<sub>25</sub>H<sub>28</sub>O<sub>2</sub> + H]<sup>+</sup>: 361.2162, found 361.2169.

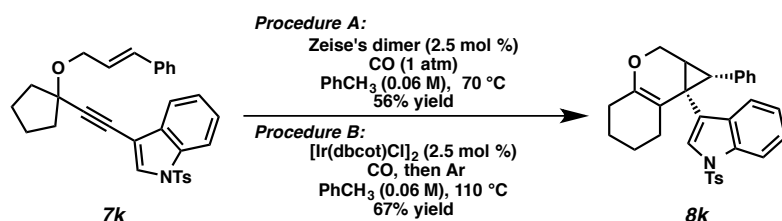

**Tricycle 8k. Procedure A:** To a solution of enyne **7k** (78.0 mg, 0.157 mmol) in toluene (2.5 mL) in a 2-dram vial under argon was quickly added [(C<sub>2</sub>H<sub>4</sub>)PtCl<sub>2</sub>]<sub>2</sub> (2.2 mg, 3.75 μmol). CO was bubbled through the solution using a balloon and needle outlet (ca. 30 s). The balloon and outlet were then removed and the solution was stirred at 70 °C for 20.5 h. The reaction was allowed to cool to ambient temperature and was diluted with an approximately equal amount of hexanes. The mixture was stirred for 15 min, then passed through a small plug of Al<sub>2</sub>O<sub>3</sub> (hexanes → 1:1 hexanes/EtOAc eluent). The solvent was removed by rotary evaporation and the resulting residue was purified by flash chromatography (hexanes w/ 0.5% Et<sub>3</sub>N → 10:1 hexanes/CH<sub>2</sub>Cl<sub>2</sub> w/ 0.5% Et<sub>3</sub>N eluent) affording tricycle **8k** (43.6 mg, 56% yield, R<sub>f</sub> = 0.67 in 2:1 CH<sub>2</sub>Cl<sub>2</sub>/hexanes, stained purple with *p*-anisaldehyde) as a colorless oil.

**Procedure B:** To a solution of enyne **7k** (49.7 mg, 99.9 μmol) in toluene (1.7 mL) in a 16 x 125 mm glass culture tube under argon was quickly added [Ir(dbcot)Cl]<sub>2</sub> (2.2 mg, 2.55 μmol). CO was bubbled through the solution using a balloon and needle outlet (ca. 30 s), during which time the solution turned a dark-blue/black color. The balloon was removed and argon was bubbled through the solution in the same manner. The septum was quickly replaced with a Teflon cap and the solution was stirred at 110 °C for 15 h. The reaction was allowed to cool to ambient temperature and was diluted with an approximately equal amount of hexanes. The mixture was stirred for 15 min, then passed through a small plug of Al<sub>2</sub>O<sub>3</sub> (hexanes → 1:1 hexanes/EtOAc eluent). The solvent was removed by rotary evaporation and the resulting residue was purified by flash chromatography (hexanes w/ 0.5% Et<sub>3</sub>N → 9:1 hexanes/CH<sub>2</sub>Cl<sub>2</sub> w/ 0.5%

Et<sub>3</sub>N eluent) affording tricycle **8k** (33.1 mg, 67% yield, *R*<sub>f</sub> = 0.56 in 2:1 CH<sub>2</sub>Cl<sub>2</sub>/hexanes, stained purple with *p*-anisaldehyde) as a colorless oil.

**Tricycle 8k:** <sup>1</sup>H NMR (400 MHz; C<sub>6</sub>D<sub>6</sub>): δ 8.15 (d, *J* = 8.2 Hz, 1H), 7.54-7.52 (m, 1H), 7.42 (d, *J* = 8.3 Hz, 2H), 7.07-6.96 (m, 2H), 6.92-6.85 (m, 4H), 6.68 (d, *J* = 7.0 Hz, 2H), 6.51 (d, *J* = 8.1 Hz, 2H), 3.98-3.91 (m, 2H), 2.71 (d, *J* = 6.0 Hz, 1H), 2.19-2.00 (m, 3H), 1.84 (dt, *J* = 5.8, 2.8 Hz, 1H), 1.68 (s, 3H), 1.53-1.44 (m, 2H), 1.41-1.11 (m, 5H), 0.38-0.34 (m, 2H); <sup>13</sup>C NMR (100 MHz; C<sub>6</sub>D<sub>6</sub>): δ 179.4, 144.2, 138.8, 132.6, 129.7, 128.5, 128.2, 127.9, 127.2, 126.1, 124.9, 123.4, 114.2, 62.9, 28.2, 26.5, 23.6, 23.2, 21.1; IR (film) 2929, 2858, 1447, 1188 cm<sup>-1</sup>; HRMS (ESI+) *m/z* calc'd for (M + H)<sup>+</sup> [C<sub>31</sub>H<sub>29</sub>NO<sub>3</sub>S + H]<sup>+</sup>: 496.1941, found 496.1926.

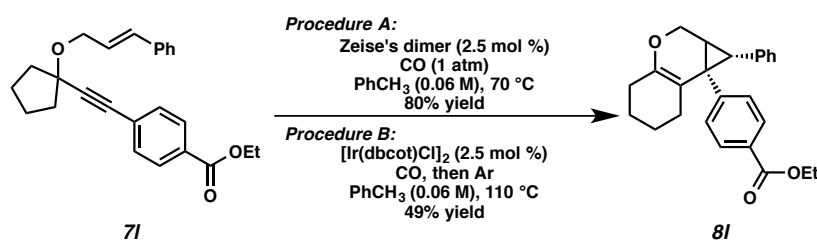

**Tricycle 8I. Procedure A:** To a solution of enyne **7I** (55.7 mg, 0.149 mmol) in toluene (2.5 mL) in a 2-dram vial under argon was quickly added [(C<sub>2</sub>H<sub>4</sub>)PtCl<sub>2</sub>]<sub>2</sub> (2.2 mg, 3.75 μmol). CO was bubbled through the solution using a balloon and needle outlet (ca. 30 s). The balloon and outlet were then removed and the solution was stirred at 70 °C for 20.5 h. The reaction was allowed to cool to ambient temperature and was diluted with an approximately equal amount of hexanes. The mixture was stirred for 15 min, then passed through a small plug of Al<sub>2</sub>O<sub>3</sub> (hexanes → 1:1 hexanes/EtOAc eluent). The solvent was removed by rotary evaporation and the resulting residue was purified by flash chromatography (hexanes w/ 0.5% Et<sub>3</sub>N → 10:1 hexanes/CH<sub>2</sub>Cl<sub>2</sub> w/ 0.5% Et<sub>3</sub>N eluent) affording tricycle **8I** (44.6 mg, 80% yield, *R*<sub>f</sub> = 0.55 in 2:1 CH<sub>2</sub>Cl<sub>2</sub>/hexanes, stained purple with *p*-anisaldehyde) as a yellow oil.

**Procedure B:** To a solution of enyne **7I** (34.6 mg, 99.6 μmol) in toluene (1.7 mL) in a 16 x 125 mm glass culture tube under argon was quickly added [Ir(dbcot)Cl]<sub>2</sub> (2.2 mg, 2.55 μmol). CO was bubbled through the solution using a balloon and needle outlet (ca. 30 s), during which time the solution turned a dark-blue/black color. The balloon was removed and argon was bubbled through the solution in the same manner. The septum was quickly replaced with a Teflon cap and the solution was stirred at 110 °C for 15 h. The reaction was allowed to cool to ambient temperature and was diluted with an approximately equal amount of hexanes. The mixture was stirred for 15 min, then passed through a small plug of Al<sub>2</sub>O<sub>3</sub> (hexanes → 1:1 hexanes/EtOAc eluent). The solvent was removed by rotary evaporation and the resulting residue was purified by flash chromatography (hexanes w/ 0.5% Et<sub>3</sub>N → 2:1 hexanes/CH<sub>2</sub>Cl<sub>2</sub> w/ 0.5% Et<sub>3</sub>N eluent) affording tricycle **8I** (16.8 mg, 49% yield) as a yellow oil.



**Tricycle 8l:**  $^1\text{H}$  NMR (400 MHz;  $\text{C}_6\text{D}_6$ ):  $\delta$  8.02 (d,  $J$  = 8.3 Hz, 2H), 6.97-6.91 (m, 5H), 6.59 (dd,  $J$  = 7.6, 1.9 Hz, 2H), 4.12-4.05 (m, 2H), 4.04-3.92 (m, 2H), 2.74 (d,  $J$  = 5.8 Hz, 1H), 2.27-2.05 (m, 2H), 1.93-1.91 (m, 1H), 1.90-1.86 (m, 1H), 1.61-1.58 (m, 1H), 1.46-1.39 (m, 3H), 1.31-1.23 (m, 1H), 0.98 (t,  $J$  = 7.1 Hz, 3H);  $^{13}\text{C}$  NMR (100 MHz;  $\text{C}_6\text{D}_6$ ):  $\delta$  166.2, 146.5, 144.4, 138.6, 132.5, 129.4, 126.0, 111.4, 62.5, 60.7, 36.7, 34.7, 30.8, 28.2, 27.0, 23.5, 23.1, 14.3; IR (film) 2931, 2859, 1716, 1274, 1101  $\text{cm}^{-1}$ ; HRMS (ESI+)  $m/z$  calc'd for  $(\text{M} + \text{H})^+$  [ $\text{C}_{25}\text{H}_{26}\text{O}_3 + \text{H}$ ] $^+$ : 375.1955, found 375.1943.

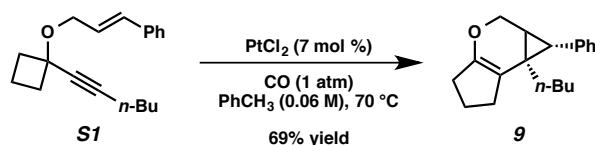

**Tricycle 9. Procedure C:** To a solution of enyne **S1** (40.6 mg, 0.151 mmol) in toluene (2.5 mL) in a 2-dram vial under argon was quickly added  $\text{PtCl}_2$  (2.8 mg, 1.05  $\mu\text{mol}$ ). CO was bubbled through the solution using a balloon and needle outlet (ca. 30 s). The balloon and outlet were then removed and the solution was stirred at 70  $^\circ\text{C}$  for 16 h. The reaction was allowed to cool to ambient temperature and was diluted with an approximately equal amount of hexanes. The mixture was stirred for 15 min, then passed through a small plug of  $\text{Al}_2\text{O}_3$  (hexanes  $\rightarrow$  1:1 hexanes/ $\text{EtOAc}$  eluent). The solvent was removed by rotary evaporation and the resulting residue was purified by flash chromatography (hexanes w/ 0.5%  $\text{Et}_3\text{N}$   $\rightarrow$  2:1 hexanes/ $\text{CH}_2\text{Cl}_2$  w/ 0.5%  $\text{Et}_3\text{N}$  eluent) affording tricycle **9** (27.9 mg, 69% yield,  $R_f$  = 0.86 in 2:1  $\text{CH}_2\text{Cl}_2$ /hexanes, stained brown with *p*-anisaldehyde) as a colorless oil.

**Tricycle 9:**  $^1\text{H}$  NMR (400 MHz;  $\text{C}_6\text{D}_6$ ):  $\delta$  7.20-7.13 (m, 2H), 7.06 (dd,  $J$  = 7.3, 5.0 Hz, 3H), 4.19-4.16 (m, 1H), 4.01 (dd,  $J$  = 10.7, 2.9 Hz, 1H), 2.54-2.32 (m, 4H), 1.94-1.84 (m, 1H), 1.75-1.66 (m, 2H), 1.59-1.52 (m, 1H), 1.41-1.07 (m, 8H), 0.81 (t,  $J$  = 7.3 Hz, 3H);  $^{13}\text{C}$  NMR (100 MHz;  $\text{C}_6\text{D}_6$ ):  $\delta$  150.3, 138.9, 129.2, 128.4, 126.2, 113.1, 64.2, 37.4, 31.8, 30.6, 29.9, 29.8, 26.5, 26.0, 23.2, 19.5, 14.4; IR (film) 3026, 2960, 1682, 1464, 1152, 698  $\text{cm}^{-1}$ ; HRMS (ESI+)  $m/z$  calc'd for  $(\text{M} + \text{H})^+$  [ $\text{C}_{19}\text{H}_{24}\text{O} + \text{H}$ ] $^+$ : 269.1900, found 269.1910.

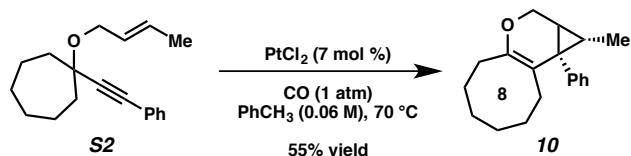

**Tricycle 10. Procedure C:** To a solution of enyne **S2** (40.9 mg, 0.152 mmol) in toluene (2.5 mL) in a 2-dram vial under argon was quickly added  $\text{PtCl}_2$  (2.8 mg, 1.05  $\mu\text{mol}$ ). CO was bubbled

through the solution using a balloon and needle outlet (ca. 30 s). The balloon and outlet were then removed and the solution was stirred at 70 °C for 16 h. The reaction was allowed to cool to ambient temperature and was diluted with an approximately equal amount of hexanes. The mixture was stirred for 15 min, then passed through a small plug of Al<sub>2</sub>O<sub>3</sub> (hexanes → 1:1 hexanes/EtOAc eluent). The solvent was removed by rotary evaporation and the resulting residue was purified by flash chromatography (hexanes w/ 0.5% Et<sub>3</sub>N → 1:1 hexanes/CH<sub>2</sub>Cl<sub>2</sub> w/ 0.5% Et<sub>3</sub>N eluent) affording tricycle **10** (22.5 mg, 55% yield, R<sub>f</sub> = 0.85 in 2:1 CH<sub>2</sub>Cl<sub>2</sub>/hexanes, stained blue with *p*-anisaldehyde) as a colorless oil.

**Tricycle 10:** <sup>1</sup>H NMR (400 MHz; C<sub>6</sub>D<sub>6</sub>): δ 7.26-7.24 (m, 2H), 7.16 (d, *J* = 14.8 Hz, 2H), 7.08 (dd, *J* = 8.5, 6.1 Hz, 1H), 4.05-3.93 (m, 2H), 2.33-2.16 (m, 2H), 2.08 (d, *J* = 6.3 Hz, 1H), 1.67-1.33 (m, 8H), 1.20-1.13 (m, 2H), 1.05 (dt, *J* = 5.3, 2.6 Hz, 1H), 0.90 (d, *J* = 6.4 Hz, 3H); <sup>13</sup>C NMR (100 MHz; C<sub>6</sub>D<sub>6</sub>): δ 148.0, 141.6, 132.0, 127.9, 126.6, 112.9, 63.4, 31.7, 31.3, 30.3, 29.6, 29.3, 27.53, 27.51, 26.8, 25.8, 16.3; IR (film) 2923, 2851, 1658, 1493, 1164, 703 cm<sup>-1</sup>; HRMS (ESI+) *m/z* calc'd for (M + H)<sup>+</sup> [C<sub>19</sub>H<sub>24</sub>O + H]<sup>+</sup>: 269.1900, found 269.1897.

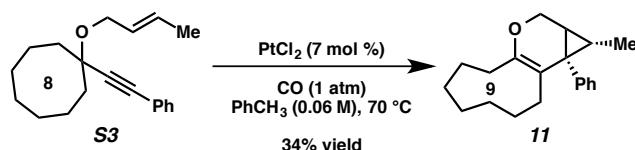

**Tricycle 11. Procedure C:** To a solution of enyne **S3** (42.8 mg, 0.152 mmol) in toluene (2.5 mL) in a 2-dram vial under argon was quickly added PtCl<sub>2</sub> (2.8 mg, 1.05 μmol). CO was bubbled through the solution using a balloon and needle outlet (ca. 30 s). The balloon and outlet were then removed and the solution was stirred at 70 °C for 20.5 h. The reaction was allowed to cool to ambient temperature and was diluted with an approximately equal amount of hexanes. The mixture was stirred for 15 min, then passed through a small plug of Al<sub>2</sub>O<sub>3</sub> (hexanes → 1:1 hexanes/EtOAc eluent). The solvent was removed by rotary evaporation and the resulting residue was purified by flash chromatography (hexanes w/ 0.5% Et<sub>3</sub>N → 10:1 hexanes/CH<sub>2</sub>Cl<sub>2</sub> w/ 0.5% Et<sub>3</sub>N eluent) affording tricycle **11** (13.6 mg, 34% yield, R<sub>f</sub> = 0.85 in 2:1 CH<sub>2</sub>Cl<sub>2</sub>/hexanes, stained blue with *p*-anisaldehyde) as a yellow oil.

**Tricycle 11:** <sup>1</sup>H NMR (400 MHz; C<sub>6</sub>D<sub>6</sub>): δ 7.28-7.26 (m, 2H), 7.18-7.15 (m, 2H), 7.11-7.06 (m, 1H), 3.99 (qd, *J* = 11.3, 3.2 Hz, 2H), 2.33-2.17 (m, 2H), 2.11 (dd, *J* = 4.2, 3.1 Hz, 1H), 1.69-1.59 (m, 2H), 1.51-1.30 (m, 10H), 1.08 (dd, *J* = 3.1, 2.1 Hz, 1H), 0.91 (d, *J* = 6.4 Hz, 3H); <sup>13</sup>C NMR (100 MHz; C<sub>6</sub>D<sub>6</sub>): δ 148.6, 141.8, 132.1, 128.2, 126.6, 114.6, 64.2, 31.0, 30.4, 29.7, 28.2, 26.8, 26.5, 26.2, 25.7, 25.5, 25.4, 16.3; IR (film) 2926, 2853, 1653, 1493, 1146, 704 cm<sup>-1</sup>; HRMS (ESI+) *m/z* calc'd for (M + H)<sup>+</sup> [C<sub>20</sub>H<sub>26</sub>O + H]<sup>+</sup>: 283.2056, found 283.2056.

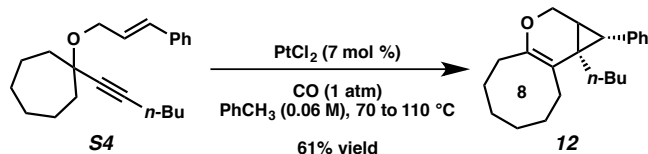

**Tricycle 12. Procedure C:** To a solution of enyne **S4** (12.7 mg, 40.9  $\mu\text{mol}$ ) in toluene (0.67 mL) in a 2-dram vial under argon was quickly added  $\text{PtCl}_2$  (0.7 mg, 2.63  $\mu\text{mol}$ ). CO was bubbled through the solution using a balloon and needle outlet (ca. 30 s). The balloon and outlet were then removed and the solution was stirred at 70  $^\circ\text{C}$  for 21 h, then at 110  $^\circ\text{C}$  for 24 h. The reaction was allowed to cool to ambient temperature and was diluted with an approximately equal amount of hexanes. The mixture was stirred for 15 min, then passed through a small plug of  $\text{Al}_2\text{O}_3$  (hexanes  $\rightarrow$  1:1 hexanes/ $\text{EtOAc}$  eluent). The solvent was removed by rotary evaporation and the resulting residue was purified by flash chromatography (99:1 hexanes/ $\text{CH}_2\text{Cl}_2$  w/ 0.5%  $\text{Et}_3\text{N}$   $\rightarrow$  5:1 hexanes/ $\text{CH}_2\text{Cl}_2$  w/ 0.5%  $\text{Et}_3\text{N}$  eluent) affording tricycle **12** (7.7 mg, 61% yield,  $R_f$  = 0.84 in 2:1  $\text{CH}_2\text{Cl}_2$ /hexanes, stained purple with *p*-anisaldehyde) as a yellow oil.

**Tricycle 12:**  $^1\text{H}$  NMR (400 MHz;  $\text{C}_6\text{D}_6$ ):  $\delta$  7.19-7.17 (m, 2H), 7.13-7.11 (m, 2H), 7.09-7.05 (m, 1H), 4.04-3.97 (m, 2H), 2.42 (d,  $J$  = 5.7 Hz, 1H), 2.39-2.14 (m, 4H), 1.79-1.10 (m, 14H), 0.82 (t,  $J$  = 7.3 Hz, 3H), 0.58 (ddd,  $J$  = 14.1, 11.1, 5.8 Hz, 1H);  $^{13}\text{C}$  NMR (100 MHz;  $\text{C}_6\text{D}_6$ ):  $\delta$  139.1, 129.3, 128.4, 126.2, 110.4, 63.5, 36.3, 31.6, 30.4, 30.3, 30.1, 29.5, 27.6, 26.9, 25.7, 25.6, 25.4, 23.2, 14.5; IR (film) 2924, 2854, 1660, 1447, 1128, 698  $\text{cm}^{-1}$ ; HRMS (ESI+)  $m/z$  calc'd for  $(\text{M} + \text{H})^+ [\text{C}_{22}\text{H}_{30}\text{O} + \text{H}]^+$ : 311.2369, found 311.2355.

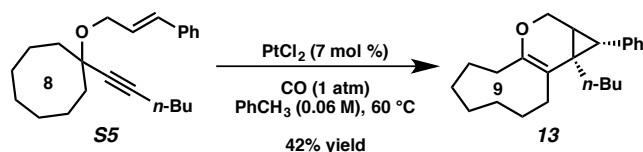

**Tricycle 13. Procedure C:** To a solution of enyne **S5** (19.6 mg, 60.4  $\mu\text{mol}$ ) in toluene (1.0 mL) in a 2-dram vial under argon was quickly added  $\text{PtCl}_2$  (1.2 mg, 4.51  $\mu\text{mol}$ ). CO was bubbled through the solution using a balloon and needle outlet (ca. 30 s). The balloon and outlet were then removed and the solution was stirred at 60  $^\circ\text{C}$  for 21 h. The reaction was allowed to cool to ambient temperature and was diluted with an approximately equal amount of hexanes. The mixture was stirred for 15 min, then passed through a small plug of  $\text{Al}_2\text{O}_3$  (hexanes  $\rightarrow$  1:1 hexanes/ $\text{EtOAc}$  eluent). The solvent was removed by rotary evaporation and the resulting residue was purified by flash chromatography (99:1 hexanes/ $\text{CH}_2\text{Cl}_2$  w/ 0.5%  $\text{Et}_3\text{N}$   $\rightarrow$  20:1 hexanes/ $\text{CH}_2\text{Cl}_2$  w/ 0.5%  $\text{Et}_3\text{N}$  eluent) affording tricycle **13** (8.3 mg, 42% yield,  $R_f$  = 0.87 in 2:1  $\text{CH}_2\text{Cl}_2$ /hexanes, stained blue with *p*-anisaldehyde) as a yellow oil.

**Tricycle 13:**  $^1\text{H}$  NMR (400 MHz;  $\text{C}_6\text{D}_6$ ):  $\delta$  7.20-7.17 (m, 1H), 7.15-7.13 (m, 2H), 7.10-7.06 (m, 1H), 4.04 (dd,  $J = 10.7, 4.0$  Hz, 1H), 3.98-3.94 (m, 1H), 2.42 (d,  $J = 5.7$  Hz, 1H), 2.39-2.30 (m, 3H), 2.21-2.15 (m, 1H), 1.81-1.08 (m, 19H), 0.82 (t,  $J = 7.3$  Hz, 3H), 0.60 (ddd,  $J = 14.1, 11.2, 5.7$  Hz, 1H);  $^{13}\text{C}$  NMR (100 MHz;  $\text{C}_6\text{D}_6$ ):  $\delta$  150.8, 139.1, 129.3, 128.4, 126.3, 111.3, 64.1, 37.0, 30.6, 30.4, 29.7, 27.1, 26.9, 26.5, 26.2, 25.6, 25.5, 24.9, 24.3, 23.3, 14.5; IR (film) 2926, 2856, 1654, 1497, 1183  $\text{cm}^{-1}$ ; HRMS (ESI+)  $m/z$  calc'd for  $(\text{M} + \text{H})^+ [\text{C}_{23}\text{H}_{32}\text{O} + \text{H}]^+$ : 325.2526, found 325.2517.

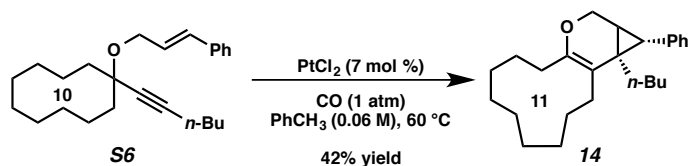

**Tricycle 14. Procedure C:** To a solution of enyne **S6** (21.1 mg, 59.8  $\mu\text{mol}$ ) in toluene (1.0 mL) in a 2-dram vial under argon was quickly added  $\text{PtCl}_2$  (1.2 mg, 4.51  $\mu\text{mol}$ ). CO was bubbled through the solution using a balloon and needle outlet (ca. 30 s). The balloon and outlet were then removed and the solution was stirred at 60  $^\circ\text{C}$  for 21 h. The reaction was allowed to cool to ambient temperature and was diluted with an approximately equal amount of hexanes. The mixture was stirred for 15 min, then passed through a small plug of  $\text{Al}_2\text{O}_3$  (hexanes  $\rightarrow$  1:1 hexanes/ $\text{EtOAc}$  eluent). The solvent was removed by rotary evaporation and the resulting residue was purified by flash chromatography (99:1 hexanes/ $\text{CH}_2\text{Cl}_2$  w/ 0.5%  $\text{Et}_3\text{N}$   $\rightarrow$  10:1 hexanes/ $\text{CH}_2\text{Cl}_2$  w/ 0.5%  $\text{Et}_3\text{N}$  eluent) affording tricycle **14** (8.9 mg, 42% yield,  $R_f = 0.86$  in 2:1  $\text{CH}_2\text{Cl}_2$ /hexanes, stained brown/blue in *p*-anisaldehyde) as a colorless oil.

**Tricycle 14:**  $^1\text{H}$  NMR (400 MHz;  $\text{C}_6\text{D}_6$ ):  $\delta$  7.22-7.19 (m, 4H), 7.11-7.07 (m, 1H), 4.26 (dd,  $J = 11.3, 6.3$  Hz, 1H), 3.62 (dd,  $J = 11.4, 4.6$  Hz, 1H), 2.54-2.39 (m, 2H), 2.30-2.21 (m, 2H), 2.18 (d,  $J = 5.2$  Hz, 1H), 2.00-1.89 (m, 2H), 1.74-1.08 (m, 18H), 0.80 (t,  $J = 7.3$  Hz, 3H), 0.69 (ddd,  $J = 14.0, 11.1, 5.7$  Hz, 1H);  $^{13}\text{C}$  NMR (100 MHz;  $\text{C}_6\text{D}_6$ ):  $\delta$  151.3, 139.1, 129.1, 128.4, 126.3, 112.4, 66.9, 39.5, 29.9, 29.7, 29.3, 27.8, 26.8, 26.44, 26.4, 26.3, 25.8, 25.53, 25.48, 25.2, 23.2, 22.4, 14.4; IR (film) 2927, 2857, 1498, 1154, 721  $\text{cm}^{-1}$ ; HRMS (ESI+)  $m/z$  calc'd for  $(\text{M} + \text{H})^+ [\text{C}_{25}\text{H}_{36}\text{O} + \text{H}]^+$ : 353.2839, found 353.2831.

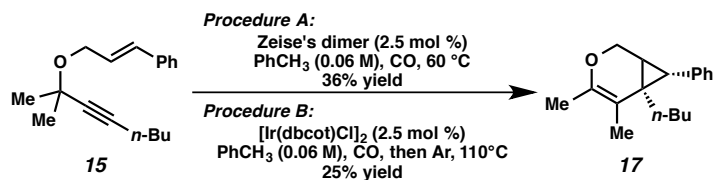

**Bicycle 17. Procedure A:** To a solution of enyne **15** (20.6 mg, 80.3  $\mu$ mol) in toluene (1.2 mL) in a 2-dram vial under argon was quickly added  $[(C_2H_4)PtCl_2]_2$  (1.2 mg, 2.04  $\mu$ mol). CO was bubbled through the solution using a balloon and needle outlet (ca. 30 s). The balloon and outlet were then removed and the solution was stirred at 60 °C for 19.5 h. The reaction was allowed to cool to ambient temperature and was diluted with an approximately equal amount of hexanes. The mixture was stirred for 15 min, then passed through a small plug of  $Al_2O_3$  (hexanes  $\rightarrow$  1:1 hexanes/EtOAc eluent). The solvent was removed by rotary evaporation and the resulting residue was purified by flash chromatography (50:1 hexanes/ $CH_2Cl_2$  w/ 0.5%  $Et_3N$   $\rightarrow$  2:1 hexanes/ $CH_2Cl_2$  w/ 0.5%  $Et_3N$  eluent) affording bicycle **17** (7.5 mg, 36% yield,  $R_f$  = 0.78 in 2:1  $CH_2Cl_2$ /hexanes, stained orange with *p*-anisaldehyde) as a yellow oil.

**Procedure B:** To a solution of enyne **15** (15.6 mg, 60.8  $\mu$ mol) in toluene (0.92 mL) in a 16 x 125 mm glass culture tube under argon was quickly added  $[Ir(dbcot)Cl]_2$  (1.3 mg, 1.50  $\mu$ mol). CO was bubbled through the solution using a balloon and needle outlet (ca. 30 s), during which time the solution turned a dark-blue/black color. The balloon was removed and argon was bubbled through the solution in the same manner. The septum was quickly replaced with a Teflon cap and the solution was stirred at 110 °C for 18 h. The reaction was allowed to cool to ambient temperature and was diluted with an approximately equal amount of hexanes. 1,3-Bis(diphenylphosphino)propane (dppp) (6.2 mg, 15.0  $\mu$ mol) was also added to the mixture. The mixture was stirred for 15 min, then passed through a small plug of  $Al_2O_3$  (hexanes  $\rightarrow$  1:1 hexanes/EtOAc eluent). The solvent was removed by rotary evaporation and the resulting residue was purified by flash chromatography (99:1 hexanes/ $CH_2Cl_2$  w/ 0.5%  $Et_3N$   $\rightarrow$  50:1 hexanes/ $CH_2Cl_2$  w/ 0.5%  $Et_3N$  eluent) affording bicycle **17** (3.9 mg, 25% yield) as a yellow oil.

**Bicycle 17:**  $^1H$  NMR (400 MHz;  $C_6D_6$ ):  $\delta$  7.16 (d,  $J$  = 14.7 Hz, 3H), 7.08-7.06 (m, 2H), 4.10 (dd,  $J$  = 11.0, 5.1 Hz, 1H), 3.80 (dd,  $J$  = 11.0, 3.4 Hz, 1H), 2.17 (d,  $J$  = 5.4 Hz, 1H), 1.79 (d,  $J$  = 0.9 Hz, 3H), 1.70 (d,  $J$  = 0.9 Hz, 3H), 1.65-1.58 (m, 1H), 1.47 (td,  $J$  = 5.3, 3.4 Hz, 1H), 1.36-1.09 (m, 4H), 0.81 (t,  $J$  = 7.3 Hz, 3H), 0.61 (ddd,  $J$  = 14.0, 10.9, 5.9 Hz, 1H);  $^{13}C$  NMR (100 MHz;  $C_6D_6$ ):  $\delta$  146.2, 139.1, 129.4, 126.2, 108.5, 65.4, 38.7, 30.0, 27.2, 25.4, 23.2, 16.8, 14.4, 14.0; IR (film) 2956, 2859, 2017, 1948, 1384, 1150  $cm^{-1}$ ; HRMS (ESI+)  $m/z$  calc'd for  $(M + H)^+$  [ $C_{18}H_{24}O + H$ ] $^+$ : 257.1900, found 257.1888.

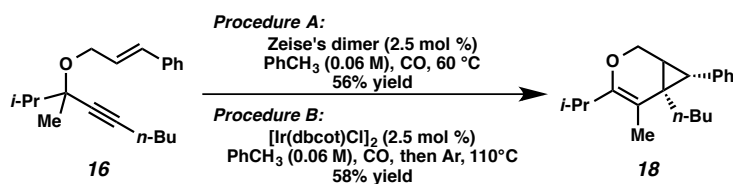

**Bicycle 18. Procedure A:** To a solution of enyne **16** (42.2 mg, 0.148 mmol) in toluene (2.5 mL) in a 2-dram vial under argon was quickly added  $[(C_2H_4)PtCl_2]_2$  (2.2 mg, 3.74  $\mu$ mol). CO was

bubbled through the solution using a balloon and needle outlet (ca. 30 s). The balloon and outlet were then removed and the solution was stirred at 60 °C for 20 h. The reaction was allowed to cool to ambient temperature and was diluted with an approximately equal amount of hexanes. The mixture was stirred for 15 min, then passed through a small plug of Al<sub>2</sub>O<sub>3</sub> (hexanes → 1:1 hexanes/EtOAc eluent). The solvent was removed by rotary evaporation and the resulting residue was purified by flash chromatography (hexanes w/ 0.5% Et<sub>3</sub>N → 9:1 hexanes/CH<sub>2</sub>Cl<sub>2</sub> w/ 0.5% Et<sub>3</sub>N eluent) affording bicycle **18** (23.8 mg, 56% yield, R<sub>f</sub> = 0.78 in 2:1 CH<sub>2</sub>Cl<sub>2</sub>/hexanes, stained orange with *p*-anisaldehyde) as a yellow oil.

**Procedure B:** To a solution of enyne **16** (28.9 mg, 0.102 mmol) in toluene (1.5 mL) in a 16 x 125 mm glass culture tube under argon was quickly added [Ir(dbcot)Cl]<sub>2</sub> (2.2 mg, 2.55 μmol). CO was bubbled through the solution using a balloon and needle outlet (ca. 30 s), during which time the solution turned a dark-blue/black color. The balloon was removed and argon was bubbled through the solution in the same manner. The septum was quickly replaced with a Teflon cap and the solution was stirred at 110 °C for 23 h. The reaction was allowed to cool to ambient temperature and was diluted with an approximately equal amount of hexanes. 1,3-Bis(diphenylphosphino)propane (dppp) (10.3 mg, 25.0 μmol) was also added to the mixture. The mixture was stirred for 15 min, then passed through a small plug of Al<sub>2</sub>O<sub>3</sub> (hexanes → 1:1 hexanes/EtOAc eluent). The solvent was removed by rotary evaporation and the resulting residue was purified by flash chromatography (99:1 hexanes/CH<sub>2</sub>Cl<sub>2</sub> w/ 0.5% Et<sub>3</sub>N → 20:1 hexanes/CH<sub>2</sub>Cl<sub>2</sub> w/ 0.5% Et<sub>3</sub>N eluent) affording bicycle **18** (16.9 mg, 58% yield) as a yellow oil.

**Bicycle 18:** <sup>1</sup>H NMR (400 MHz; C<sub>6</sub>D<sub>6</sub>): δ 7.18-7.14 (m, 2H), 7.08-7.06 (m, 3H), 4.19 (ddd, *J* = 11.1, 5.9, 0.9 Hz, 1H), 3.65 (dd, *J* = 11.1, 4.1 Hz, 1H), 2.80-2.69 (m, 1H), 2.05 (d, *J* = 5.1 Hz, 1H), 1.73 (d, *J* = 1.0 Hz, 3H), 1.65-1.58 (m, 1H), 1.52-1.48 (m, 1H), 1.40-1.21 (m, 4H), 1.18 (dd, *J* = 6.8, 1.1 Hz, 3H), 1.13 (dd, *J* = 6.8, 1.0 Hz, 3H), 0.81 (t, *J* = 7.3 Hz, 3H), 0.64-0.57 (m, 1H); <sup>13</sup>C NMR (100 MHz; C<sub>6</sub>D<sub>6</sub>): δ 154.6, 139.1, 133.7, 129.4, 127.1, 126.2, 107.4, 67.3, 39.2, 30.2, 30.0, 29.8, 29.0, 27.4, 25.0, 23.1, 20.3, 20.2, 14.4, 13.3; IR (film) 2929, 2859, 1454, 1094, 698 cm<sup>-1</sup>; HRMS (ESI+) *m/z* calc'd for (M + H)<sup>+</sup> [C<sub>20</sub>H<sub>28</sub>O + H]<sup>+</sup>: 285.2213, found 285.2201.



## Substrate Synthesis

**General procedure for the alkylation of tertiary propargyl alcohols to give oxygen-tethered 1,6-enyne starting materials.** To a solution of the tertiary propargyl alcohol (1 equiv) in THF (0.20 M) in a flame-dried flask under argon at 0 °C was added NaH (1.2 equiv, 60% dispersion in mineral oil). The solution was allowed to warm to ambient temperature and was stirred until gas evolution was visibly complete. To this suspension was added sequentially 15-crown-5 (0.25 equiv), tetrabutylammonium iodide (1 equiv), and the allylic halide (1 equiv). The resulting mixture was stirred at ambient temperature until completion, as determined by TLC. The reaction was quenched with sat. aq. NH<sub>4</sub>Cl. The layers were separated, and the aqueous layer was extracted with Et<sub>2</sub>O (3x). The combined organic layers were washed with brine, then dried over MgSO<sub>4</sub> and filtered. The solvent was removed by rotary evaporation and the resulting residue was purified by flash chromatography.

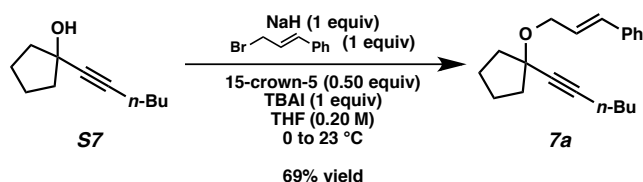

**Enyne 7a.** To a solution of tertiary propargyl alcohol **S7** (0.166 g, 1.00 mmol) in THF (5.0 mL) at 0 °C was added NaH (40.0 mg, 60% dispersion in mineral oil, 1.00 mmol). The solution was allowed to warm to ambient temperature and was stirred until gas evolution was visibly complete. To this suspension was added sequentially 15-crown-5 (99.0 µL, 0.500 mmol), tetrabutylammonium iodide (0.369 g, 1.00 mmol), and cinnamyl bromide (0.197 g, 1.00 mmol). The resulting mixture was stirred at ambient temperature for 16 h. The reaction was quenched with sat. aq. NH<sub>4</sub>Cl (10 mL). The layers were separated, and the aqueous layer was extracted with Et<sub>2</sub>O (3 x 10 mL). The combined organic layers were washed with brine (25 mL), then dried over MgSO<sub>4</sub> and filtered. The solvent was removed by rotary evaporation and the resulting residue was purified by flash chromatography (99:1 hexanes/CH<sub>2</sub>Cl<sub>2</sub> → 2:1 hexanes/CH<sub>2</sub>Cl<sub>2</sub> eluent), affording enyne **7a** (0.195 g, 69% yield, R<sub>f</sub> = 0.67 in 1:1 hexanes/CH<sub>2</sub>Cl<sub>2</sub>, stained blue with *p*-anisidine) as a yellow oil.

**Enyne 7a:** <sup>1</sup>H NMR (400 MHz; CDCl<sub>3</sub>): δ 7.39-7.37 (m, 2H), 7.32-7.28 (m, 2H), 7.24-7.19 (m, 1H), 6.61 (d, *J* = 15.9 Hz, 1H), 6.33 (dt, *J* = 15.9, 6.0 Hz, 1H), 4.23 (dd, *J* = 6.0, 1.5 Hz, 2H), 2.24 (t, *J* = 7.0 Hz, 2H), 2.06-1.99 (m, 2H), 1.92-1.85 (m, 2H), 1.80-1.69 (m, 4H), 1.55-1.40 (m, 4H), 0.92 (d, *J* = 14.5 Hz, 3H); <sup>13</sup>C NMR (100 MHz; CDCl<sub>3</sub>): δ 137.2, 131.6, 128.6, 127.5, 127.3, 126.6, 85.6, 81.7, 80.8, 65.7, 39.9, 31.1, 23.5, 22.1, 18.6, 13.8; IR (film) 2959, 2872,

1496, 1053, 964  $\text{cm}^{-1}$ ; HRMS (ESI+)  $m/z$  calc'd for  $(M + H)^+$   $[\text{C}_{20}\text{H}_{26}\text{O} + \text{H}]^+$ : 283.2056, found 283.2056.

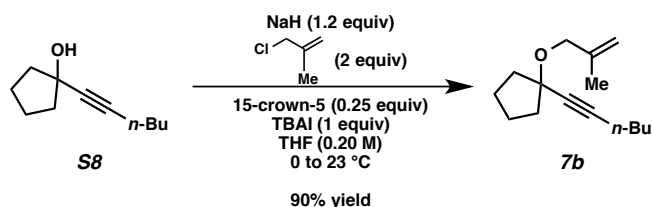

**Enyne 7b.** To a solution of tertiary propargyl alcohol **S8** (0.415 g, 2.49 mmol) in THF (13 mL) at 0 °C was added NaH (0.125 g, 60% dispersion in mineral oil, 3.14 mmol). The solution was allowed to warm to ambient temperature and was stirred until gas evolution was visibly complete. To this suspension was added sequentially 15-crown-5 (0.120 mL, 0.625 mmol), tetrabutylammonium iodide (0.924 g, 2.50 mmol), and methallyl chloride (0.550 mL, 5.57 mmol). The resulting mixture was stirred at ambient temperature for 19.5 h. The reaction was quenched with sat. aq.  $\text{NH}_4\text{Cl}$  (15 mL). The layers were separated, and the aqueous layer was extracted with  $\text{Et}_2\text{O}$  (3 x 15 mL). The combined organic layers were washed with brine (40 mL), then dried over  $\text{MgSO}_4$  and filtered. The solvent was removed by rotary evaporation and the resulting residue was purified by flash chromatography (100% hexanes  $\rightarrow$  5:1 hexanes/ $\text{EtOAc}$  eluent), affording enyne **7b** (0.470 g, 90% yield,  $R_f$  = 0.85 in 1:1 hexanes/ $\text{CH}_2\text{Cl}_2$ , stained blue with *p*-anisaldehyde) as a colorless oil.

**Enyne 7b:**  $^1\text{H}$  NMR (400 MHz;  $\text{CDCl}_3$ ):  $\delta$  4.98 (dd,  $J$  = 2.2, 0.9 Hz, 1H), 4.84 (t,  $J$  = 1.1 Hz, 1H), 3.94 (s, 2H), 2.21 (t,  $J$  = 6.9 Hz, 2H), 2.03-1.96 (m, 2H), 1.88-1.78 (m, 2H), 1.75 (s, 3H), 1.74-1.65 (m, 4H), 1.53-1.38 (m, 4H), 0.91 (t,  $J$  = 7.2 Hz, 3H);  $^{13}\text{C}$  NMR (100 MHz;  $\text{CDCl}_3$ ):  $\delta$  143.3, 111.4, 85.2, 81.8, 80.6, 77.2, 68.7, 39.8, 31.1, 23.5, 22.1, 20.0, 18.6, 13.8; IR (film) 2960, 2873, 1452, 1094  $\text{cm}^{-1}$ ; HRMS (ESI+)  $m/z$  calc'd for  $(M + H)^+$   $[\text{C}_{15}\text{H}_{24}\text{O} + \text{H}]^+$ : 221.1900, found 221.1902.

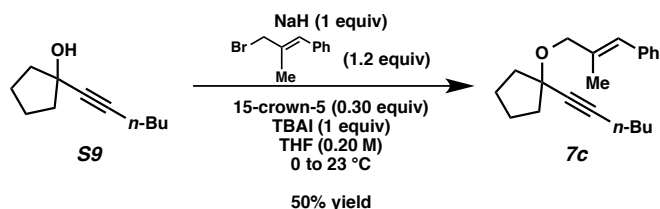

**Enyne 7c.** To a solution of tertiary propargyl alcohol **S9** (0.167 g, 1.00 mmol) in THF (5.0 mL) at 0 °C was added NaH (40.0 mg, 60% dispersion in mineral oil, 1.00 mmol). The solution was allowed to warm to ambient temperature and was stirred until gas evolution was visibly complete. To this suspension was added sequentially 15-crown-5 (60.0  $\mu\text{L}$ , 0.303 mmol),



tetrabutylammonium iodide (0.369 g, 1.00 mmol), and 3-bromo-2-methyl-1-phenyl-1-propene (0.258 g, 1.22 mmol). The resulting mixture was stirred at ambient temperature for 20 h. The reaction was quenched with sat. aq.  $\text{NH}_4\text{Cl}$  (10 mL). The layers were separated, and the aqueous layer was extracted with  $\text{Et}_2\text{O}$  (3 x 10 mL). The combined organic layers were washed with brine (25 mL), then dried over  $\text{MgSO}_4$  and filtered. The solvent was removed by rotary evaporation and the resulting residue was purified by flash chromatography (20:1 hexanes/ $\text{CH}_2\text{Cl}_2 \rightarrow$  1:1 hexanes/ $\text{CH}_2\text{Cl}_2$  eluent), affording enyne **7c** (0.148 g, 50% yield,  $R_f = 0.63$  in 1:1 hexanes/ $\text{CH}_2\text{Cl}_2$ , stained blue with *p*-anisaldehyde) as a colorless oil.

**Enyne 7c:**  $^1\text{H}$  NMR (400 MHz;  $\text{CDCl}_3$ ):  $\delta$  7.34-7.27 (m, 4H), 7.21-7.17 (m, 1H), 6.53 (s, 1H), 4.09 (s, 2H), 2.24 (t,  $J = 6.9$  Hz, 2H), 2.08-2.01 (m, 2H), 1.90 (s, 3H), 1.88-1.84 (m, 2H), 1.82-1.69 (m, 4H), 1.53-1.40 (m, 4H), 0.92 (t,  $J = 7.2$  Hz, 3H);  $^{13}\text{C}$  NMR (100 MHz;  $\text{CDCl}_3$ ):  $\delta$  138.1, 136.2, 129.1, 128.1, 126.3, 126.1, 98.8, 85.4, 81.8, 80.8, 70.9, 39.9, 31.1, 23.5, 22.1, 18.6, 15.9, 13.8; IR (film) 2959, 2872, 1446, 1047  $\text{cm}^{-1}$ ; HRMS (ESI+)  $m/z$  calc'd for  $(\text{M} + \text{H})^+ [\text{C}_{21}\text{H}_{28}\text{O} + \text{H}]^+$ : 297.2213, found 297.2208.

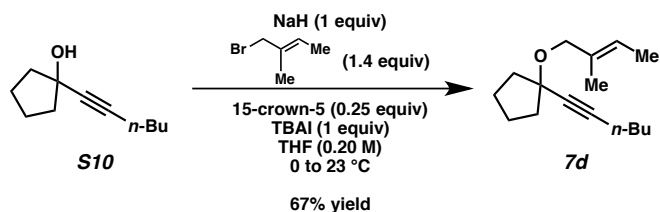

**Enyne 7d.** To a solution of tertiary propargyl alcohol **S10** (0.166 g, 0.996 mmol) in THF (5.0 mL) at 0  $^\circ\text{C}$  was added NaH (40.0 mg, 60% dispersion in mineral oil, 1.00 mmol). The solution was allowed to warm to ambient temperature and was stirred until gas evolution was visibly complete. To this suspension was added sequentially 15-crown-5 (60.0  $\mu\text{L}$ , 0.303 mmol), tetrabutylammonium iodide (0.369 g, 1.00 mmol), and 3-bromo-2-methyl-1-methyl-1-propene (0.208 g, 1.40 mmol). The resulting mixture was stirred at ambient temperature for 16 h. The reaction was quenched with sat. aq.  $\text{NH}_4\text{Cl}$  (10 mL). The layers were separated, and the aqueous layer was extracted with  $\text{Et}_2\text{O}$  (3 x 10 mL). The combined organic layers were washed with brine (40 mL), then dried over  $\text{MgSO}_4$  and filtered. The solvent was removed by rotary evaporation and the resulting residue was purified by flash chromatography (hexanes  $\rightarrow$  1:1 hexanes/ $\text{CH}_2\text{Cl}_2$  eluent), affording enyne **7d** (0.158 g, 67% yield,  $R_f = 0.71$  in 1:1 hexanes/ $\text{CH}_2\text{Cl}_2$ , stained blue with *p*-anisaldehyde) as a colorless oil.

**Enyne 7d:**  $^1\text{H}$  NMR (400 MHz;  $\text{CDCl}_3$ ):  $\delta$  5.51 (dtdd,  $J = 8.3, 5.7, 2.6, 1.3$  Hz, 1H), 3.90 (s, 2H), 2.22 (t,  $J = 6.9$  Hz, 2H), 2.02-1.96 (m, 2H), 1.86-1.78 (m, 2H), 1.76-1.67 (m, 4H), 1.65 (d,  $J = 1.0$  Hz, 3H), 1.61 (dt,  $J = 6.7, 0.9$  Hz, 3H), 1.51-1.39 (m, 4H), 0.91 (t,  $J = 7.2$  Hz, 3H);  $^{13}\text{C}$  NMR (100 MHz;  $\text{CDCl}_3$ ):  $\delta$  133.8, 121.9, 85.1, 82.0, 80.5, 70.9, 39.8, 31.1, 23.4, 22.1, 18.6, 14.0, 13.8,

13.4; IR (film) 2960, 2934, 2861, 1449, 1046  $\text{cm}^{-1}$ ; HRMS (ESI+)  $m/z$  calc'd for  $(\text{M} + \text{H})^+$   $[\text{C}_{16}\text{H}_{26}\text{O} + \text{H}]^+$ : 235.2056, found 235.2050.

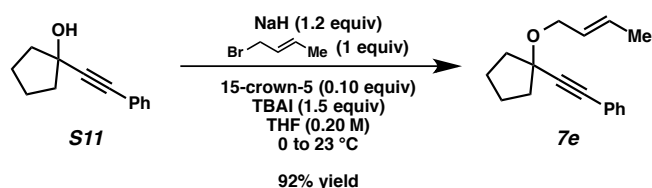

**Enyne 7e.** To a solution of tertiary propargyl alcohol **S11** (0.150 g, 0.805 mmol) in THF (4.0 mL) at 0 °C was added NaH (38.9 mg, 60% dispersion in mineral oil, 0.973 mmol). The solution was allowed to warm to ambient temperature and was stirred until gas evolution was visibly complete. To this suspension was added sequentially 15-crown-5 (16.0  $\mu\text{L}$ , 81.0  $\mu\text{mol}$ ), tetrabutylammonium iodide (0.451 g, 1.22 mmol), and crotyl bromide (83.3  $\mu\text{L}$ , 0.810 mmol). The resulting mixture was stirred at ambient temperature for 24 h. The reaction was quenched with sat. aq.  $\text{NH}_4\text{Cl}$  (10 mL). The layers were separated, and the aqueous layer was extracted with  $\text{Et}_2\text{O}$  (3 x 10 mL). The combined organic layers were washed with brine (30 mL), then dried over  $\text{MgSO}_4$  and filtered. The solvent was removed by rotary evaporation and the resulting residue was purified by flash chromatography (100% hexanes  $\rightarrow$  9:1 hexanes/ $\text{Et}_2\text{O}$  eluent), affording enyne **7e** (0.179 g, 92% yield,  $R_f$  = 0.71 in 4:1 hexanes/ $\text{EtOAc}$ , stained blue with *p*-anisaldehyde) as a colorless oil.

**Enyne 7e:**  $^1\text{H}$  NMR (400 MHz;  $\text{CDCl}_3$ ):  $\delta$  7.43 (td,  $J$  = 3.8, 1.7 Hz, 2H), 7.30 (t,  $J$  = 3.2 Hz, 3H), 5.79-5.60 (m, 2H), 4.08 (d,  $J$  = 6.1 Hz, 2H), 2.13-1.96 (m, 4H), 1.86-1.74 (m, 4H), 1.71 (dd,  $J$  = 6.2, 0.9 Hz, 3H);  $^{13}\text{C}$  NMR (100 MHz;  $\text{CDCl}_3$ ):  $\delta$  131.8, 129.1, 128.36, 128.35, 128.2, 126.6, 91.2, 84.9, 80.8, 66.1, 39.9, 23.6, 18.0; IR (film) 2965, 2857, 1443, 1088  $\text{cm}^{-1}$ ; HRMS (ESI+)  $m/z$  calc'd for  $(\text{M} + \text{H})^+$   $[\text{C}_{17}\text{H}_{20}\text{O} + \text{H}]^+$ : 241.1587, found 241.1587.

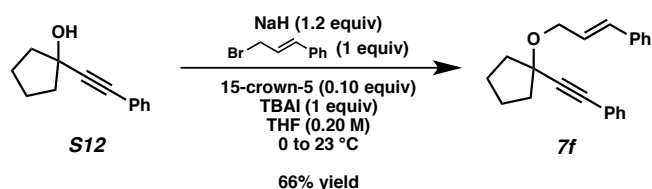

**Enyne 7f.** To a solution of tertiary propargyl alcohol **S12** (0.187 g, 1.00 mmol) in THF (5.0 mL) at 0 °C was added NaH (48.0 mg, 60% dispersion in mineral oil, 1.20 mmol). The solution was allowed to warm to ambient temperature and was stirred until gas evolution was visibly complete. To this suspension was added sequentially 15-crown-5 (20.0  $\mu\text{L}$ , 0.101 mmol), tetrabutylammonium iodide (0.369 g, 1.00 mmol), and cinnamyl bromide (0.198 g, 1.00 mmol). The resulting mixture was stirred at ambient temperature for 20 h. The reaction was quenched

with sat. aq.  $\text{NH}_4\text{Cl}$  (10 mL). The layers were separated, and the aqueous layer was extracted with  $\text{Et}_2\text{O}$  (3 x 10 mL). The combined organic layers were washed with brine (30 mL), then dried over  $\text{MgSO}_4$  and filtered. The solvent was removed by rotary evaporation and the resulting residue was purified by flash chromatography (100% hexanes  $\rightarrow$  1:1 hexanes/ $\text{CH}_2\text{Cl}_2$  eluent), affording enyne **7f** (0.201 g, 66% yield,  $R_f$  = 0.62 in 1:1 hexanes/ $\text{CH}_2\text{Cl}_2$ , stained blue with *p*-anisaldehyde) as a colorless oil.

**Enyne 7f:**  $^1\text{H}$  NMR (400 MHz;  $\text{CDCl}_3$ ):  $\delta$  7.45-7.43 (m, 2H), 7.40-7.38 (m, 2H), 7.30 (dd,  $J$  = 8.5, 5.3 Hz, 5H), 7.24-7.20 (m, 1H), 6.64 (d,  $J$  = 15.9 Hz, 1H), 6.36 (dt,  $J$  = 15.9, 5.9 Hz, 1H), 4.33 (dd,  $J$  = 6.0, 1.5 Hz, 2H), 2.19-2.01 (m, 4H), 1.89-1.76 (m, 4H);  $^{13}\text{C}$  NMR (100 MHz;  $\text{CDCl}_3$ ):  $\delta$  137.2, 131.9, 131.8, 128.6, 128.4, 128.3, 127.6, 127.1, 126.6, 123.2, 91.0, 85.2, 81.1, 66.0, 39.9, 23.6; IR (film) 2965, 1598, 1445, 1048  $\text{cm}^{-1}$ ; HRMS (ESI+)  $m/z$  calc'd for  $(\text{M} + \text{H})^+$  [ $\text{C}_{22}\text{H}_{22}\text{O} + \text{H}$ ] $^+$ : 303.1743, found 303.1743.

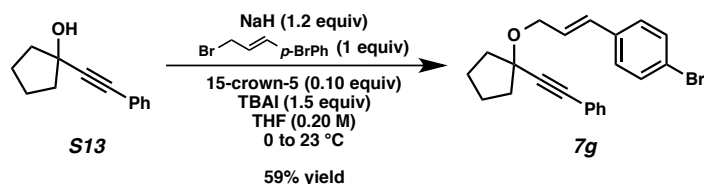

**Enyne 7g.** To a solution of tertiary propargyl alcohol **S13** (0.140 g, 0.750 mmol) in THF (3.8 mL) at 0 °C was added NaH (36.0 mg, 60% dispersion in mineral oil, 0.900 mmol). The solution was allowed to warm to ambient temperature and was stirred until gas evolution was visibly complete. To this suspension was added sequentially 15-crown-5 (15.0  $\mu\text{L}$ , 75.8  $\mu\text{mol}$ ), tetrabutylammonium iodide (0.420 g, 1.14 mmol), and *p*-bromocinnamyl bromide (0.207 g, 0.750 mmol). The resulting mixture was stirred at ambient temperature for 14 h. The reaction was quenched with sat. aq.  $\text{NH}_4\text{Cl}$  (10 mL). The layers were separated, and the aqueous layer was extracted with  $\text{Et}_2\text{O}$  (3 x 10 mL). The combined organic layers were washed with brine (30 mL), then dried over  $\text{MgSO}_4$  and filtered. The solvent was removed by rotary evaporation and the resulting residue was purified by flash chromatography (100% hexanes  $\rightarrow$  1:1 hexanes/ $\text{CH}_2\text{Cl}_2$  eluent), affording enyne **7g** (0.169 g, 59% yield,  $R_f$  = 0.71 in 4:1 hexanes/ $\text{EtOAc}$ , stained blue with *p*-anisaldehyde) as a colorless oil.

**Enyne 7g:**  $^1\text{H}$  NMR (400 MHz;  $\text{CDCl}_3$ ):  $\delta$  7.44-7.41 (m, 4H), 7.31 (t,  $J$  = 3.2 Hz, 3H), 7.24 (d,  $J$  = 8.5 Hz, 2H), 6.58 (d,  $J$  = 15.8 Hz, 1H), 6.35 (dt,  $J$  = 15.8, 5.9 Hz, 1H), 4.31 (dd,  $J$  = 5.8, 1.2 Hz, 2H), 2.17-1.99 (m, 4H), 1.85-1.76 (m, 4H);  $^{13}\text{C}$  NMR (100 MHz;  $\text{CDCl}_3$ ):  $\delta$  136.1, 131.8, 131.7, 128.4, 128.3, 128.1, 128.0, 98.8, 77.4, 77.0, 69.9, 39.9, 23.6; IR (film) 2965, 1488, 1071  $\text{cm}^{-1}$ ; HRMS (ESI+)  $m/z$  calc'd for  $(\text{M} + \text{H})^+$  [ $\text{C}_{22}\text{H}_{21}\text{BrO} + \text{H}$ ] $^+$ : 381.0849, found 381.0844.

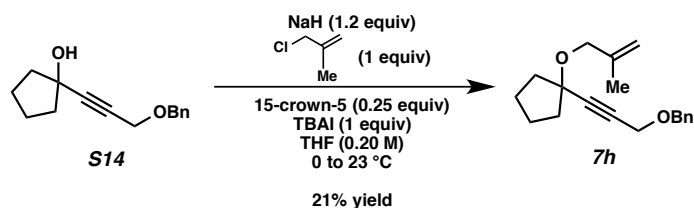

**Enyne 7h.** To a solution of tertiary propargyl alcohol **S14** (0.150 g, 0.652 mmol) in THF (3.3 mL) at 0 °C was added NaH (31.2 mg, 60% dispersion in mineral oil, 0.780 mmol). The solution was allowed to warm to ambient temperature and was stirred until gas evolution was visibly complete. To this suspension was added sequentially 15-crown-5 (32.0  $\mu$ L, 0.163 mmol), tetrabutylammonium iodide (0.240 g, 0.650 mmol), and methallyl chloride (64.2  $\mu$ L, 0.650 mmol). The resulting mixture was stirred at ambient temperature for 22 h. The reaction was quenched with sat. aq.  $\text{NH}_4\text{Cl}$  (10 mL). The layers were separated, and the aqueous layer was extracted with  $\text{Et}_2\text{O}$  (3 x 10 mL). The combined organic layers were washed with brine (30 mL), then dried over  $\text{MgSO}_4$  and filtered. The solvent was removed by rotary evaporation and the resulting residue was purified by flash chromatography (100% hexanes  $\rightarrow$  10:1 hexanes/ $\text{EtOAc}$  eluent), affording enyne **7h** (38.3 mg, 21% yield,  $R_f$  = 0.81 in 3:1 hexanes/ $\text{EtOAc}$ , stained blue with *p*-anisaldehyde) as a colorless oil.

**Enyne 7h:**  $^1\text{H}$  NMR (400 MHz;  $\text{CDCl}_3$ ):  $\delta$  7.36 (d,  $J$  = 4.4 Hz, 4H), 7.31 (td,  $J$  = 6.6, 3.7 Hz, 1H), 5.00 (s, 1H), 4.86 (s, 1H), 4.61 (s, 2H), 4.23 (s, 2H), 3.97 (s, 2H), 2.06 (td,  $J$  = 10.8, 4.4 Hz, 2H), 1.95–1.88 (m, 2H), 1.81–1.70 (m, 7H);  $^{13}\text{C}$  NMR (100 MHz;  $\text{CDCl}_3$ ):  $\delta$  143.0, 137.6, 128.6, 128.2, 128.0, 111.5, 88.5, 80.6, 80.5, 71.5, 68.9, 57.6, 39.7, 23.5, 20.0; IR (film) 2969, 2856, 1496, 1091  $\text{cm}^{-1}$ ; HRMS (ESI $^+$ )  $m/z$  calc'd for  $(\text{M} + \text{H})^+$  [ $\text{C}_{19}\text{H}_{24}\text{O}_2 + \text{H}$ ] $^+$ : 285.1849, found 285.1851.

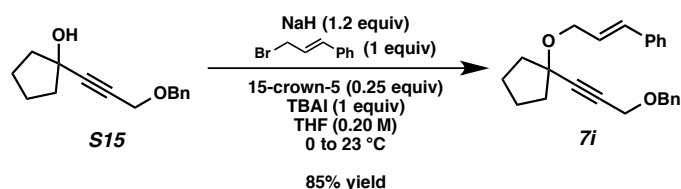

**Enyne 7i.** To a solution of tertiary propargyl alcohol **S15** (0.172 g, 0.749 mmol) in THF (3.8 mL) at 0 °C was added NaH (36.0 mg, 60% dispersion in mineral oil, 0.900 mmol). The solution was allowed to warm to ambient temperature and was stirred until gas evolution was visibly complete. To this suspension was added sequentially 15-crown-5 (37.6  $\mu$ L, 0.190 mmol), tetrabutylammonium iodide (0.280 g, 0.758 mmol), and cinnamyl bromide (0.147 g, 0.746 mmol). The resulting mixture was stirred at ambient temperature for 22 h. The reaction was quenched with sat. aq.  $\text{NH}_4\text{Cl}$  (10 mL). The layers were separated, and the aqueous layer was extracted with  $\text{Et}_2\text{O}$  (3 x 10 mL). The combined organic layers were washed with brine (30 mL),

then dried over  $\text{MgSO}_4$  and filtered. The solvent was removed by rotary evaporation and the resulting residue was purified by flash chromatography (100% hexanes  $\rightarrow$  9:1 hexanes/EtOAc eluent), affording enyne **7i** (0.221 g, 85% yield,  $R_f$  = 0.77 (3:1 hexanes/EtOAc), stained blue with *p*-anisaldehyde) as a colorless oil.

**Enyne 7i:**  $^1\text{H}$ -NMR (400 MHz;  $\text{CDCl}_3$ ):  $\delta$  7.39-7.34 (m, 5H), 7.31 (t,  $J$  = 7.5 Hz, 3H), 7.23 (dd,  $J$  = 8.3, 6.1 Hz, 2H), 6.63 (d,  $J$  = 15.9 Hz, 1H), 6.33 (dt,  $J$  = 15.9, 5.9 Hz, 1H), 4.62 (s, 2H), 4.27-4.26 (m, 4H), 2.12-2.05 (m, 2H), 2.00-1.92 (m, 2H), 1.84-1.72 (m, 4H);  $^{13}\text{C}$  NMR (100 MHz;  $\text{CDCl}_3$ ):  $\delta$  137.6, 137.1, 131.8, 128.6, 128.2, 128.0, 127.6, 126.9, 126.6, 88.4, 80.9, 80.6, 71.6, 65.9, 57.7, 39.8, 23.5; IR (film) 2963, 2856, 1496, 1073  $\text{cm}^{-1}$ ; HRMS (ESI+)  $m/z$  calc'd for  $(\text{M} + \text{H})^+ [\text{C}_{24}\text{H}_{26}\text{O}_2 + \text{H}]^+$ : 347.2006, found 347.2011.

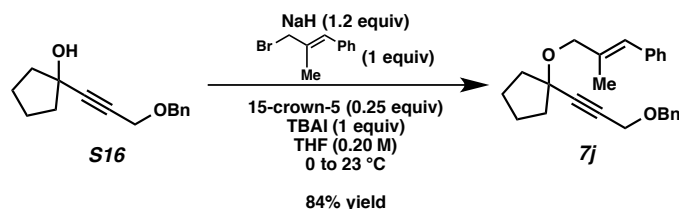

**Enyne 7j.** To a solution of tertiary propargyl alcohol **S16** (0.110 g, 0.475 mmol) in THF (2.4 mL) at 0 °C was added NaH (23.0 g, 60% dispersion in mineral oil, 0.571 mmol). The solution was allowed to warm to ambient temperature and was stirred until gas evolution was visibly complete. To this suspension was added sequentially 15-crown-5 (23.8  $\mu\text{L}$ , 0.120 mmol), tetrabutylammonium iodide (0.175 g, 0.475 mmol), and 3-bromo-2-methyl-1-phenyl-1-propene (0.101 g, 0.475 mmol). The resulting mixture was stirred at ambient temperature for 15 h. The reaction was quenched with sat. aq.  $\text{NH}_4\text{Cl}$  (10 mL). The layers were separated, and the aqueous layer was extracted with  $\text{Et}_2\text{O}$  (3 x 10 mL). The combined organic layers were washed with brine (30 mL), then dried over  $\text{MgSO}_4$  and filtered. The solvent was removed by rotary evaporation and the resulting residue was purified by flash chromatography (100% hexanes  $\rightarrow$  1:1 hexanes/ $\text{CH}_2\text{Cl}_2$  eluent), affording enyne **7j** (0.144 g, 84% yield,  $R_f$  = 0.55 in 1:1 hexanes/ $\text{CH}_2\text{Cl}_2$ , stained blue with *p*-anisaldehyde) as a colorless oil.

**Enyne 7j:**  $^1\text{H}$  NMR (400 MHz;  $\text{CDCl}_3$ ):  $\delta$  7.35 (dd,  $J$  = 6.0, 4.0 Hz, 3H), 7.30 (dt,  $J$  = 12.7, 6.1 Hz, 5H), 7.22-7.18 (m, 1H), 6.54 (s, 1H), 4.62 (s, 2H), 4.25 (s, 2H), 4.12 (s, 2H), 2.14-1.92 (m, 4H), 1.92 (s, 3H), 1.84-1.72 (m, 4H);  $^{13}\text{C}$  NMR (100 MHz;  $\text{CDCl}_3$ ):  $\delta$  138.0, 137.6, 135.9, 129.1, 128.6, 128.3, 128.2, 128.0, 126.4, 126.3, 88.5, 80.8, 80.6, 71.6, 71.2, 57.6, 39.8, 23.5, 15.9; IR (film) 2964, 2855, 1683, 1493, 1089  $\text{cm}^{-1}$ ; HRMS (ESI+)  $m/z$  calc'd for  $(\text{M} + \text{H})^+ [\text{C}_{25}\text{H}_{28}\text{O}_2 + \text{H}]^+$ : 361.2162, found 361.2162.

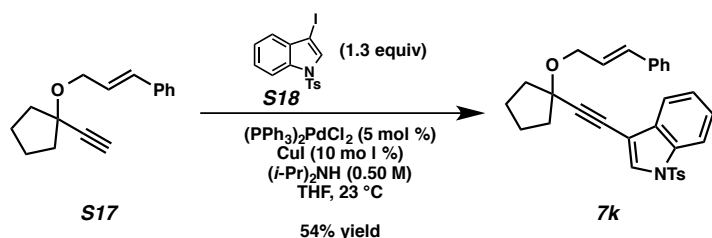

**Enyne 7k.** To  $(\text{PPh}_3)_2\text{PdCl}_2$  (52.7 mg, 75.1  $\mu\text{mol}$ ) and CuI (28.6 mg, 0.150 mmol) under argon was added  $(i\text{-Pr})_2\text{NH}$  (3.0 mL). The mixture was stirred for 5 min, then 2-iodoindole **S18** (0.775 g, 1.95 mmol) was added and the mixture was stirred for 5 more min. Terminal alkyne **S17** (0.339 g, 1.50 mmol) was then added as a 0.50 M solution in THF. Additional THF (ca. 3.0 mL) was added to maintain dissolution. The mixture was stirred for 14 h, after which the reaction mixture was partitioned between 1 M HCl (10 mL) and  $\text{Et}_2\text{O}$  (5.0 mL). The layers were separated and the aqueous layer was extracted with  $\text{Et}_2\text{O}$  (3 x 5.0 mL). The combined organic layers were washed with brine (20 mL), then dried over  $\text{MgSO}_4$  and filtered. The solvent was removed by rotary evaporation and the resulting residue was purified by flash chromatography (100% hexanes  $\rightarrow$  9:1 hexanes/ $\text{EtOAc}$  eluent), affording enyne **7k** (0.406 g, 54% yield,  $R_f$  = 0.33 in 9:1 hexanes/ $\text{EtOAc}$ , stained blue with *p*-anisaldehyde) as a brown amorphous solid.

**Enyne 7k:**  $^1\text{H}$  NMR (400 MHz;  $\text{CDCl}_3$ ):  $\delta$  7.97 (d,  $J$  = 8.3 Hz, 1H), 7.79 (d,  $J$  = 8.3 Hz, 2H), 7.72 (s, 1H), 7.61 (d,  $J$  = 7.7 Hz, 1H), 7.38 (t,  $J$  = 8.2 Hz, 3H), 7.34-7.28 (m, 3H), 7.23 (t,  $J$  = 8.3 Hz, 3H), 6.65 (d,  $J$  = 16.1 Hz, 1H), 6.40-6.33 (m, 1H), 4.36-4.34 (m, 2H), 2.35 (s, 3H), 2.22-2.04 (m, 4H), 1.90-1.78 (m, 4H);  $^{13}\text{C}$  NMR (100 MHz;  $\text{CDCl}_3$ ):  $\delta$  145.4, 135.1, 134.3, 131.9, 130.2, 128.8, 128.6, 127.7, 127.1, 127.0, 126.6, 125.6, 123.8, 120.6, 113.7, 95.5, 81.2, 77.4, 66.1, 40.1, 23.6, 21.7; IR (film) 2966, 1376, 1175, 964  $\text{cm}^{-1}$ ; HRMS (ESI+)  $m/z$  calc'd for  $(\text{M} + \text{H})^+$  [ $\text{C}_{31}\text{H}_{29}\text{NO}_3\text{S} + \text{H}$ ] $^+$ : 496.1941, found 496.1960.

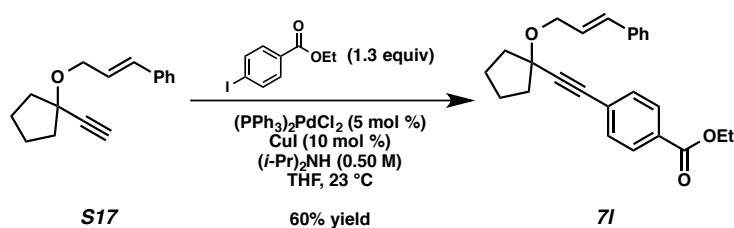

**Enyne 7l.** To  $(\text{PPh}_3)_2\text{PdCl}_2$  (52.7 mg, 75.1  $\mu\text{mol}$ ) and CuI (28.6 mg, 0.150 mmol) under argon was added  $(i\text{-Pr})_2\text{NH}$  (3.0 mL). The mixture was stirred for 5 min, then 4-iodoethylbenzoate (0.330 mL, 1.95 mmol) was added and the mixture was stirred for 5 min. Terminal alkyne **S17** (0.339 g, 1.50 mmol) was then added as a 0.50 M solution in THF. Additional THF (ca. 3.0 mL) was added to maintain dissolution. The mixture was stirred for 14 h, after which the reaction mixture was partitioned between 1 M HCl (10 mL) and  $\text{Et}_2\text{O}$  (5.0 mL). The layers were



separated and the aqueous layer was extracted with Et<sub>2</sub>O (3 x 5.0 mL). The combined organic layers were washed with brine (20 mL), then dried over MgSO<sub>4</sub> and filtered. The solvent was removed by rotary evaporation and the resulting residue was purified by flash chromatography (100% hexanes → 9:1 hexanes/EtOAc eluent), affording enyne **7I** (0.338 g, 60% yield, *R*<sub>f</sub> = 0.42 in 9:1 hexanes/EtOAc, stained blue with *p*-anisaldehyde) as a colorless oil.

**Enyne 7I:** <sup>1</sup>H NMR (400 MHz; CDCl<sub>3</sub>): δ 7.99-7.97 (m, 2H), 7.50-7.48 (m, 2H), 7.40-7.38 (m, 2H), 7.30 (dd, *J* = 8.1, 6.7 Hz, 2H), 7.24-7.20 (m, 1H), 6.63 (t, *J* = 14.3 Hz, 1H), 6.39-6.27 (m, 1H), 4.38 (q, *J* = 7.1 Hz, 2H), 4.32 (dd, *J* = 5.9, 1.4 Hz, 1H), 2.20-2.01 (m, 4H), 1.88-1.75 (m, 4H), 1.40 (d, *J* = 14.3 Hz, 3H); <sup>13</sup>C NMR (100 MHz; CDCl<sub>3</sub>): δ 131.9, 131.7, 129.5, 128.6, 127.7, 126.6, 94.2, 84.6, 81.0, 66.1, 61.3, 39.9, 23.6, 14.5; IR (film) 2965, 1719, 1272, 1106 cm<sup>-1</sup>; HRMS (ESI+) *m/z* calc'd for (M + H)<sup>+</sup> [C<sub>25</sub>H<sub>26</sub>O<sub>3</sub> + H]<sup>+</sup>: 375.1955, found 375.1935.

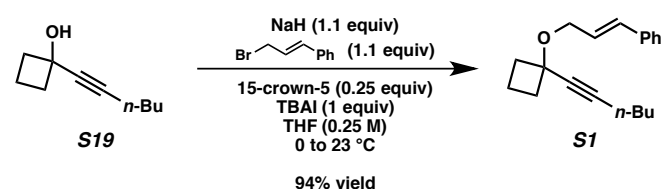

**Enyne S1.** To a solution of tertiary propargyl alcohol **S19** (0.378 g, 2.48 mmol) in THF (10 mL) at 0 °C was added NaH (0.111 g, 60% dispersion in mineral oil, 2.75 mmol). The solution was allowed to warm to ambient temperature and was stirred until gas evolution was visibly complete. To this suspension was added sequentially 15-crown-5 (0.120 mL, 0.625 mmol), tetrabutylammonium iodide (0.646 g, 1.75 mmol), and cinnamyl bromide (0.542 g, 2.75 mmol). The resulting mixture was stirred at ambient temperature for 19 h. The reaction was quenched with sat. aq. NH<sub>4</sub>Cl (15 mL). The layers were separated, and the aqueous layer was extracted with Et<sub>2</sub>O (3 x 10 mL). The combined organic layers were washed with brine (20 mL), then dried over MgSO<sub>4</sub> and filtered. The solvent was removed by rotary evaporation and the resulting residue was purified by flash chromatography (100% hexanes → 9:1 hexanes/EtOAc eluent), affording enyne **S1** (0.629 g, 94% yield, *R*<sub>f</sub> = 0.58 in 9:1 hexanes/EtOAc, stained blue with *p*-anisaldehyde) as a colorless oil.

**Enyne S1:** <sup>1</sup>H NMR (400 MHz; CDCl<sub>3</sub>): δ 7.40-7.38 (m, 2H), 7.30 (t, *J* = 7.6 Hz, 2H), 7.24-7.20 (m, 1H), 6.63 (d, *J* = 15.9 Hz, 1H), 6.33 (dt, *J* = 15.9, 6.1 Hz, 1H), 4.17 (dd, *J* = 6.1, 1.2 Hz, 2H), 2.35-2.24 (m, 6H), 1.93-1.78 (m, 2H), 1.57-1.40 (m, 4H), 0.93 (t, *J* = 7.2 Hz, 3H); <sup>13</sup>C NMR (100 MHz; CDCl<sub>3</sub>): δ 137.1, 132.2, 128.6, 127.6, 126.7, 126.6, 85.8, 81.6, 73.1, 65.3, 36.5, 31.1, 22.1, 18.7, 13.8, 13.5; IR (film) 2935, 2861, 1450, 1128, 735 cm<sup>-1</sup>; HRMS (ESI+) *m/z* calc'd for (M + H)<sup>+</sup> [C<sub>19</sub>H<sub>24</sub>O + H]<sup>+</sup>: 269.1900, found 269.1901.

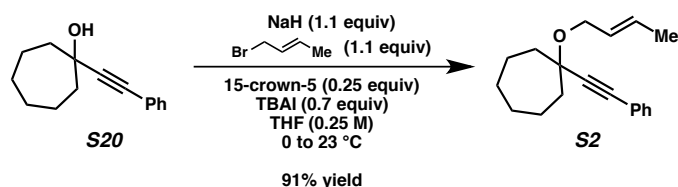

**Enyne S2.** To a solution of tertiary propargyl alcohol **S20** (2.14 g, 10.0 mmol) in THF (40 mL) at 0 °C was added NaH (0.442 g, 60% dispersion in mineral oil, 11.1 mmol). The solution was allowed to warm to ambient temperature and was stirred until gas evolution was visibly complete. To this suspension was added sequentially 15-crown-5 (0.495 mL, 2.50 mmol), tetrabutylammonium iodide (2.58 g, 6.98 mmol), and crotyl bromide (1.13 mL, 11.0 mmol). The resulting mixture was stirred at ambient temperature for 19 h. The reaction was quenched with sat. aq.  $\text{NH}_4\text{Cl}$  (50 mL). The layers were separated, and the aqueous layer was extracted with  $\text{Et}_2\text{O}$  (3 x 40 mL). The combined organic layers were washed with brine (100 mL), then dried over  $\text{MgSO}_4$  and filtered. The solvent was removed by rotary evaporation and the resulting residue was purified by flash chromatography (100% hexanes  $\rightarrow$  9:1 hexanes/ $\text{EtOAc}$  eluent), affording enyne **S2** (2.44 g, 91% yield,  $R_f = 0.75$  in 9:1 hexanes/ $\text{EtOAc}$ , stained blue with *p*-anisaldehyde) as a colorless oil.

**Enyne S2:**  $^1\text{H}$  NMR (400 MHz;  $\text{CDCl}_3$ ):  $\delta$  7.44-7.42 (m, 2H), 7.30 (t,  $J = 3.3$  Hz, 3H), 5.79-5.60 (m, 2H), 4.10 (d,  $J = 6.0$  Hz, 2H), 2.09 (dd,  $J = 13.9, 8.0$  Hz, 2H), 1.98-1.92 (m, 2H), 1.71 (d,  $J = 6.2$  Hz, 3H), 1.69-1.56 (m, 8H);  $^{13}\text{C}$  NMR (100 MHz;  $\text{CDCl}_3$ ):  $\delta$  131.8, 128.8, 128.6, 128.4, 128.2, 123.3, 98.9, 92.0, 77.5, 65.0, 40.3, 28.5, 22.3, 18.0; IR (film) 2929, 2856, 1444, 1041, 755  $\text{cm}^{-1}$ ; HRMS (ESI+)  $m/z$  calc'd for  $(\text{M} + \text{H})^+ [\text{C}_{19}\text{H}_{24}\text{O} + \text{H}]^+$ : 269.1900, found 269.1900.

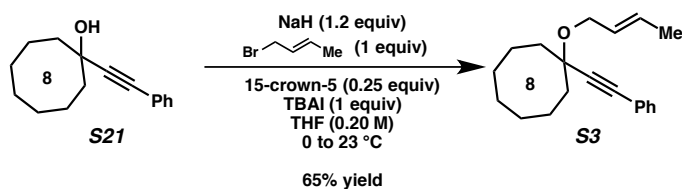

**Enyne S3.** To a solution of tertiary propargyl alcohol **S21** (0.505 g, 2.21 mmol) in THF (11 mL) at 0 °C was added NaH (0.104 g, 60% dispersion in mineral oil, 2.60 mmol). The solution was allowed to warm to ambient temperature and was stirred until gas evolution was visibly complete. To this suspension was added sequentially 15-crown-5 (43.5  $\mu\text{L}$ , 0.220 mmol), tetrabutylammonium iodide (0.815 g, 2.21 mmol), and crotyl bromide (0.235 mL, 2.28 mmol). The resulting mixture was stirred at ambient temperature for 18 h. The reaction was quenched with sat. aq.  $\text{NH}_4\text{Cl}$  (15 mL). The layers were separated, and the aqueous layer was extracted with  $\text{Et}_2\text{O}$  (3 x 10 mL). The combined organic layers were washed with brine (30 mL), then dried over  $\text{MgSO}_4$  and filtered. The solvent was removed by rotary evaporation and the resulting



residue was purified by flash chromatography (hexanes  $\rightarrow$  4:1 hexanes/Et<sub>2</sub>O eluent), affording enyne **S3** (0.406 g, 65% yield,  $R_f$  = 0.79 in 4:1 hexanes/EtOAc, stained blue with *p*-anisaldehyde) as a colorless oil.

**Enyne S3:** <sup>1</sup>H NMR (400 MHz; CDCl<sub>3</sub>):  $\delta$  7.44-7.41 (m, 2H), 7.30 (t,  $J$  = 3.2 Hz, 3H), 5.78-5.60 (m, 2H), 4.08 (d,  $J$  = 6.0 Hz, 2H), 2.10-1.95 (m, 4H), 1.71 (dd,  $J$  = 6.2, 0.9 Hz, 3H), 1.68-1.56 (m, 10H); <sup>13</sup>C NMR (100 MHz; CDCl<sub>3</sub>):  $\delta$  131.8, 128.7, 128.6, 128.4, 128.2, 123.3, 91.9, 85.2, 77.3, 64.8, 35.1, 28.2, 24.7, 21.9, 18.0; IR (film) 2923, 2855, 1444, 1038, 755 cm<sup>-1</sup>; HRMS (ESI+)  $m/z$  calc'd for (M + H)<sup>+</sup> [C<sub>20</sub>H<sub>26</sub>O + H]<sup>+</sup>: 283.2056, found 283.2053.

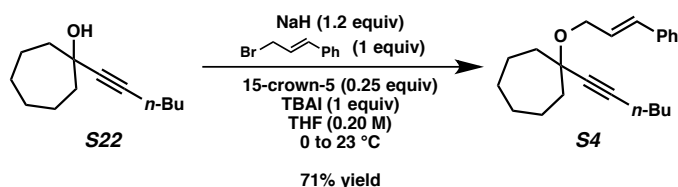

**Enyne S4.** To a solution of tertiary propargyl alcohol **S22** (0.194 g, 0.999 mmol) in THF (5.0 mL) at 0 °C was added NaH (48.0 mg, 60% dispersion in mineral oil, 1.20 mmol). The solution was allowed to warm to ambient temperature and was stirred until gas evolution was visibly complete. To this suspension was added sequentially 15-crown-5 (49.5  $\mu$ L, 0.250 mmol), tetrabutylammonium iodide (0.369 g, 1.00 mmol), and cinnamyl bromide (0.197 g, 1.00 mmol). The resulting mixture was stirred at ambient temperature for 14 h. The reaction was quenched with sat. aq. NH<sub>4</sub>Cl (10 mL). The layers were separated, and the aqueous layer was extracted with Et<sub>2</sub>O (3 x 10 mL). The combined organic layers were washed with brine (20 mL), then dried over MgSO<sub>4</sub> and filtered. The solvent was removed by rotary evaporation and the resulting residue was purified by flash chromatography (100% hexanes  $\rightarrow$  1:1 hexanes/CH<sub>2</sub>Cl<sub>2</sub> eluent), affording enyne **S4** (0.220 g, 71% yield,  $R_f$  = 0.82 in 2:1 CH<sub>2</sub>Cl<sub>2</sub>/hexanes, stained blue with *p*-anisaldehyde) as a yellow oil.

**Enyne S4:** <sup>1</sup>H NMR (400 MHz; CDCl<sub>3</sub>):  $\delta$  7.38 (d,  $J$  = 7.5 Hz, 2H), 7.30 (t,  $J$  = 7.6 Hz, 2H), 7.21 (dd,  $J$  = 8.2, 6.3 Hz, 1H), 6.61 (d,  $J$  = 16.0 Hz, 1H), 6.33 (dt,  $J$  = 15.8, 5.9 Hz, 1H), 4.25 (dd,  $J$  = 5.9, 1.1 Hz, 2H), 2.24 (t,  $J$  = 6.9 Hz, 2H), 2.01-1.85 (m, 4H), 1.70-1.39 (m, 12H), 0.92 (t,  $J$  = 7.2 Hz, 3H); <sup>13</sup>C NMR (100 MHz; CDCl<sub>3</sub>):  $\delta$  137.3, 131.3, 128.6, 127.7, 127.5, 126.6, 86.0, 82.6, 77.6, 64.6, 40.6, 31.1, 28.5, 22.2, 22.1, 18.6, 13.8; IR (film) 2932, 2859, 1496, 1058, 964 cm<sup>-1</sup>; HRMS (ESI+)  $m/z$  calc'd for (M + H)<sup>+</sup> [C<sub>22</sub>H<sub>30</sub>O + H]<sup>+</sup>: 311.2369, found 311.2362.

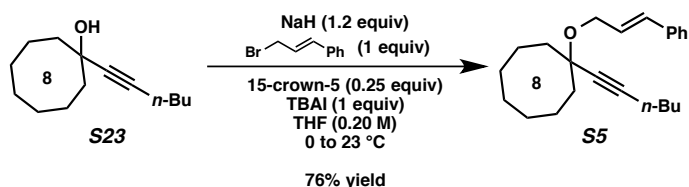

**Enyne S5.** To a solution of tertiary propargyl alcohol **S23** (0.209 g, 1.00 mmol) in THF (5.0 mL) at 0 °C was added NaH (48.0 g, 60% dispersion in mineral oil, 1.20 mmol). The solution was allowed to warm to ambient temperature and was stirred until gas evolution was visibly complete. To this suspension was added sequentially 15-crown-5 (49.5  $\mu$ L, 0.250 mmol), tetrabutylammonium iodide (0.369 g, 1.00 mmol), and cinnamyl bromide (0.197 g, 1.00 mmol). The resulting mixture was stirred at ambient temperature for 14 h. The reaction was quenched with sat. aq.  $\text{NH}_4\text{Cl}$  (10 mL). The layers were separated, and the aqueous layer was extracted with  $\text{Et}_2\text{O}$  (3 x 10 mL). The combined organic layers were washed with brine (20 mL), then dried over  $\text{MgSO}_4$  and filtered. The solvent was removed by rotary evaporation and the resulting residue was purified by flash chromatography (100% hexanes  $\rightarrow$  1:1 hexanes/ $\text{CH}_2\text{Cl}_2$  eluent), affording enyne **S5** (0.247 g, 76% yield,  $R_f$  = 0.86 in 2:1  $\text{CH}_2\text{Cl}_2$ /hexanes, stained blue with *p*-anisaldehyde) as a yellow oil.

**Enyne S5:**  $^1\text{H}$  NMR (400 MHz;  $\text{CDCl}_3$ ):  $\delta$  7.39-7.37 (m, 2H), 7.31-7.27 (m, 2H), 7.23-7.19 (m, 1H), 6.60 (d,  $J$  = 15.9 Hz, 1H), 6.32 (dt,  $J$  = 15.9, 5.9 Hz, 1H), 4.23 (dd,  $J$  = 5.9, 1.5 Hz, 2H), 2.23 (t,  $J$  = 6.9 Hz, 2H), 2.03-1.84 (m, 4H), 1.69-1.40 (m, 14H), 0.92 (t,  $J$  = 7.2 Hz, 3H);  $^{13}\text{C}$  NMR (100 MHz;  $\text{CDCl}_3$ ):  $\delta$  137.3, 131.3, 128.6, 127.4, 126.6, 98.9, 85.7, 82.4, 64.4, 35.3, 31.1, 28.3, 24.7, 22.1, 21.9, 18.5, 13.8; IR (film) 2927, 2857, 1496, 1111, 963  $\text{cm}^{-1}$ ; HRMS (ESI+)  $m/z$  calc'd for  $(\text{M} + \text{H})^+$  [ $\text{C}_{23}\text{H}_{32}\text{O} + \text{H}$ ] $^+$ : 325.2526, found 325.2517.

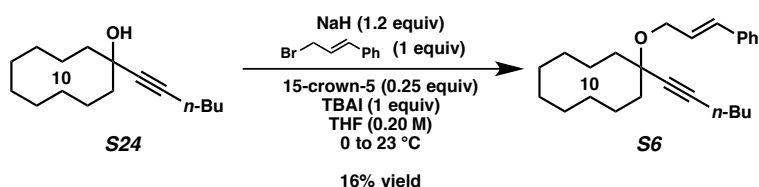

**Enyne S6.** To a solution of tertiary propargyl alcohol **S24** (0.298 g, 1.26 mmol) in THF (6.3 mL) at 0 °C was added NaH (60.4 mg, 60% dispersion in mineral oil, 1.51 mmol). The solution was allowed to warm to ambient temperature and was stirred until gas evolution was visibly complete. To this suspension was added sequentially 15-crown-5 (63.3  $\mu$ L, 0.320 mmol), tetrabutylammonium iodide (0.465 g, 1.26 mmol), and cinnamyl bromide (0.249 g, 1.26 mmol). The resulting mixture was stirred at ambient temperature for 14 h. The reaction was quenched with sat. aq.  $\text{NH}_4\text{Cl}$  (15 mL). The layers were separated, and the aqueous layer was extracted with  $\text{Et}_2\text{O}$  (3 x 15 mL). The combined organic layers were washed with brine (30 mL), then

dried over  $\text{MgSO}_4$  and filtered. The solvent was removed by rotary evaporation and the resulting residue was purified by flash chromatography (10:1 hexanes/ $\text{CH}_2\text{Cl}_2 \rightarrow$  1:1 hexanes/ $\text{CH}_2\text{Cl}_2$  eluent), affording enyne **S6** (72.7 mg, 16% yield,  $R_f = 0.89$  in 2:1  $\text{CH}_2\text{Cl}_2$ /hexanes, stained blue with *p*-anisaldehyde) as a yellow oil.

**Enyne S6:**  $^1\text{H}$  NMR (400 MHz;  $\text{CDCl}_3$ ):  $\delta$  7.39-7.37 (m, 2H), 7.31-7.27 (m, 2H), 7.23-7.19 (m, 1H), 6.60 (d,  $J = 15.9$  Hz, 1H), 6.33 (dt,  $J = 15.9, 5.9$  Hz, 1H), 4.23 (dd,  $J = 5.9, 1.4$  Hz, 2H), 2.23 (t,  $J = 6.9$  Hz, 2H), 2.04-1.97 (m, 2H), 1.82 (dt,  $J = 14.2, 6.9$  Hz, 2H), 1.71-1.38 (m, 18H), 0.92 (t,  $J = 7.2$  Hz, 3H);  $^{13}\text{C}$  NMR (100 MHz;  $\text{CDCl}_3$ ):  $\delta$  137.3, 131.5, 128.6, 127.5, 126.6, 86.1, 82.0, 77.7, 64.3, 33.3, 31.2, 26.5, 26.0, 23.9, 22.1, 21.4, 18.5, 13.8; IR (film) 2924, 1446, 1054,  $962\text{ cm}^{-1}$ ; HRMS (ESI+)  $m/z$  calc'd for  $(\text{M} + \text{H})^+ [\text{C}_{25}\text{H}_{36}\text{O} + \text{H}]^+$ : 353.2839, found 353.2828.

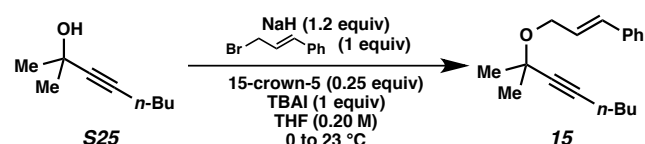

**Enyne 15.** To a solution of tertiary propargyl alcohol **S25** (0.140 g, 0.998 mmol) in THF (5.0 mL) at  $0\text{ }^\circ\text{C}$  was added NaH (48.0 mg, 60% dispersion in mineral oil, 1.20 mmol). The solution was allowed to warm to ambient temperature and was stirred until gas evolution was visibly complete. To this suspension was added sequentially 15-crown-5 (49.5  $\mu\text{L}$ , 0.250 mmol), tetrabutylammonium iodide (0.369 g, 1.00 mmol), and cinnamyl bromide (0.197 g, 1.00 mmol). The resulting mixture was stirred at ambient temperature for 19 h. The reaction was quenched with sat. aq.  $\text{NH}_4\text{Cl}$  (10 mL). The layers were separated, and the aqueous layer was extracted with  $\text{Et}_2\text{O}$  (3 x 10 mL). The combined organic layers were washed with brine (25 mL), then dried over  $\text{MgSO}_4$  and filtered. The solvent was removed by rotary evaporation and the resulting residue was purified by flash chromatography (hexanes  $\rightarrow$  1:1 hexanes/ $\text{CH}_2\text{Cl}_2 \rightarrow$  1:1:1 hexanes/ $\text{CH}_2\text{Cl}_2$ / $\text{EtOAc}$  eluent), affording enyne **15** (0.183 g, 69% yield,  $R_f = 0.71$  in 2:1  $\text{CH}_2\text{Cl}_2$ /hexanes, stained blue with *p*-anisaldehyde) as a colorless oil.

**Enyne 15:**  $^1\text{H}$  NMR (400 MHz;  $\text{CDCl}_3$ ):  $\delta$  7.40-7.38 (m, 2H), 7.30 (dd,  $J = 8.2, 6.8$  Hz, 2H), 7.24-7.22 (m, 1H), 6.62 (d,  $J = 15.9$  Hz, 1H), 6.33 (dt,  $J = 15.9, 6.0$  Hz, 1H), 4.26 (dd,  $J = 6.0, 1.5$  Hz, 2H), 2.22 (t,  $J = 7.0$  Hz, 2H), 1.49 (s, 6H), 1.54-1.39 (m, 10H), 0.92 (t,  $J = 7.2$  Hz, 3H);  $^{13}\text{C}$  NMR (100 MHz;  $\text{CDCl}_3$ ):  $\delta$  137.2, 131.7, 128.6, 127.5, 127.3, 126.6, 84.9, 82.4, 70.7, 65.1, 31.0, 29.4, 22.1, 18.5, 13.8; IR (film) 2932, 2862, 1449,  $1185\text{ cm}^{-1}$ ; HRMS (ESI+)  $m/z$  calc'd for  $(\text{M} + \text{H})^+ [\text{C}_{18}\text{H}_{24}\text{O} + \text{H}]^+$ : 257.1900, found 257.1888.

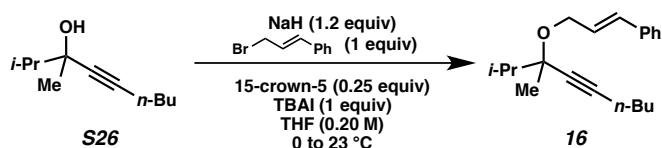

**Enyne 16.** To a solution of tertiary propargyl alcohol **S26** (0.706 g, 4.20 mmol) in THF (21 mL) at 0 °C was added NaH (0.201 g, 60% dispersion in mineral oil, 5.04 mmol). The solution was allowed to warm to ambient temperature and was stirred until gas evolution was visibly complete. To this suspension was added sequentially 15-crown-5 (0.208 mL, 1.05 mmol), tetrabutylammonium iodide (1.55 g, 4.20 mmol), and cinnamyl bromide (0.827 g, 4.20 mmol). The resulting mixture was stirred at ambient temperature for 16.5 h. The reaction was quenched with sat. aq.  $\text{NH}_4\text{Cl}$  (25 mL). The layers were separated, and the aqueous layer was extracted with  $\text{Et}_2\text{O}$  (3 x 20 mL). The combined organic layers were washed with brine (50 mL), then dried over  $\text{MgSO}_4$  and filtered. The solvent was removed by rotary evaporation and the resulting residue was purified by flash chromatography (100% hexanes  $\rightarrow$  1:1 hexanes/ $\text{CH}_2\text{Cl}_2$  eluent), affording enyne **16** (0.800 g, 67% yield,  $R_f$  = 0.86 in 2:1 hexanes/ $\text{CH}_2\text{Cl}_2$ , stained blue with *p*-anisaldehyde) as a yellow oil.

**Enyne 16:**  $^1\text{H}$  NMR (400 MHz;  $\text{CDCl}_3$ ):  $\delta$  7.38 (dd,  $J$  = 8.3, 1.1 Hz, 2H), 7.30 (dd,  $J$  = 8.2, 6.8 Hz, 2H), 7.23-7.19 (m, 1H), 6.61 (d,  $J$  = 15.9 Hz, 1H), 6.33 (dt,  $J$  = 15.9, 5.8 Hz, 1H), 4.32-4.19 (m, 2H), 2.24 (t,  $J$  = 6.9 Hz, 2H), 1.93 (dt,  $J$  = 13.5, 6.8 Hz, 1H), 1.55-1.40 (m, 4H), 1.36 (s, 3H), 1.04 (d,  $J$  = 6.8 Hz, 3H), 0.98 (d,  $J$  = 6.8 Hz, 3H), 0.92 (t,  $J$  = 7.2 Hz, 3H);  $^{13}\text{C}$  NMR (100 MHz;  $\text{CDCl}_3$ ):  $\delta$  137.3, 131.1, 128.6, 127.7, 127.4, 126.6, 86.5, 80.8, 77.4, 64.6, 37.5, 31.1, 23.2, 22.1, 18.5, 18.3, 17.4, 13.8; IR (film) 2961, 2933, 1496, 1205, 964  $\text{cm}^{-1}$ ; HRMS (ESI+)  $m/z$  calc'd for  $(\text{M} + \text{H})^+$  [ $\text{C}_{20}\text{H}_{28}\text{O} + \text{H}$ ] $^+$ : 285.2213, found 285.2205.

## Additional Reactions

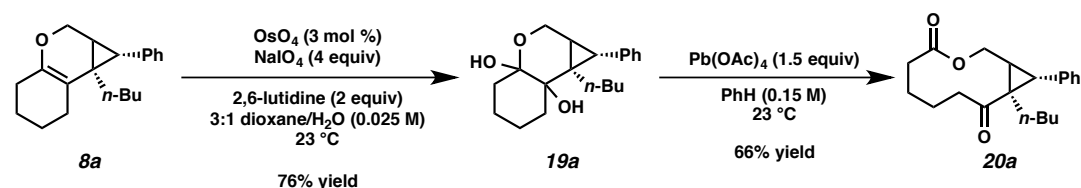

**Diol 19a.** To tricycle **8a** (67.6 mg, 0.239 mmol) in dioxane (7.5 mL) was added  $\text{OsO}_4$  (50.0  $\mu\text{L}$ , 4% solution in  $\text{H}_2\text{O}$ , 7.50  $\mu\text{mol}$ ), followed by 2,6-lutidine (57.6  $\mu\text{L}$ , 0.500 mmol). The mixture was stirred for 5 min, then  $\text{NaIO}_4$  (0.2139 g, 1.00 mmol) was added as a solution in  $\text{H}_2\text{O}$  (2.5 mL). The resulting mixture was stirred at ambient temperature for 1.5 d, after which the mixture was quenched with 1 M  $\text{HCl}$  (5 mL) and diluted with  $\text{EtOAc}$  (5 mL). The layers were separated and the aqueous layer was extracted with  $\text{EtOAc}$  (1 x 5 mL). The combined organic layers were washed with sat.  $\text{Na}_2\text{S}_2\text{O}_3$  (10 mL) and brine (10 mL), then dried over  $\text{MgSO}_4$  and filtered. The solvent was removed by rotary evaporation and the resulting residue was purified by flash chromatography (100% hexanes  $\rightarrow$  1:1 hexanes/ $\text{CH}_2\text{Cl}_2$   $\rightarrow$   $\text{EtOAc}$  eluent), affording diol **19a** (57.4 mg, 76% yield,  $R_f$  = 0.77 in 1:1 hexanes/ $\text{EtOAc}$ , stained with CAM) as a green oil.

**Diol 19a:**  $^1\text{H}$  NMR (400 MHz;  $\text{C}_6\text{D}_6$ ):  $\delta$  7.15-7.06 (m, 5H), 4.23 (dd,  $J$  = 10.6, 4.0 Hz, 1H), 3.69 (d,  $J$  = 10.6 Hz, 1H), 2.39 (d,  $J$  = 1.5 Hz, 1H), 2.20 (d,  $J$  = 6.1 Hz, 1H), 1.96-1.92 (m, 2H), 1.68-1.61 (m, 2H), 1.54-1.47 (m, 4H), 1.45-1.40 (m, 2H), 1.20 (dd,  $J$  = 6.0, 3.9 Hz, 1H), 1.16-0.90 (m, 3H), 0.69 (t,  $J$  = 7.2 Hz, 3H);  $^{13}\text{C}$  NMR (100 MHz;  $\text{C}_6\text{D}_6$ ):  $\delta$  139.2, 129.3, 126.1, 94.4, 70.7, 59.8, 36.5, 35.7, 35.6, 31.9, 31.5, 30.3, 23.7, 23.1, 21.6, 21.2, 14.0; IR (film) 3400, 2935, 2869, 1712, 1064  $\text{cm}^{-1}$ ; HRMS (ESI+)  $m/z$  calc'd for  $(\text{M} - \text{H})^- [\text{C}_{20}\text{H}_{28}\text{O}_3 - \text{H}]^-$ : 315.1960, found 315.1959.

**Macrolactone 20a.** To diol **19a** (25.3 mg, 78.0  $\mu\text{mol}$ ) in benzene (0.70 mL) was added  $\text{Pb}(\text{OAc})_4$  (53.2 mg, 0.120 mmol). The mixture was stirred at ambient temperature for 3.5 h, after which ethylene glycol (1.0 mL) was added and the mixture was allowed to stir for 1 h. The reaction mixture was diluted with  $\text{Et}_2\text{O}$  (1.5 mL) and the layers were separated. The organic layer was washed with sat.  $\text{NaHCO}_3$  (2 mL), then dried over  $\text{MgSO}_4$  and filtered. The solvent was removed by rotary evaporation and the resulting residue was purified by flash chromatography (100% hexanes  $\rightarrow$  4:1 hexanes/ $\text{EtOAc}$  eluent), affording macrolactone **20a** (16.3 mg, 66% yield,  $R_f$  = 0.83 in 1:1 hexanes/ $\text{EtOAc}$ , stained with CAM) as a colorless oil.

**Macrolactone 20a:**  $^1\text{H}$  NMR (400 MHz;  $\text{C}_6\text{D}_6$ ):  $\delta$  7.09-7.01 (m, 3H), 6.96 (dd,  $J$  = 5.2, 3.2 Hz, 2H), 4.54 (dd,  $J$  = 11.6, 6.6 Hz, 1H), 3.80 (dd,  $J$  = 11.6, 6.6 Hz, 1H), 3.34 (d,  $J$  = 6.9 Hz, 1H), 2.63 (ddd,  $J$  = 16.8, 10.8, 2.4 Hz, 1H), 2.15 (m, 2H), 2.05-1.90 (m, 2H), 1.85-1.72 (m, 2H), 1.44-

1.31 (m, 4H), 0.96-0.74 (m, 4H), 0.51 (t,  $J = 7.1$  Hz, 3H);  $^{13}\text{C}$  NMR (100 MHz;  $\text{C}_6\text{D}_6$ ):  $\delta$  206.5, 172.0, 137.2, 128.9, 128.2, 126.5, 62.4, 44.3, 39.5, 34.6, 34.0, 31.1, 30.5, 28.7, 23.0, 22.8, 13.5; IR (film) 2933, 2872, 1737, 1698, 1233  $\text{cm}^{-1}$ ; HRMS (ESI+)  $m/z$  calc'd for  $(\text{M} + \text{H})^+$  [ $\text{C}_{20}\text{H}_{26}\text{O}_3 + \text{H}$ ] $^+$ : 315.1960, found 315.1962.

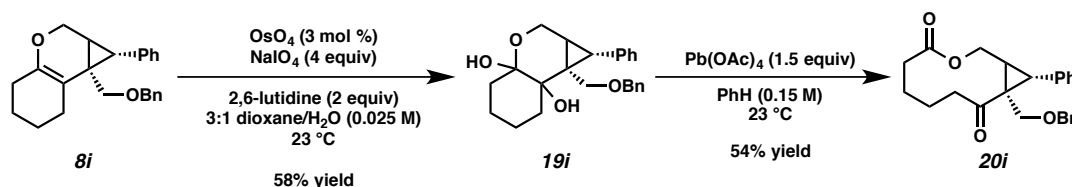

**Diol 19i.** To tricyclic **8i** (34.5 mg, 90.7  $\mu\text{mol}$ ) in dioxane (3.0 mL) was added  $\text{OsO}_4$  (19.0  $\mu\text{L}$ , 4% solution in  $\text{H}_2\text{O}$ , 2.72  $\mu\text{mol}$ ), followed by 2,6-lutidine (20.9  $\mu\text{L}$ , 19.4  $\mu\text{mol}$ ). The mixture was stirred for 5 min, then  $\text{NaIO}_4$  (85.6 mg, 0.400 mmol) was added as a solution in  $\text{H}_2\text{O}$  (1.0 mL). The resulting mixture was stirred at ambient temperature for 3 d, after which the mixture was quenched with 1 M  $\text{HCl}$  (3 mL) and diluted with  $\text{EtOAc}$  (3 mL). The layers were separated and the aqueous layer was extracted with  $\text{EtOAc}$  (1 x 3 mL). The combined organic layers were washed with sat.  $\text{Na}_2\text{S}_2\text{O}_3$  (5 mL) and brine (5 mL), then dried over  $\text{MgSO}_4$  and filtered. The solvent was removed by rotary evaporation and the resulting residue was purified by flash chromatography (100% hexanes  $\rightarrow$  1:1 hexanes/ $\text{EtOAc}$  eluent), affording diol **19i** (20.0 mg, 58% yield,  $R_f = 0.66$  in 1:1 hexanes/ $\text{EtOAc}$ , stained with CAM) as a green oil.

**Diol 19i:**  $^1\text{H}$  NMR (400 MHz;  $\text{C}_6\text{D}_6$ ):  $\delta$  7.14-6.95 (m, 10H), 4.42 (dd,  $J = 11.1, 4.5$  Hz, 1H), 3.87-3.80 (m, 2H), 3.75 (d,  $J = 11.2$  Hz, 2H), 3.36 (d,  $J = 9.5$  Hz, 1H), 2.80 (d,  $J = 9.5$  Hz, 1H), 2.32 (d,  $J = 6.3$  Hz, 1H), 2.15-2.02 (m, 2H), 1.91-1.84 (m, 2H), 1.65-1.52 (m, 2H), 1.47-1.41 (m, 1H), 1.12 (dd,  $J = 6.2, 4.6$  Hz, 1H);  $^{13}\text{C}$  NMR (100 MHz;  $\text{C}_6\text{D}_6$ ):  $\delta$  138.2, 137.9, 129.4, 128.7, 128.4, 128.0, 127.9, 126.6, 94.1, 73.1, 72.3, 71.0, 58.9, 36.2, 35.3, 33.5, 30.8, 22.9, 21.2, 19.9; IR (film) 3449, 2933, 2865, 1498, 1071  $\text{cm}^{-1}$ ; HRMS (ESI+)  $m/z$  calc'd for  $(\text{M} + \text{Na})^+$  [ $\text{C}_{24}\text{H}_{28}\text{O}_4 + \text{Na}$ ] $^+$ : 403.1885, found 403.1889.

**Macrolactone 20i.** To diol **19i** (25.3 mg, 78.0  $\mu\text{mol}$ ) in benzene (0.70 mL) was added  $\text{Pb}(\text{OAc})_4$  (53.2 mg, 0.120 mmol). The mixture was stirred at ambient temperature for 3.5 h, after which ethylene glycol (1.0 mL) was added and the mixture was allowed to stir for 1 h. The reaction mixture was diluted with  $\text{Et}_2\text{O}$  (1.5 mL) and the layers were separated. The organic layer was washed with sat.  $\text{NaHCO}_3$  (2 mL), then dried over  $\text{MgSO}_4$  and filtered. The solvent was removed by rotary evaporation and the resulting residue was purified by flash chromatography (100% hexanes  $\rightarrow$  4:1 hexanes/ $\text{EtOAc}$  eluent), affording macrolactone **20i** (16.3 mg, 66% yield,  $R_f = 0.83$  in 1:1 hexanes/ $\text{EtOAc}$ , stained with CAM) as a colorless oil.

**Macrolactone 20i:**  $^1\text{H}$  NMR (400 MHz;  $\text{C}_6\text{D}_6$ ):  $\delta$  7.11-7.00 (m, 8H), 6.93-6.91 (m, 2H), 4.43 (dd,  $J = 11.7, 6.8$  Hz, 1H), 3.93-3.81 (m, 3H), 3.57 (d,  $J = 6.9$  Hz, 1H), 2.89 (ddd,  $J = 16.6, 9.2, 2.4$  Hz, 1H), 2.61 (d,  $J = 10.5$  Hz, 1H), 2.44 (ddd,  $J = 16.6, 9.2, 2.4$  Hz, 1H), 2.13-2.06 (m, 1H), 2.01-1.88 (m, 1H), 1.84-1.74 (m, 1H), 1.71 (q,  $J = 6.8$  Hz, 1H), 1.44-1.30 (m, 4H);  $^{13}\text{C}$  NMR (100 MHz;  $\text{C}_6\text{D}_6$ ):  $\delta$  205.5, 172.0, 136.9, 129.6, 128.5, 128.2, 127.9, 127.6, 126.9, 99.3, 73.1, 69.6, 62.1, 42.8, 39.8, 34.90, 34.87, 29.2, 22.93, 22.91, 13.4 IR (film) 2926, 2856, 1735, 1698, 1231, 1154  $\text{cm}^{-1}$ ; HRMS (ESI+)  $m/z$  calc'd for  $(\text{M} + \text{Na})^+$  [ $\text{C}_{24}\text{H}_{26}\text{O}_4 + \text{Na}$ ] $^+$ : 401.1729, found 401.1733.

## Crystallographic Data

**Table 1 Crystal data and structure refinement for 8e**

|                                             |                                                   |
|---------------------------------------------|---------------------------------------------------|
| Identification code                         | <b>8e</b>                                         |
| Empirical formula                           | C <sub>17</sub> H <sub>20</sub> O                 |
| Formula weight                              | 240.33                                            |
| Temperature/K                               | 100(2)                                            |
| Crystal system                              | monoclinic                                        |
| Space group                                 | Cc                                                |
| a/Å                                         | 16.9694(6)                                        |
| b/Å                                         | 10.1758(6)                                        |
| c/Å                                         | 7.7382(3)                                         |
| α/°                                         | 90.00                                             |
| β/°                                         | 92.801(3)                                         |
| γ/°                                         | 90.00                                             |
| Volume/Å <sup>3</sup>                       | 1334.61(11)                                       |
| Z                                           | 4                                                 |
| ρ <sub>calc</sub> /mg/mm <sup>3</sup>       | 1.196                                             |
| m/mm <sup>-1</sup>                          | 0.072                                             |
| F(000)                                      | 520.0                                             |
| Crystal size/mm <sup>3</sup>                | 0.57 × 0.47 × 0.37                                |
| 2θ range for data collection                | 4.66 to 78.76°                                    |
| Index ranges                                | -30 ≤ h ≤ 30, -18 ≤ k ≤ 17, -13 ≤ l ≤ 13          |
| Reflections collected                       | 28192                                             |
| Independent reflections                     | 7745[R(int) = 0.0359]                             |
| Data/restraints/parameters                  | 7745/2/164                                        |
| Goodness-of-fit on F <sup>2</sup>           | 1.064                                             |
| Final R indexes [I ≥ 2σ (I)]                | R <sub>1</sub> = 0.0323, wR <sub>2</sub> = 0.0884 |
| Final R indexes [all data]                  | R <sub>1</sub> = 0.0344, wR <sub>2</sub> = 0.0898 |
| Largest diff. peak/hole / e Å <sup>-3</sup> | 0.44/-0.21                                        |
| Flack parameter                             | 0.3(5)                                            |



**Table 2 Fractional Atomic Coordinates ( $\times 10^4$ ) and Equivalent Isotropic Displacement Parameters ( $\text{\AA}^2 \times 10^3$ ) for 8e.  $U_{\text{eq}}$  is defined as 1/3 of the trace of the orthogonalised  $U_{ij}$  tensor.**

| Atom | <i>x</i>  | <i>y</i>  | <i>z</i>   | U(eq)     |
|------|-----------|-----------|------------|-----------|
| O1   | 2433.8(3) | 3952.5(5) | 7948.6(6)  | 17.52(8)  |
| C1   | 2547.6(3) | 2872.7(5) | 6904.3(7)  | 14.09(8)  |
| C2   | 1791.7(3) | 2460.5(6) | 5986.7(8)  | 19.35(9)  |
| C3   | 1850.2(4) | 1084.4(7) | 5229.4(9)  | 22.48(11) |
| C4   | 2626.8(4) | 936.6(7)  | 4327.2(9)  | 23.85(11) |
| C5   | 3338.8(3) | 1121.1(6) | 5597.0(7)  | 16.95(9)  |
| C6   | 3249.0(3) | 2268.5(5) | 6809.1(6)  | 12.15(7)  |
| C7   | 3942.0(3) | 2700.0(5) | 7954.2(6)  | 11.92(7)  |
| C8   | 3837.1(3) | 4030.3(5) | 8789.1(7)  | 14.49(8)  |
| C9   | 3109.2(4) | 4787.4(5) | 8212.4(7)  | 16.49(9)  |
| C10  | 3797.7(3) | 2817.6(5) | 9894.9(7)  | 14.76(8)  |
| C11  | 4442.3(4) | 2563.0(7) | 11270.5(8) | 20.96(10) |
| C12  | 4740.9(3) | 2293.9(5) | 7406.4(6)  | 12.97(8)  |
| C13  | 5046.6(3) | 1060.0(5) | 7863.3(7)  | 15.81(8)  |
| C14  | 5767.5(3) | 641.1(6)  | 7284.9(8)  | 19.55(10) |
| C15  | 6195.8(3) | 1450.8(7) | 6225.0(8)  | 21.97(11) |
| C16  | 5901.4(4) | 2685.1(7) | 5771.5(9)  | 22.63(11) |
| C17  | 5180.1(3) | 3107.7(6) | 6366.3(7)  | 18.19(9)  |

**Table 3 Anisotropic Displacement Parameters ( $\text{\AA}^2 \times 10^3$ ) for 8e. The Anisotropic displacement factor exponent takes the form:  $-2\pi^2[h^2a^{*2}U_{11}+...+2hkaxbxU_{12}]$**

| Atom | $U_{11}$  | $U_{22}$  | $U_{33}$  | $U_{23}$  | $U_{13}$  | $U_{12}$ |
|------|-----------|-----------|-----------|-----------|-----------|----------|
| O1   | 14.84(16) | 18.22(18) | 19.61(17) | -2.34(13) | 1.96(13)  | 5.73(13) |
| C1   | 12.34(17) | 16.17(19) | 13.70(18) | 0.70(15)  | 0.04(14)  | 2.79(15) |
| C2   | 12.57(18) | 24.7(2)   | 20.3(2)   | 1.57(19)  | -3.27(16) | 2.21(18) |
| C3   | 17.8(2)   | 25.2(3)   | 23.7(2)   | -1.1(2)   | -7.12(19) | -1.9(2)  |
| C4   | 23.1(2)   | 29.3(3)   | 18.6(2)   | -7.7(2)   | -5.11(19) | 1.3(2)   |
| C5   | 16.23(19) | 18.1(2)   | 16.3(2)   | -5.30(16) | -0.91(16) | 1.76(16) |
| C6   | 11.37(16) | 13.34(17) | 11.73(17) | -0.35(14) | 0.27(13)  | 1.77(13) |
| C7   | 11.48(16) | 12.08(17) | 12.16(16) | -0.98(13) | 0.32(13)  | 2.06(13) |
| C8   | 16.38(19) | 12.38(18) | 14.58(18) | -2.00(14) | -0.54(15) | 2.79(15) |
| C9   | 20.1(2)   | 13.96(18) | 15.4(2)   | -0.88(15) | 0.22(16)  | 5.40(16) |
| C10  | 15.80(18) | 16.97(19) | 11.42(17) | -0.03(15) | -0.25(14) | 3.90(15) |
| C11  | 23.2(2)   | 23.6(2)   | 15.4(2)   | -0.89(18) | -5.02(18) | 6.3(2)   |
| C12  | 11.34(16) | 13.65(18) | 13.90(18) | -1.38(14) | 0.53(13)  | 0.99(14) |
| C13  | 13.53(18) | 14.78(19) | 19.1(2)   | -0.92(16) | 1.10(15)  | 2.91(15) |
| C14  | 15.02(19) | 21.1(2)   | 22.5(2)   | -5.00(19) | 0.28(17)  | 5.70(17) |
| C15  | 13.24(19) | 31.1(3)   | 21.9(2)   | -7.8(2)   | 3.17(17)  | 1.79(19) |
| C16  | 19.0(2)   | 28.2(3)   | 21.3(3)   | -2.0(2)   | 7.13(19)  | -3.2(2)  |
| C17  | 18.1(2)   | 18.3(2)   | 18.5(2)   | 1.32(17)  | 3.85(17)  | 0.02(17) |

**Table 4 Bond Lengths for 8e.**

| Atom | Atom | Length/ $\text{\AA}$ | Atom | Atom | Length/ $\text{\AA}$ |
|------|------|----------------------|------|------|----------------------|
| O1   | C1   | 1.3830(7)            | C7   | C12  | 1.4982(7)            |
| O1   | C9   | 1.4332(8)            | C8   | C9   | 1.5048(8)            |
| C1   | C2   | 1.4955(8)            | C8   | C10  | 1.5051(8)            |
| C1   | C6   | 1.3449(7)            | C10  | C11  | 1.5109(8)            |
| C2   | C3   | 1.5230(10)           | C12  | C13  | 1.3974(7)            |
| C3   | C4   | 1.5285(10)           | C12  | C17  | 1.3956(8)            |
| C4   | C5   | 1.5313(8)            | C13  | C14  | 1.3899(7)            |
| C5   | C6   | 1.5100(7)            | C14  | C15  | 1.3922(10)           |
| C6   | C7   | 1.5030(7)            | C15  | C16  | 1.3903(10)           |
| C7   | C8   | 1.5142(7)            | C16  | C17  | 1.3965(8)            |
| C7   | C10  | 1.5380(7)            |      |      |                      |

**Table 5 Bond Angles for 8e.**

| Atom | Atom | Atom | Angle/°   | Atom | Atom | Atom | Angle/°   |
|------|------|------|-----------|------|------|------|-----------|
| C1   | O1   | C9   | 114.88(4) | C12  | C7   | C10  | 119.15(4) |
| O1   | C1   | C2   | 111.06(4) | C9   | C8   | C7   | 116.30(4) |
| C6   | C1   | O1   | 122.98(5) | C9   | C8   | C10  | 121.98(5) |
| C6   | C1   | C2   | 125.92(5) | C10  | C8   | C7   | 61.25(3)  |
| C1   | C2   | C3   | 111.72(5) | O1   | C9   | C8   | 112.20(4) |
| C2   | C3   | C4   | 109.88(5) | C8   | C10  | C7   | 59.67(3)  |
| C3   | C4   | C5   | 111.45(5) | C8   | C10  | C11  | 119.36(5) |
| C6   | C5   | C4   | 113.14(5) | C11  | C10  | C7   | 122.02(5) |
| C1   | C6   | C5   | 120.26(5) | C13  | C12  | C7   | 120.41(5) |
| C1   | C6   | C7   | 120.21(4) | C17  | C12  | C7   | 121.04(5) |
| C7   | C6   | C5   | 119.49(4) | C17  | C12  | C13  | 118.49(5) |
| C6   | C7   | C8   | 114.07(4) | C14  | C13  | C12  | 121.05(5) |
| C6   | C7   | C10  | 116.18(4) | C13  | C14  | C15  | 120.08(6) |
| C8   | C7   | C10  | 59.08(3)  | C16  | C15  | C14  | 119.46(5) |
| C12  | C7   | C6   | 116.44(4) | C15  | C16  | C17  | 120.32(6) |
| C12  | C7   | C8   | 119.61(4) | C12  | C17  | C16  | 120.58(6) |

**Table 6 Hydrogen Atom Coordinates ( $\text{\AA}\times 10^4$ ) and Isotropic Displacement Parameters ( $\text{\AA}^2\times 10^3$ ) for 8e.**

| Atom | x    | y    | z     | U(eq) |
|------|------|------|-------|-------|
| H2A  | 1657 | 3092 | 5045  | 23    |
| H2B  | 1362 | 2481 | 6808  | 23    |
| H3A  | 1401 | 929  | 4388  | 27    |
| H3B  | 1824 | 424  | 6164  | 27    |
| H4A  | 2648 | 1596 | 3390  | 29    |
| H4B  | 2650 | 53   | 3797  | 29    |
| H5A  | 3417 | 309  | 6288  | 20    |
| H5B  | 3817 | 1256 | 4934  | 20    |
| H8   | 4329 | 4565 | 8964  | 17    |
| H9A  | 2998 | 5456 | 9097  | 20    |
| H9B  | 3207 | 5253 | 7120  | 20    |
| H10  | 3255 | 2567 | 10223 | 18    |
| H11A | 4946 | 2888 | 10872 | 31    |
| H11B | 4482 | 1617 | 11493 | 31    |
| H11C | 4317 | 3020 | 12338 | 31    |
| H13  | 4757 | 499  | 8581  | 19    |
| H14  | 5968 | -199 | 7613  | 23    |
| H15  | 6685 | 1162 | 5815  | 26    |
| H16  | 6192 | 3244 | 5054  | 27    |
| H17  | 4987 | 3957 | 6060  | 22    |

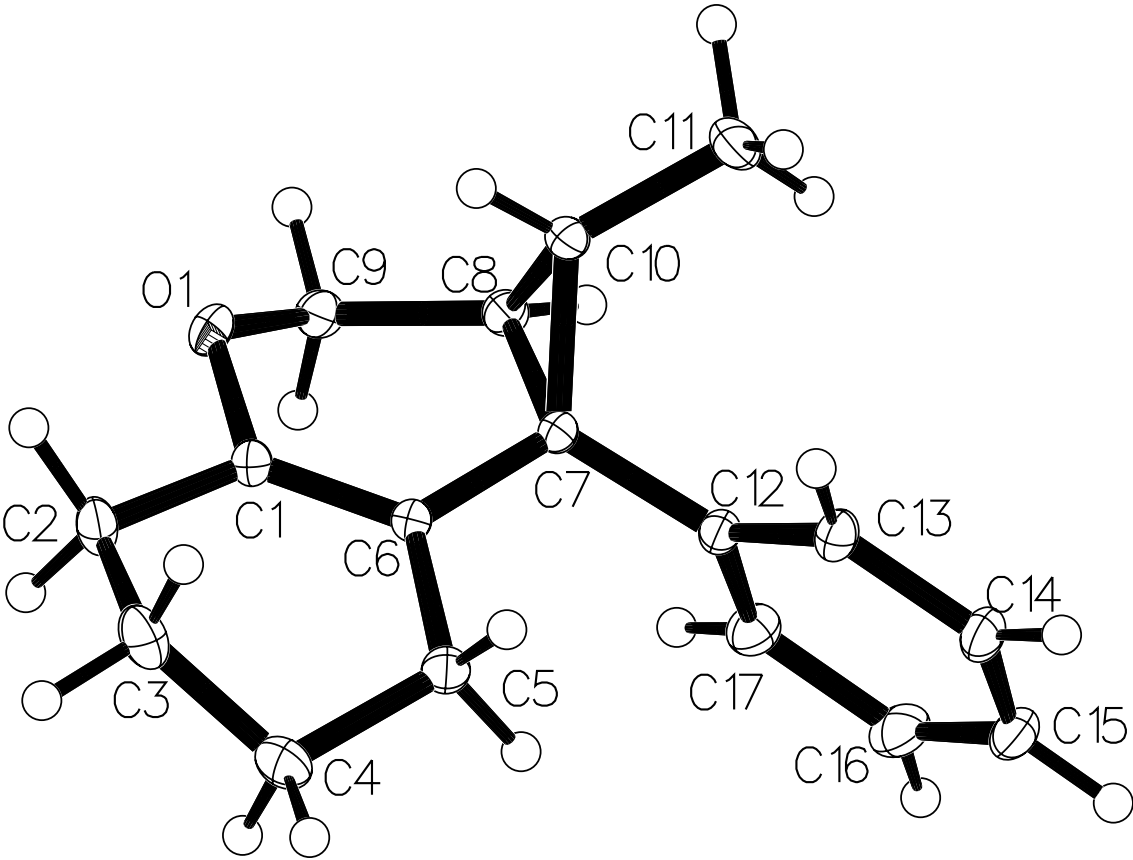

Supplement: c3cc47499b.pdf [file c3cc47499b.pdf]
