# Supplementary material for: C–C bond migration in the cycloisomerization of oxygen-tethered 1,6-enynes
Source: Royal Society of Chemistry journal article supplement (doi:10.1039/c3cc47499b), 2013-11-27

**Supporting Information - Spectra Compilation**

**C-C Bond Migration in the Cycloisomerization of Oxygen-Tethered 1,6-Enynes**

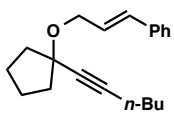

**7a**  
**<sup>1</sup>H NMR**  
**(400 MHz, CDCl<sub>3</sub>)**

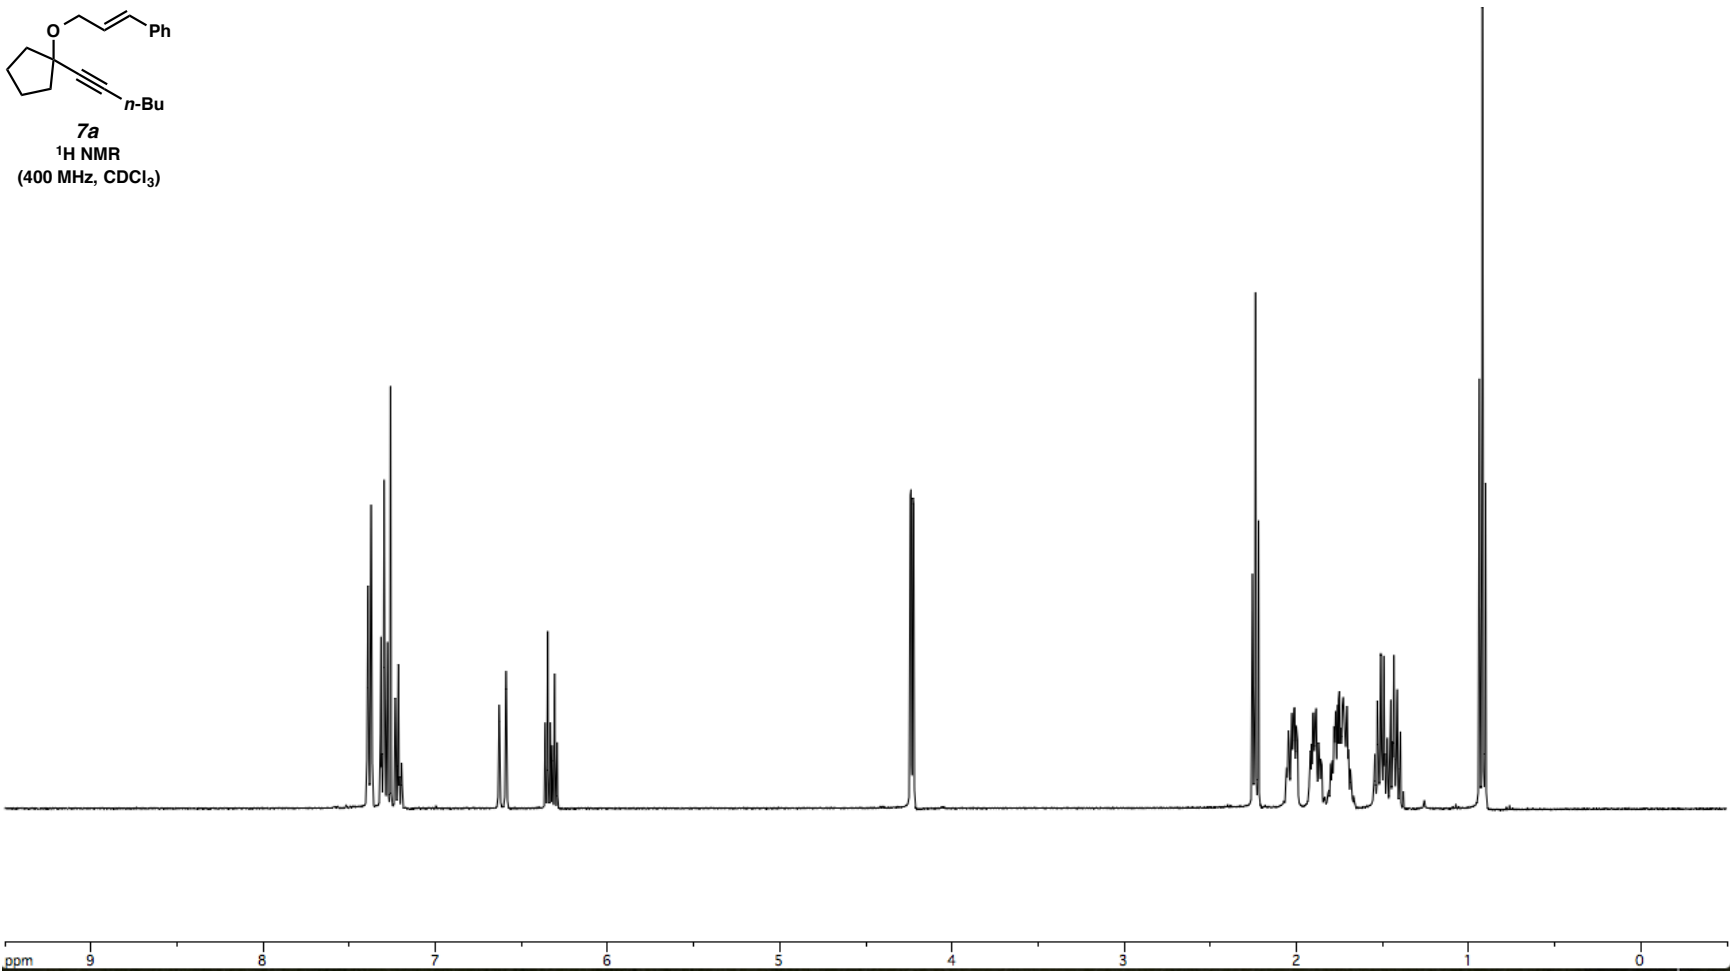

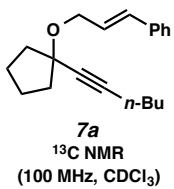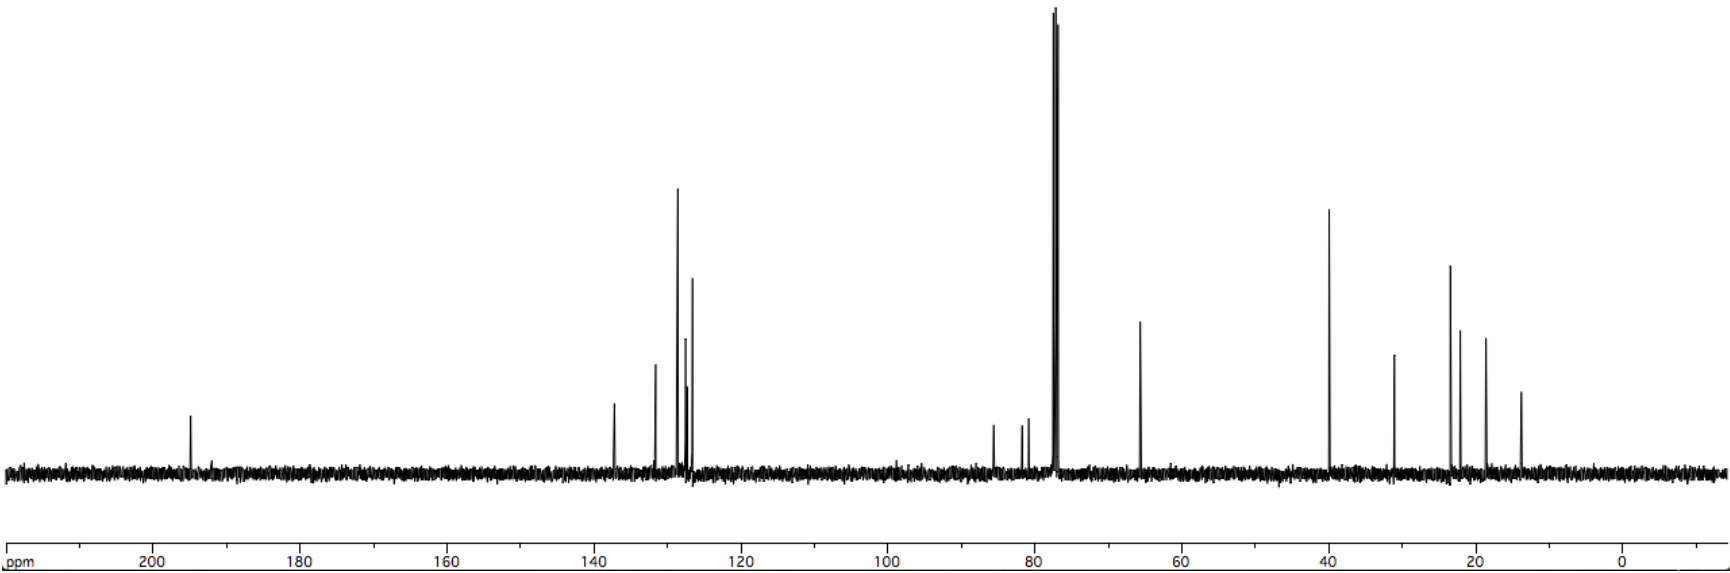

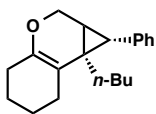

**8a**  
<sup>1</sup>H NMR  
(400 MHz, C<sub>6</sub>D<sub>6</sub>)

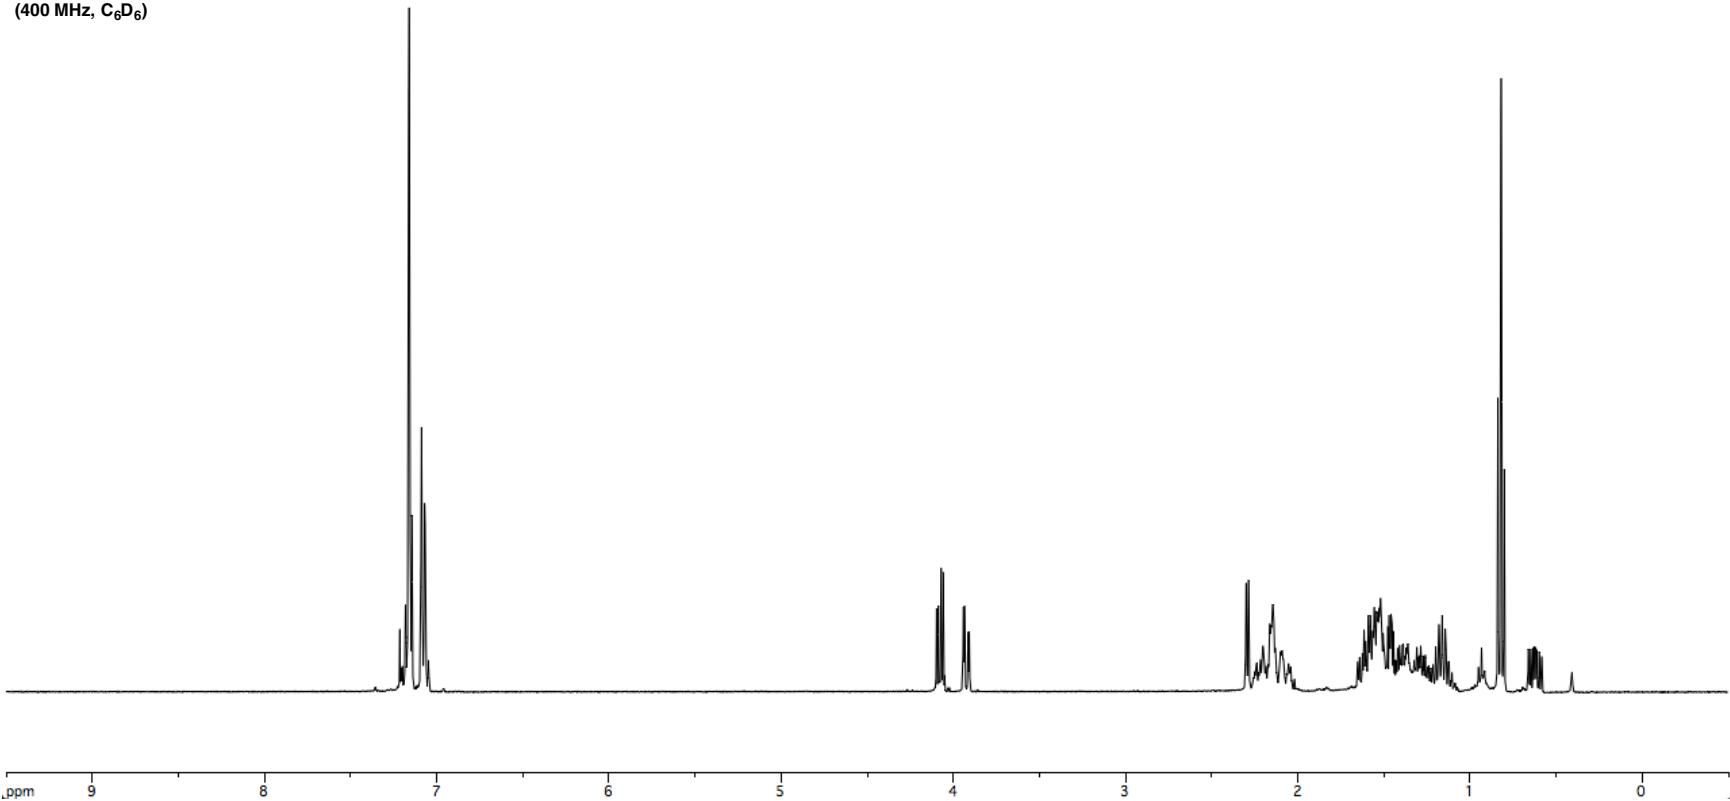



**8a**  
<sup>13</sup>C NMR  
(100 MHz, C<sub>6</sub>D<sub>6</sub>)

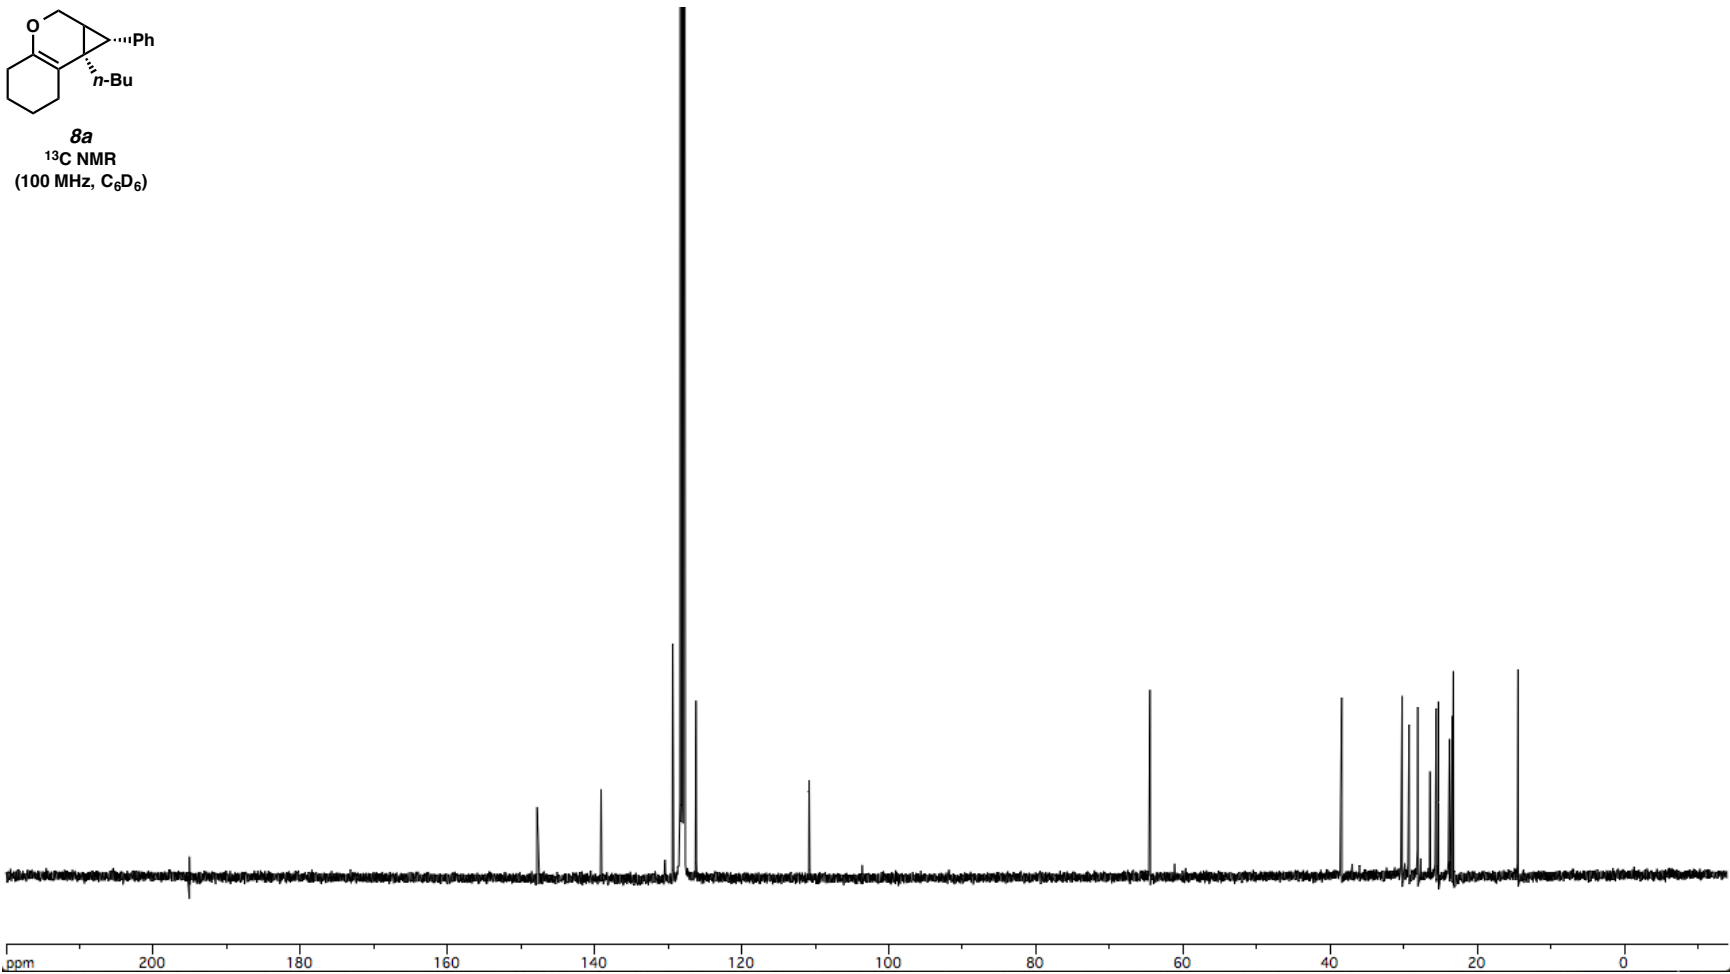

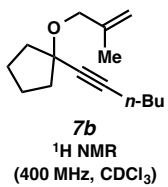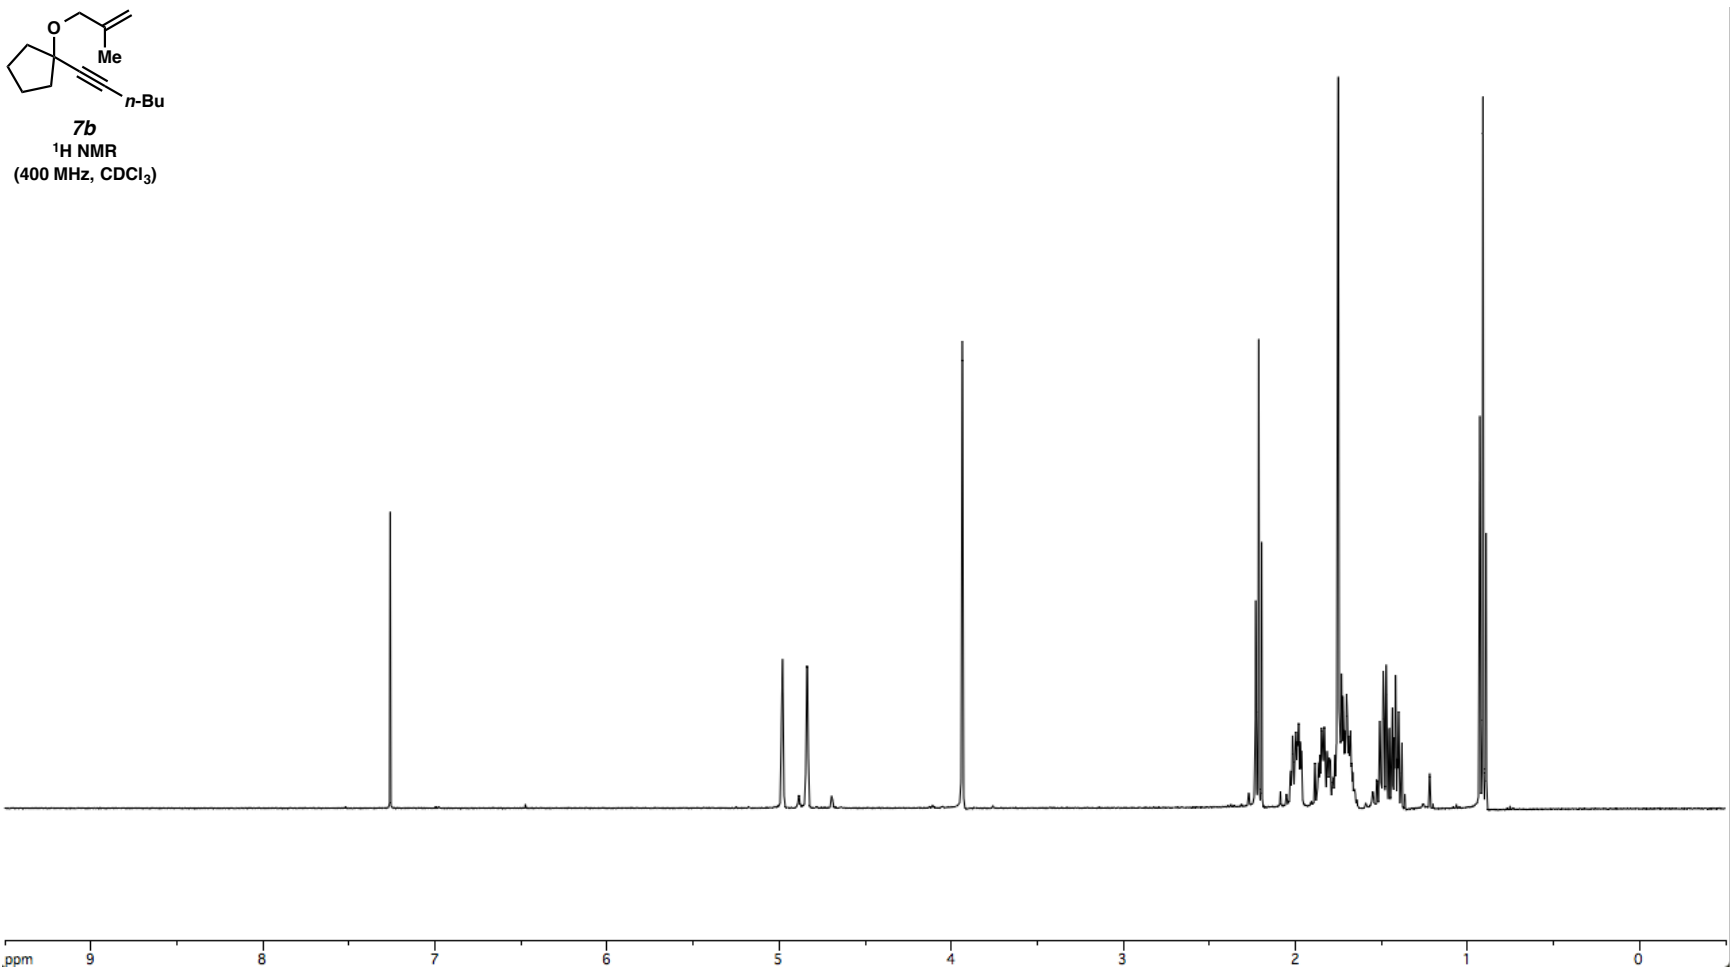

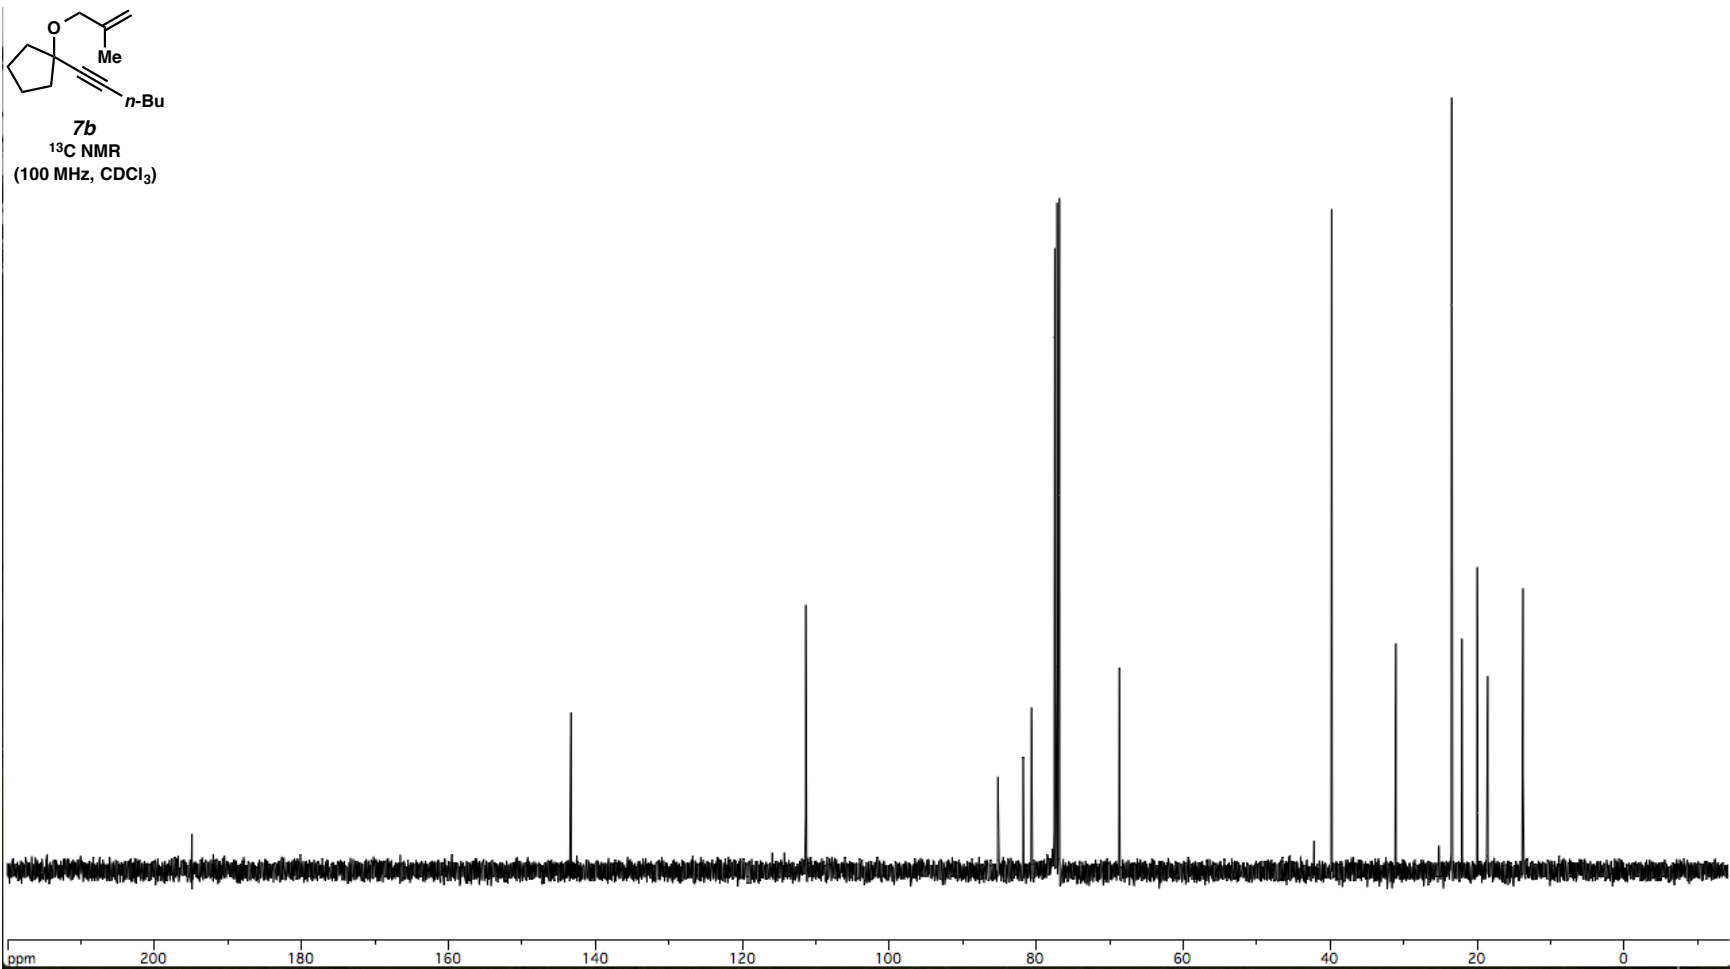

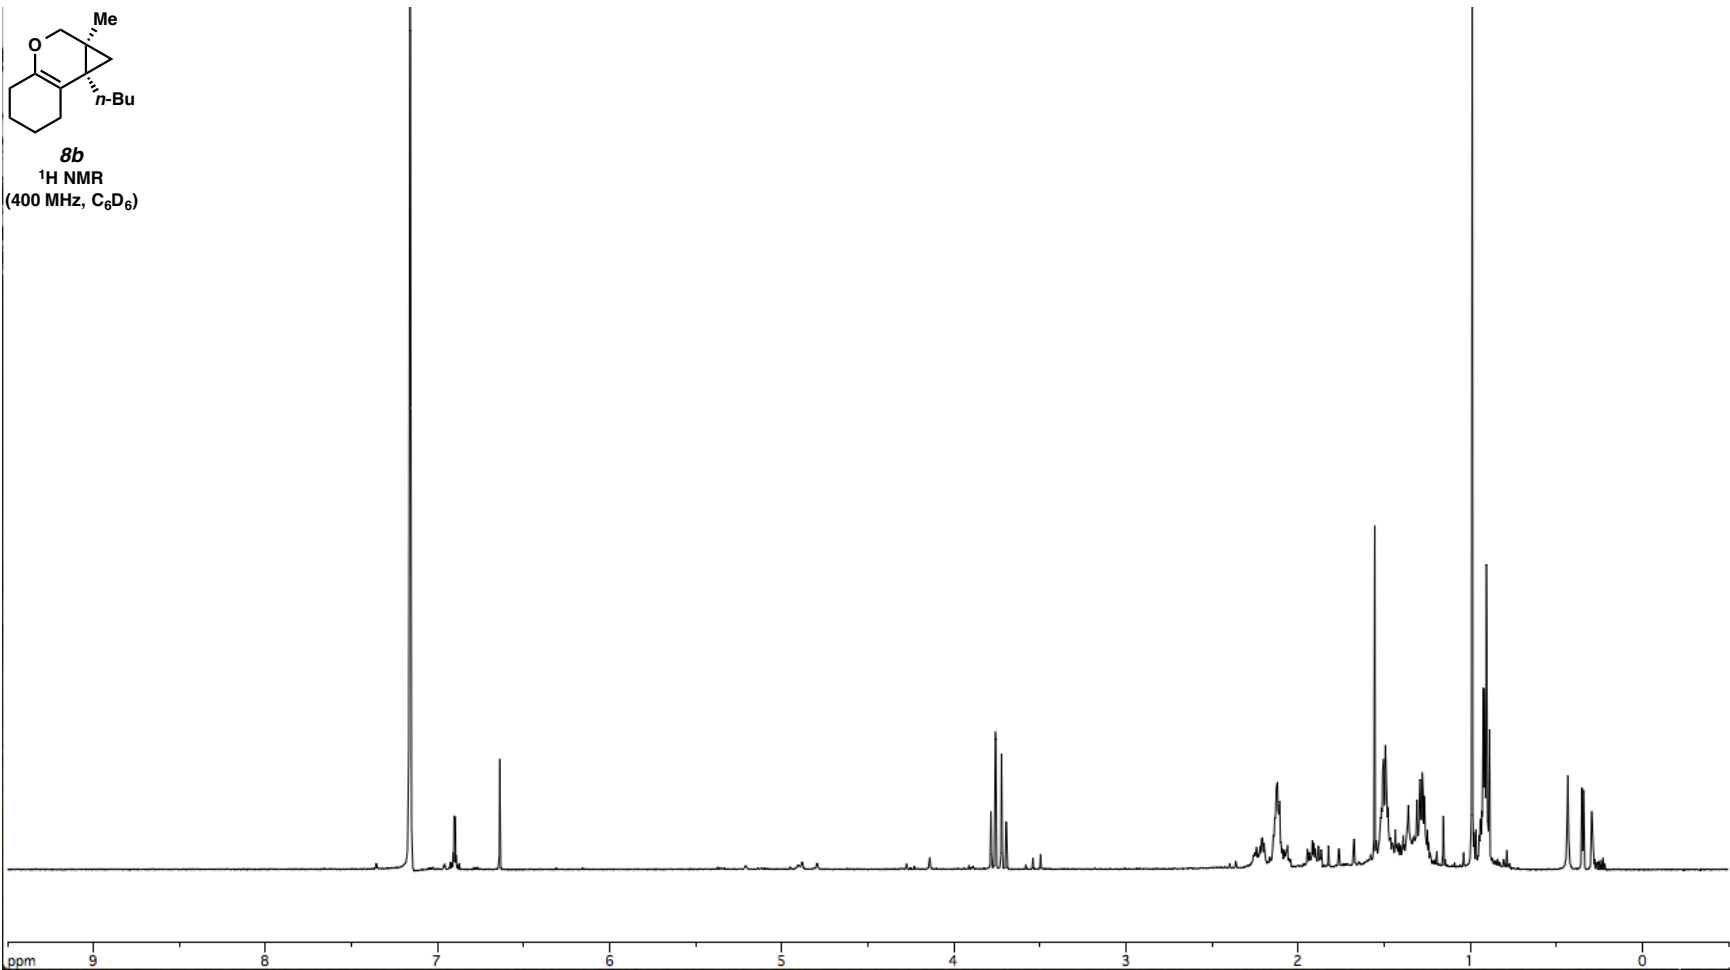



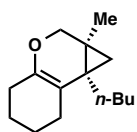

**8b**  
<sup>13</sup>C NMR  
(100 MHz, C<sub>6</sub>D<sub>6</sub>)

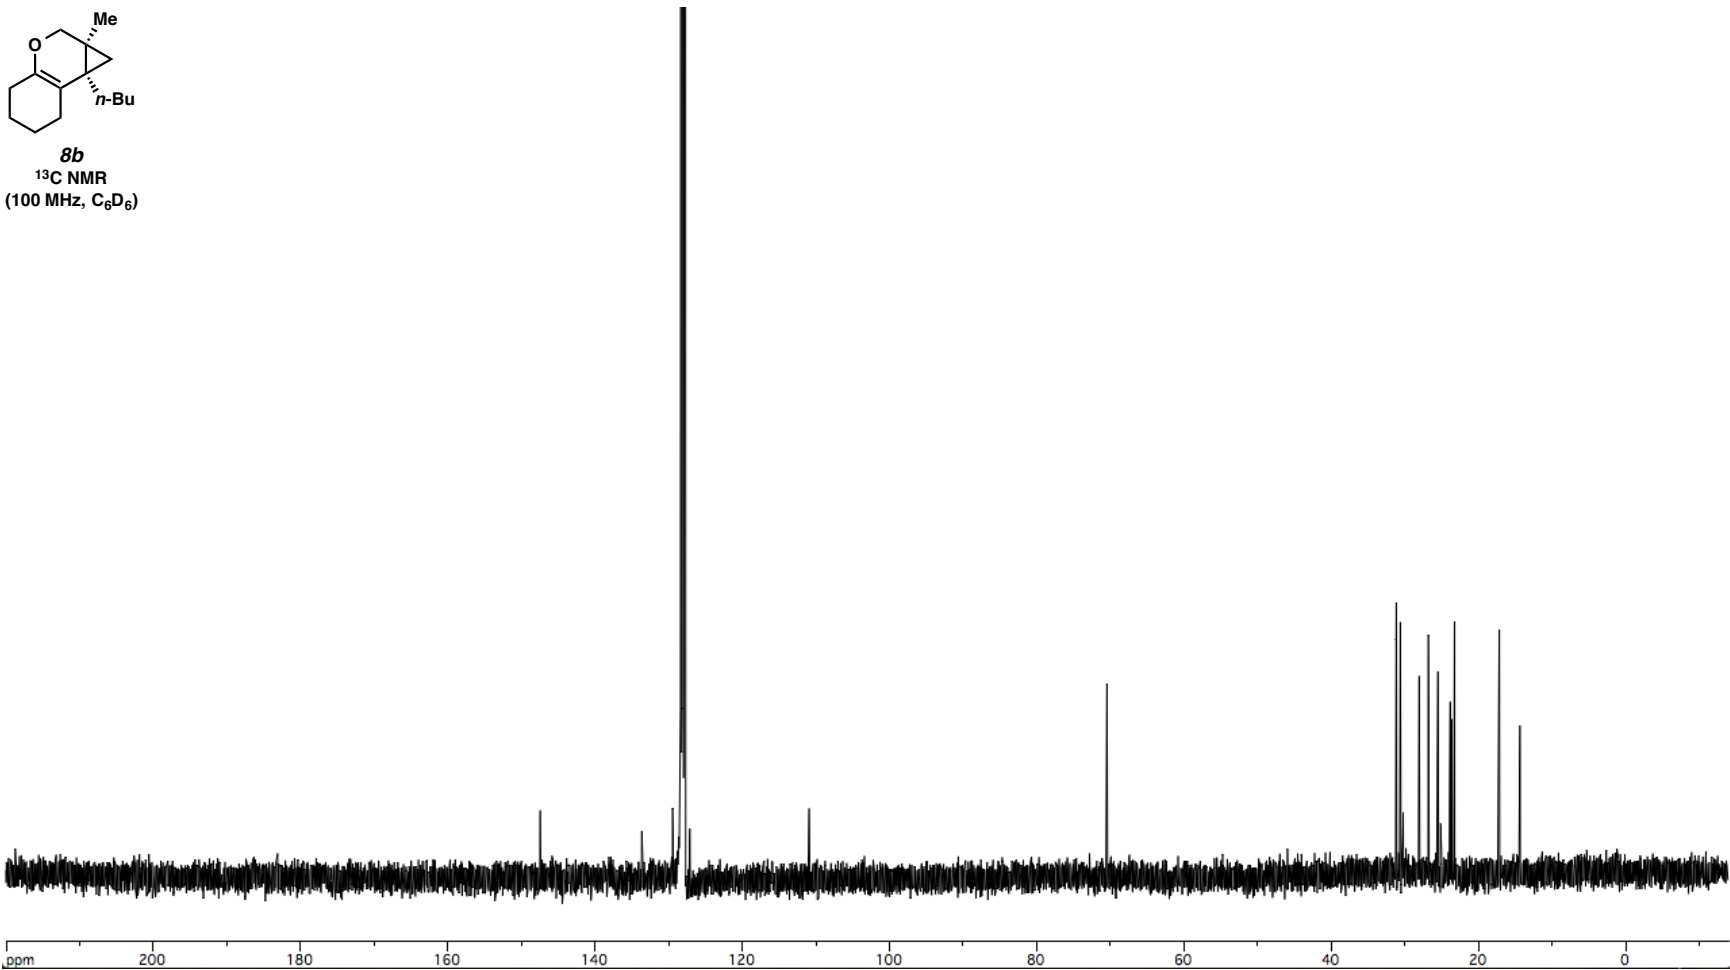

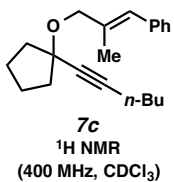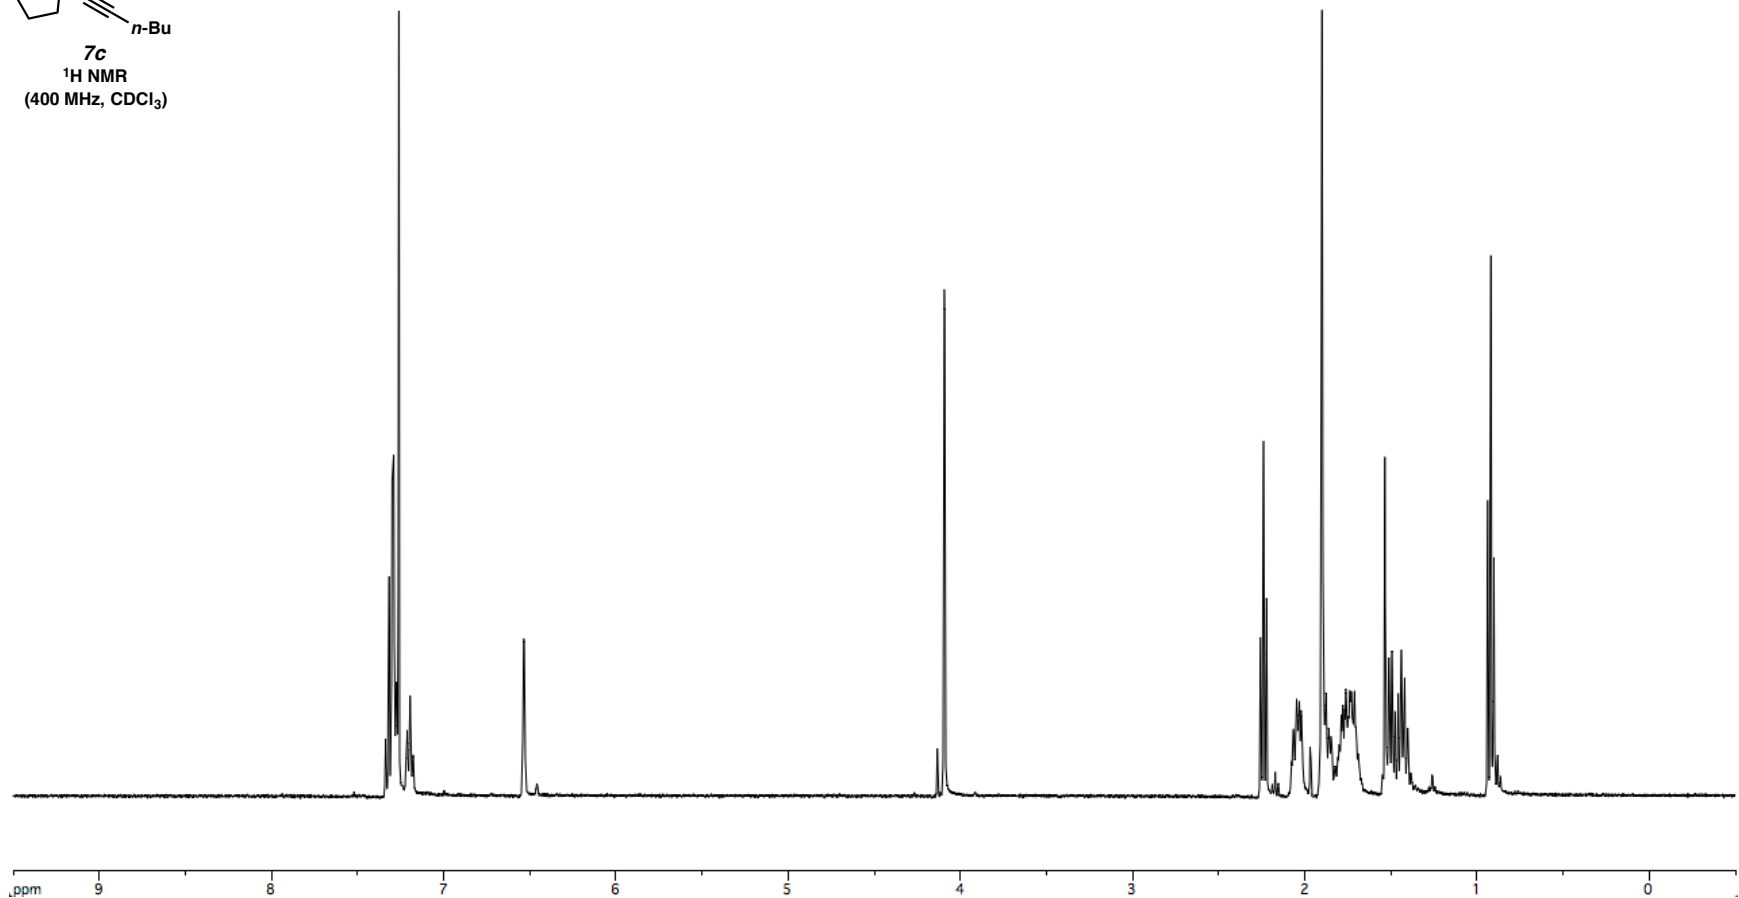

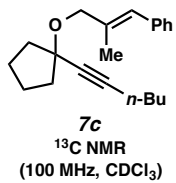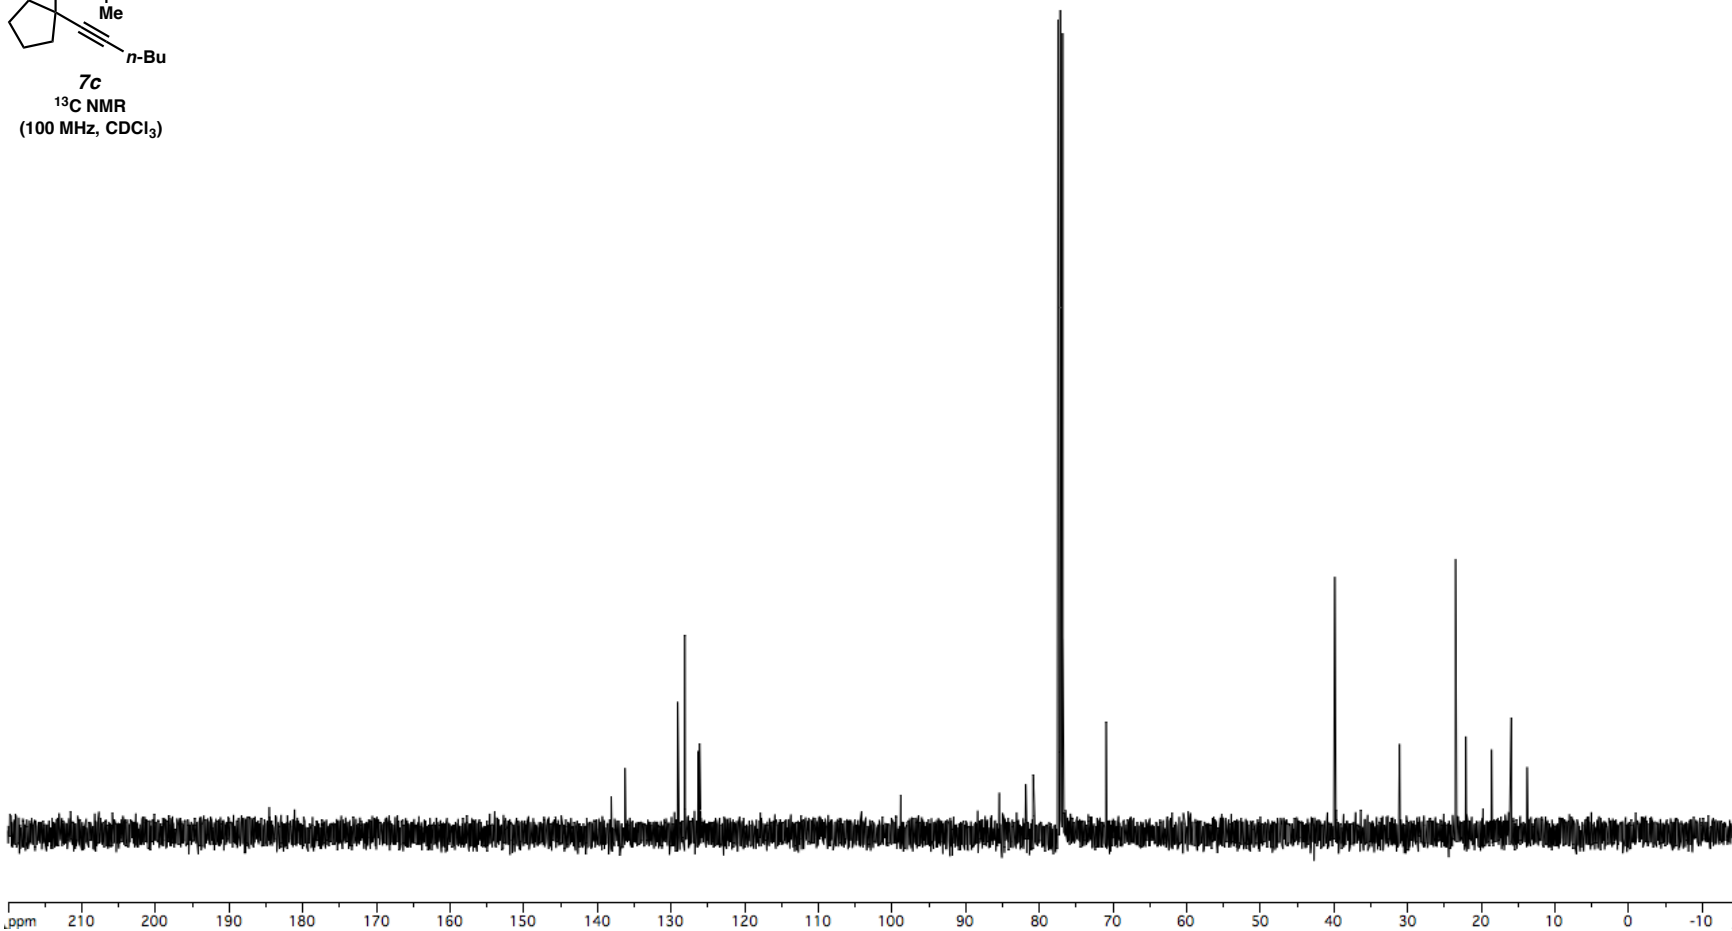

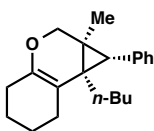

**8c**  
<sup>1</sup>H NMR  
(400 MHz, C<sub>6</sub>D<sub>6</sub>)

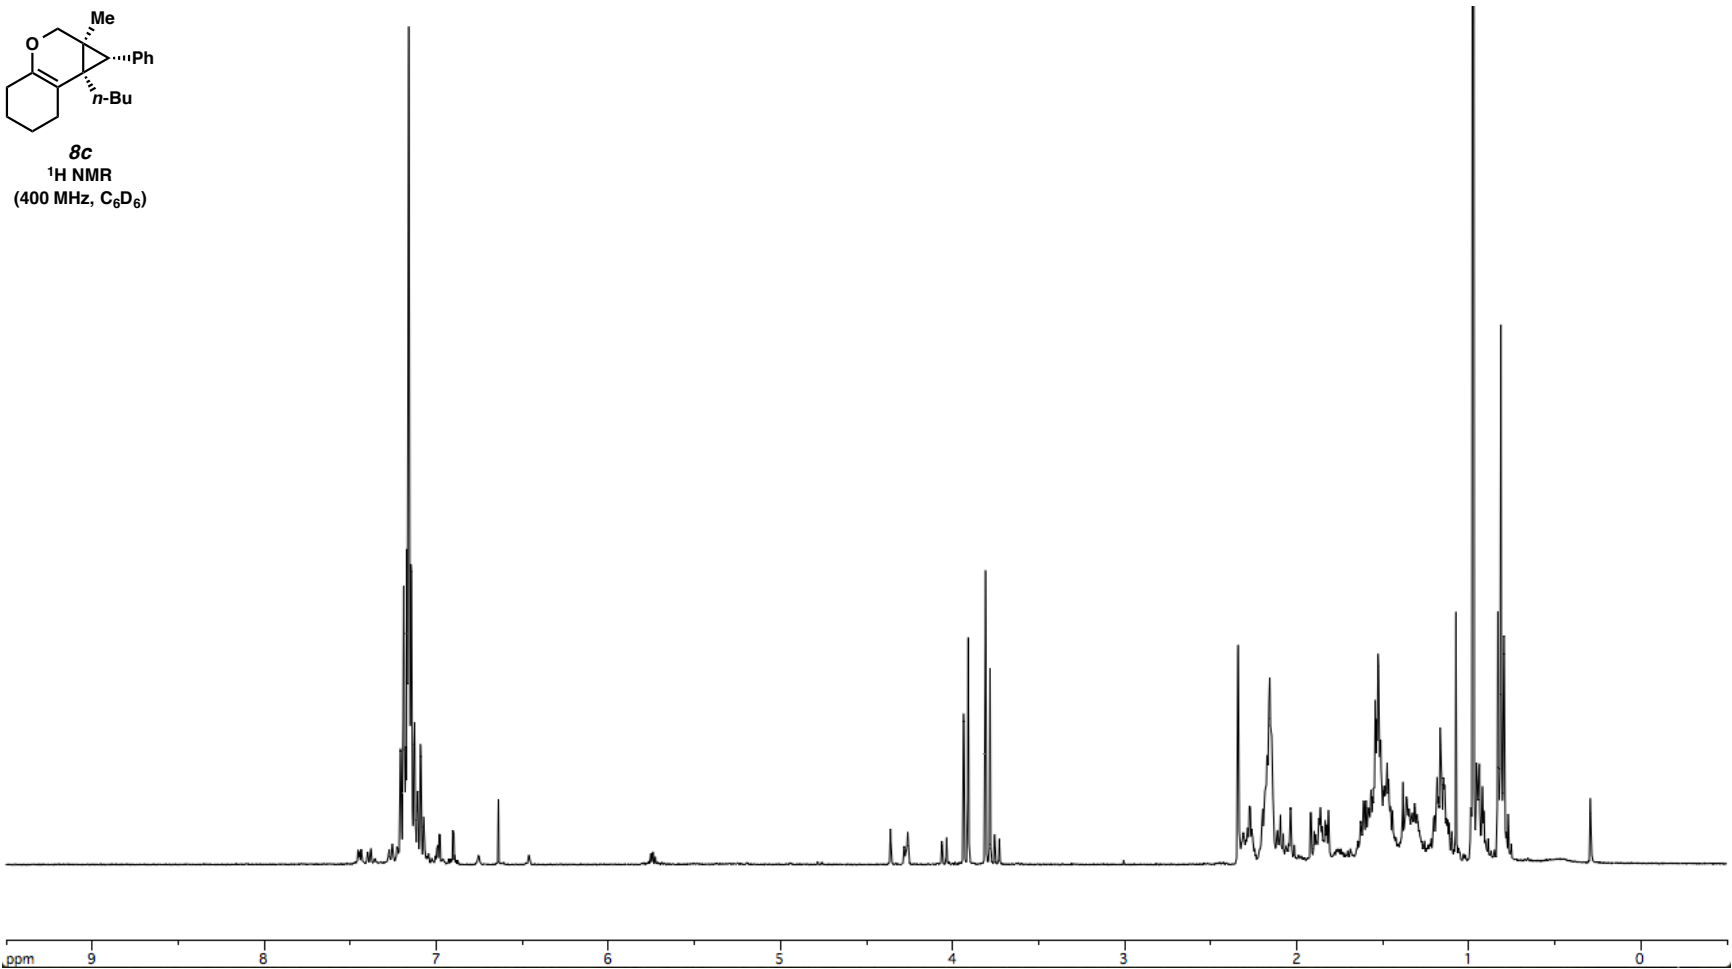

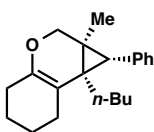

**8c**  
<sup>13</sup>C NMR  
(100 MHz, C<sub>6</sub>D<sub>6</sub>)

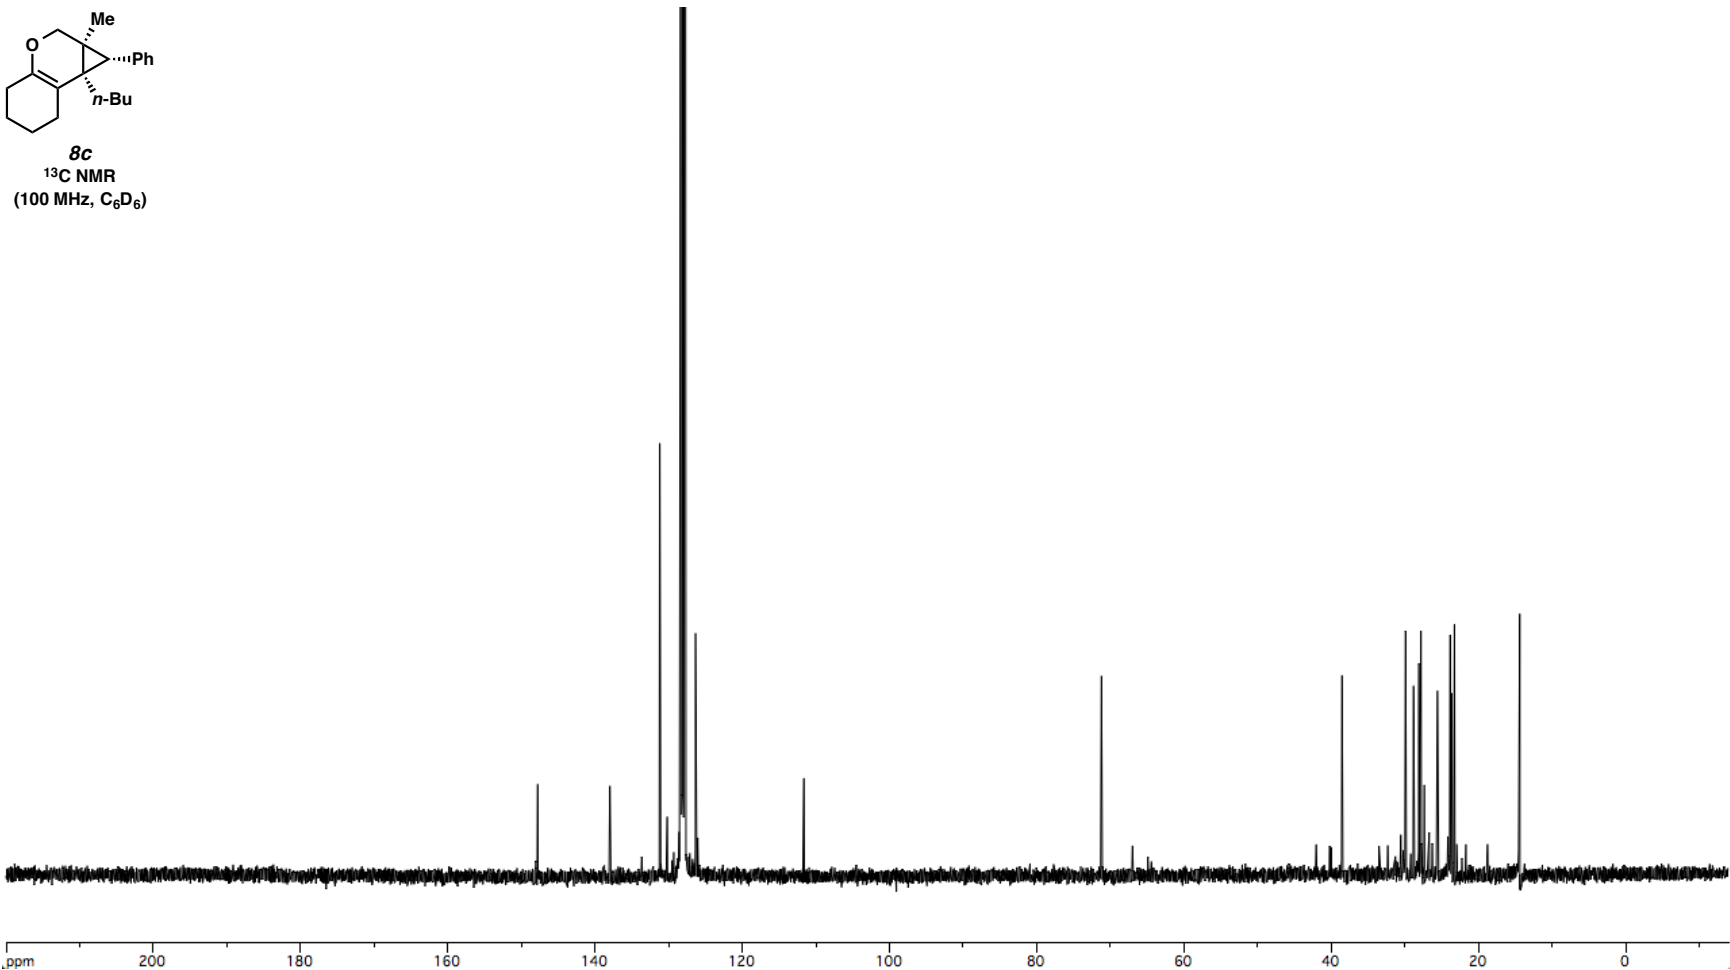

S58

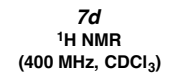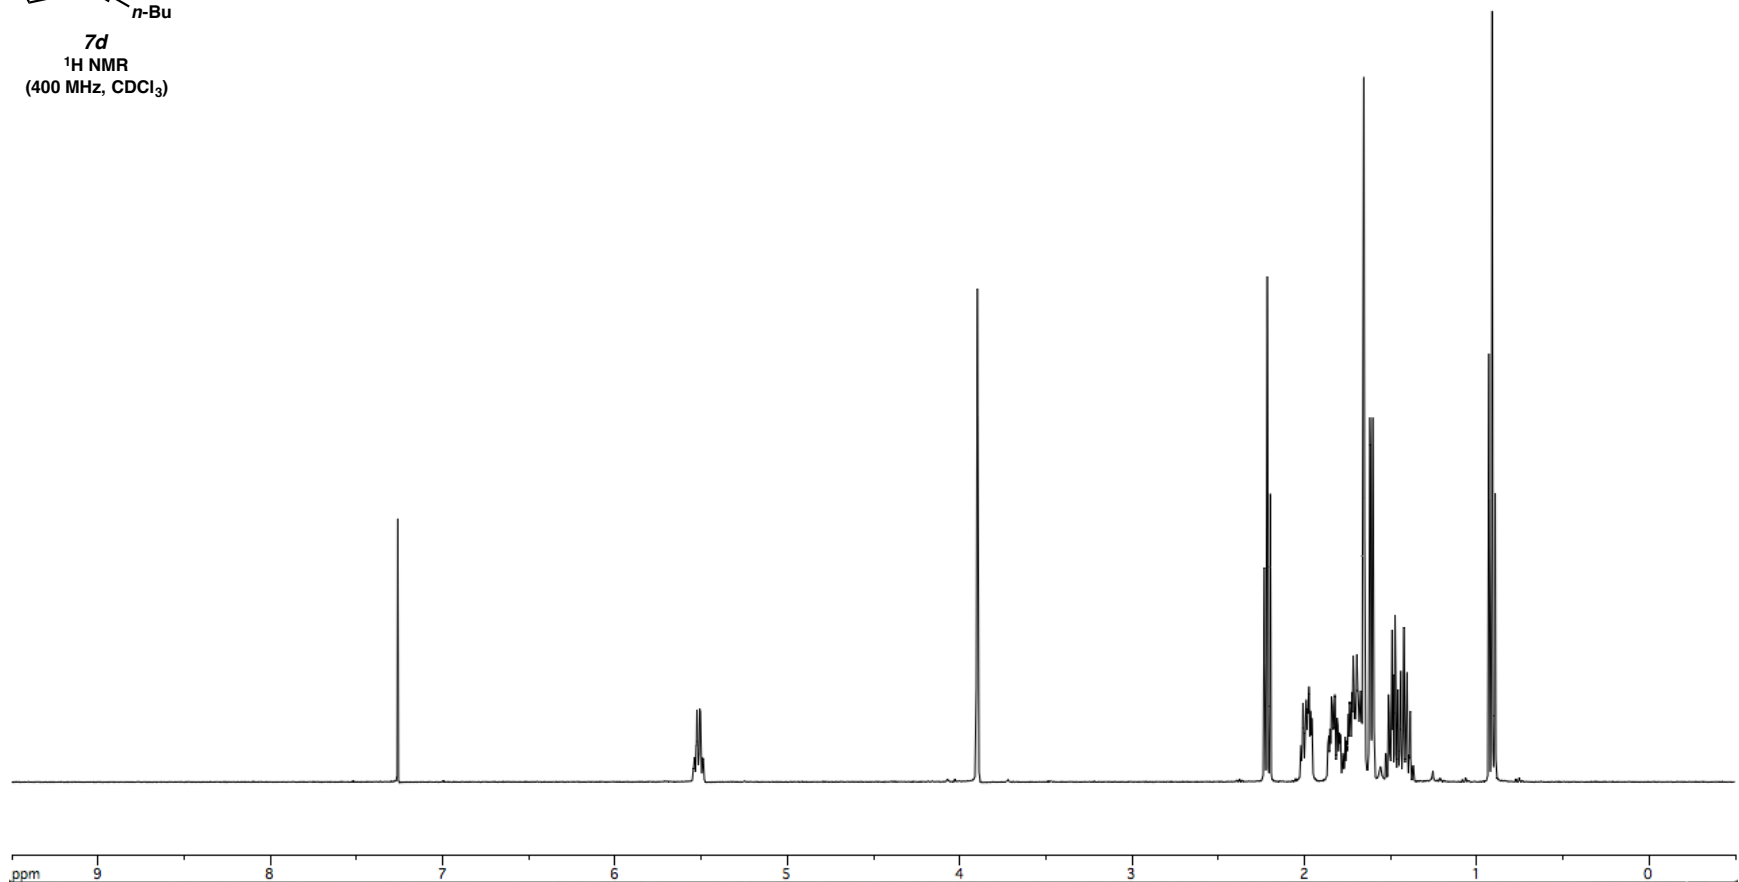

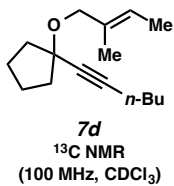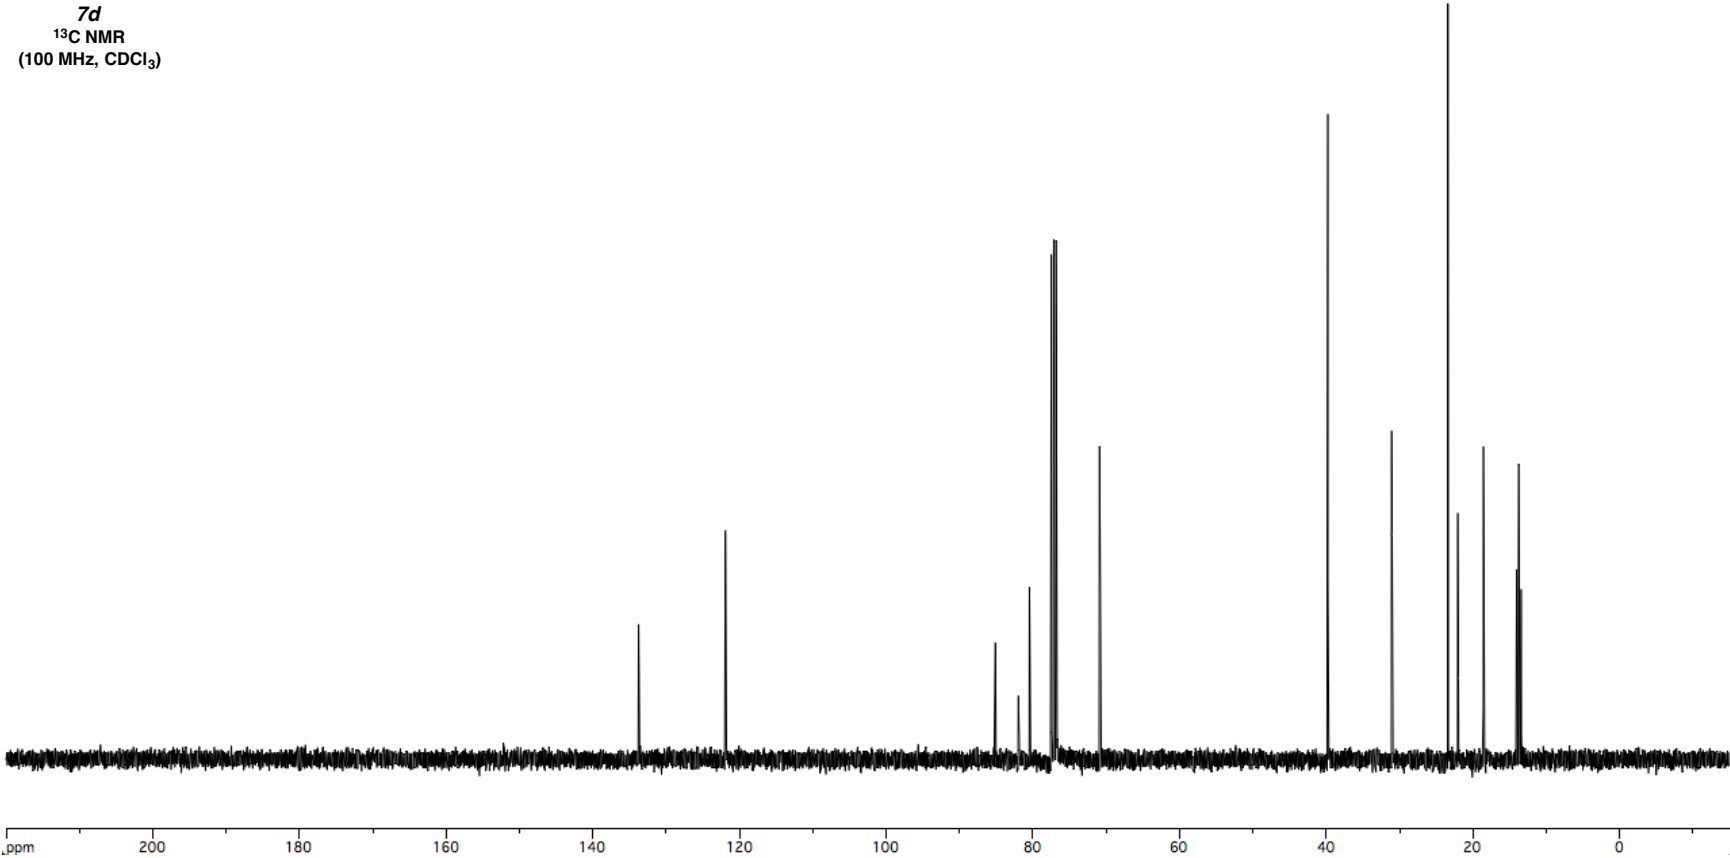

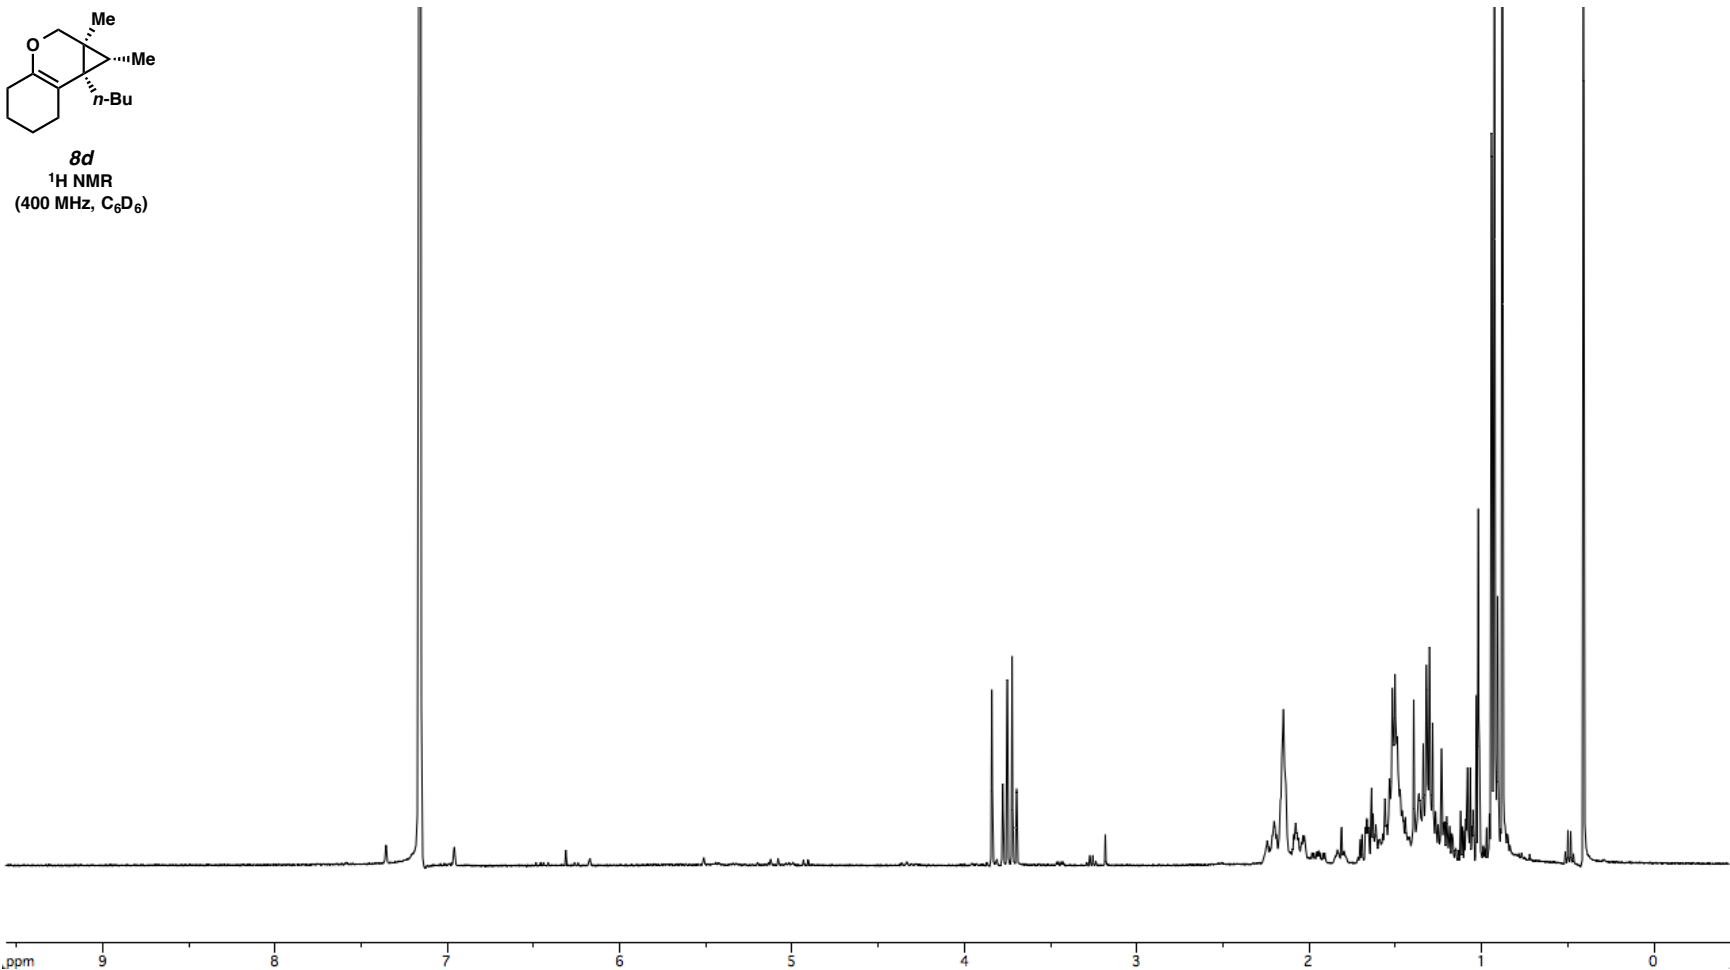



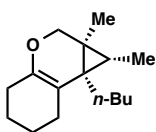

**8d**  
<sup>13</sup>C NMR  
(100 MHz, C<sub>6</sub>D<sub>6</sub>)

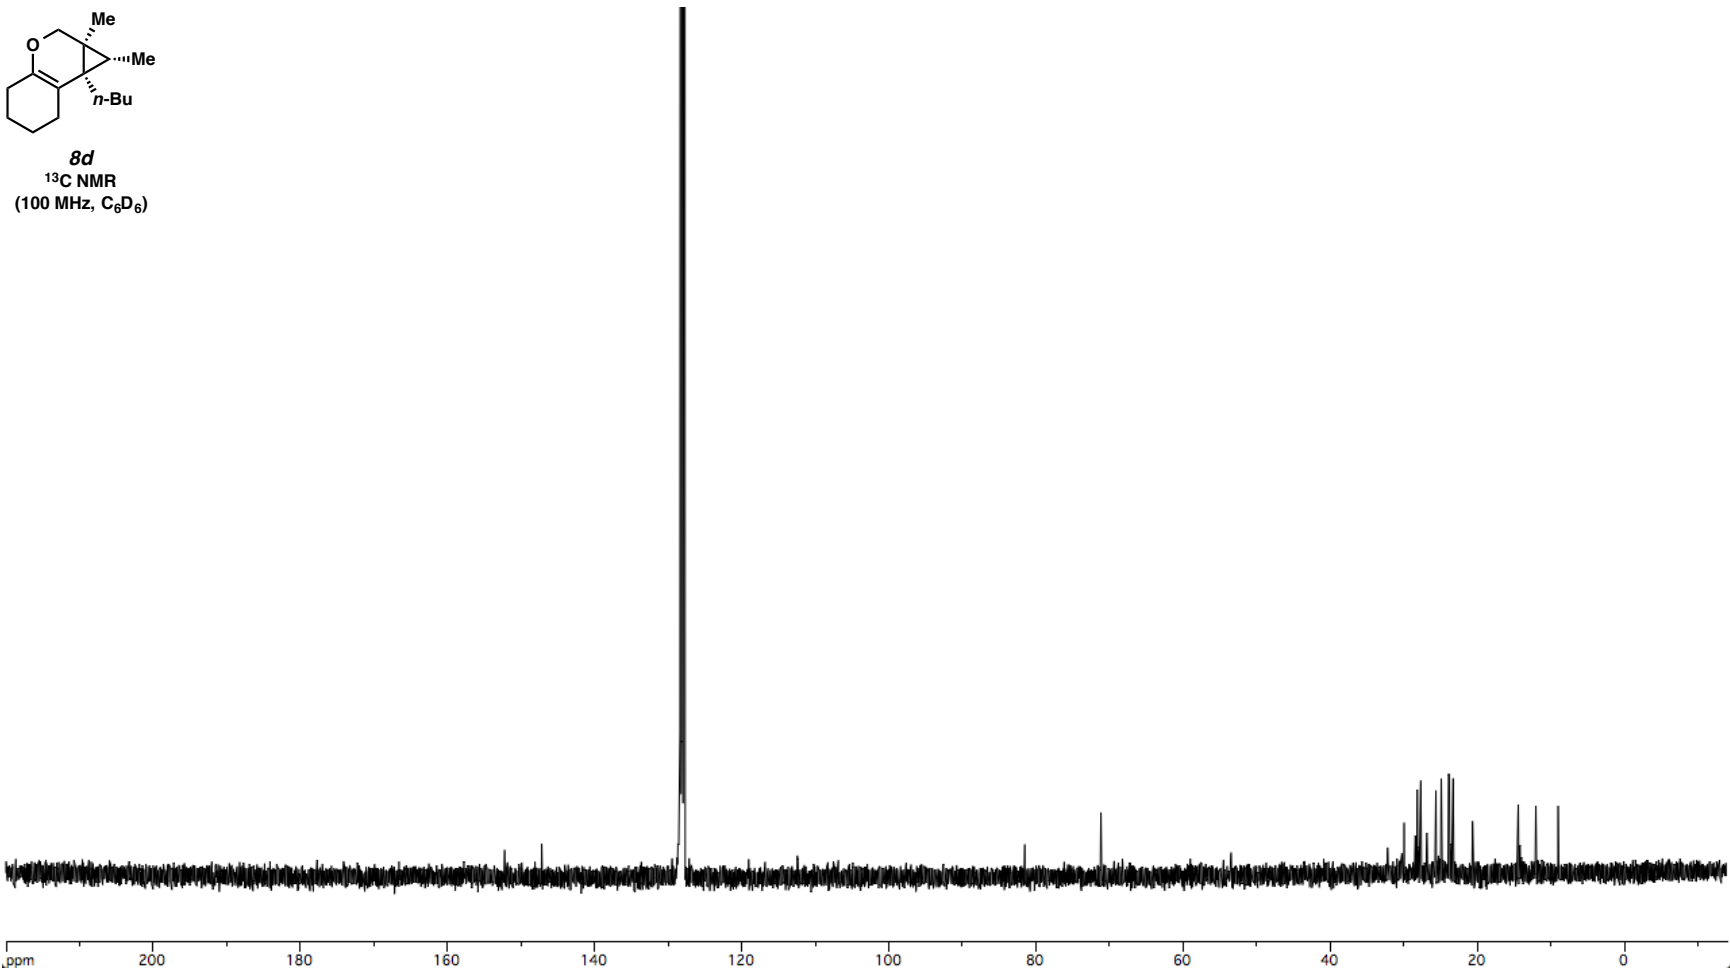

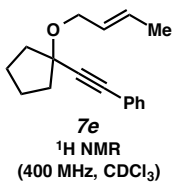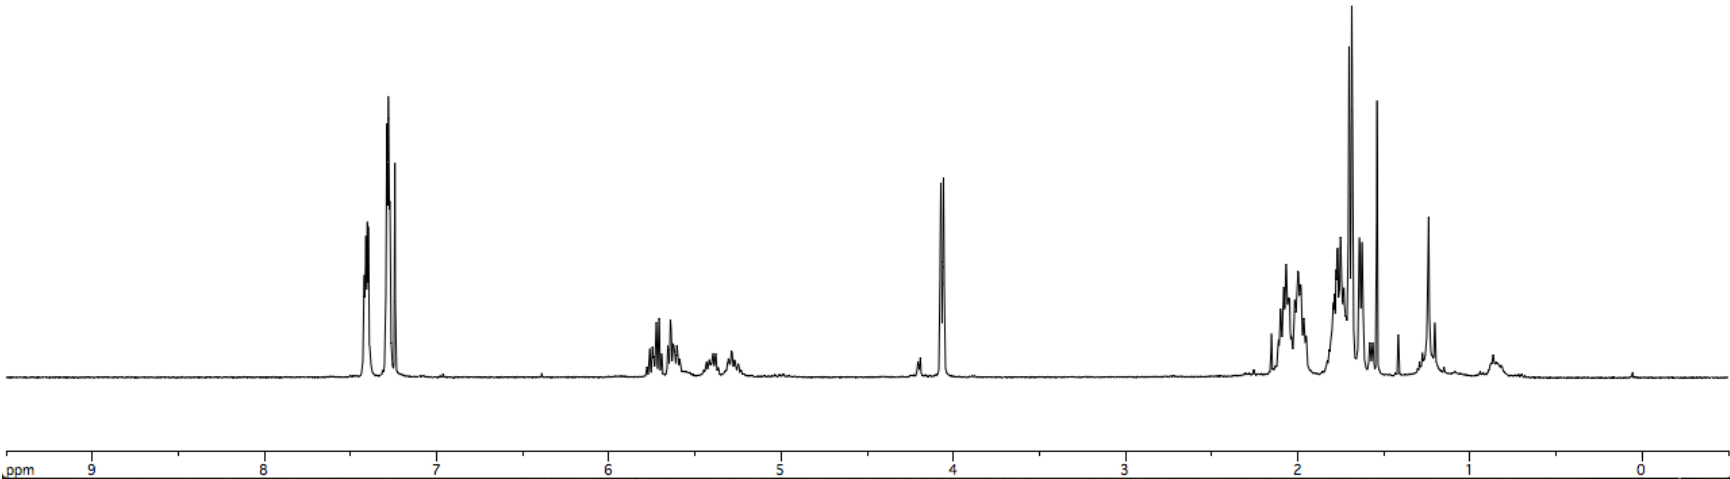

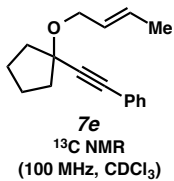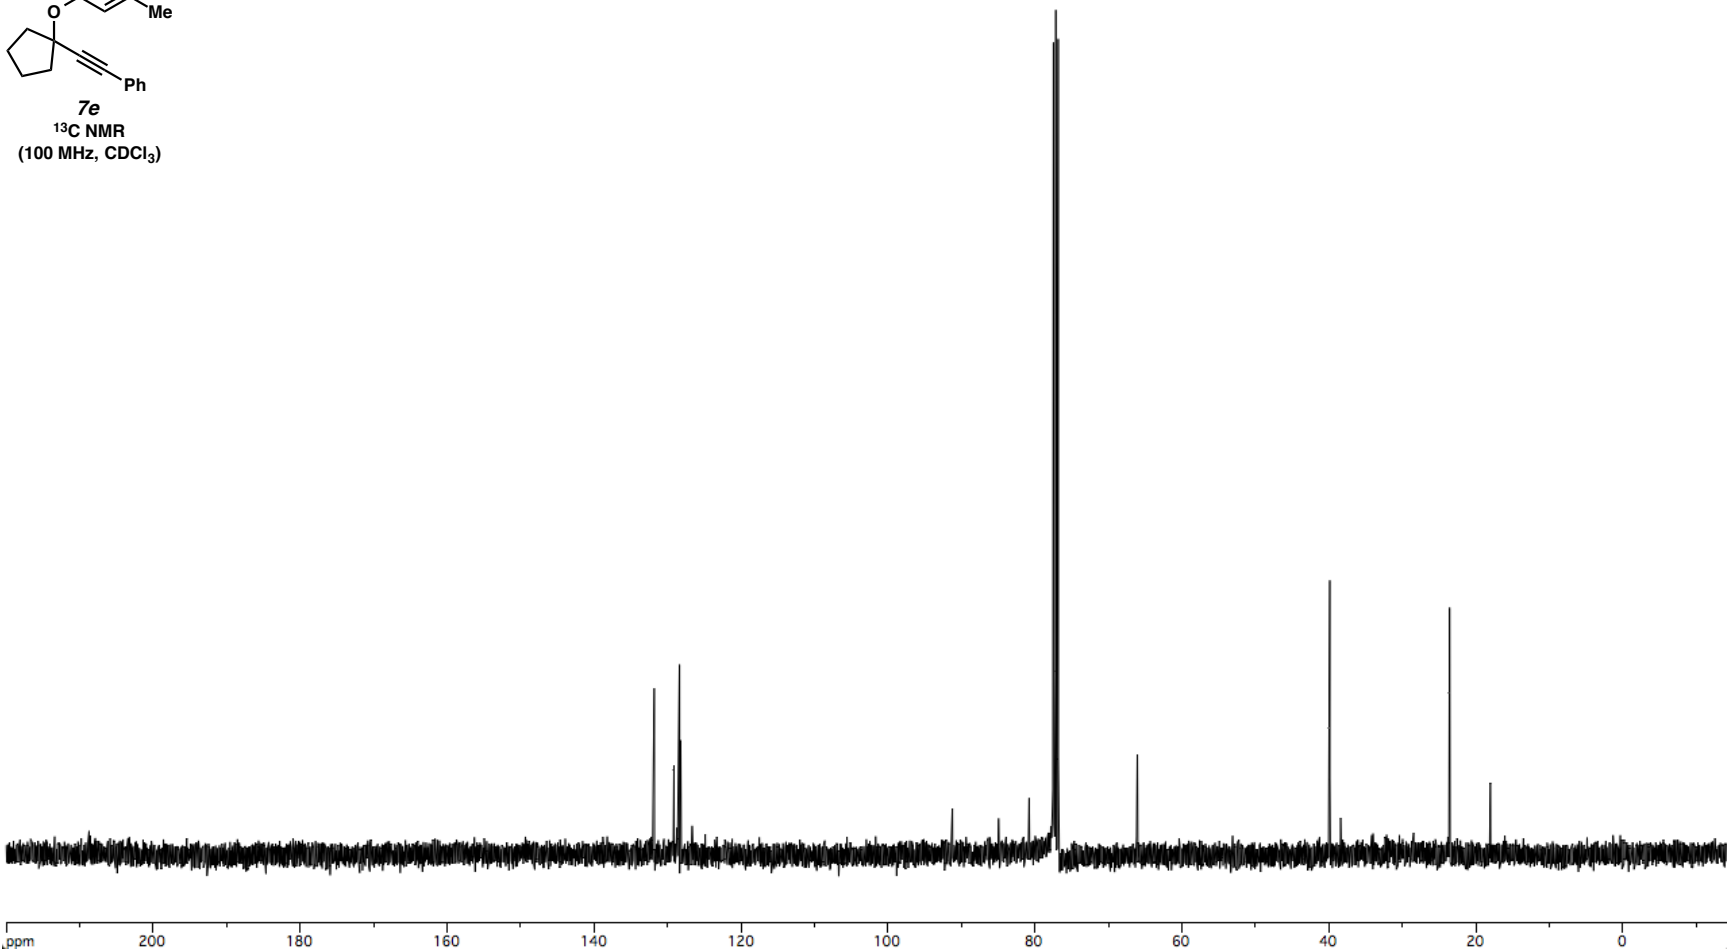

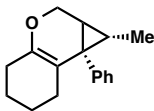

**8e**  
**<sup>1</sup>H NMR**  
**(400 MHz, C<sub>6</sub>D<sub>6</sub>)**

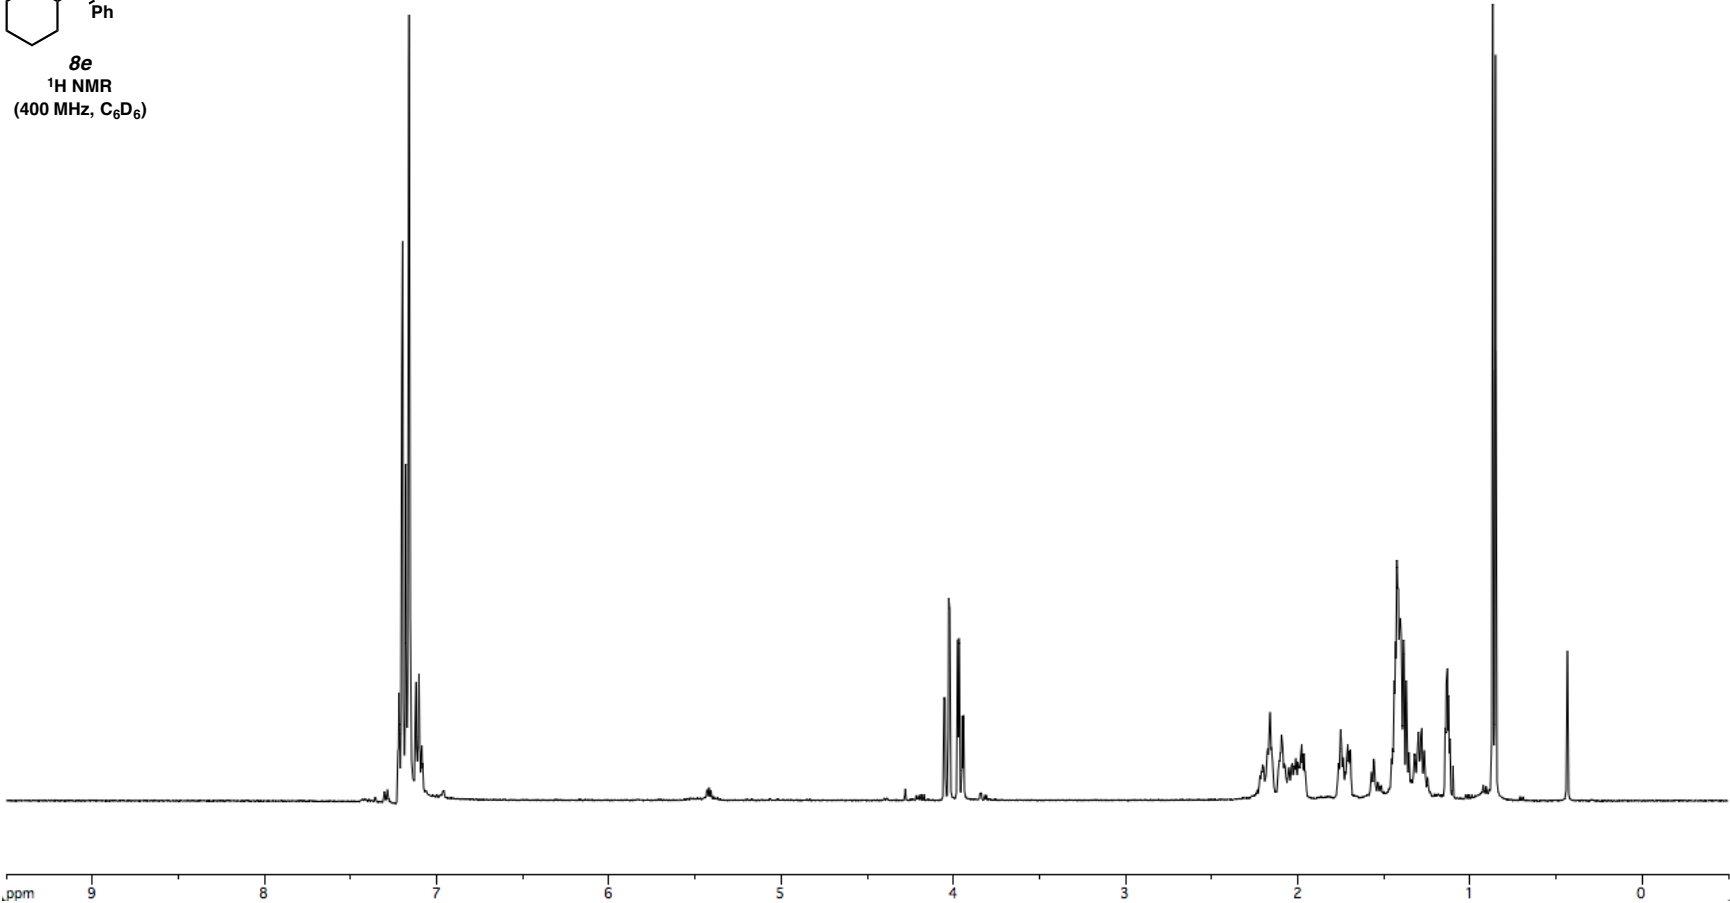

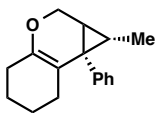

**8e**  
<sup>13</sup>C NMR  
(100 MHz, C<sub>6</sub>D<sub>6</sub>)

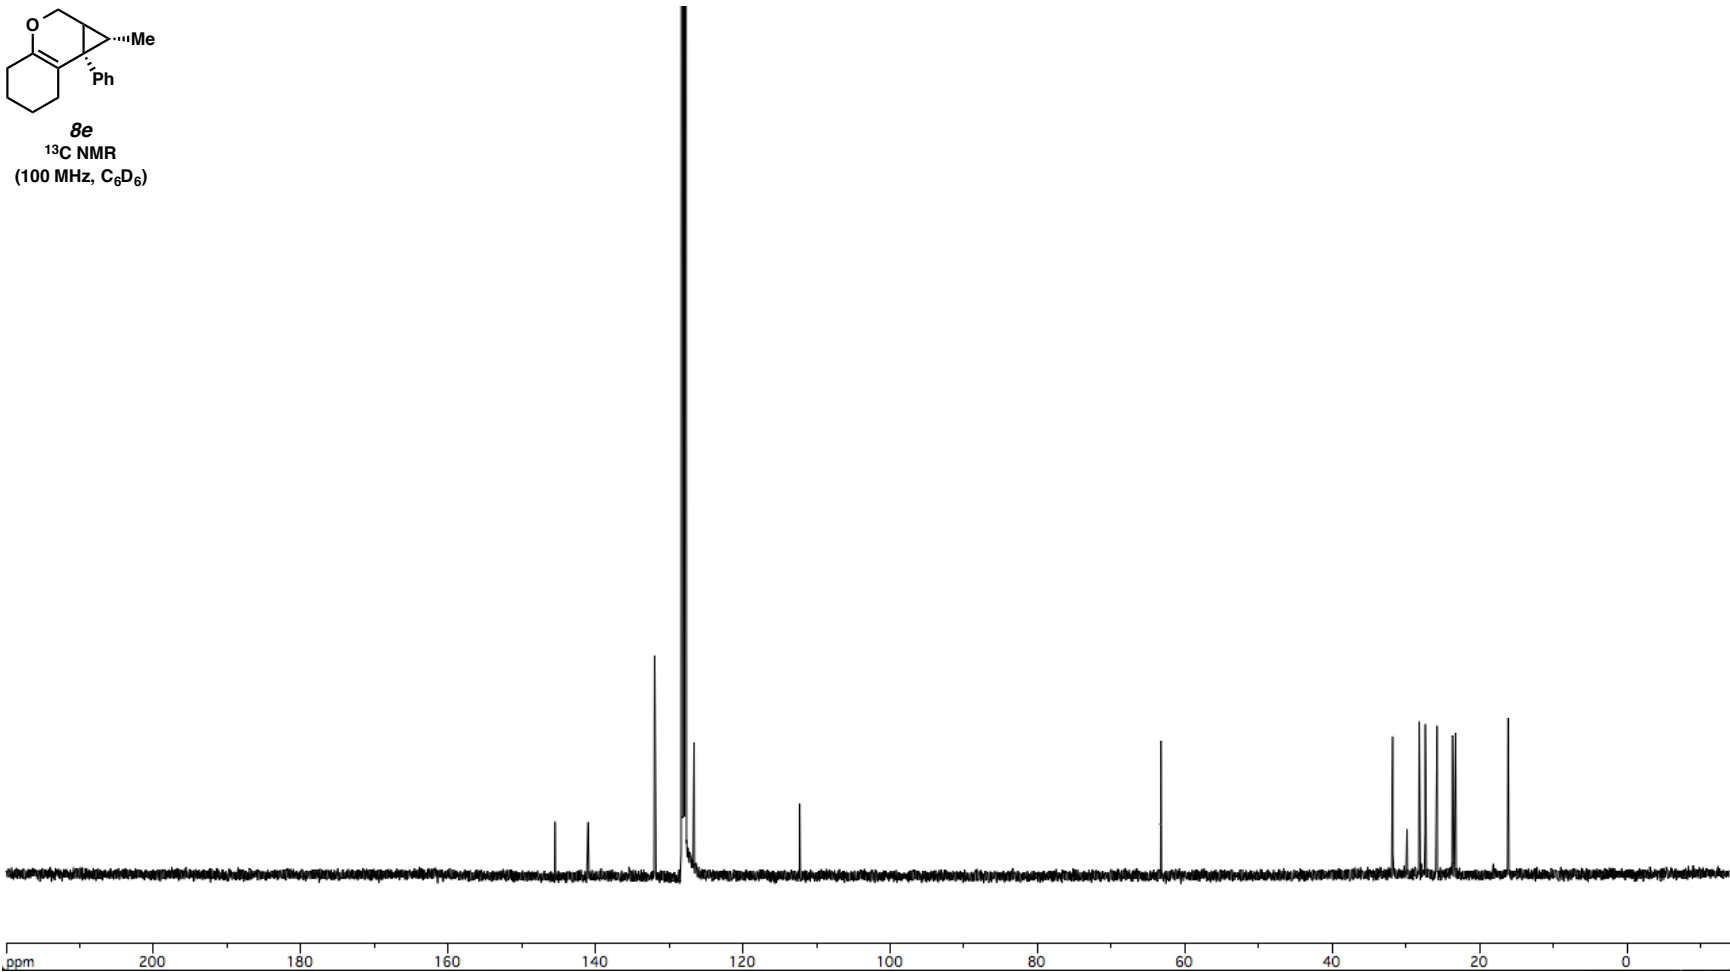

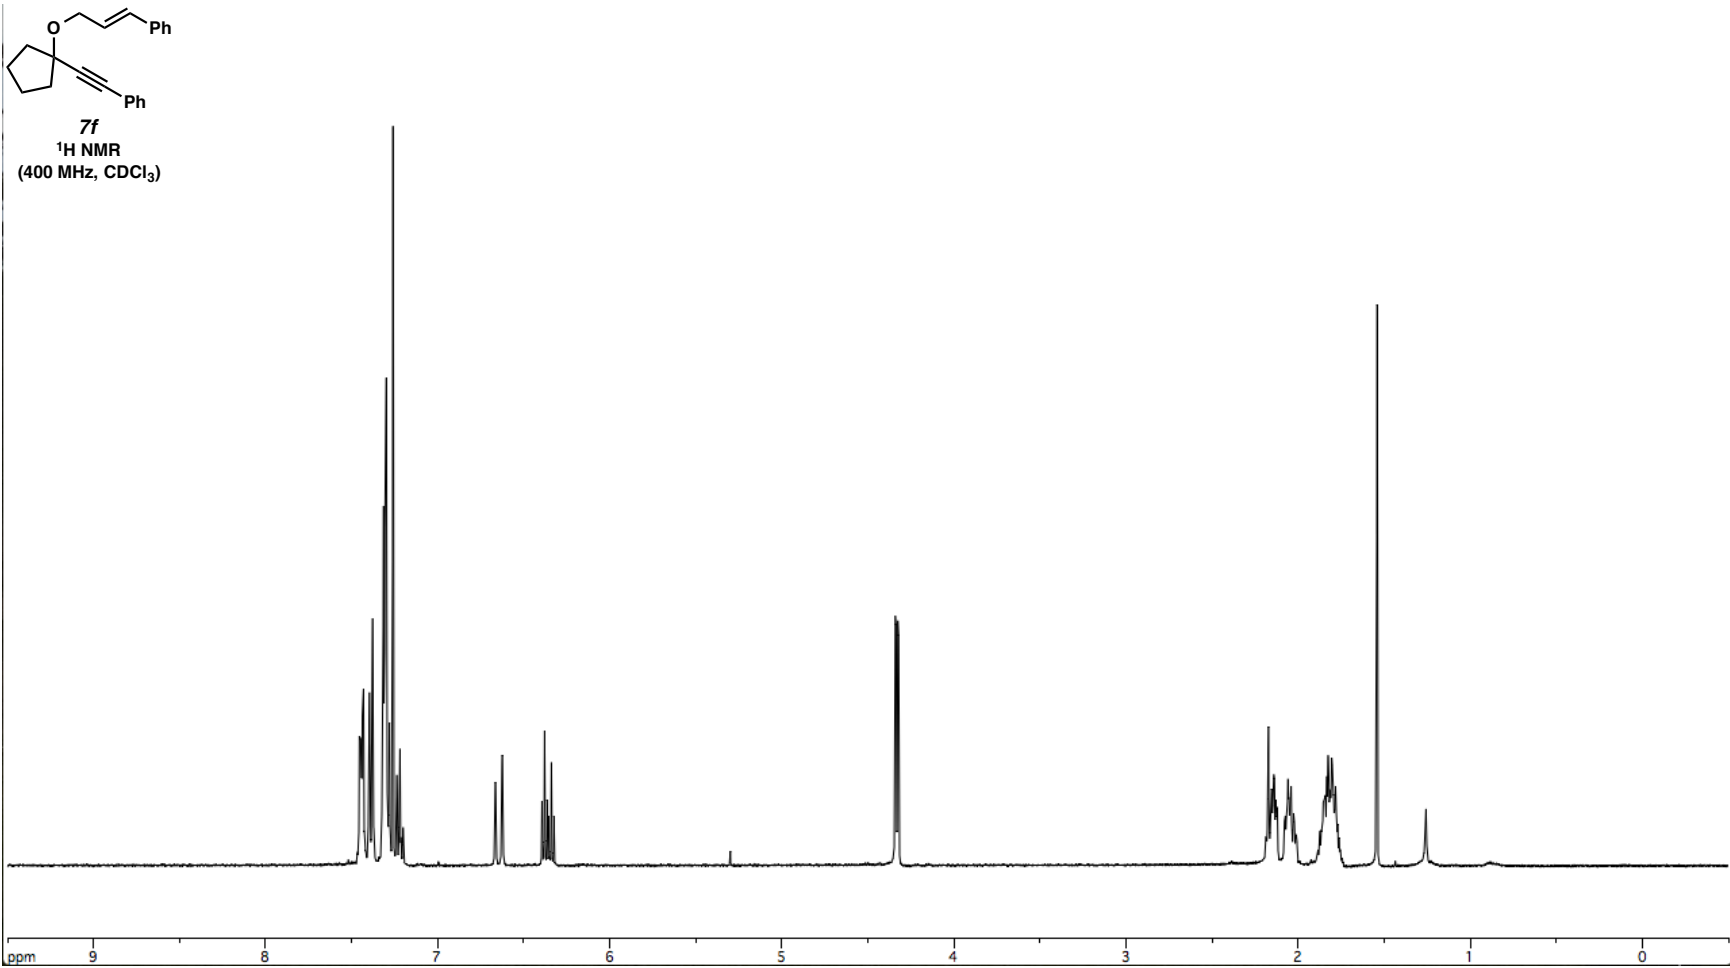

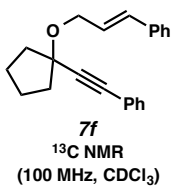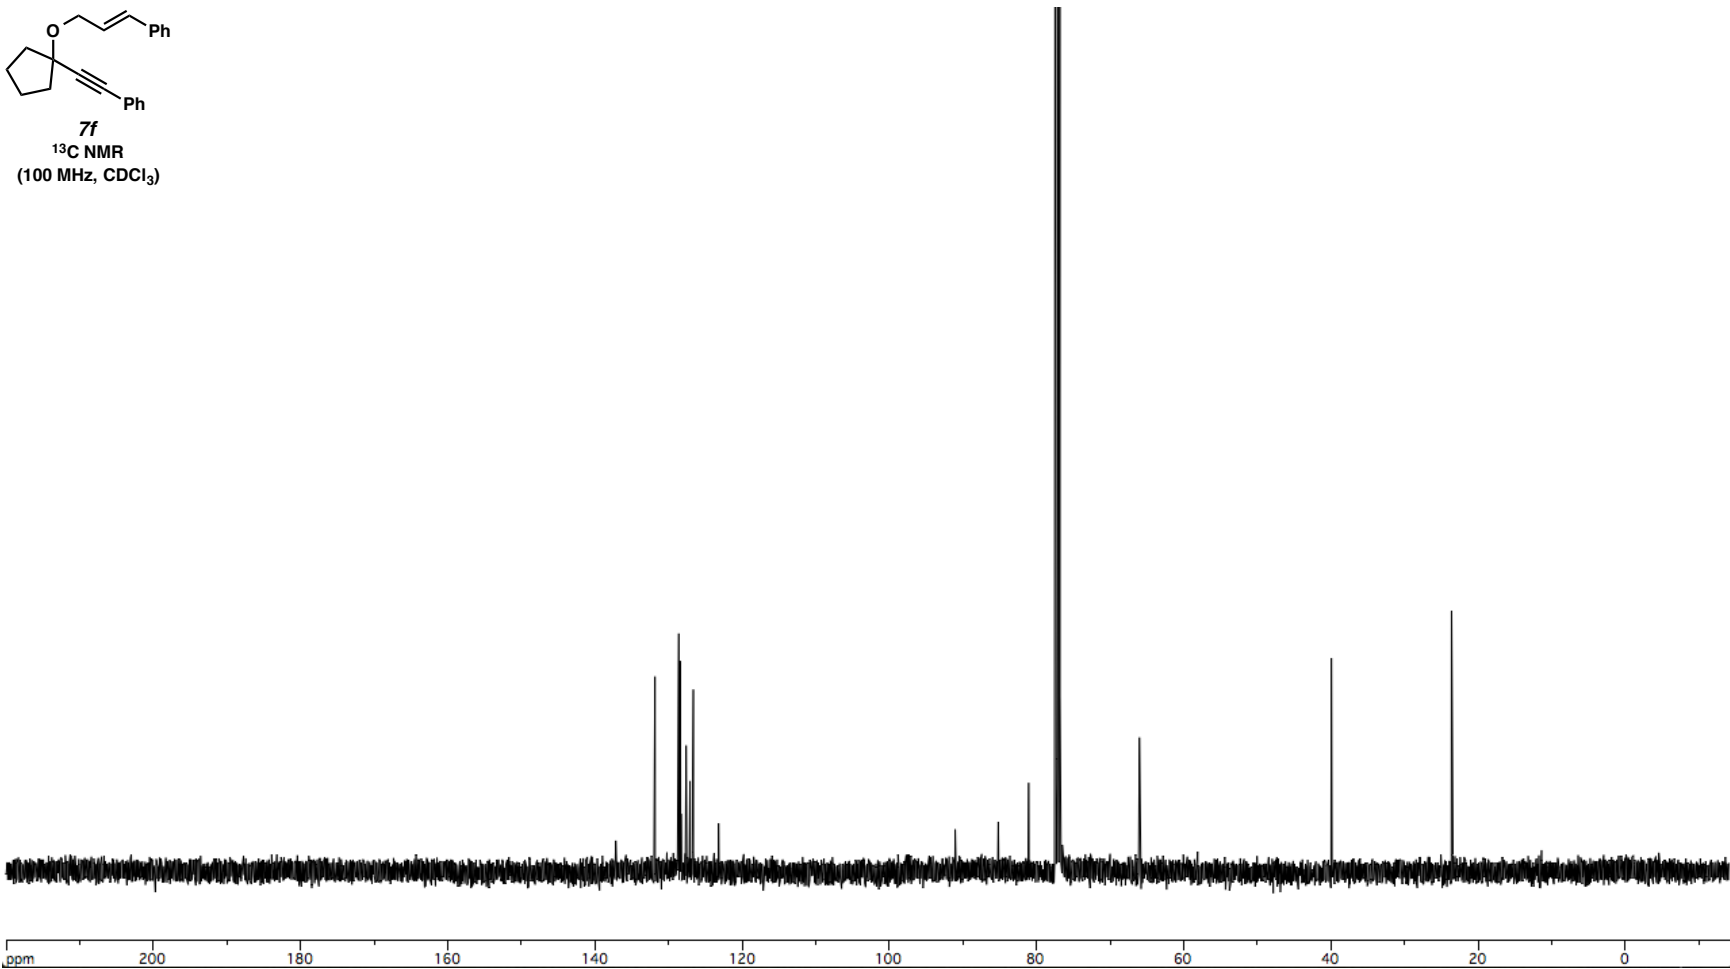

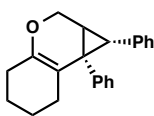



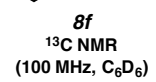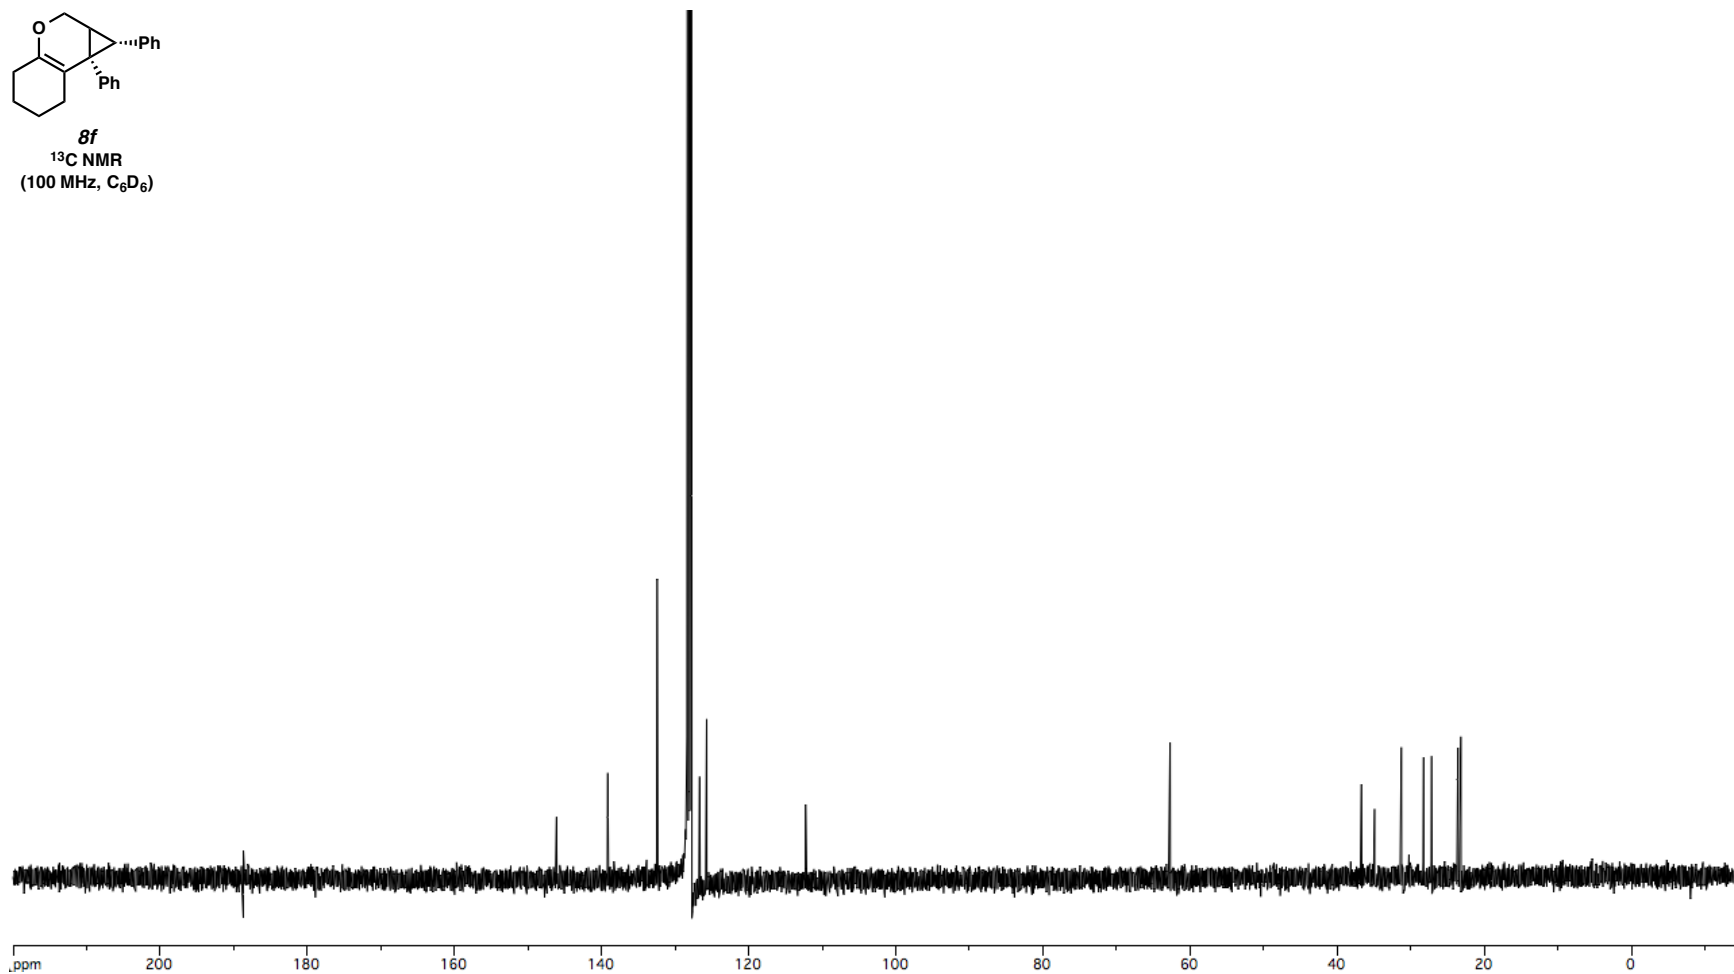

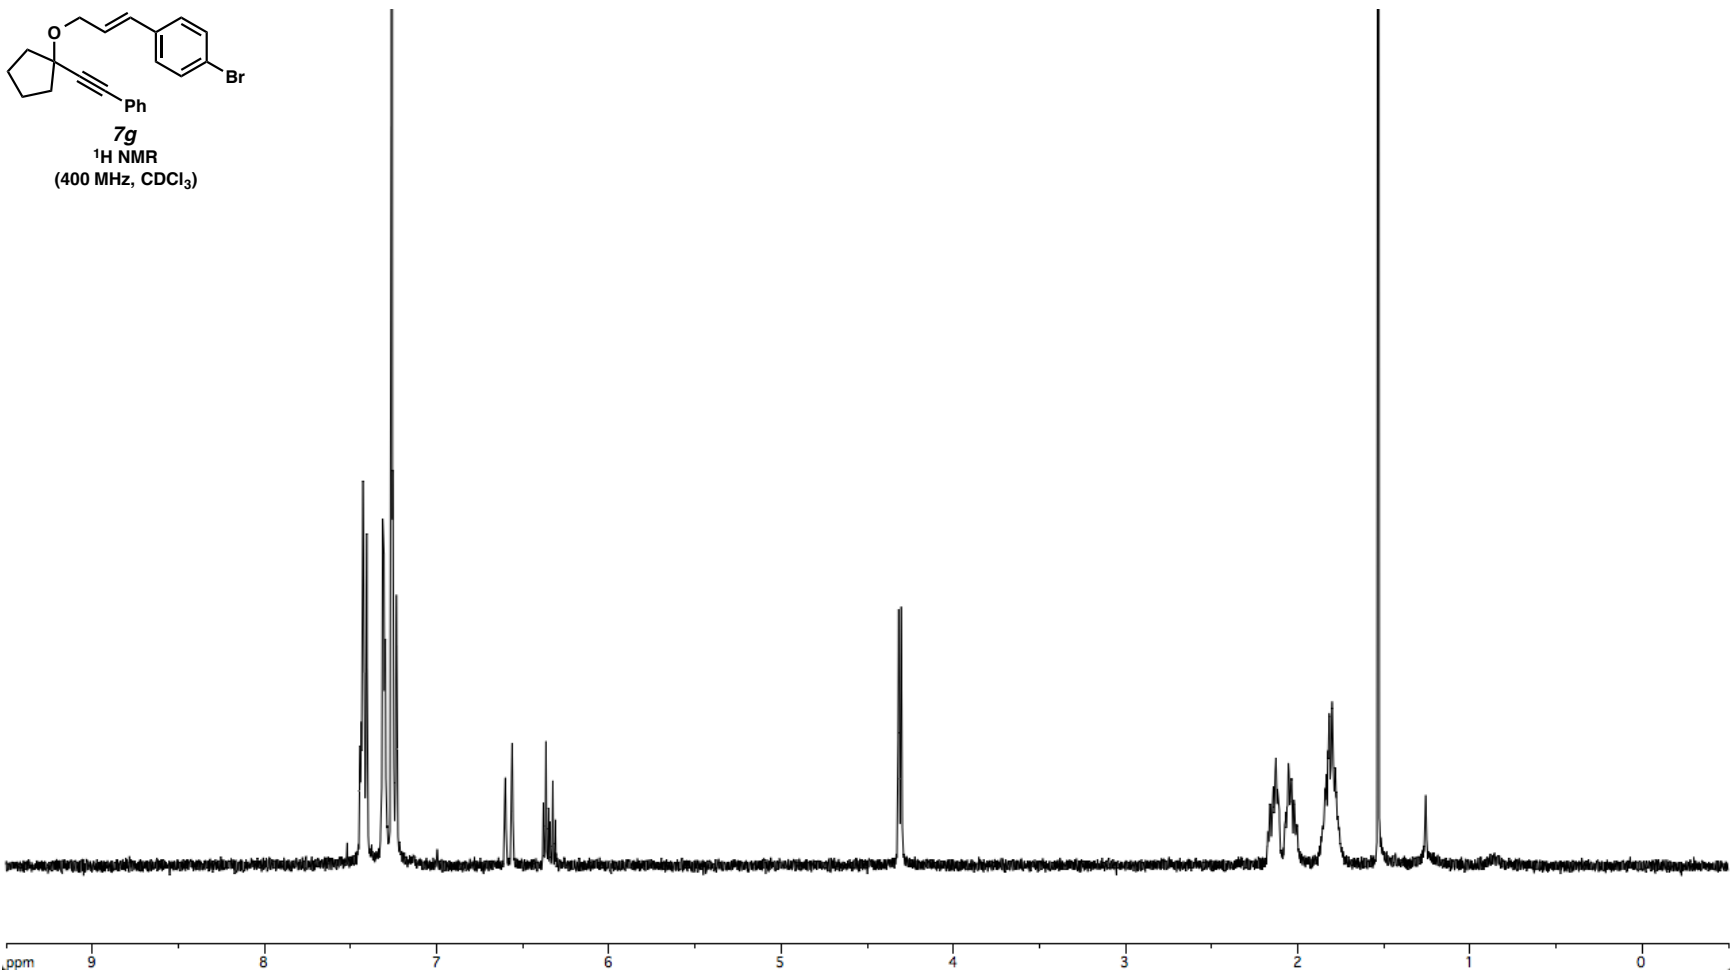

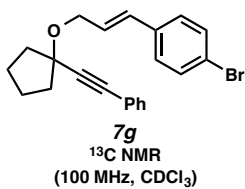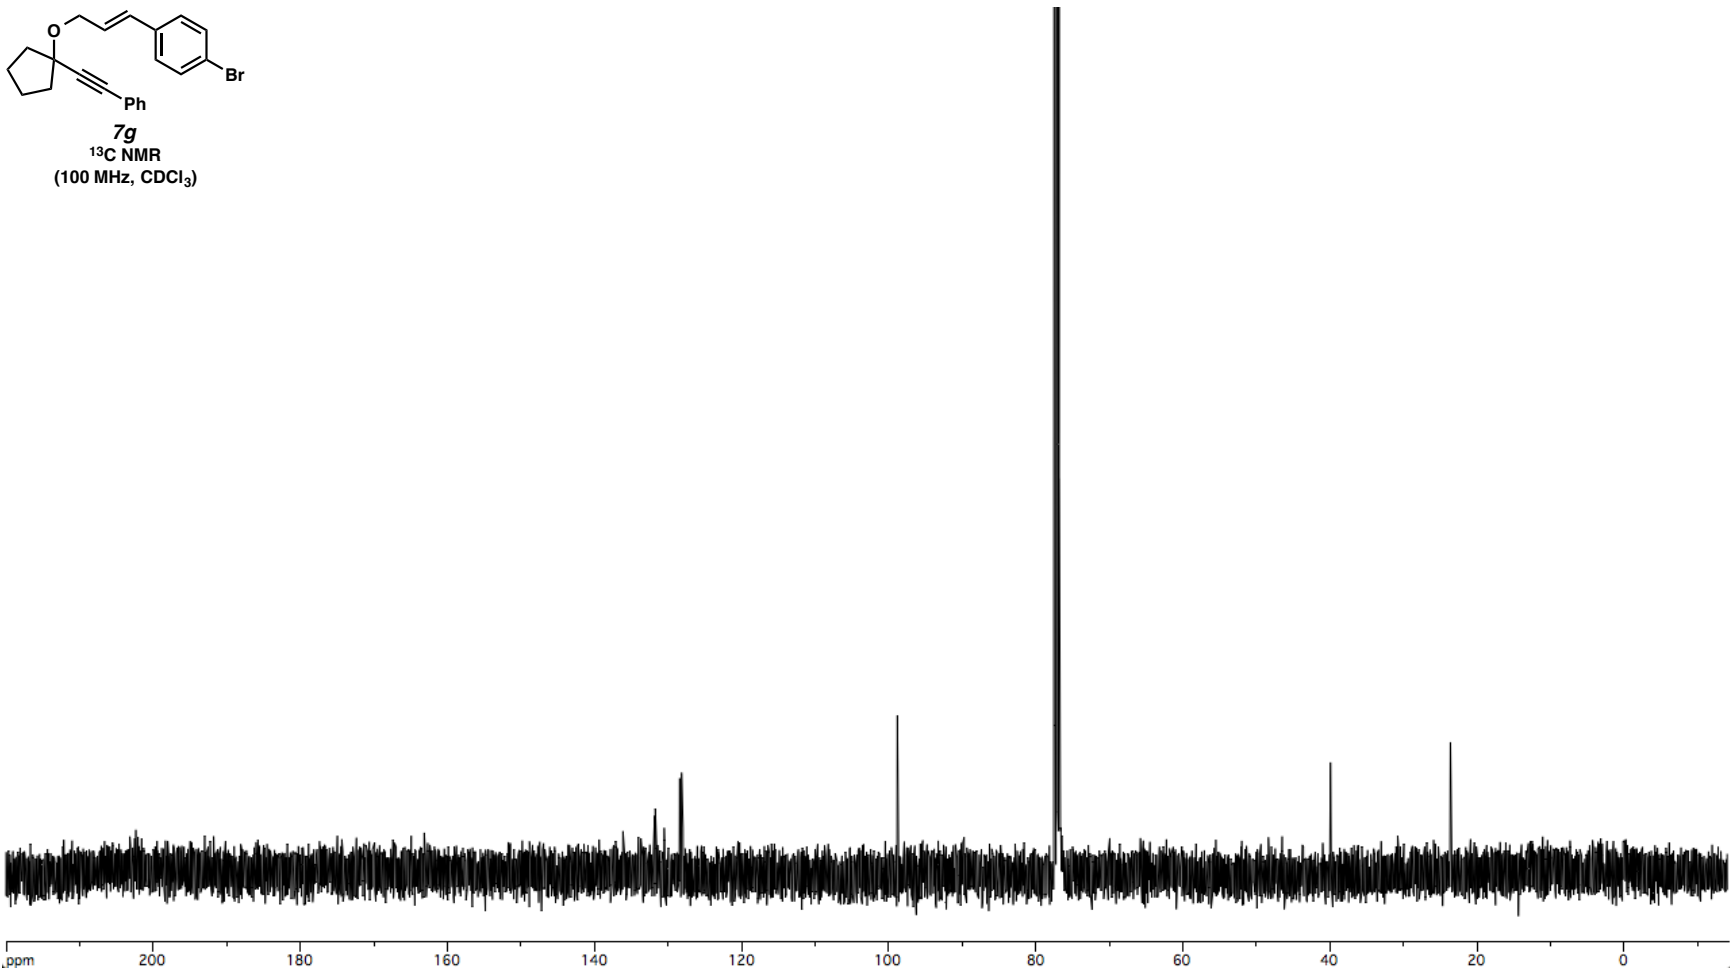

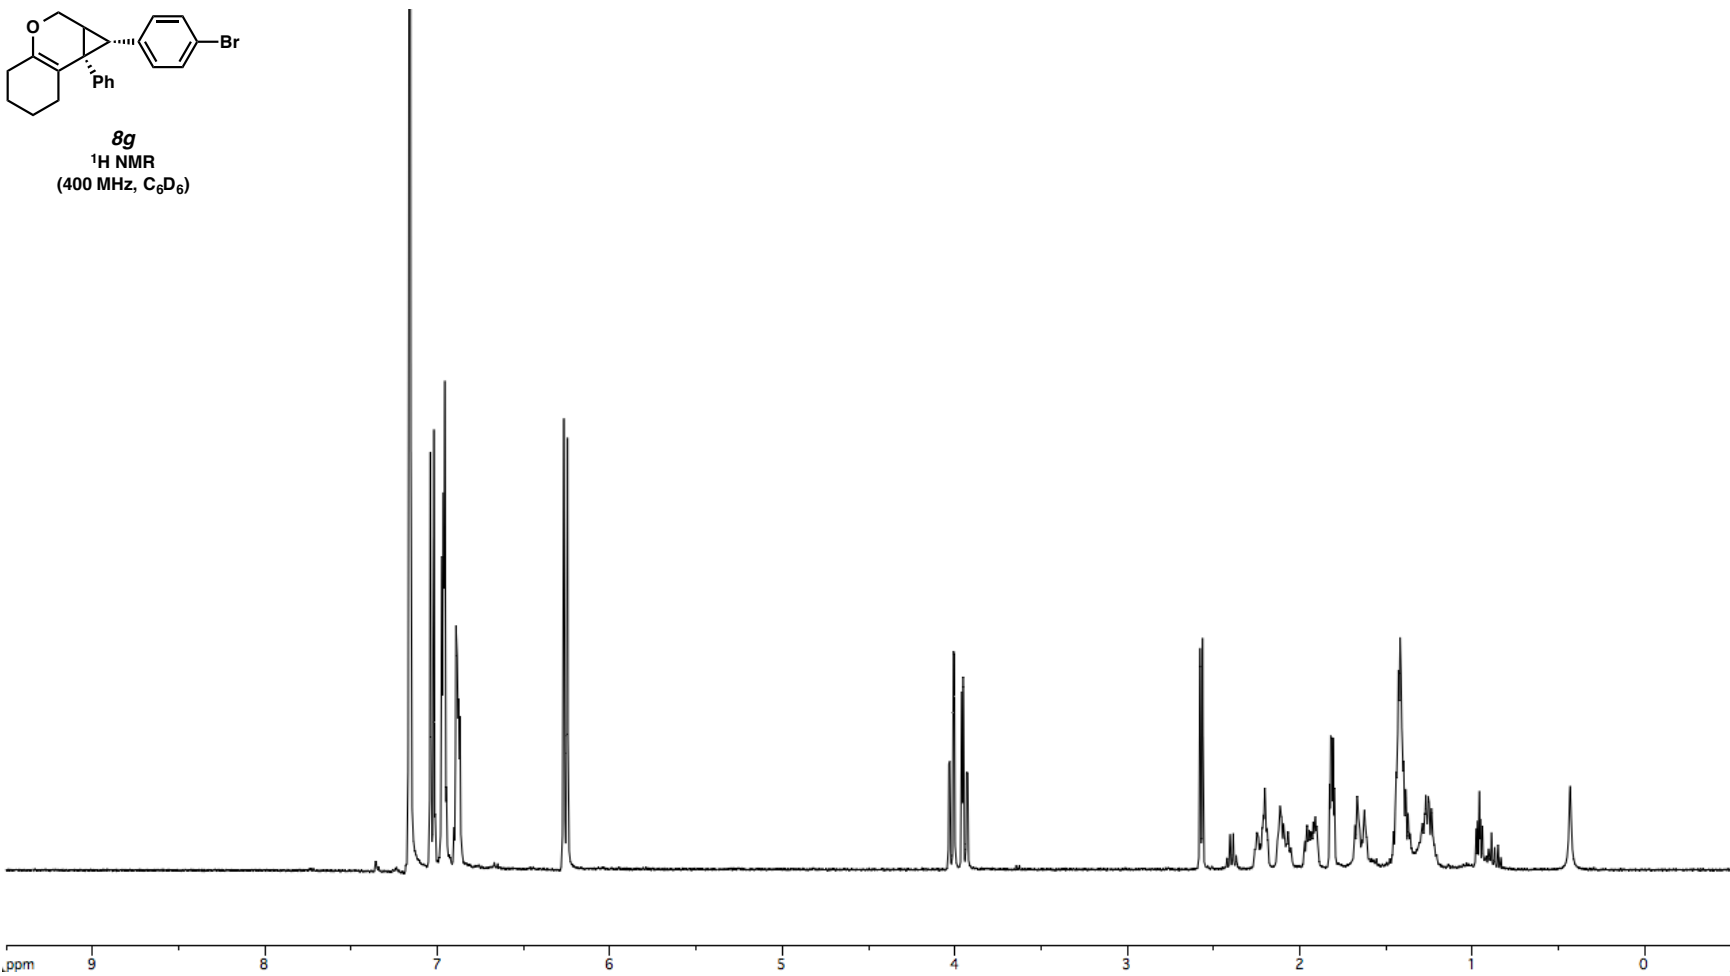

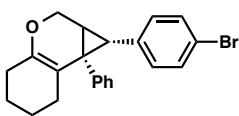

**8g**  
<sup>13</sup>C NMR  
(100 MHz, C<sub>6</sub>D<sub>6</sub>)

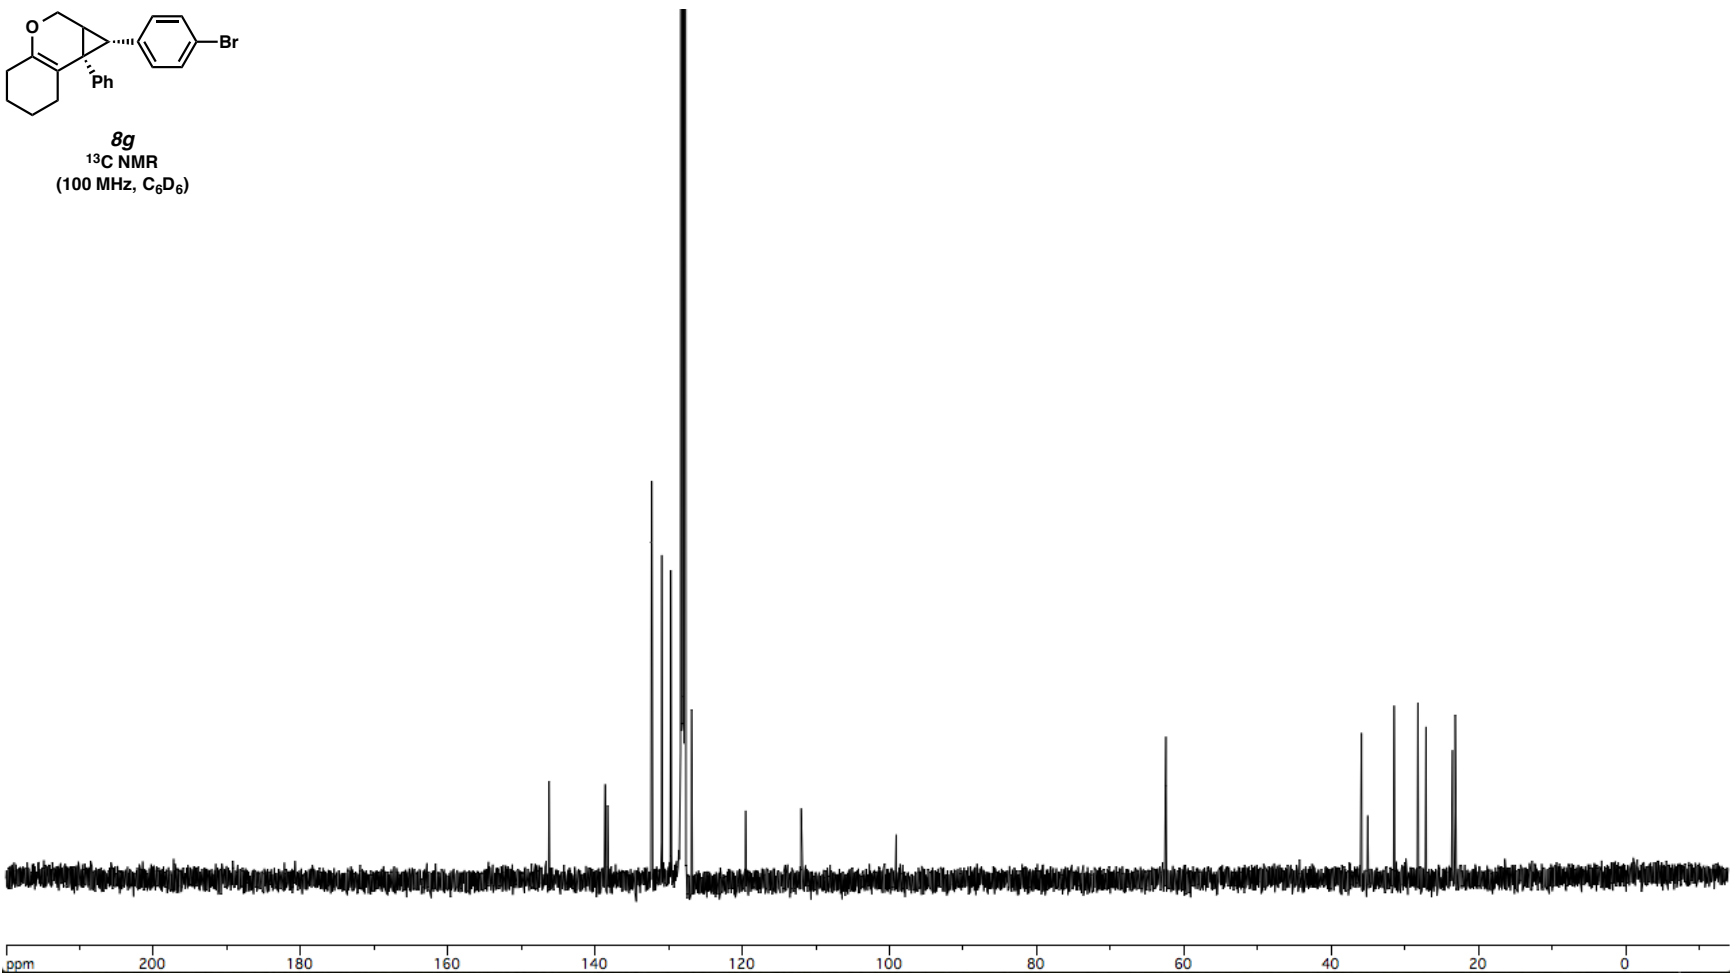

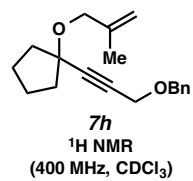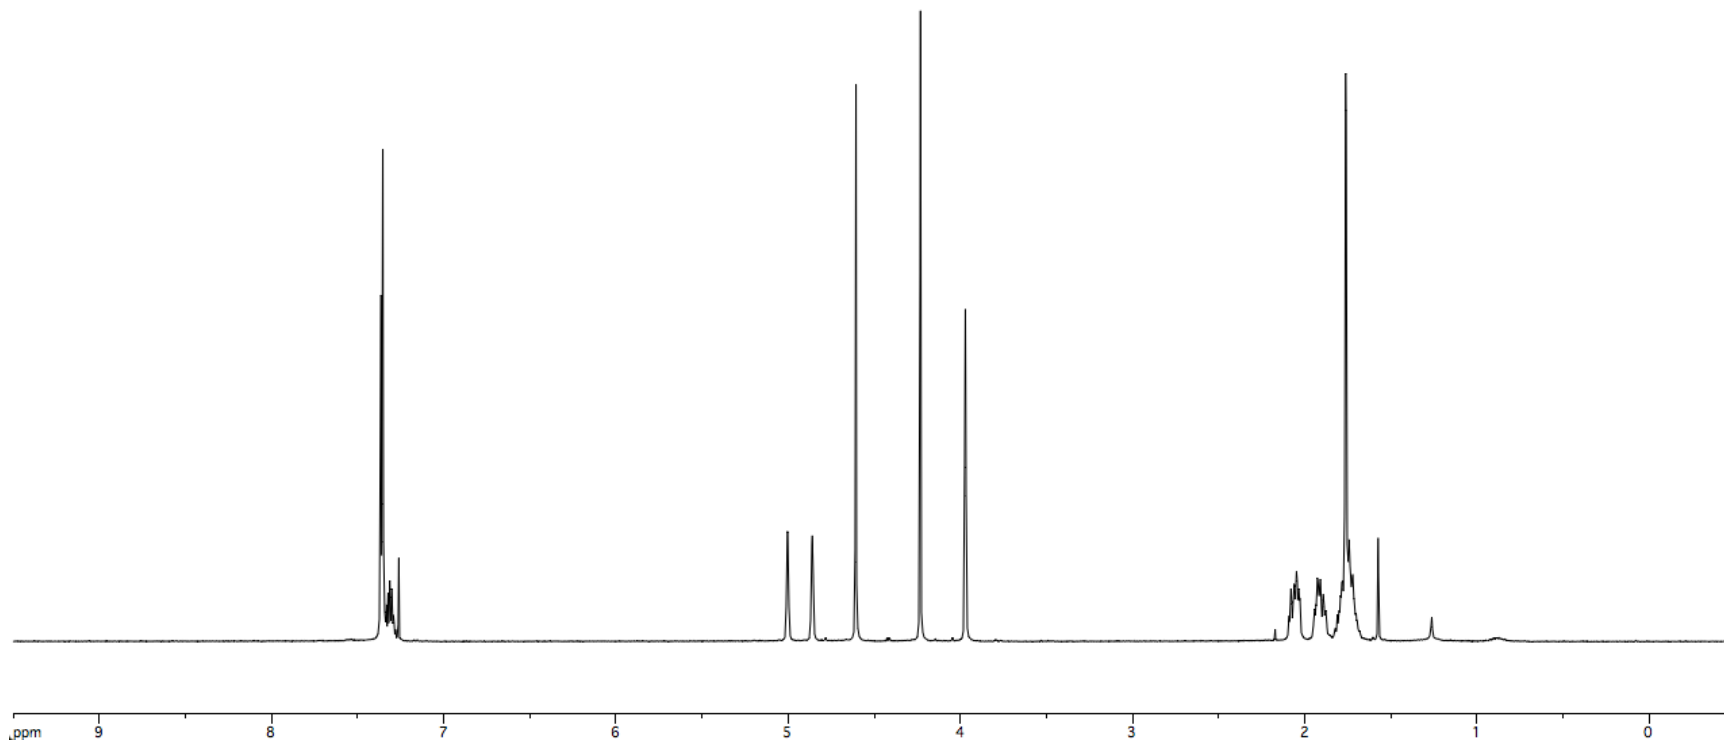

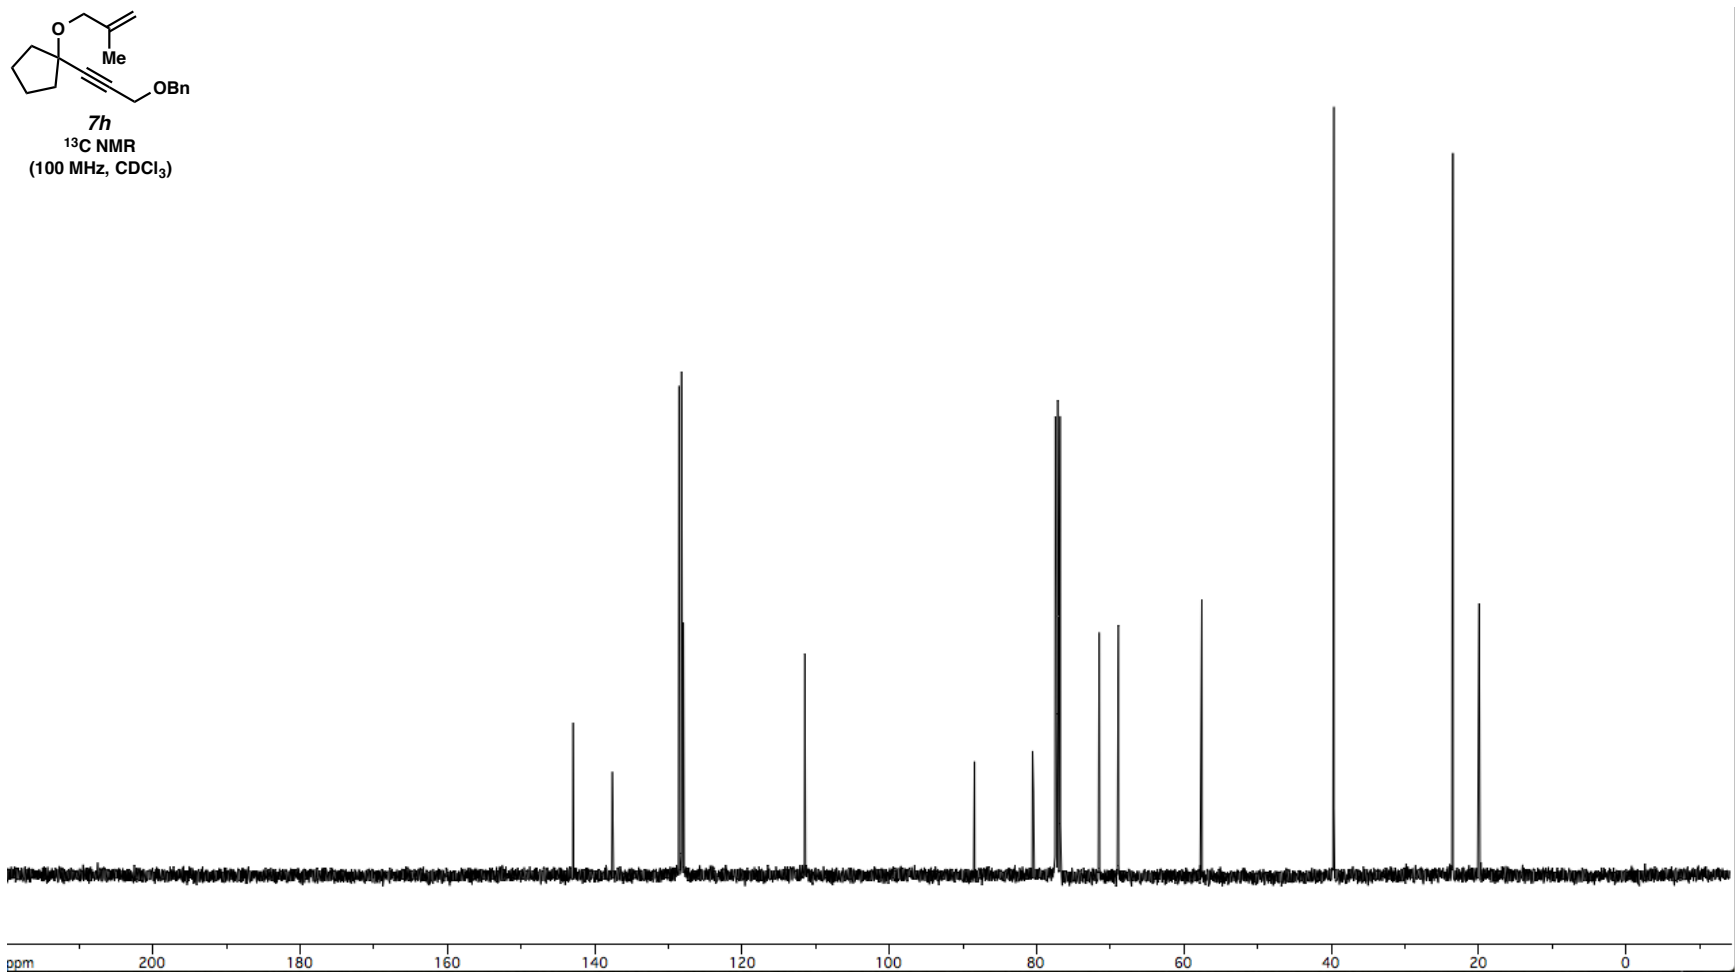

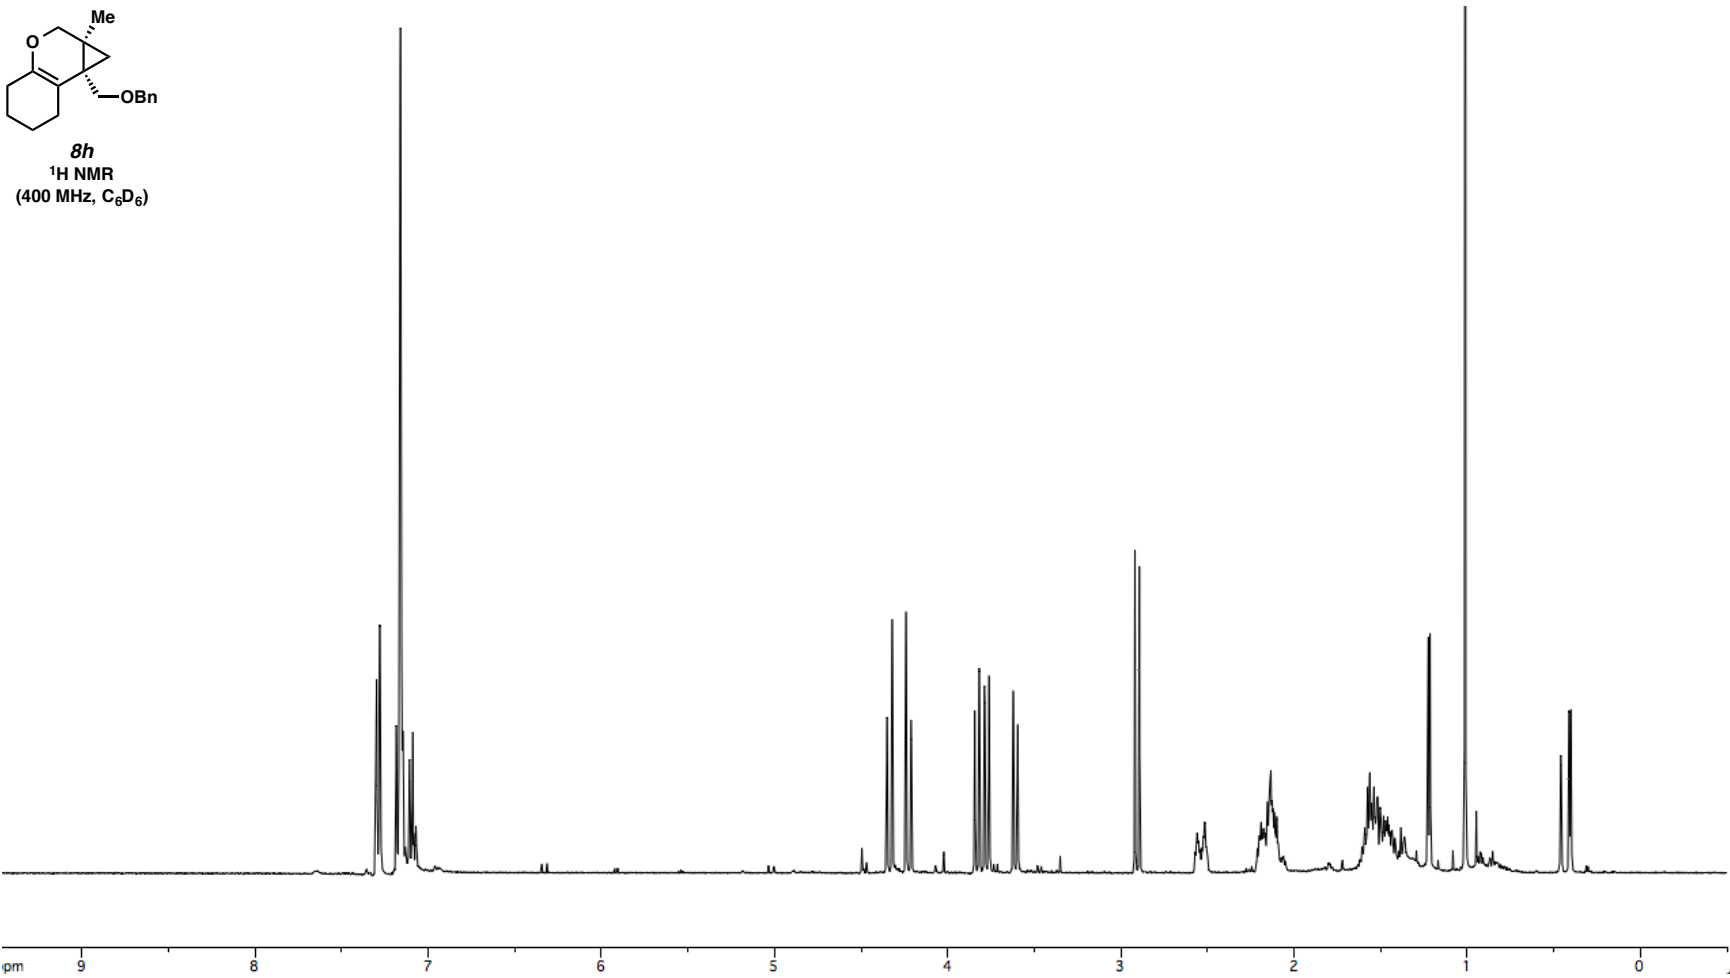



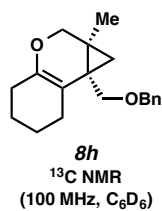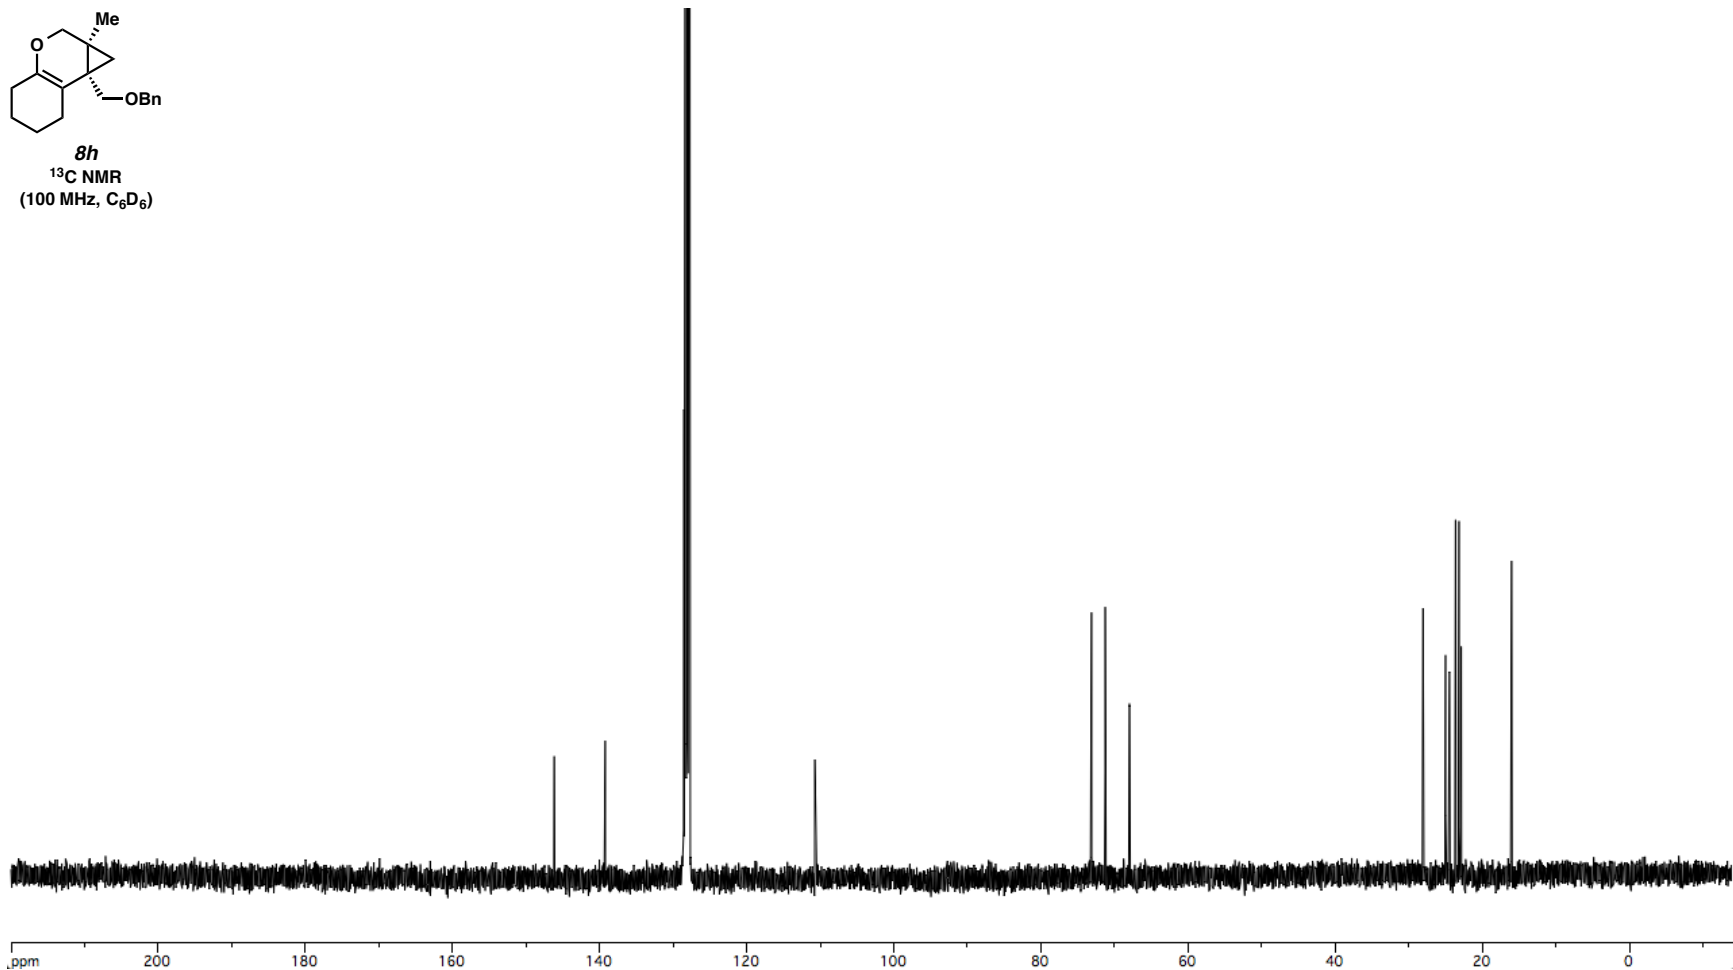

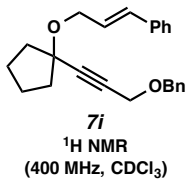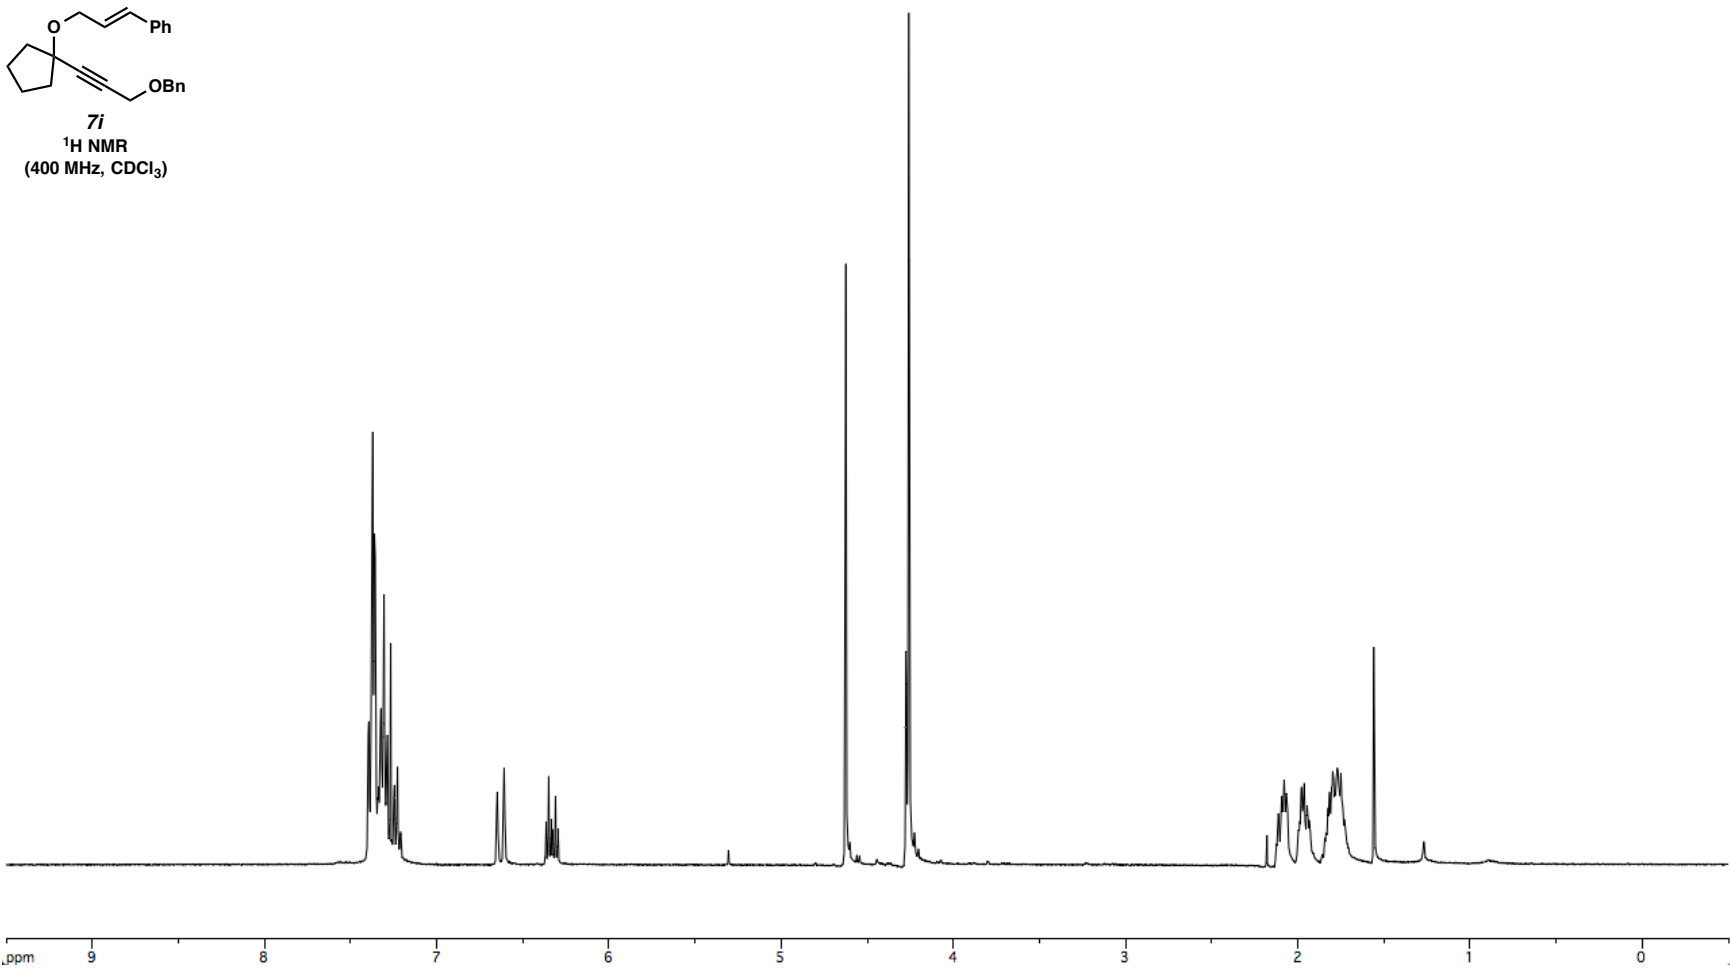

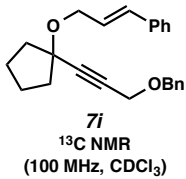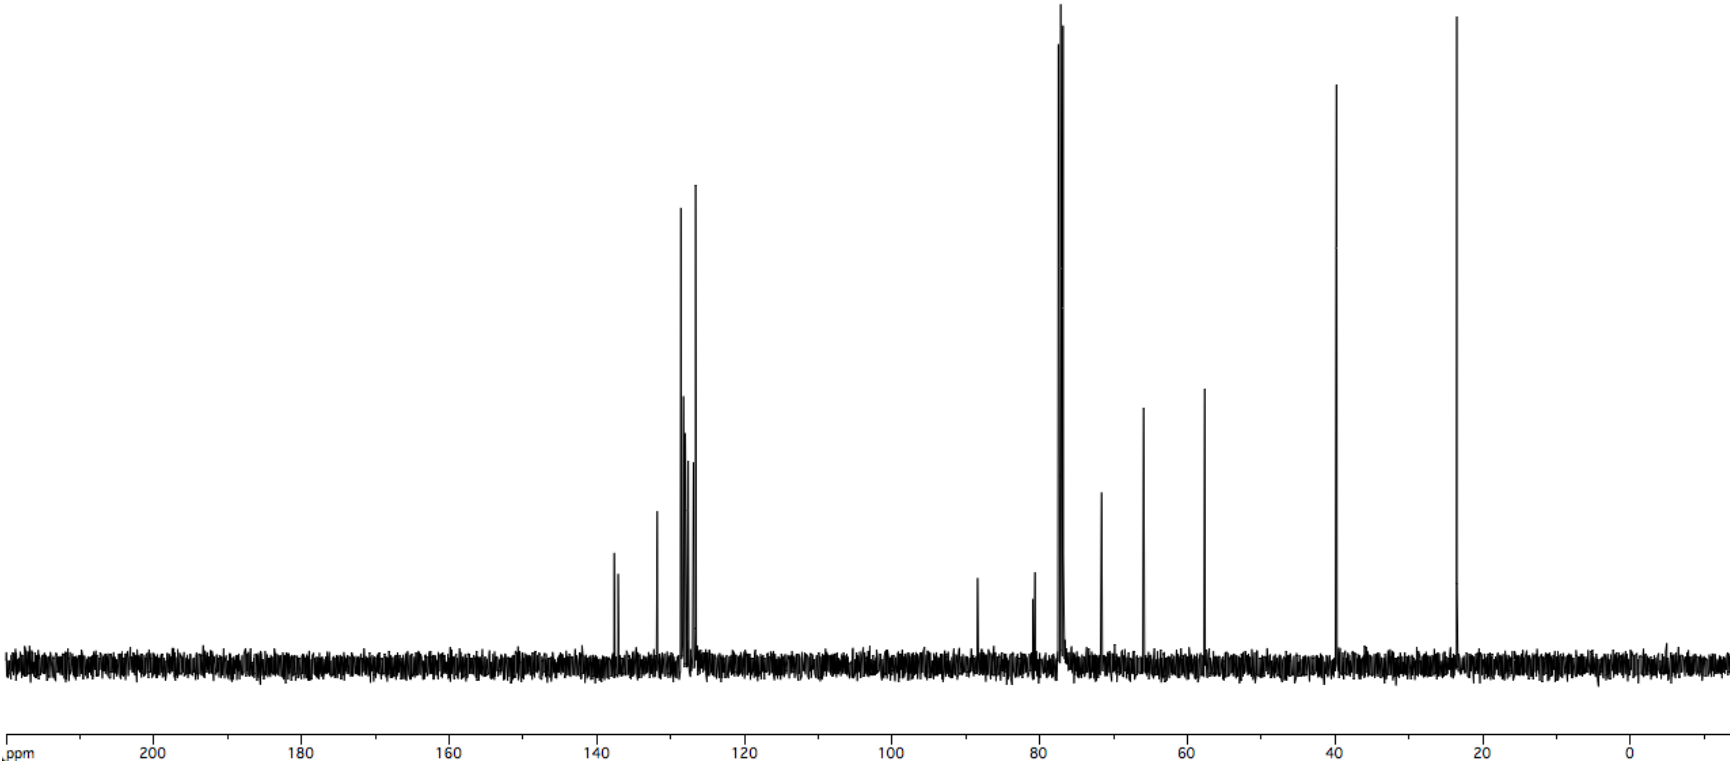

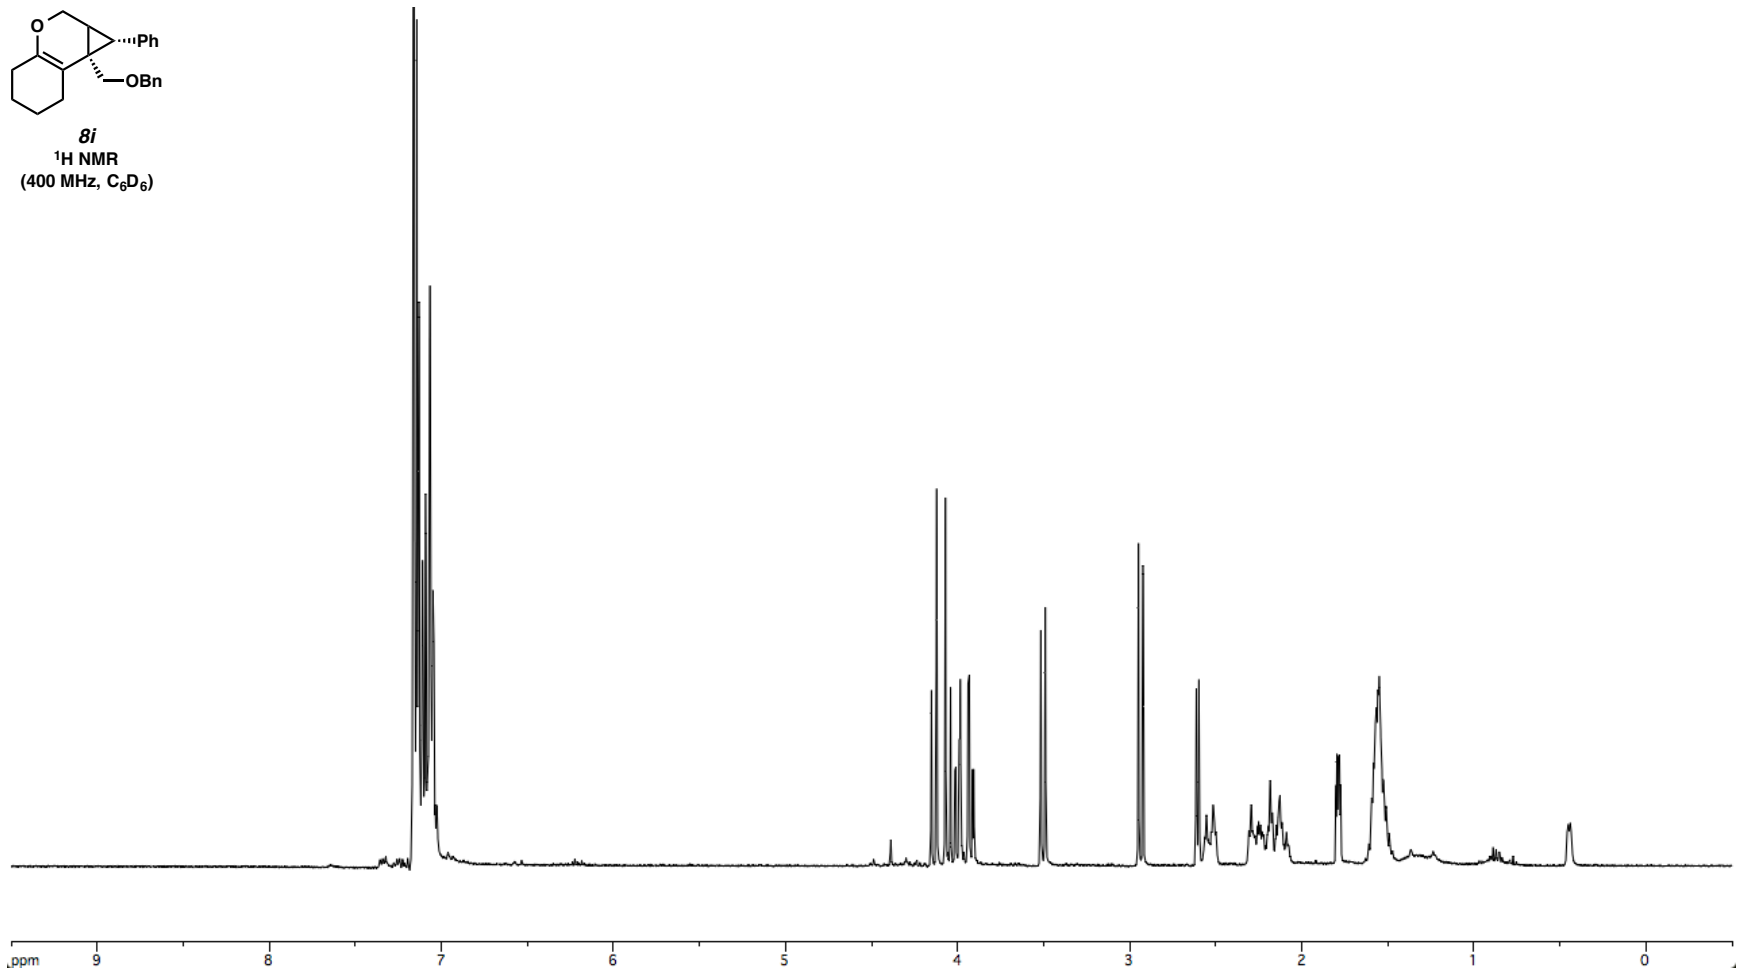

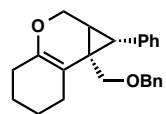

**8i**  
<sup>13</sup>C NMR  
(100 MHz, C<sub>6</sub>D<sub>6</sub>)

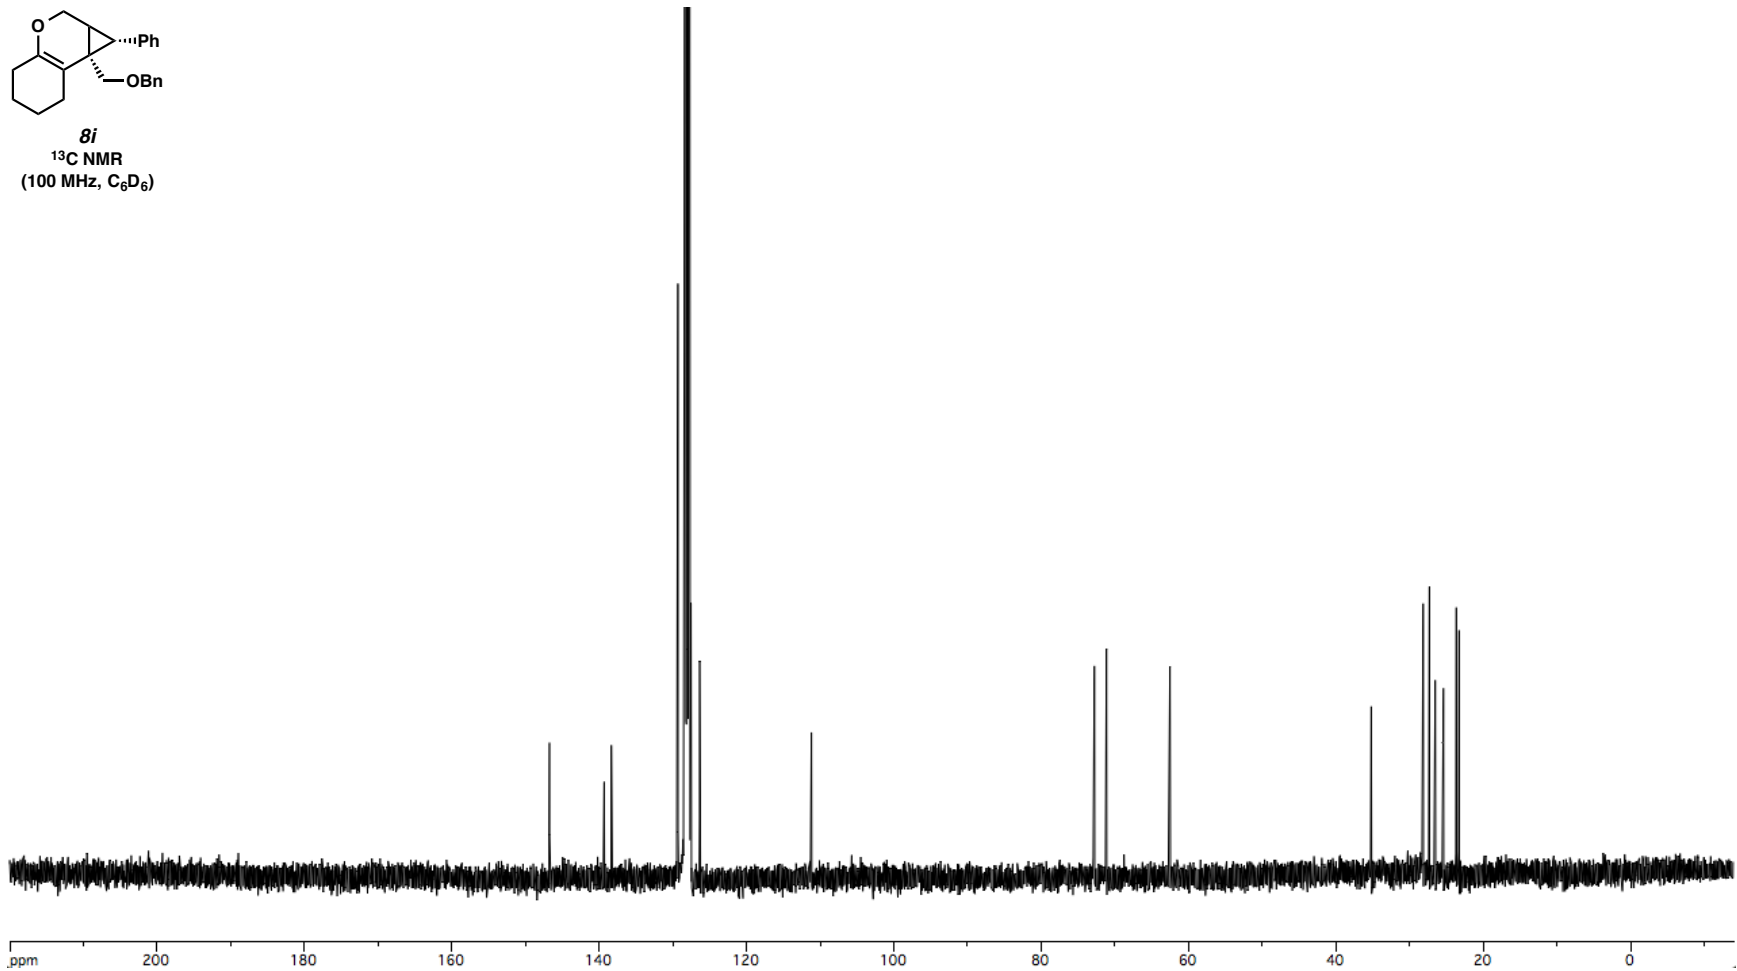

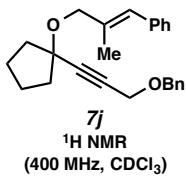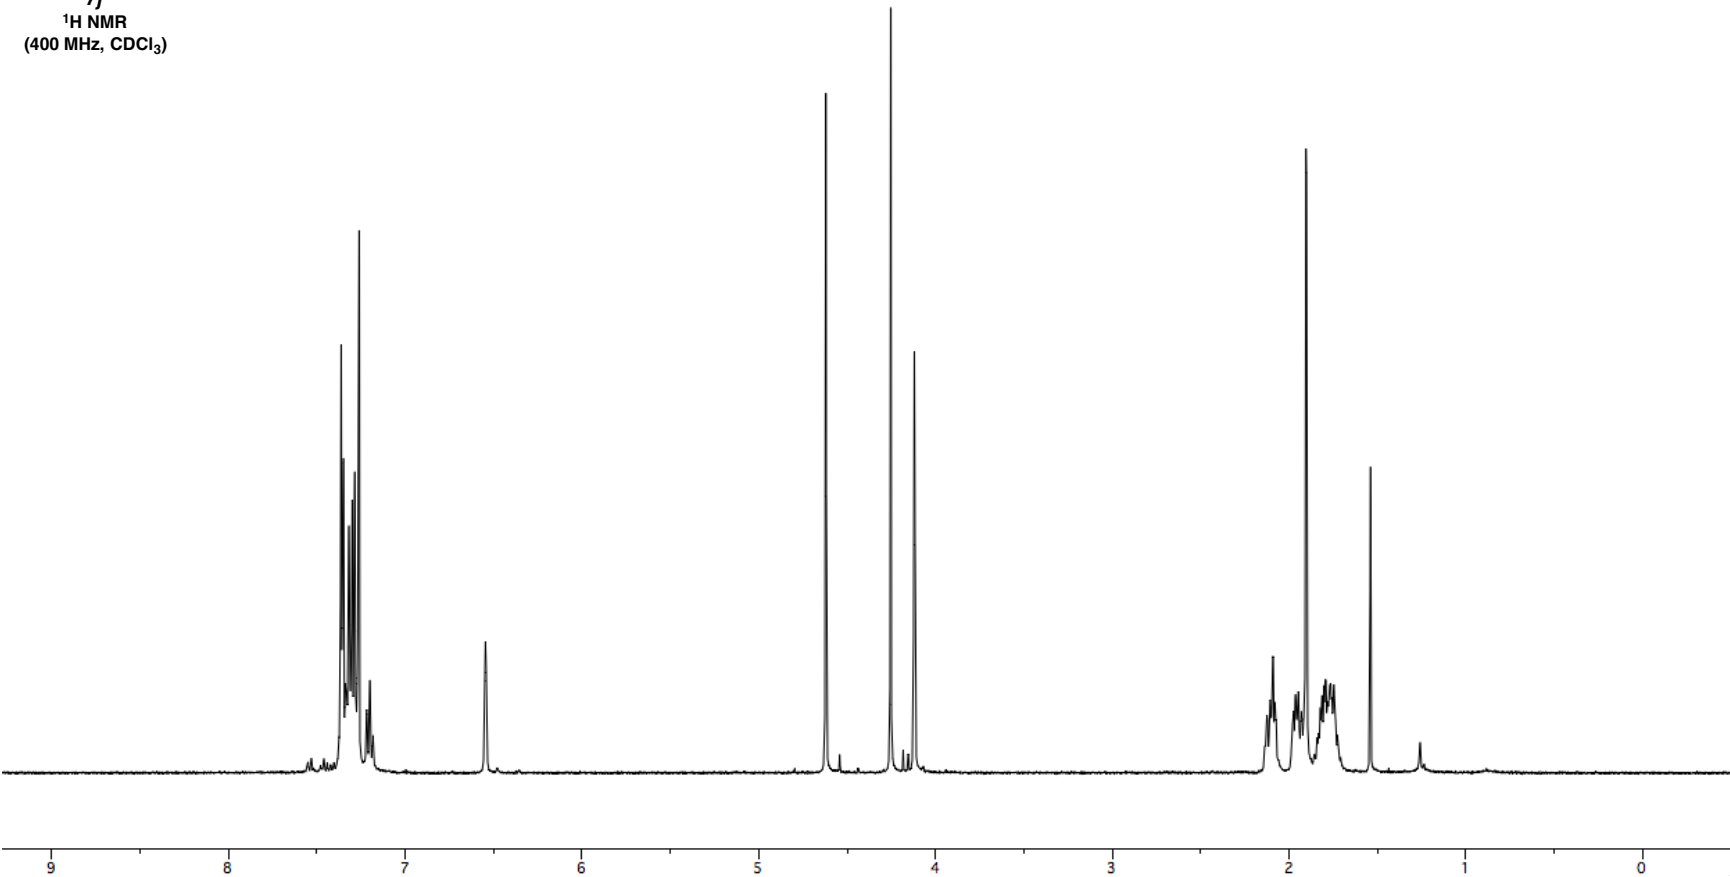

S83

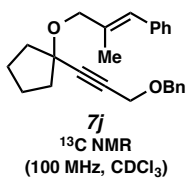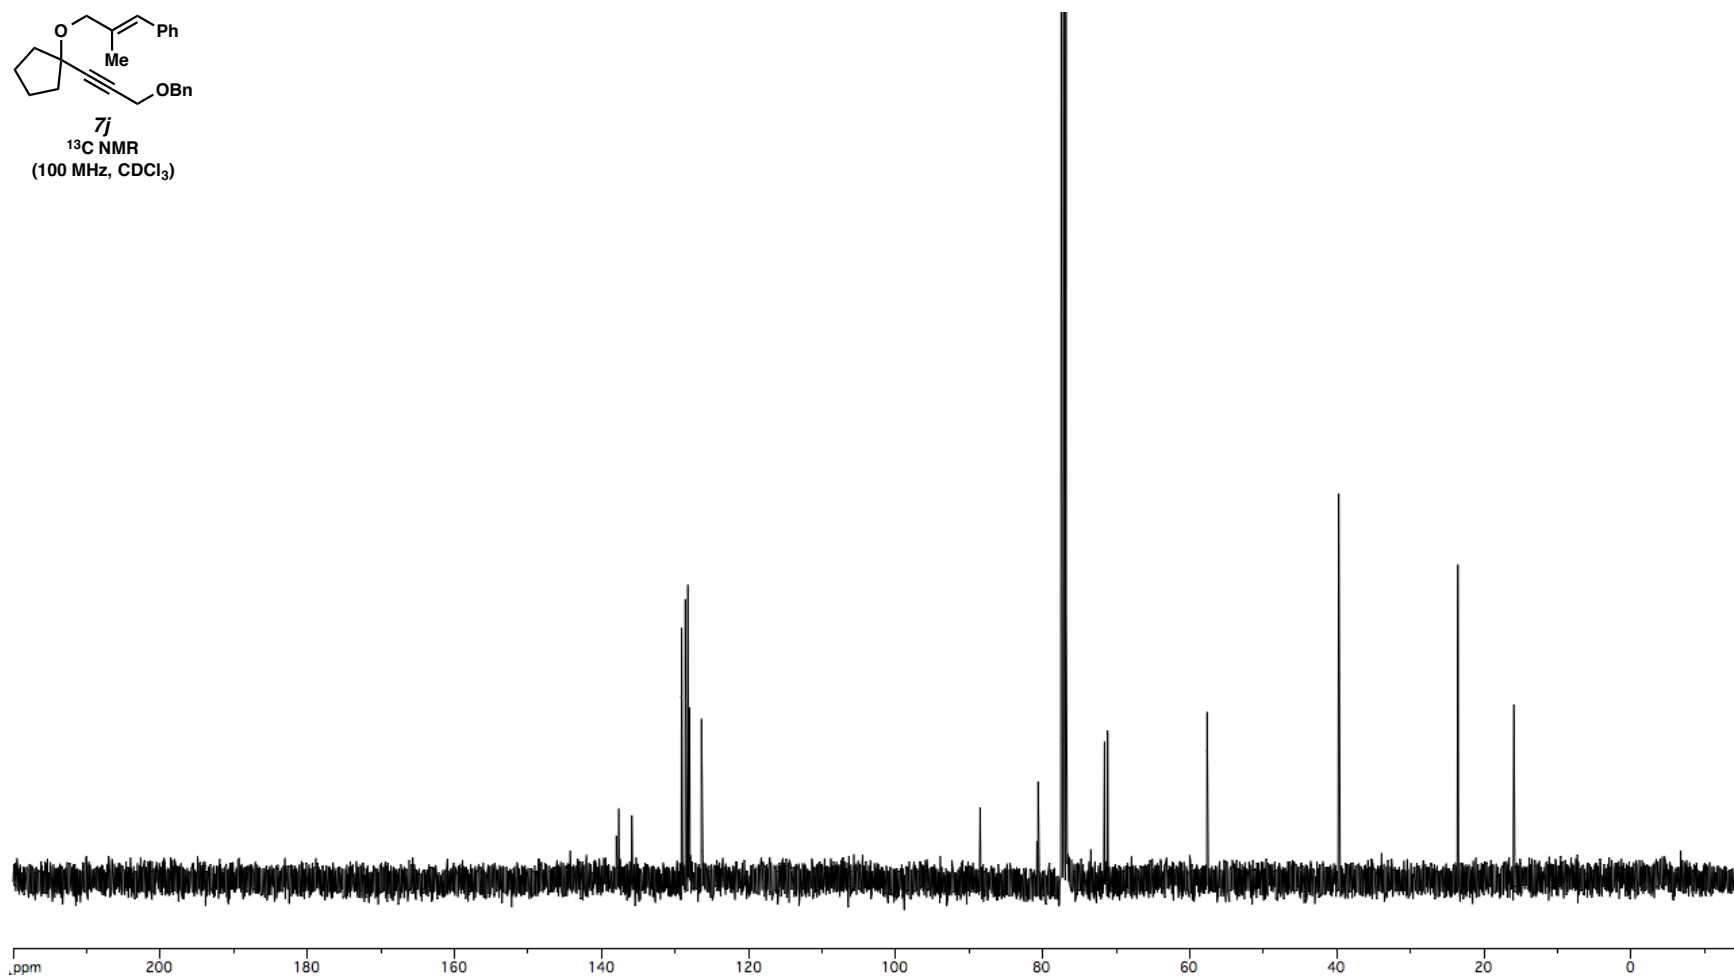

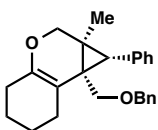

**8j**  
<sup>1</sup>H NMR  
(400 MHz, C<sub>6</sub>D<sub>6</sub>)

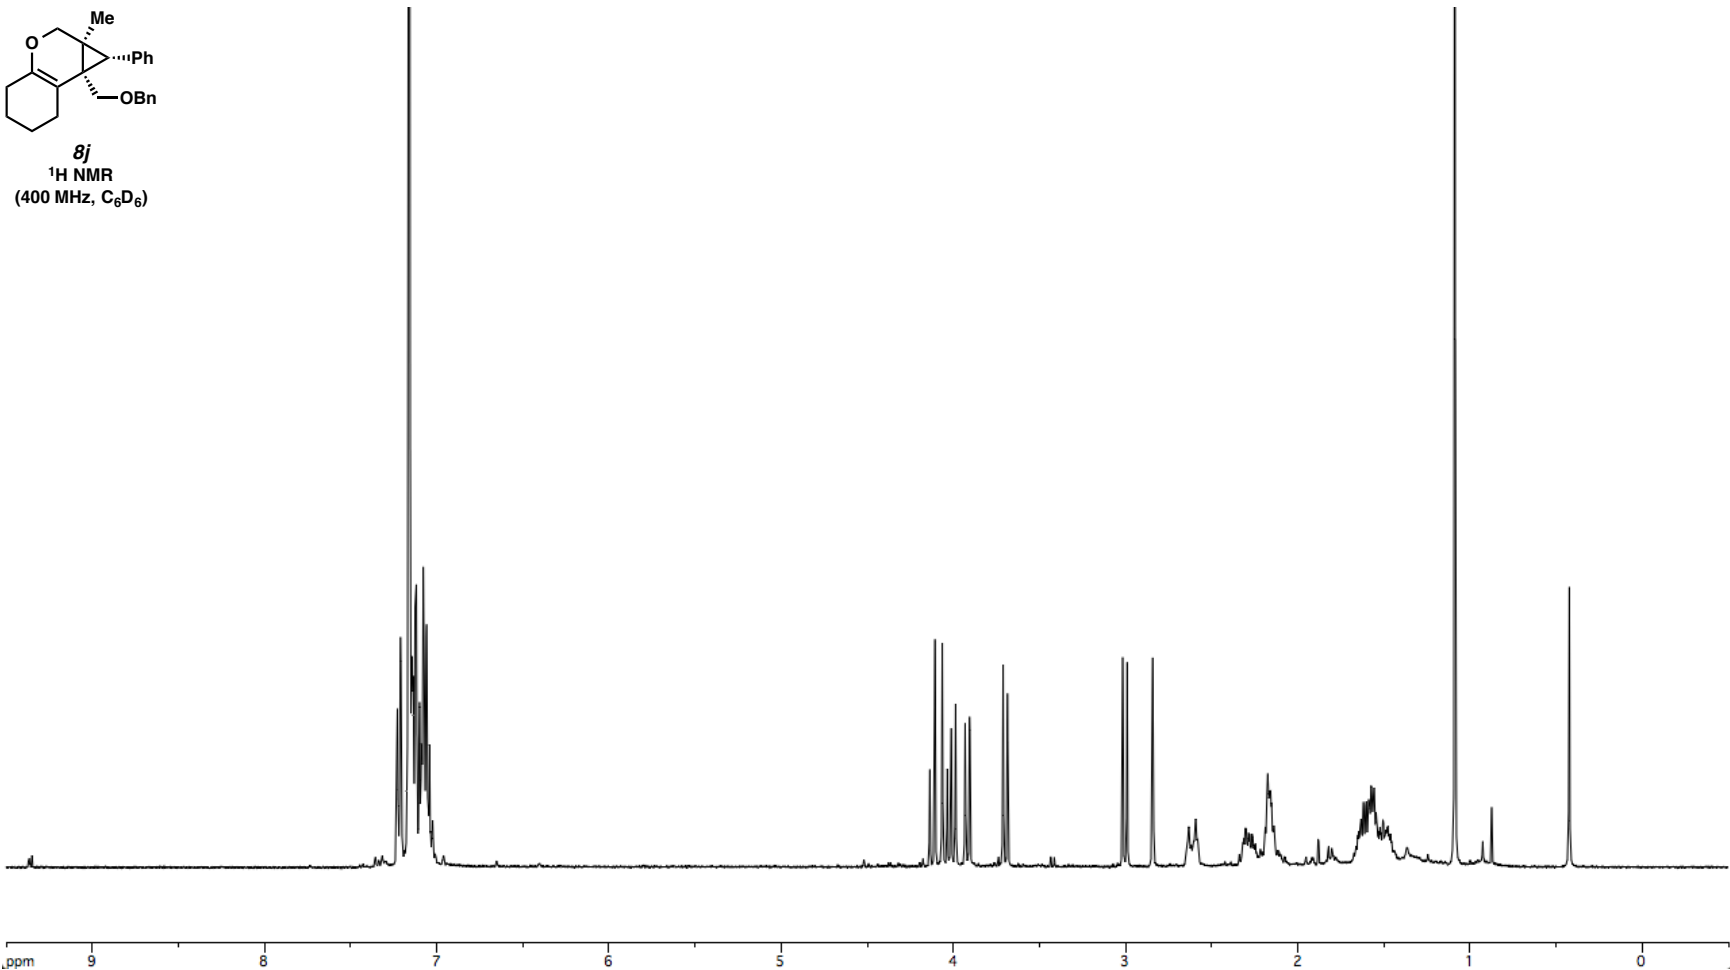



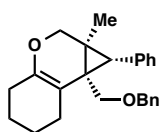

**8j**  
<sup>13</sup>C NMR  
(100 MHz, C<sub>6</sub>D<sub>6</sub>)

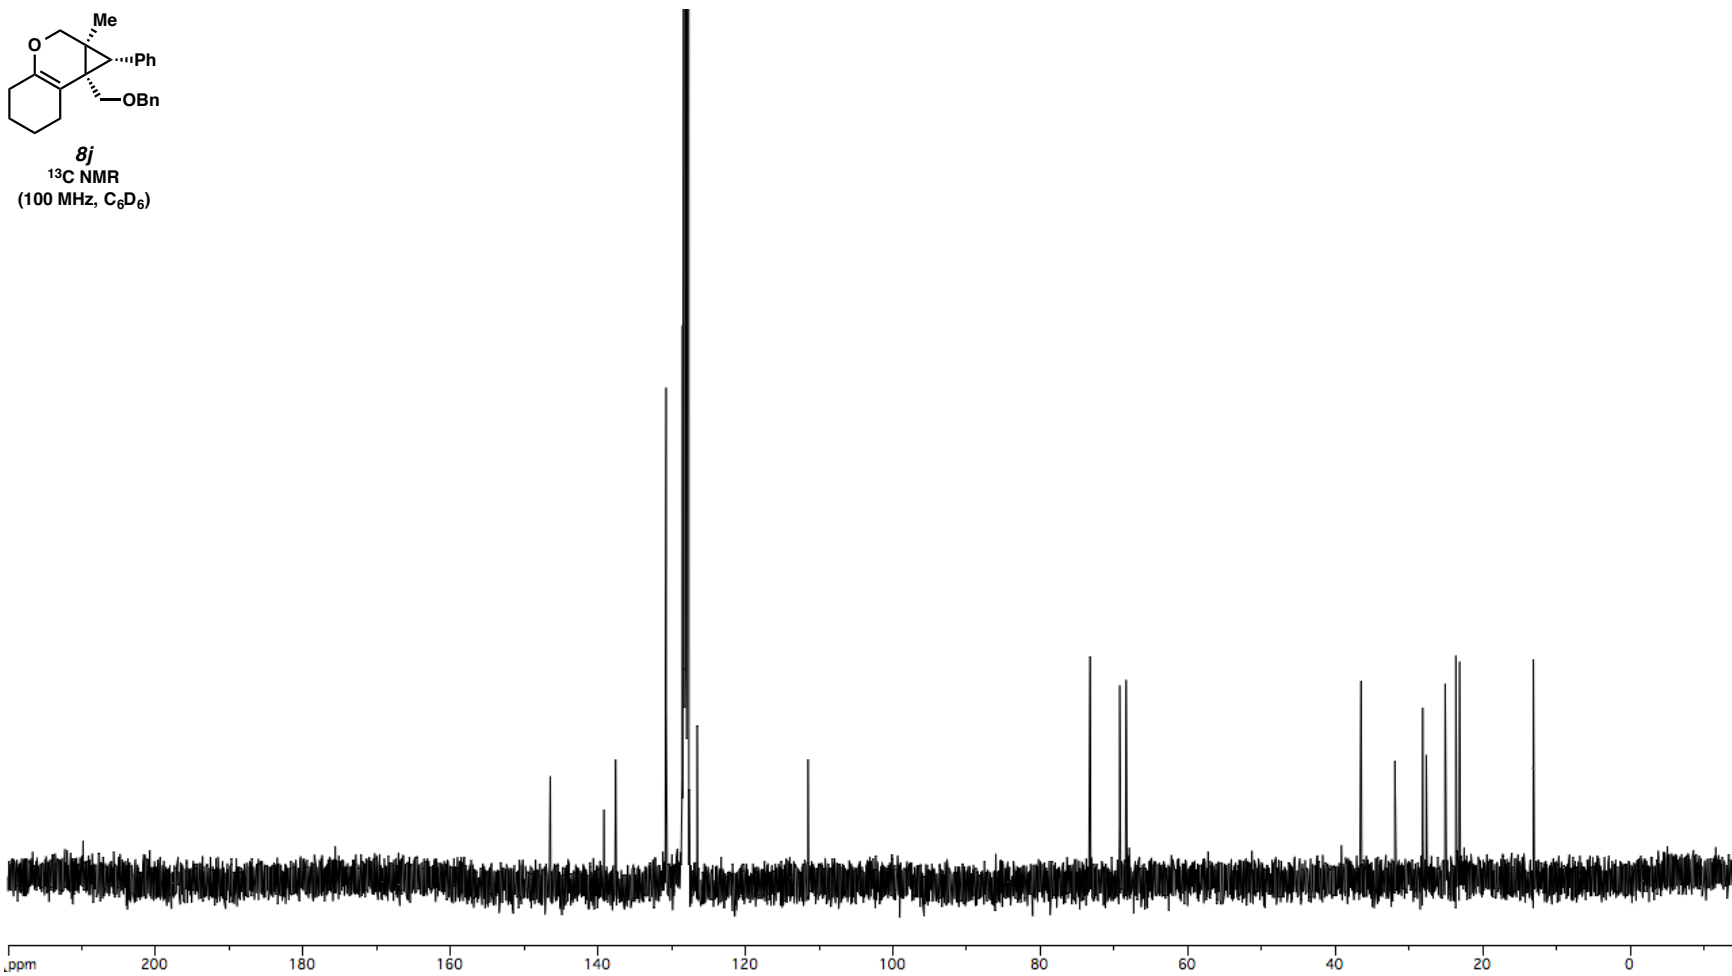

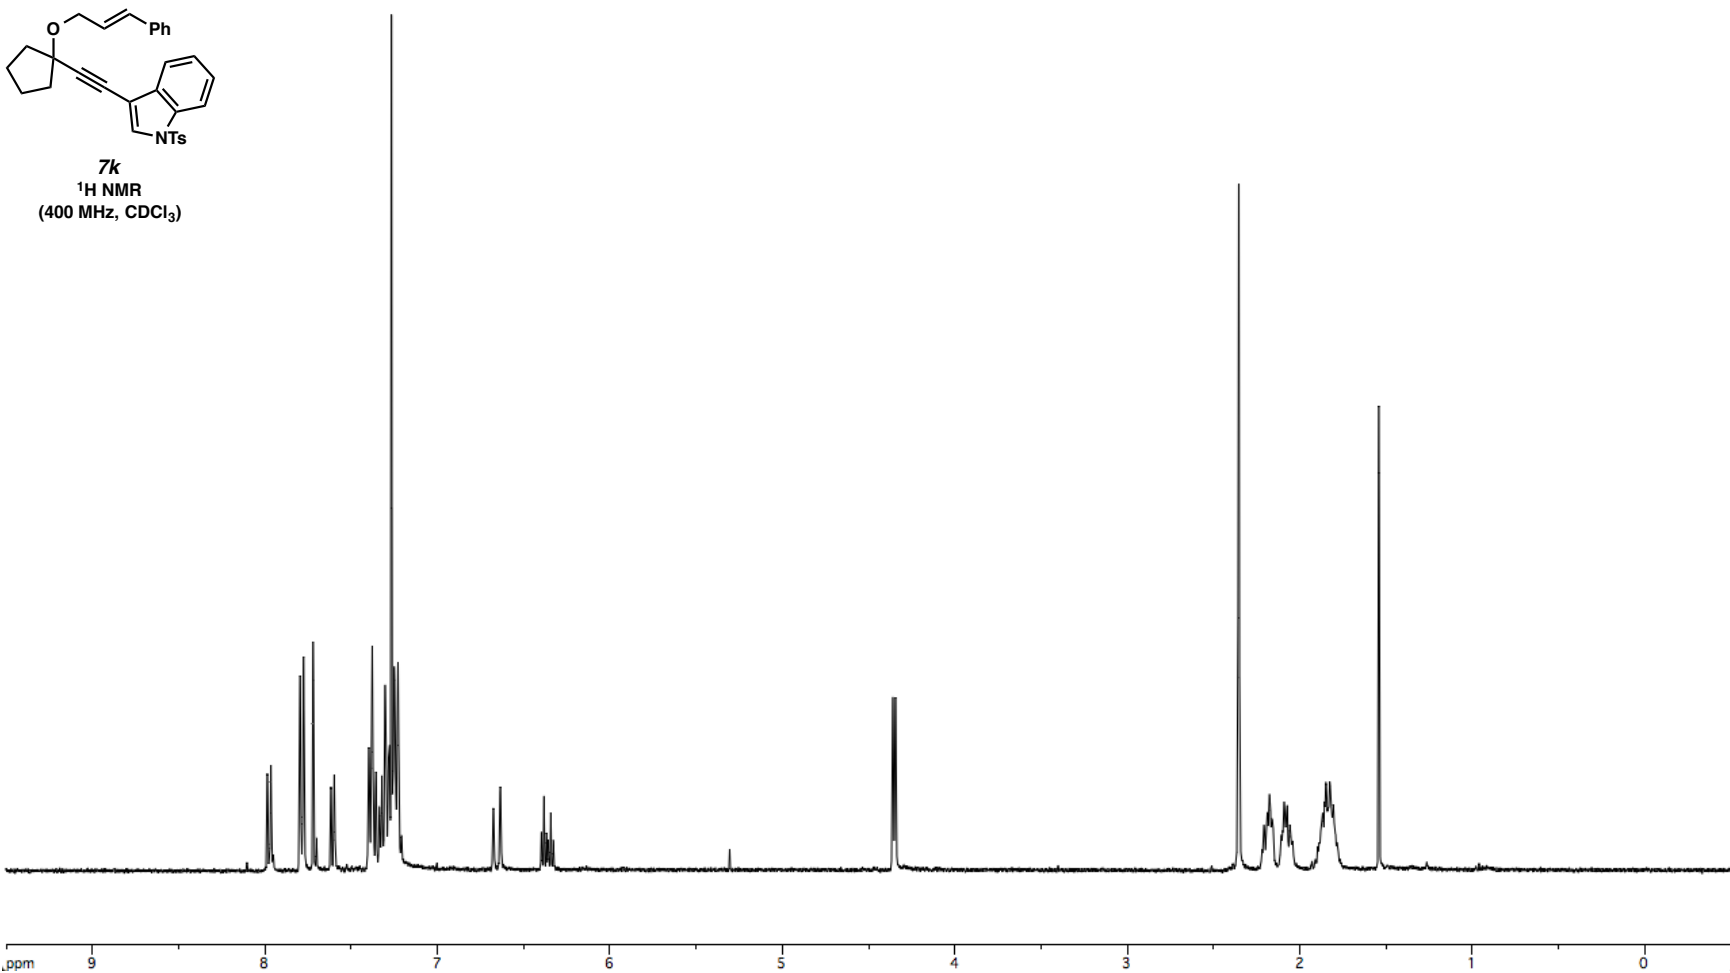

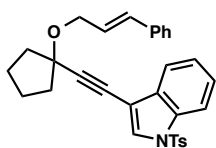

**7k**  
<sup>13</sup>C NMR  
(100 MHz, CDCl<sub>3</sub>)

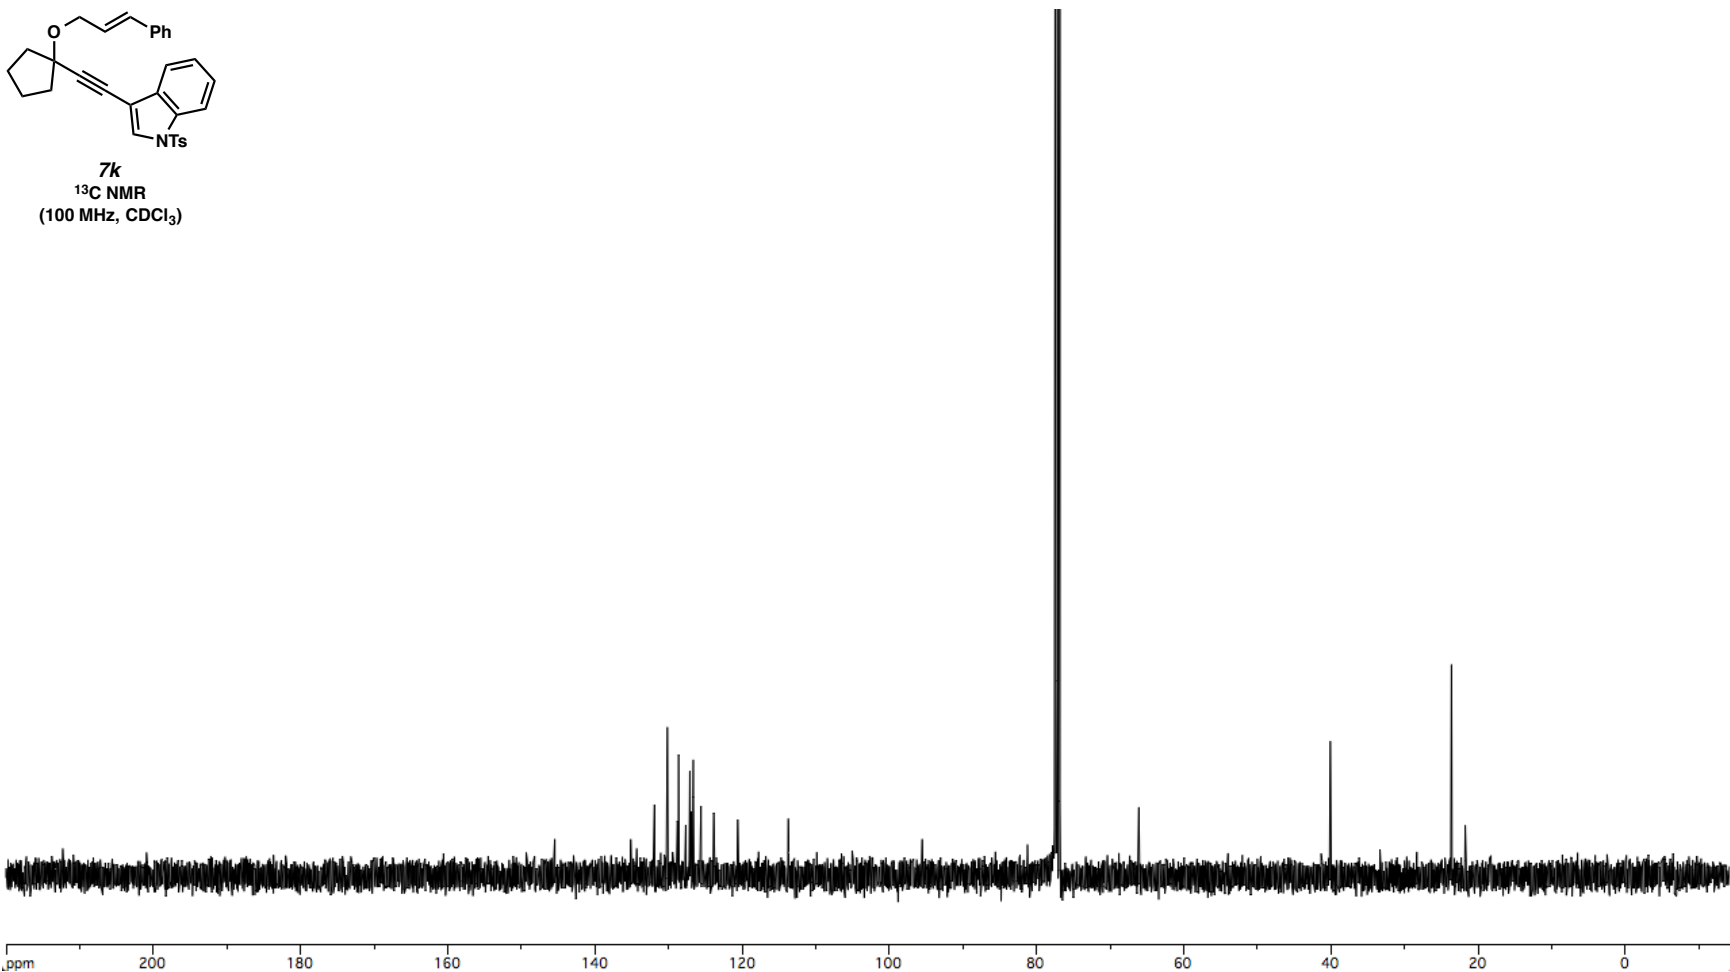

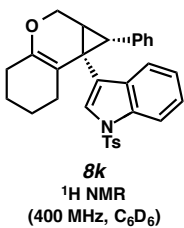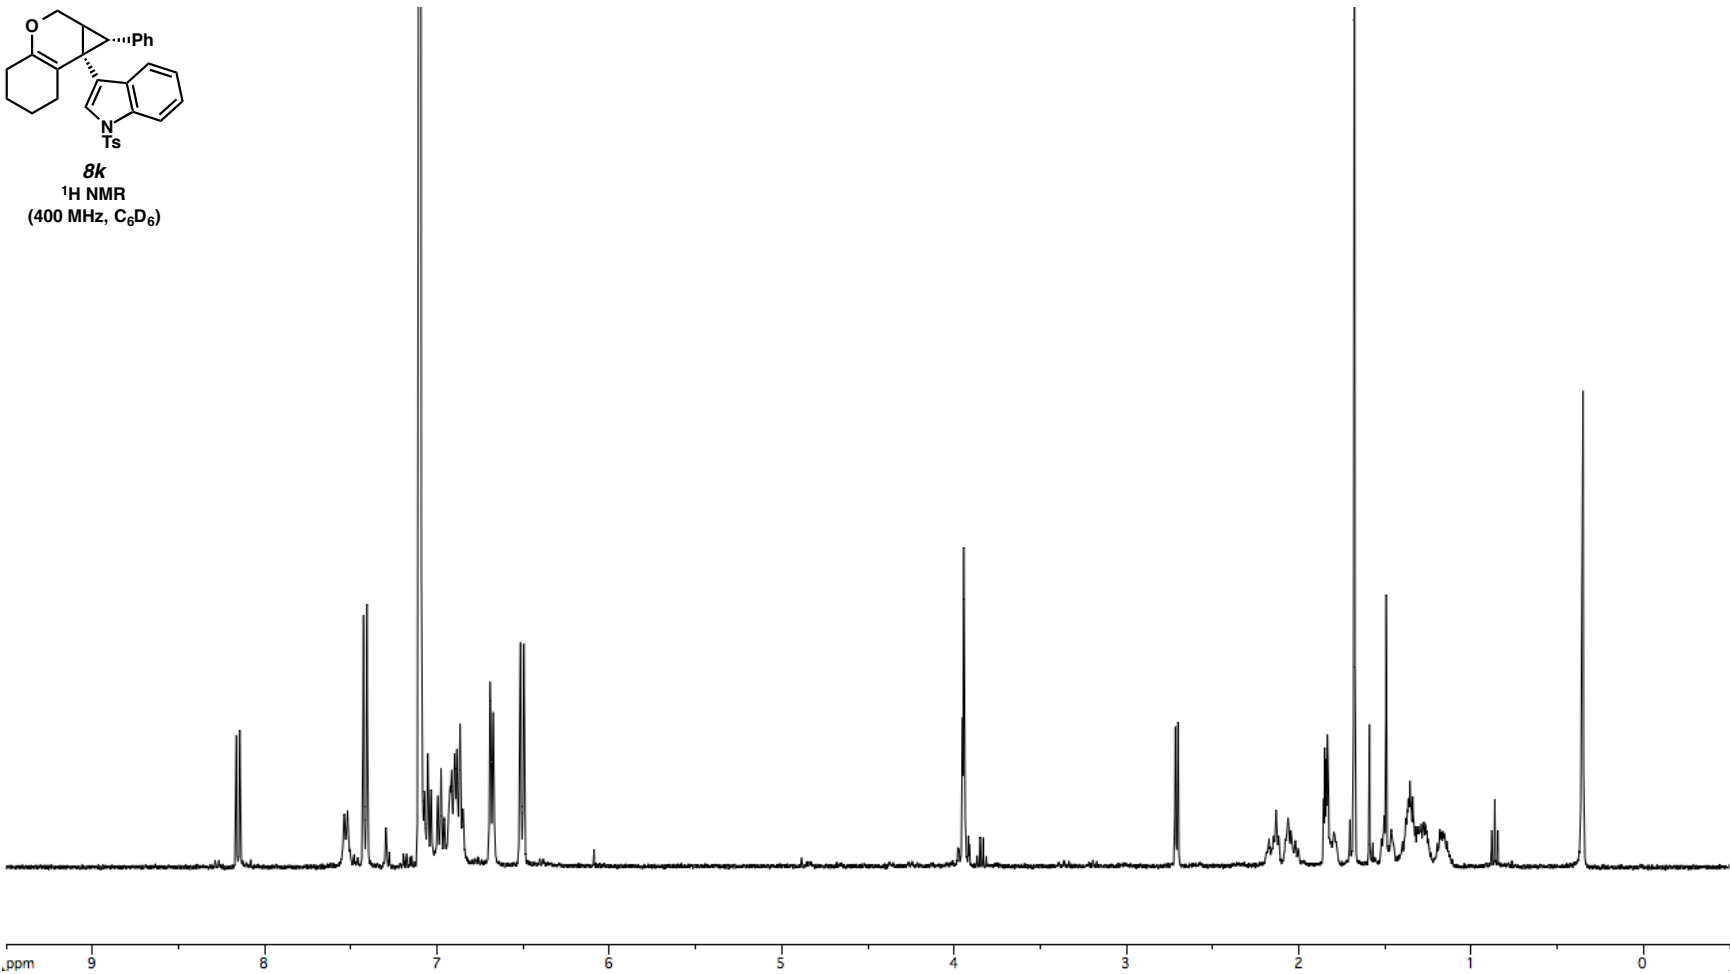

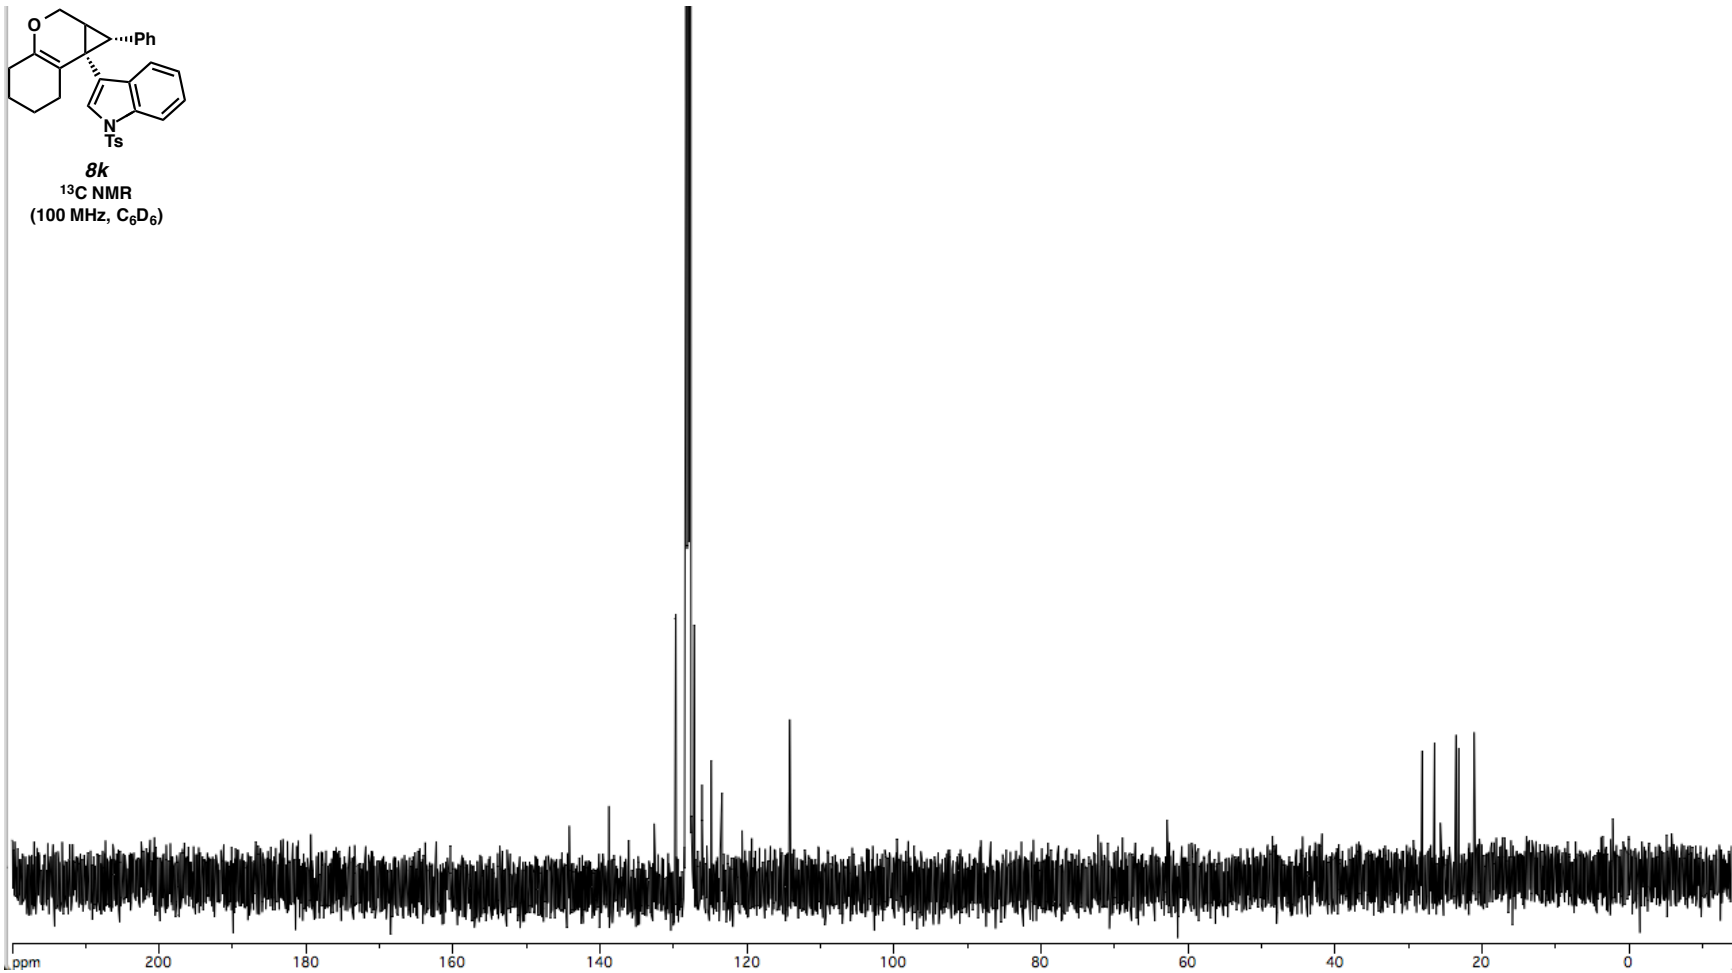

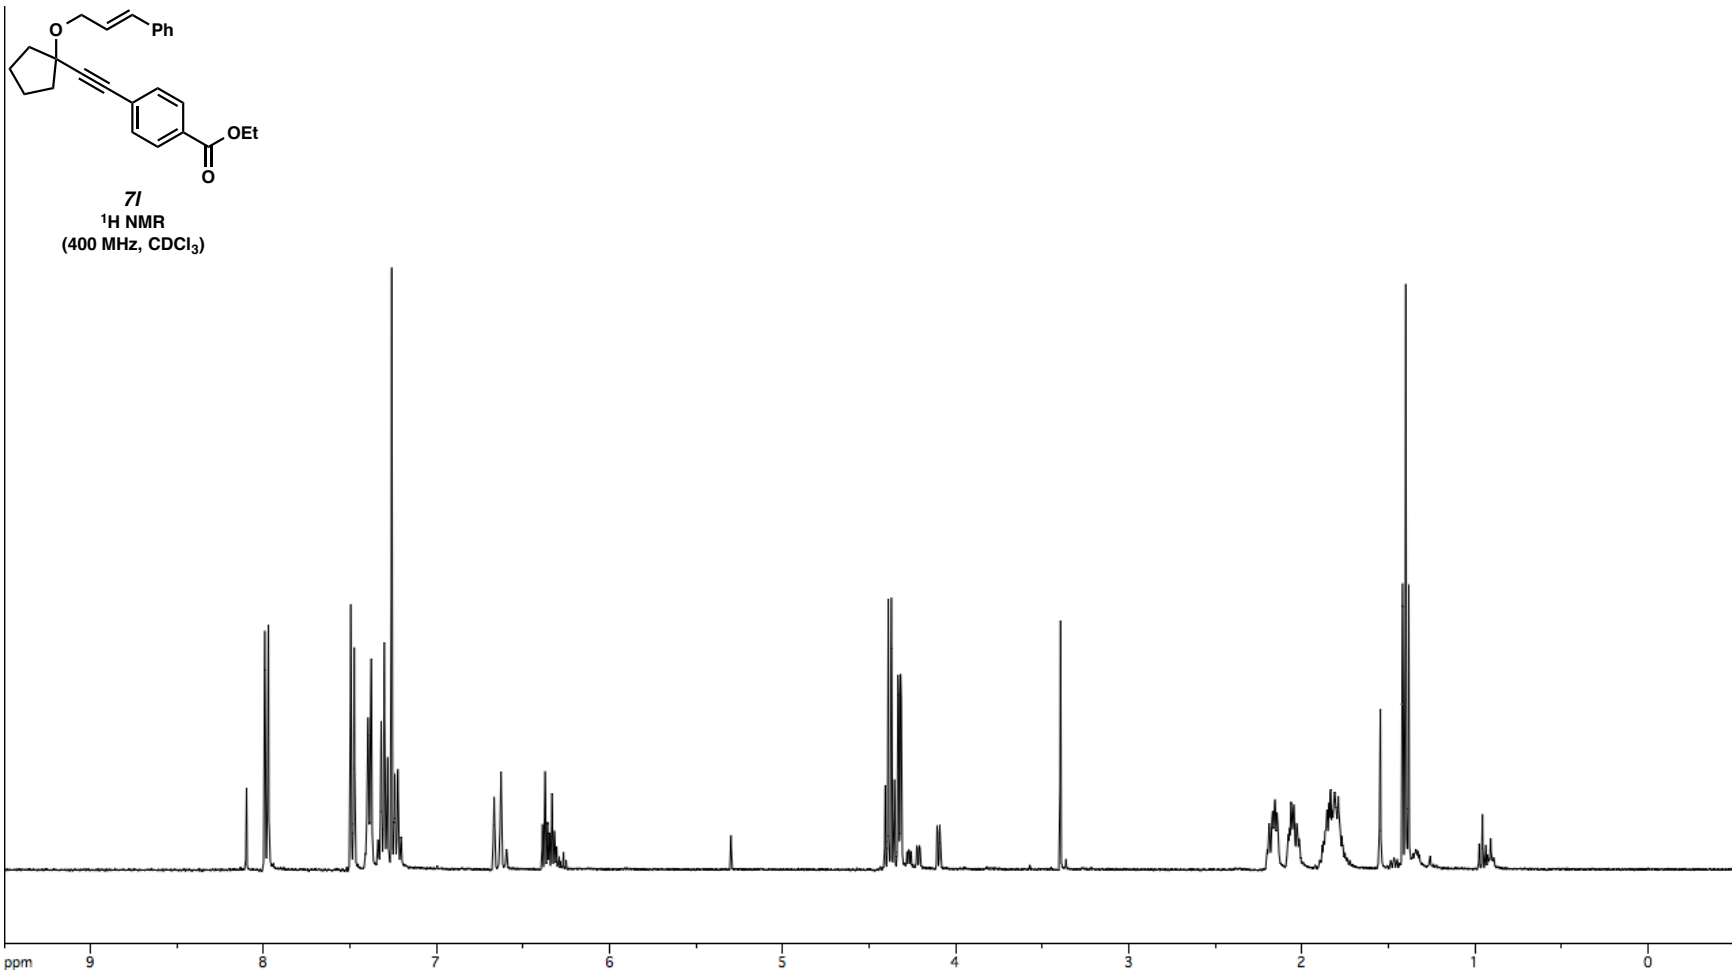

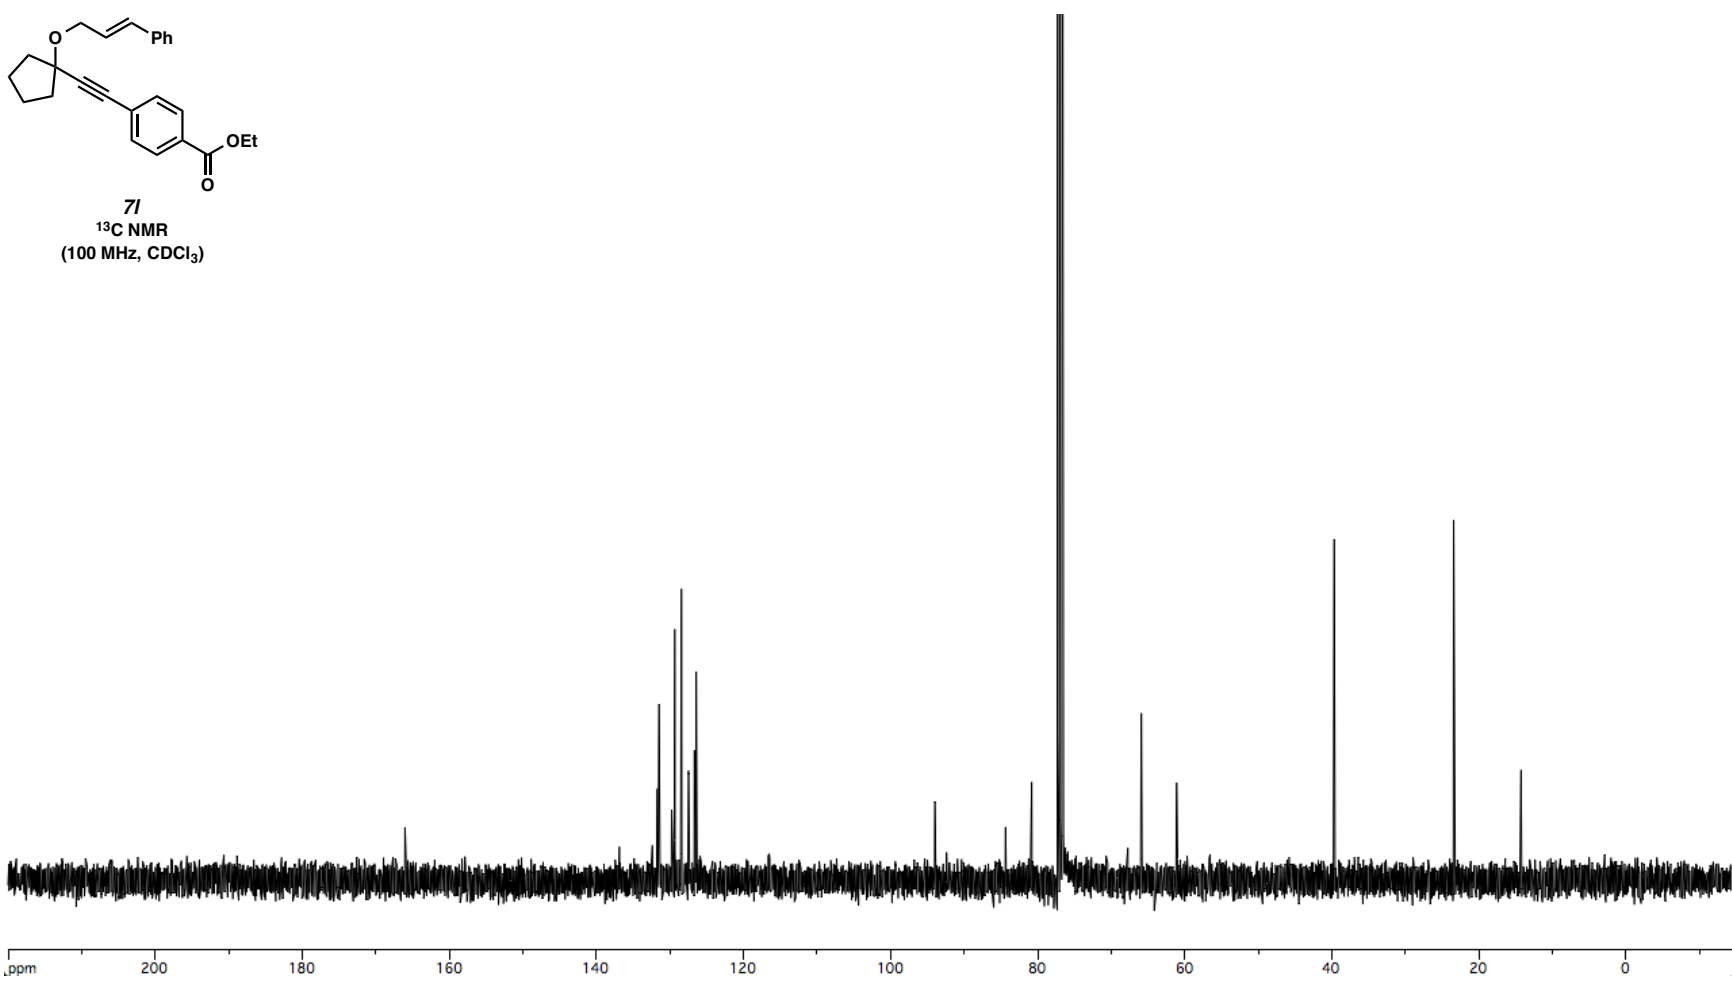

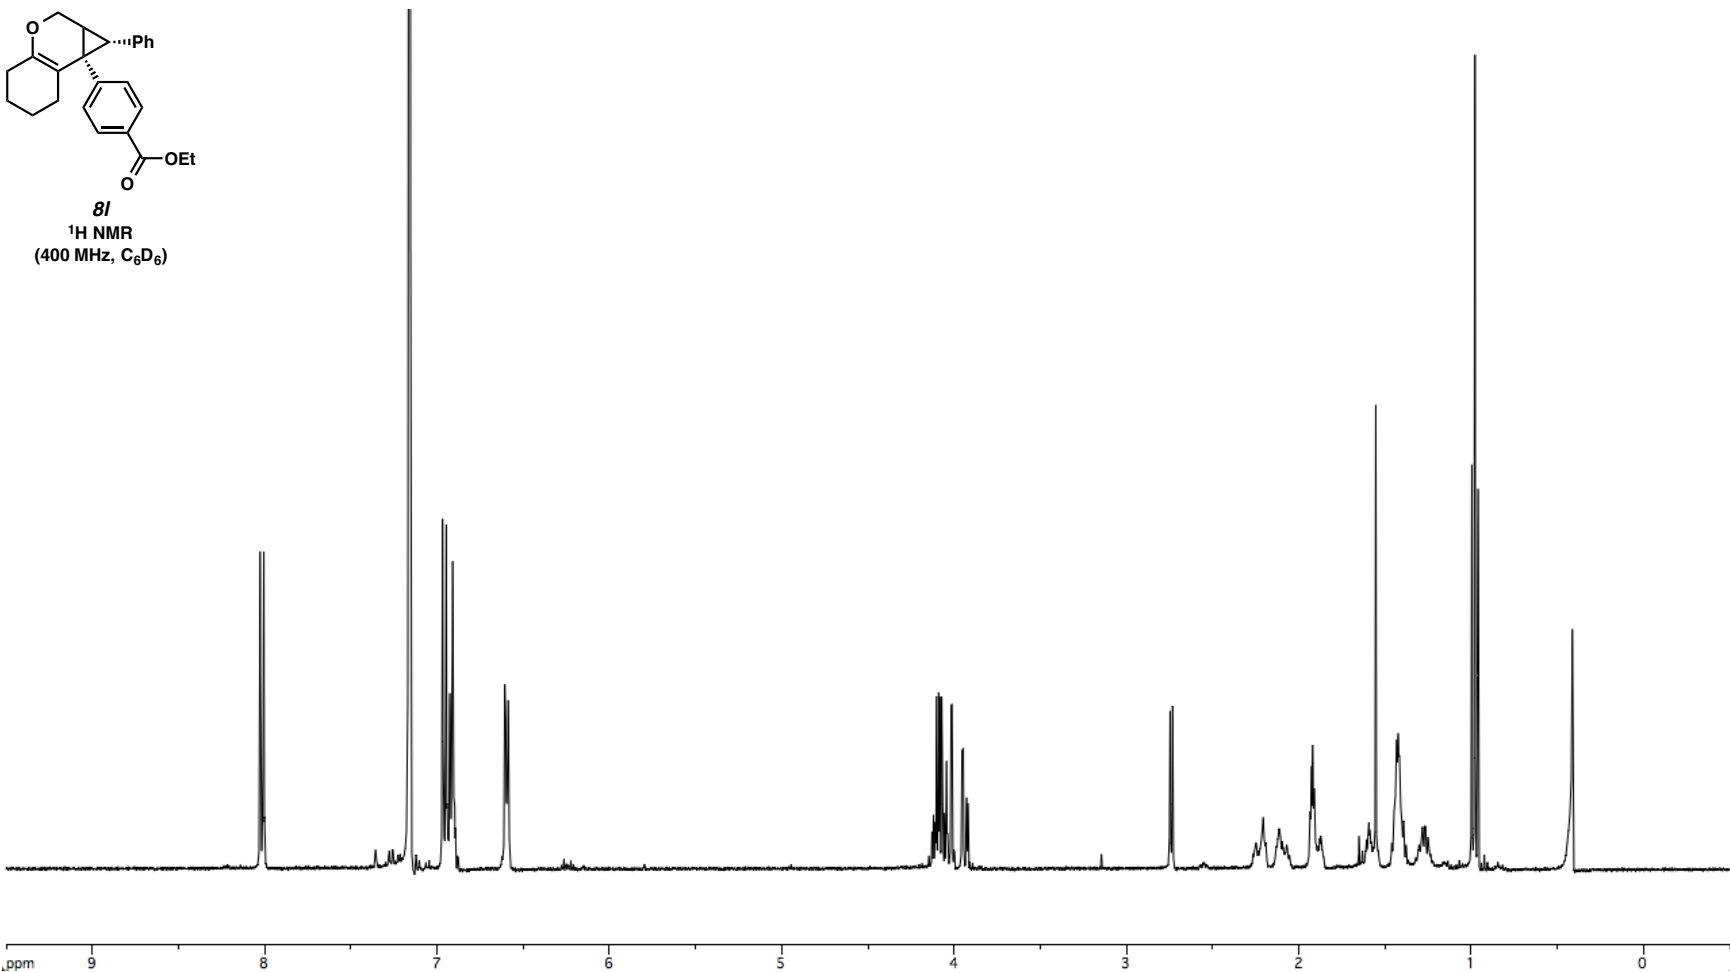



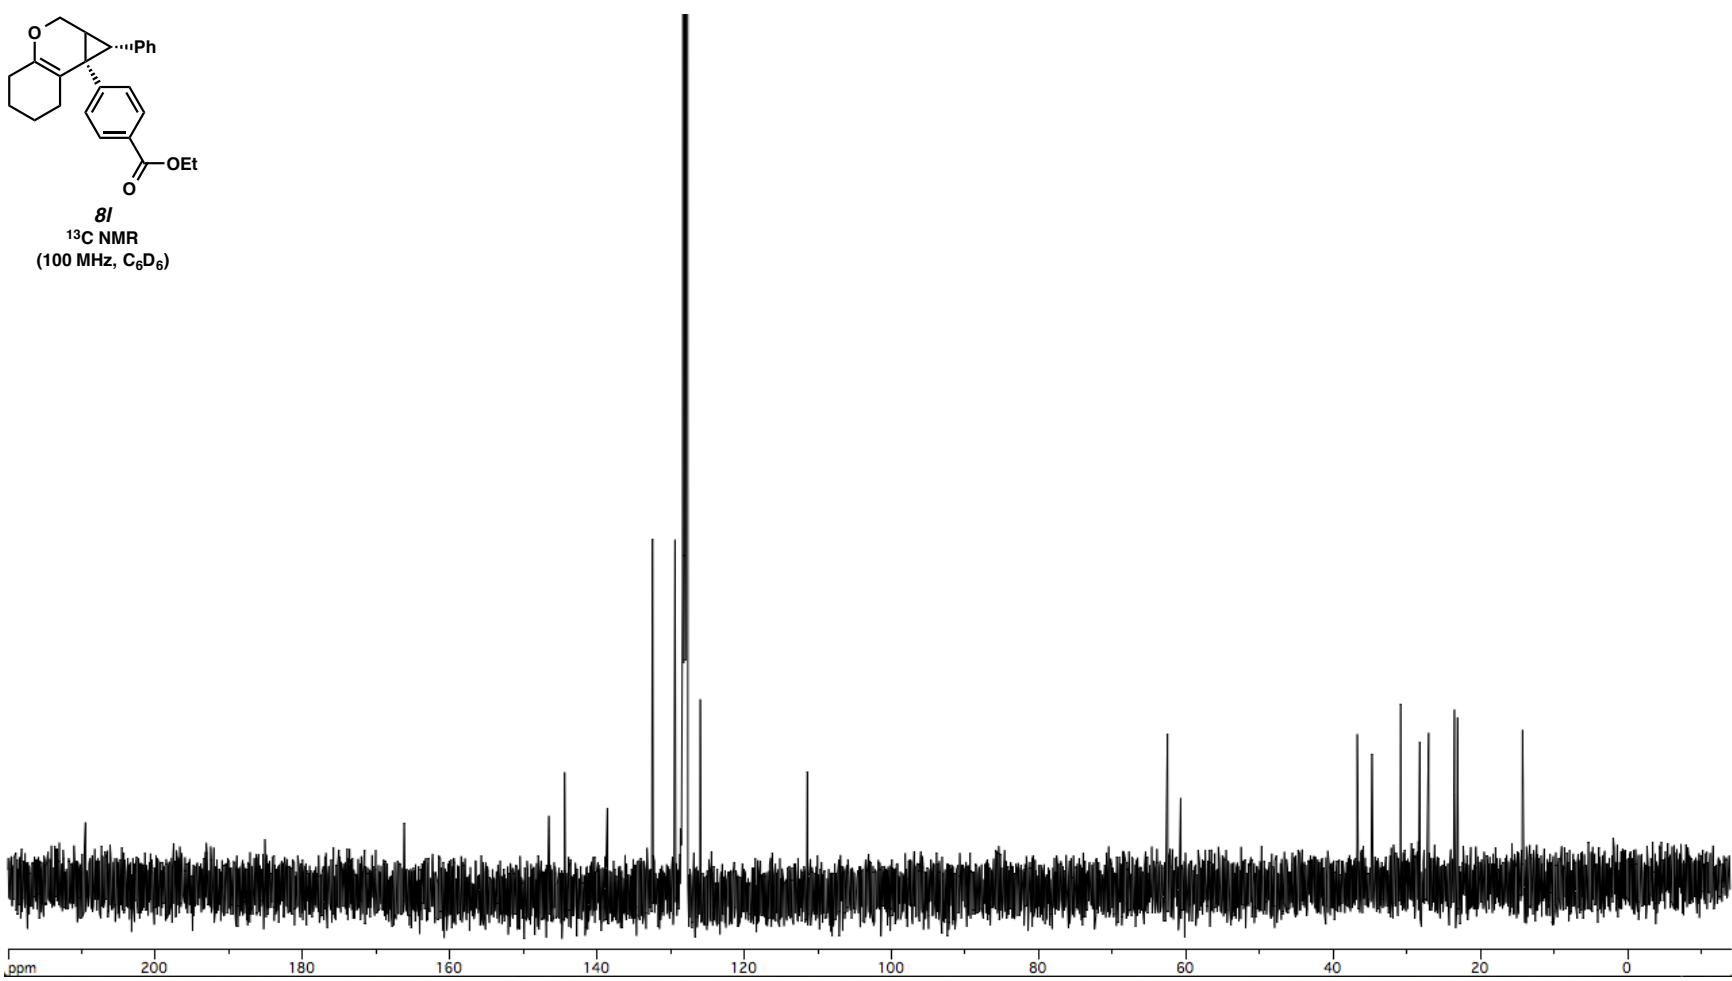

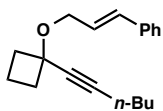

**S1**  
<sup>1</sup>H NMR  
(400 MHz, CDCl<sub>3</sub>)

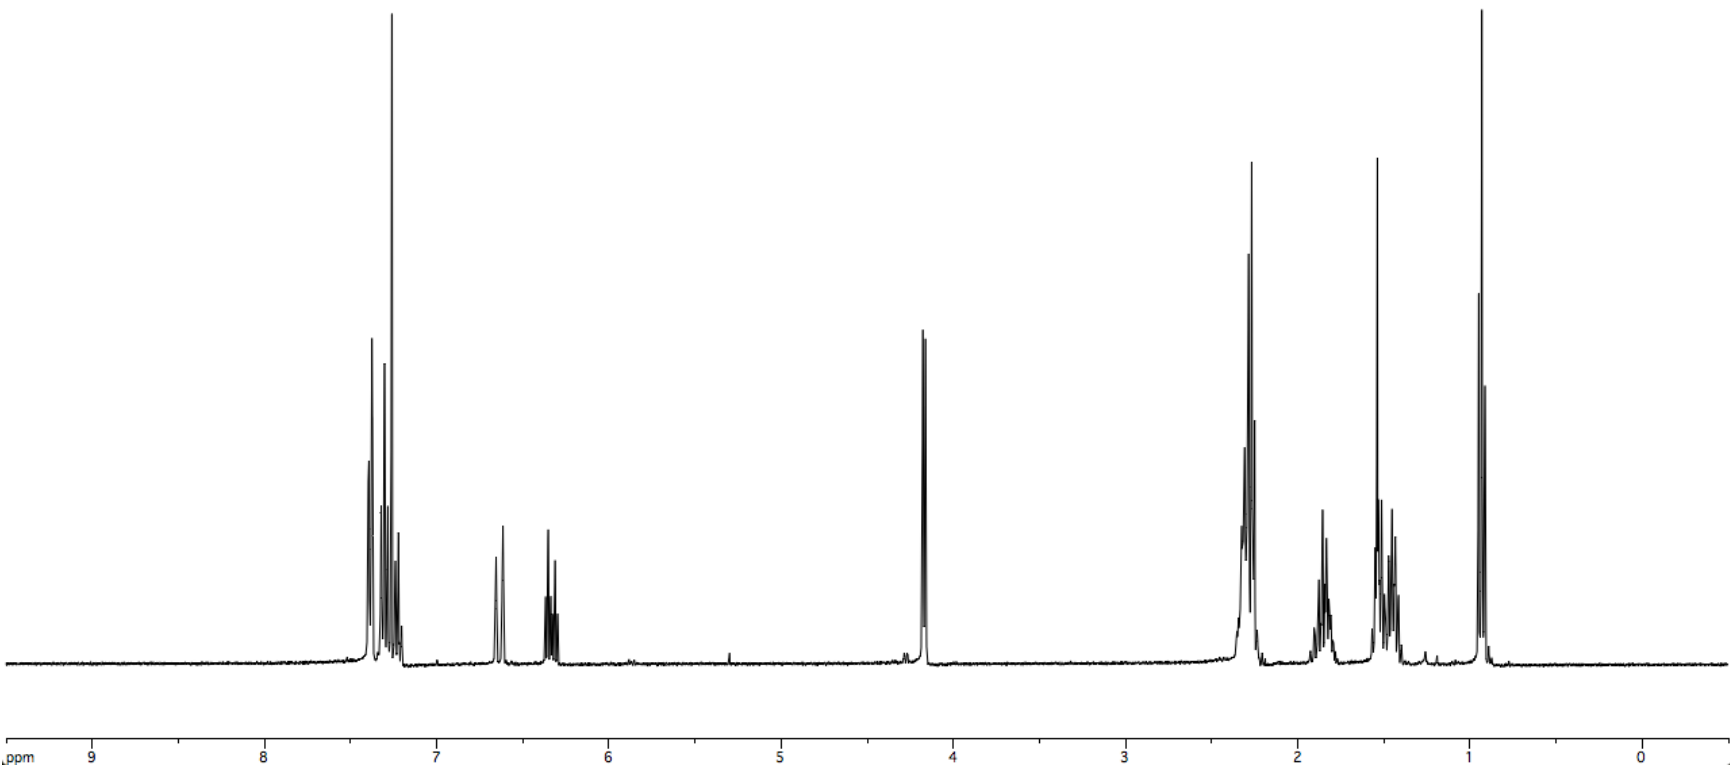

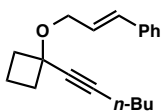

**S1**  
<sup>13</sup>C NMR  
(100 MHz, CDCl<sub>3</sub>)

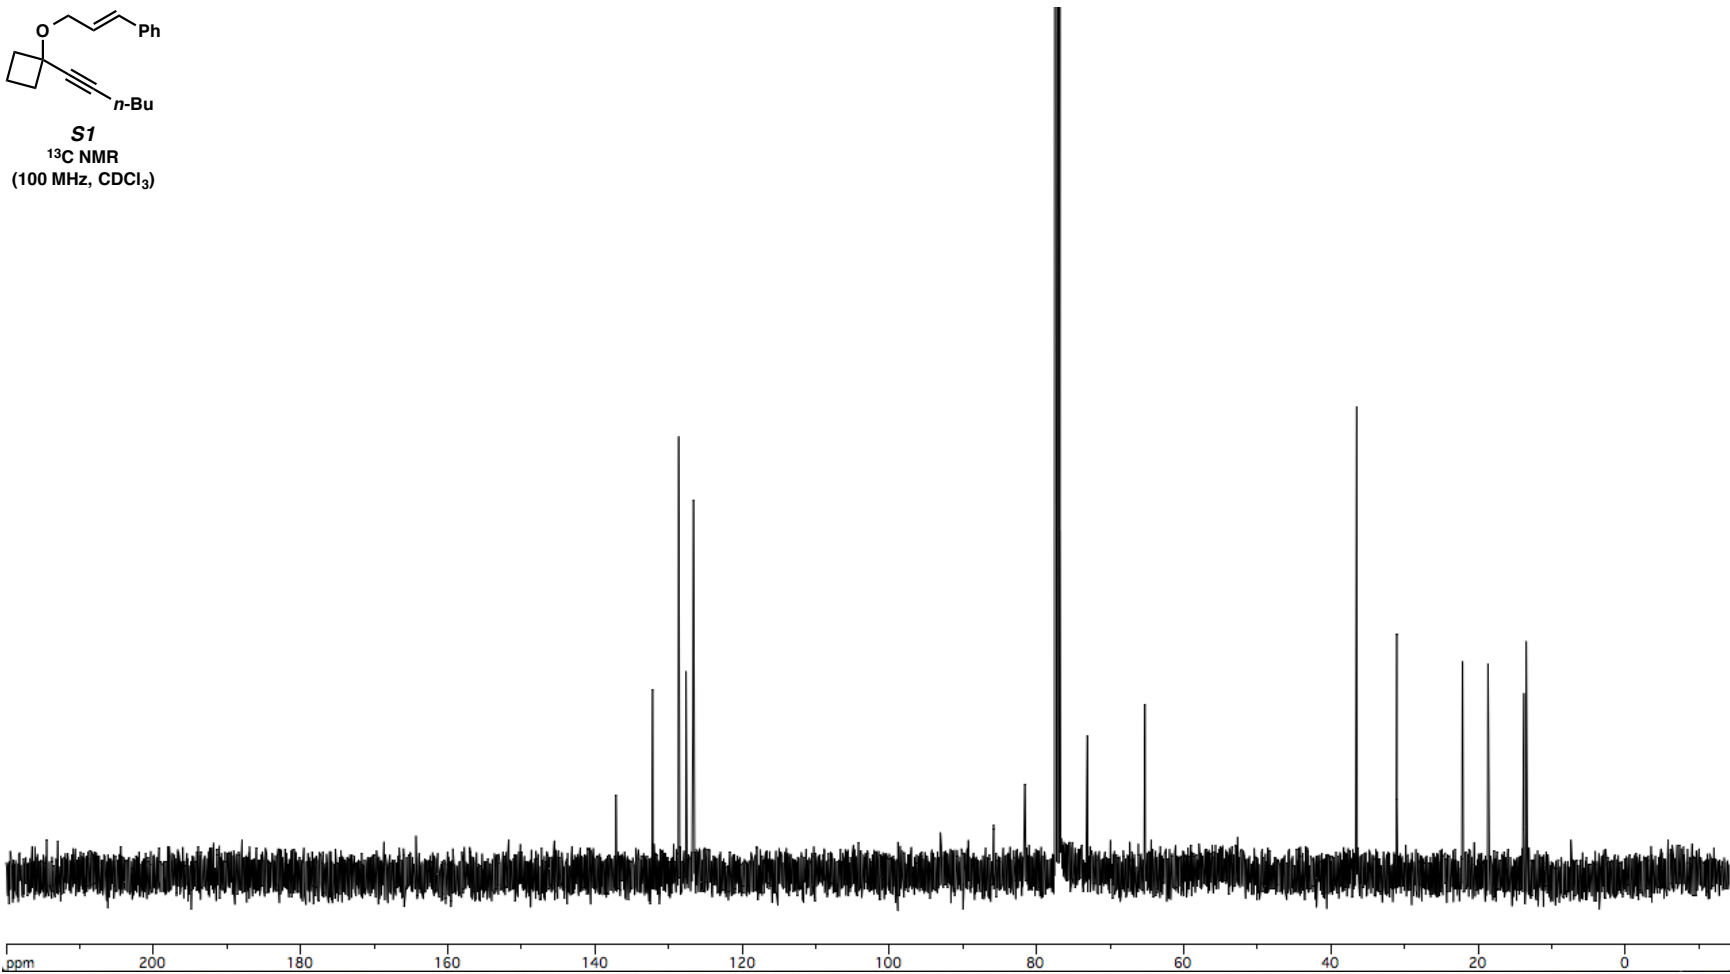

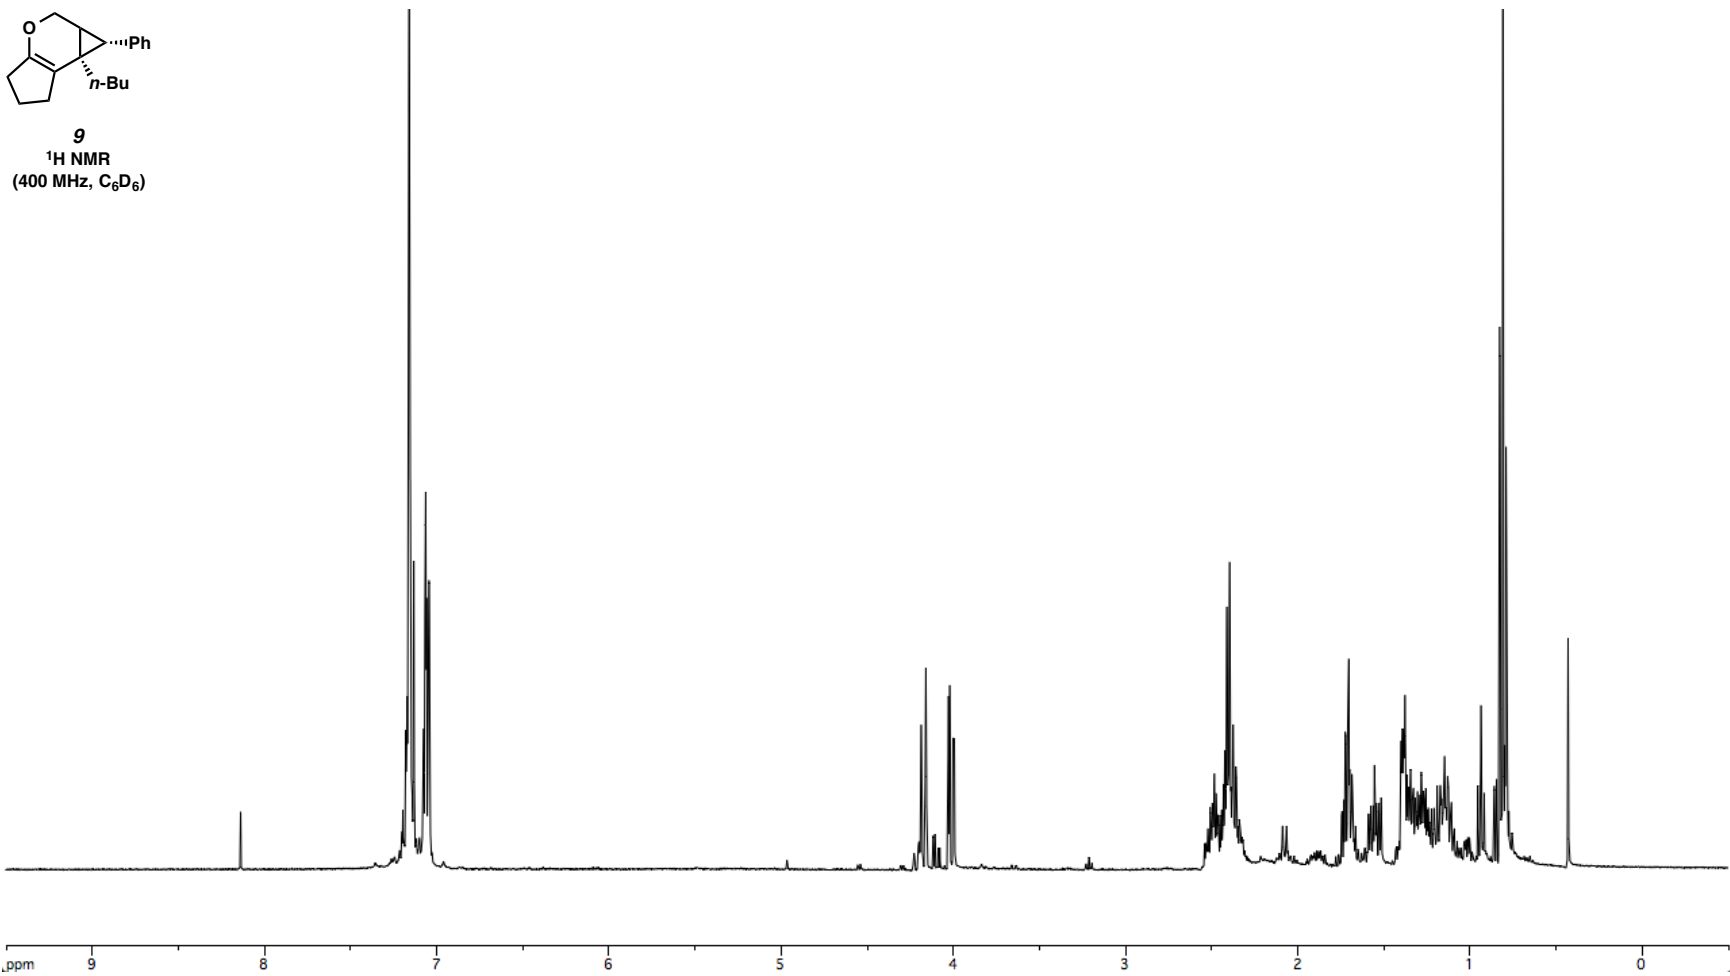

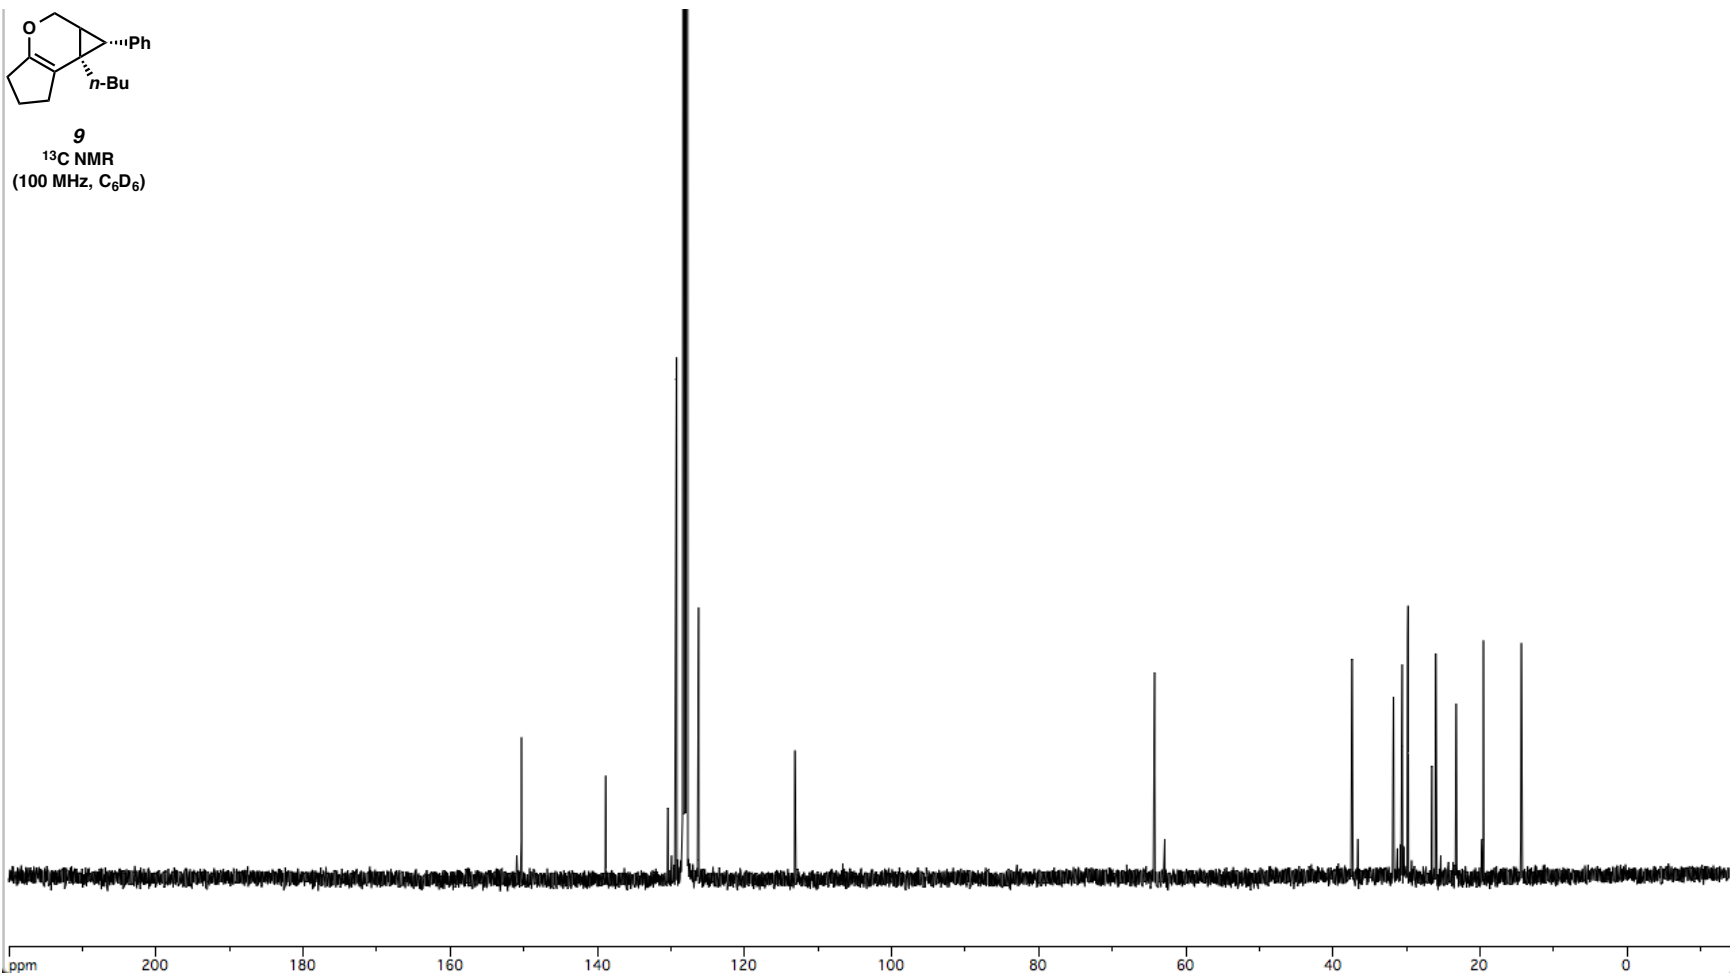

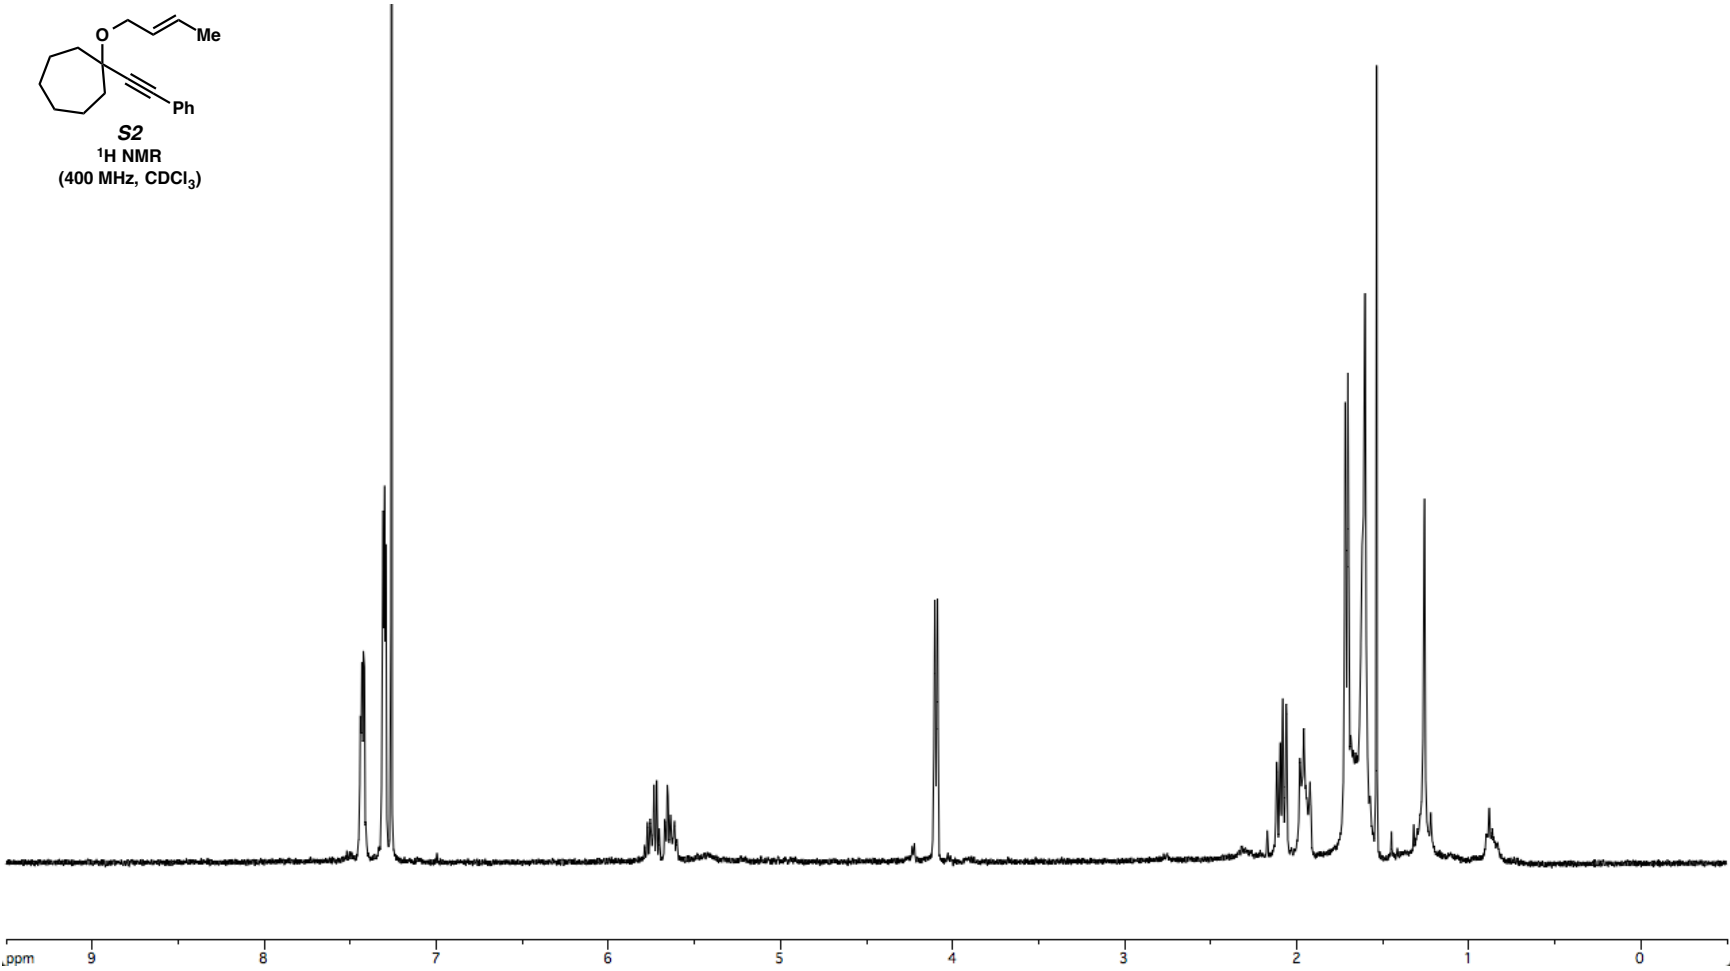

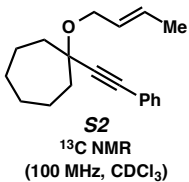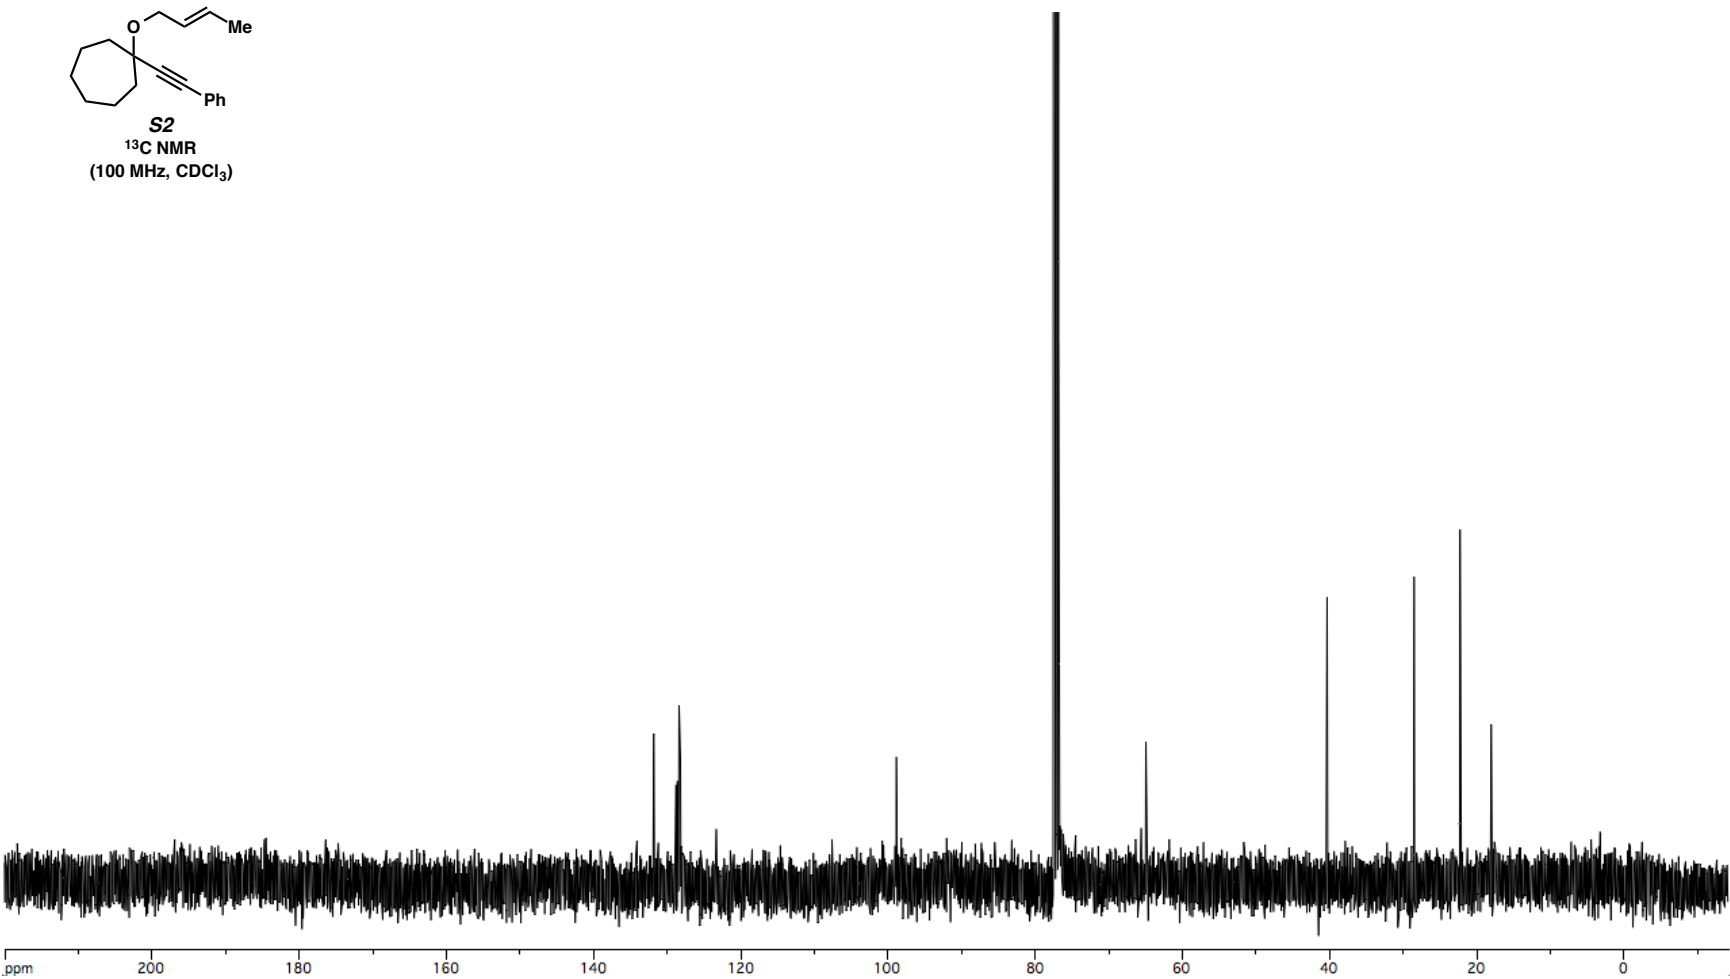

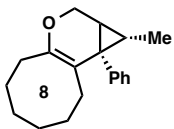

**10**  
<sup>1</sup>H NMR  
(400 MHz, C<sub>6</sub>D<sub>6</sub>)

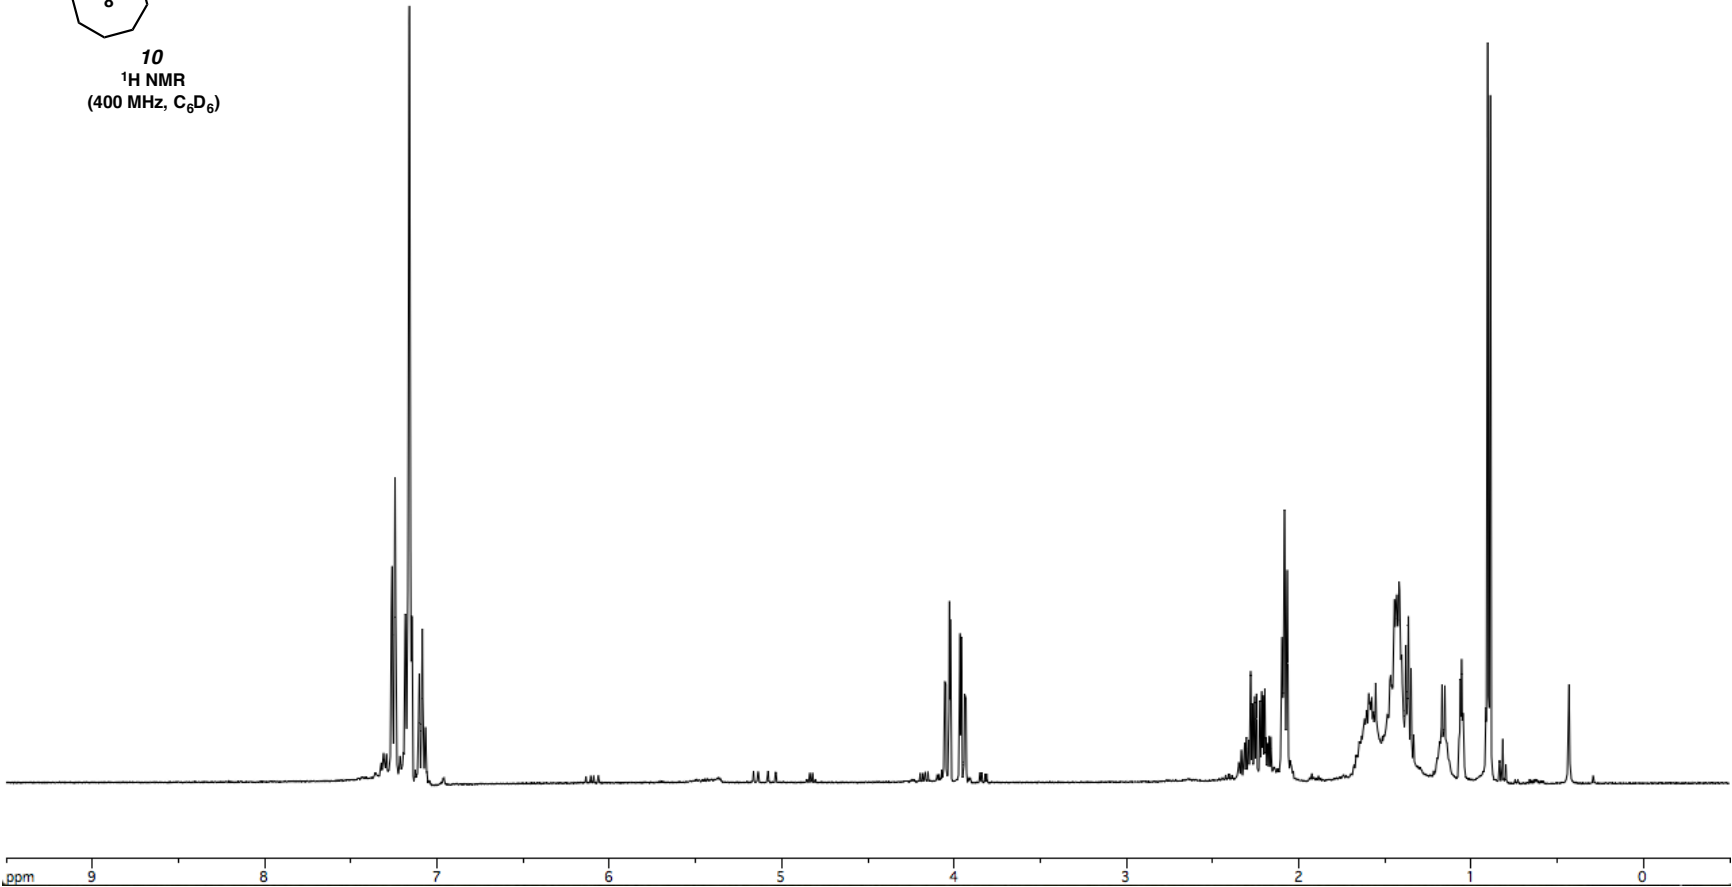



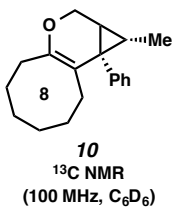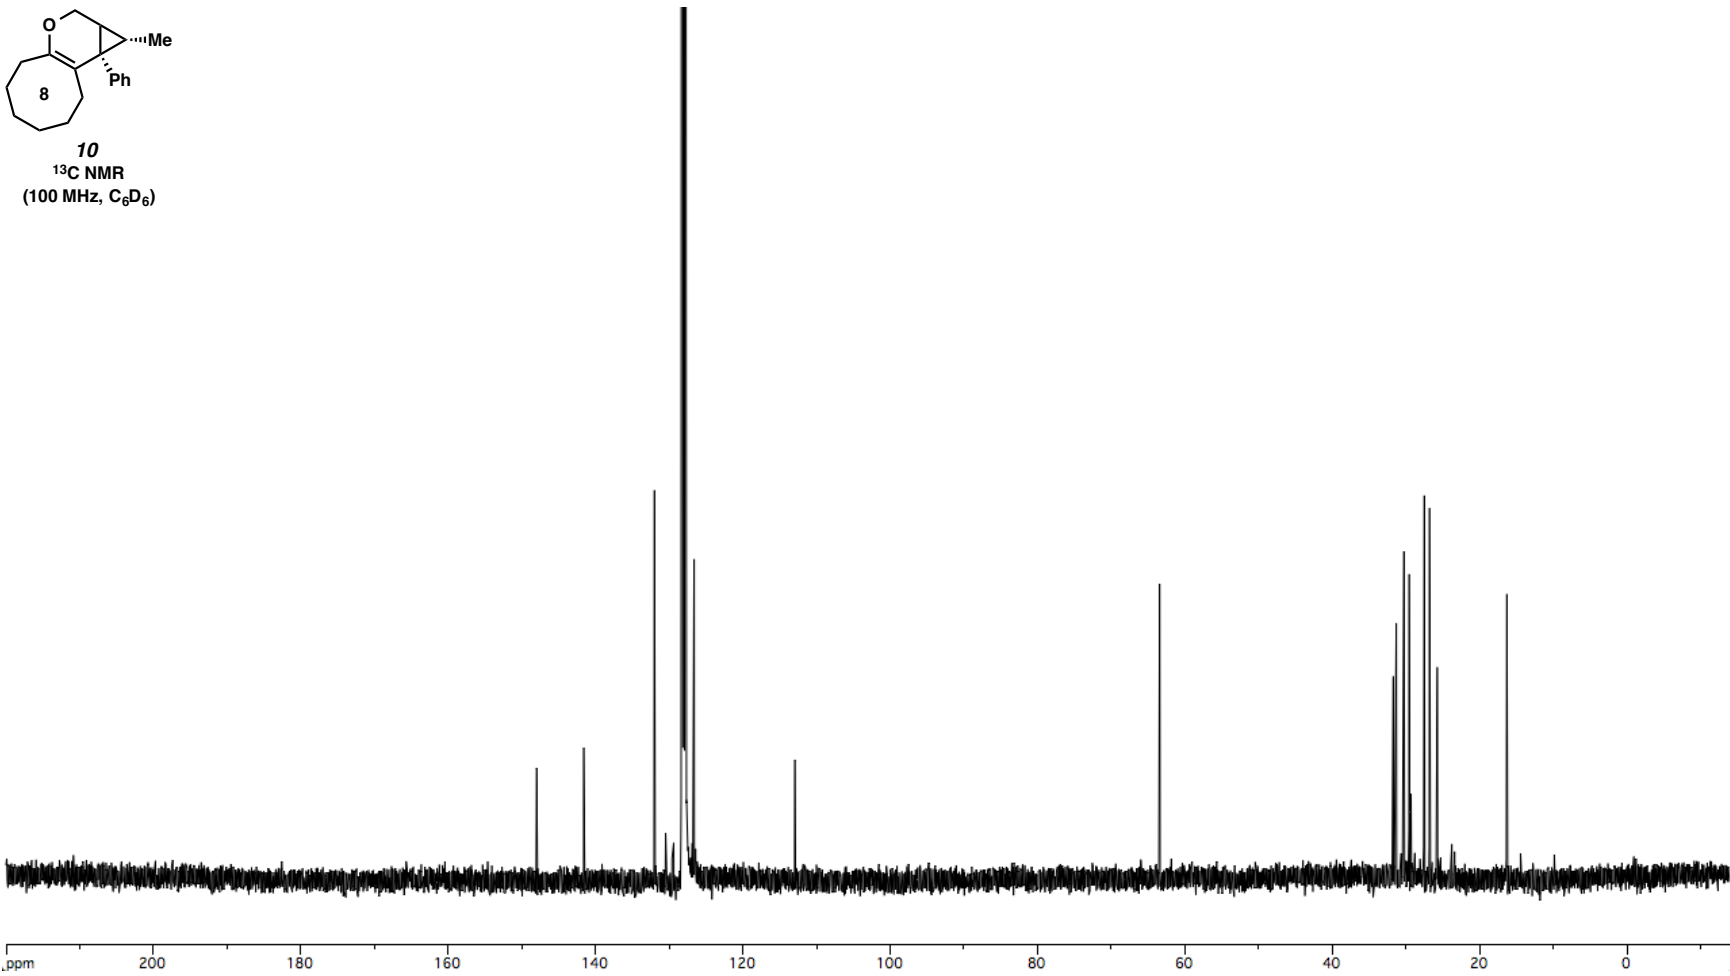

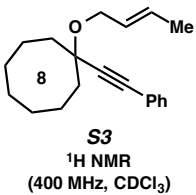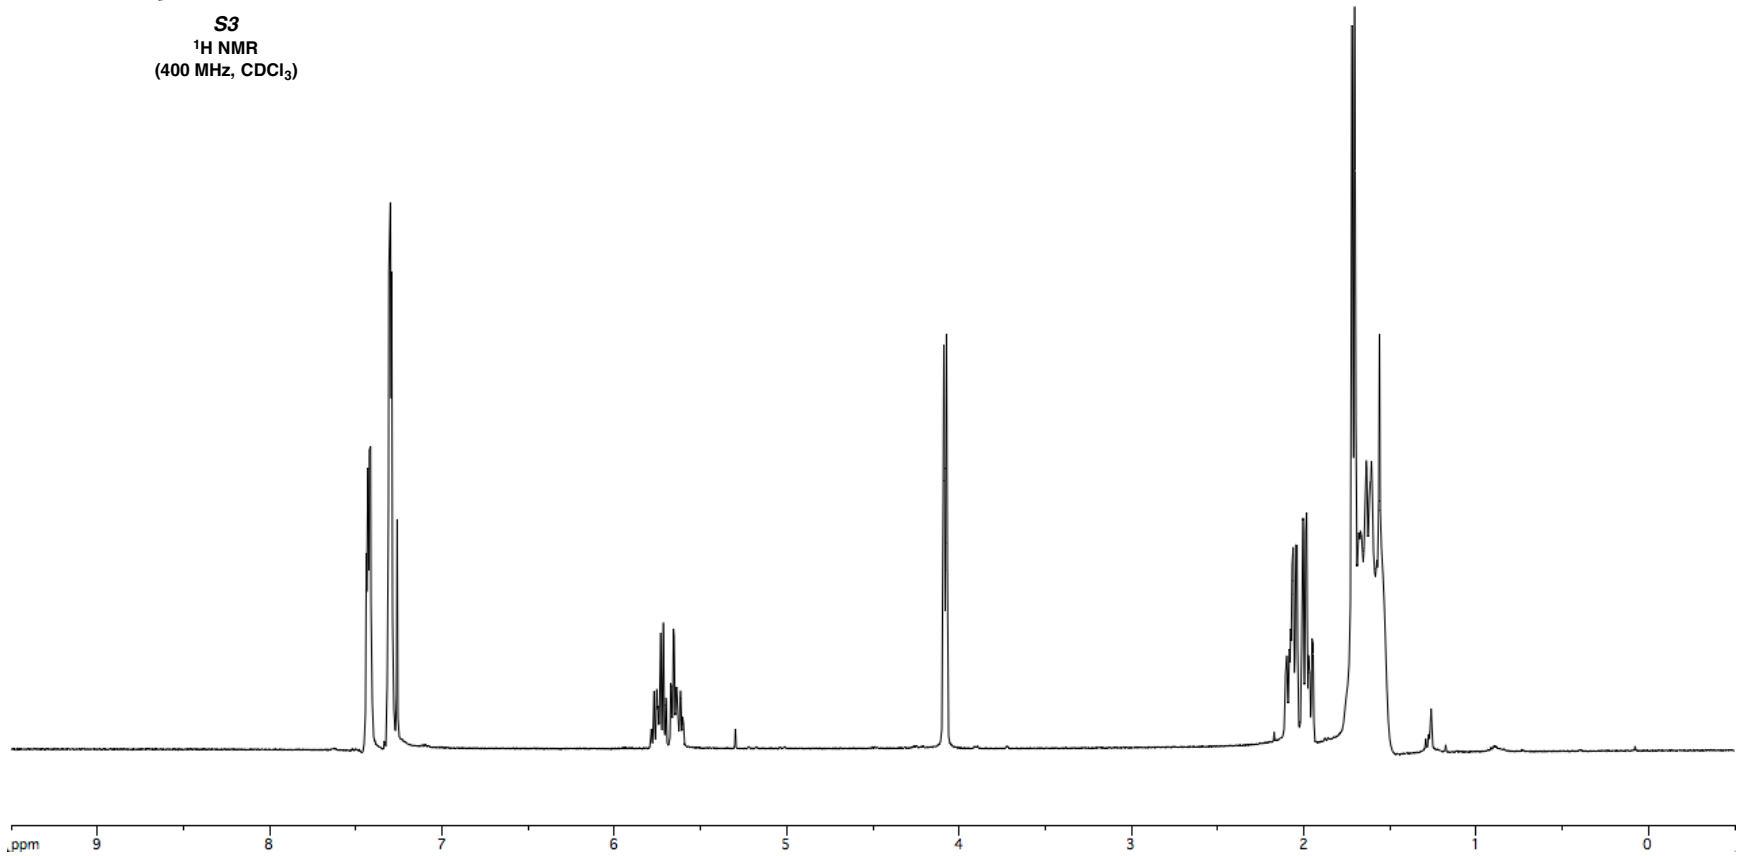

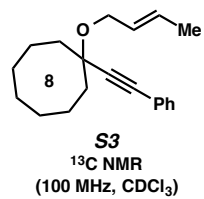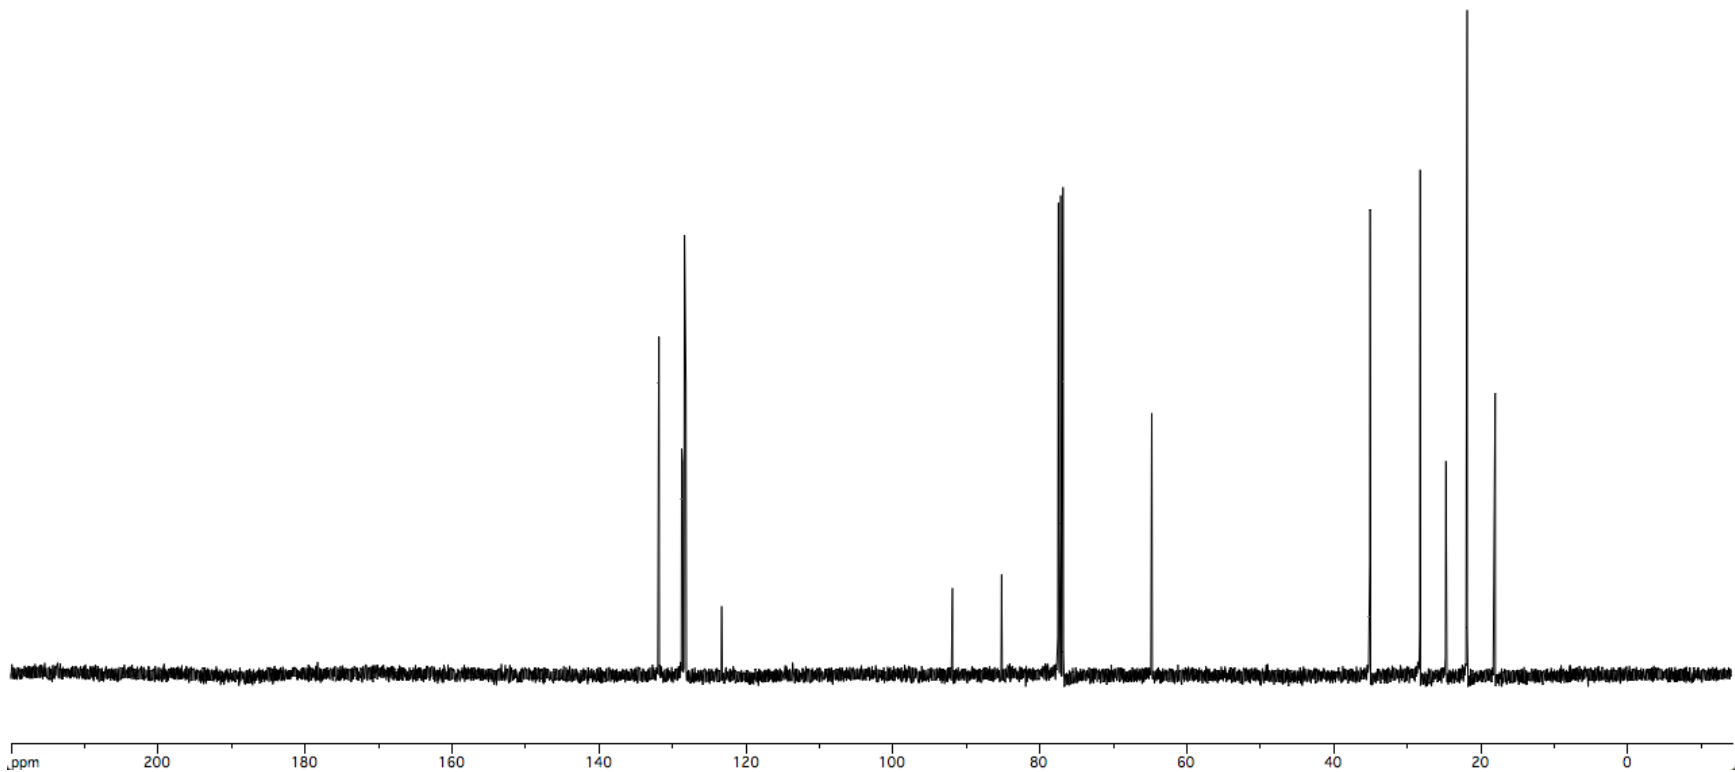

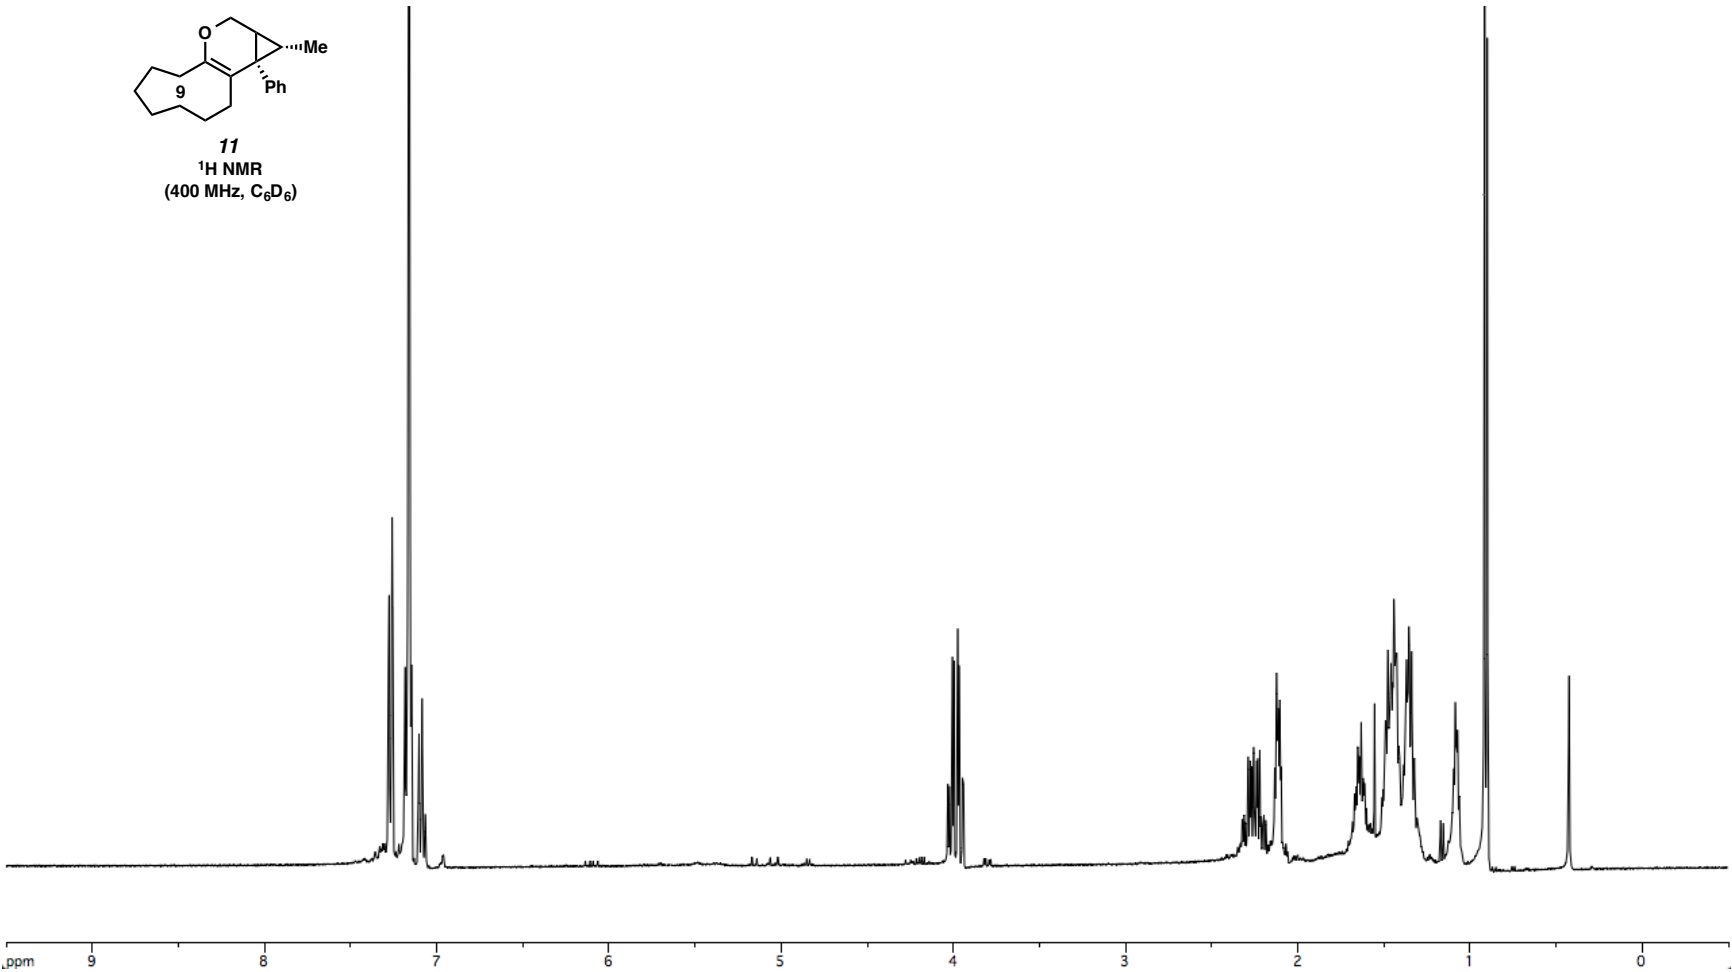

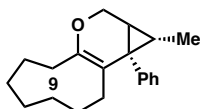

**11**  
<sup>13</sup>C NMR  
(100 MHz, C<sub>6</sub>D<sub>6</sub>)

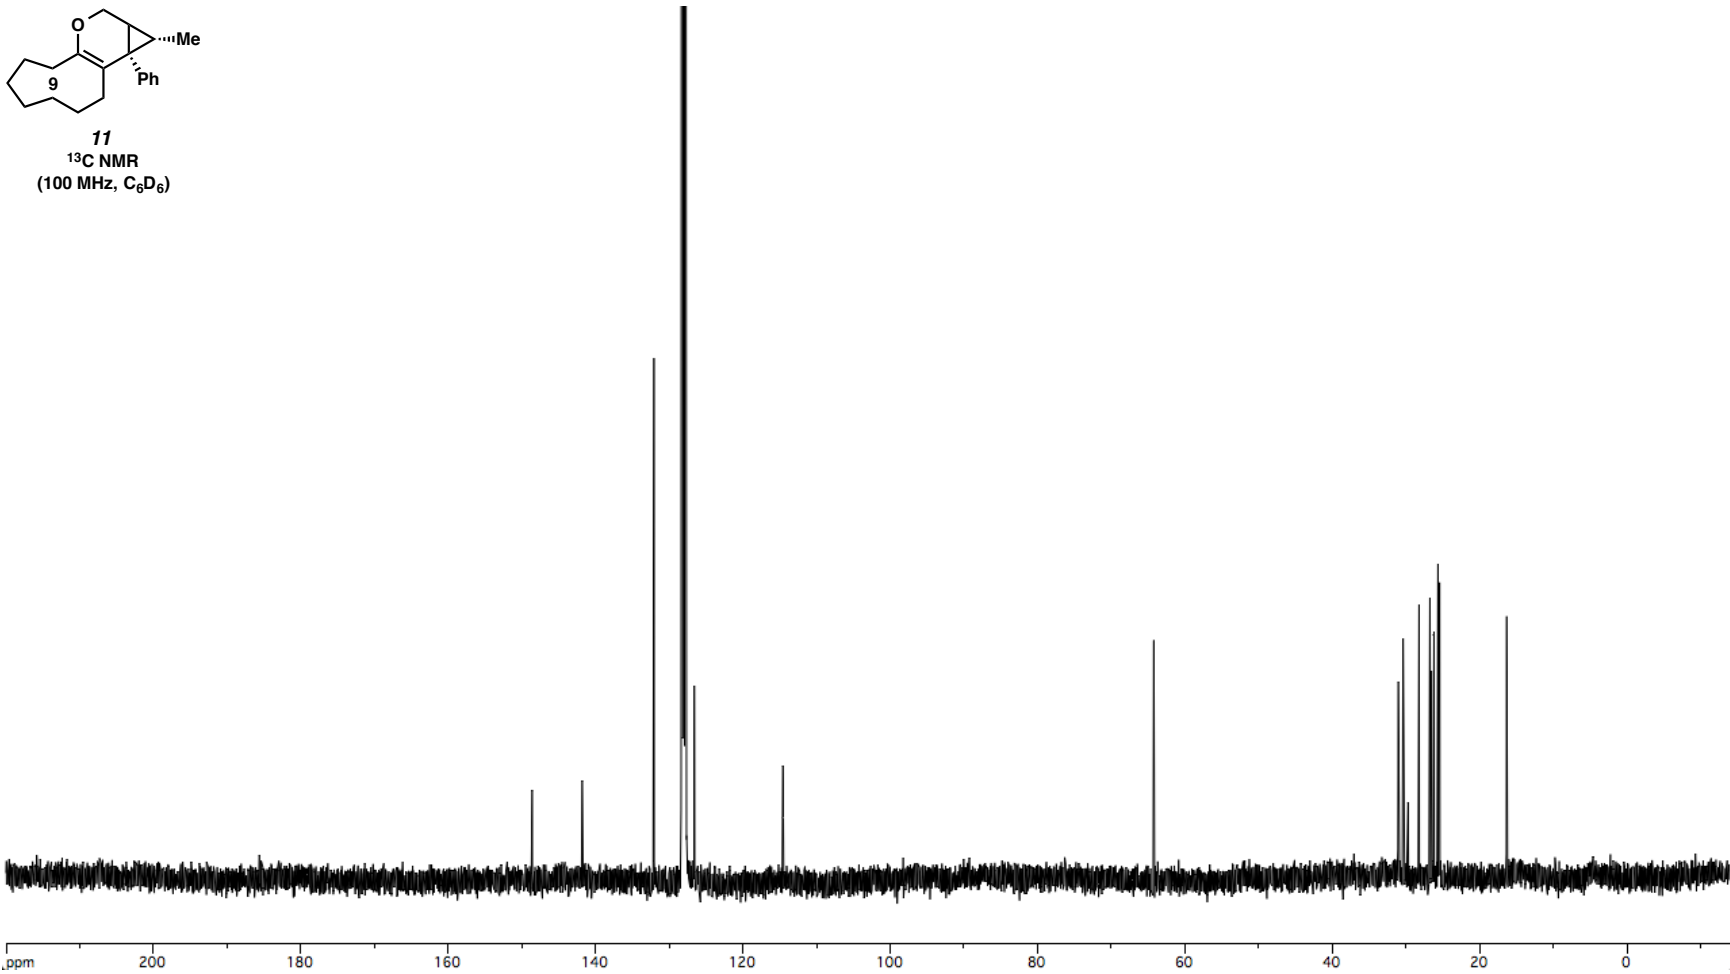

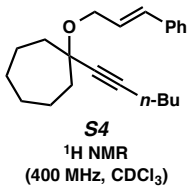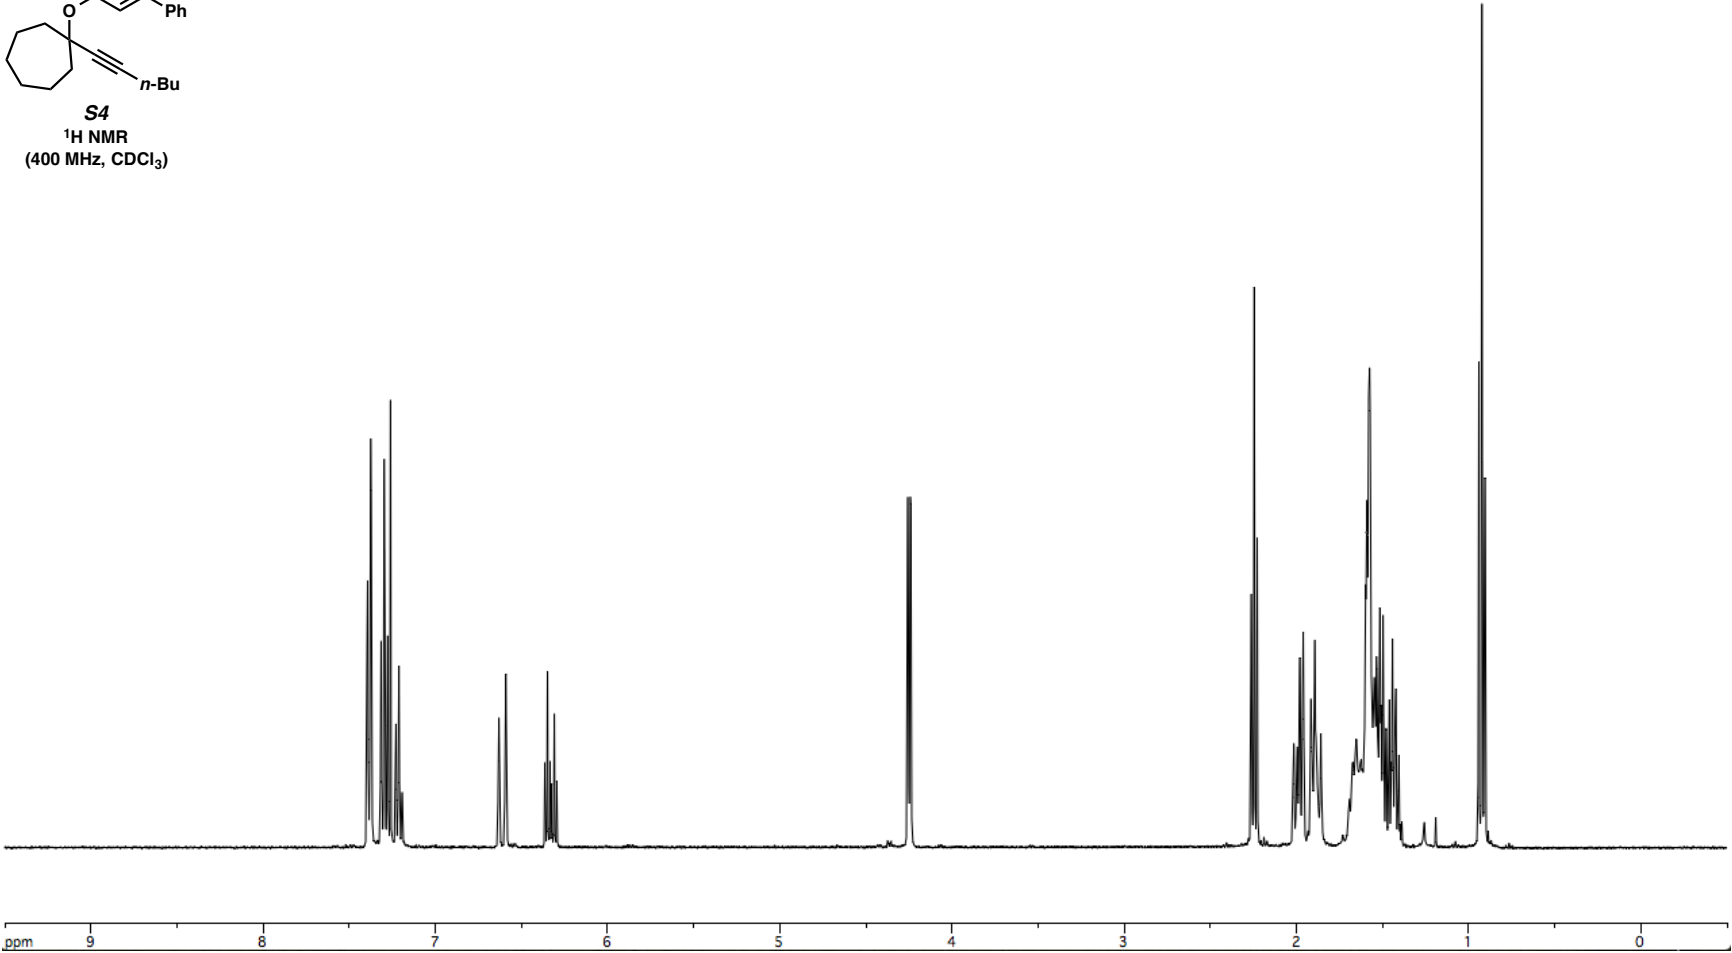

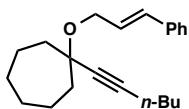

**S4**  
<sup>13</sup>C NMR  
(100 MHz, CDCl<sub>3</sub>)

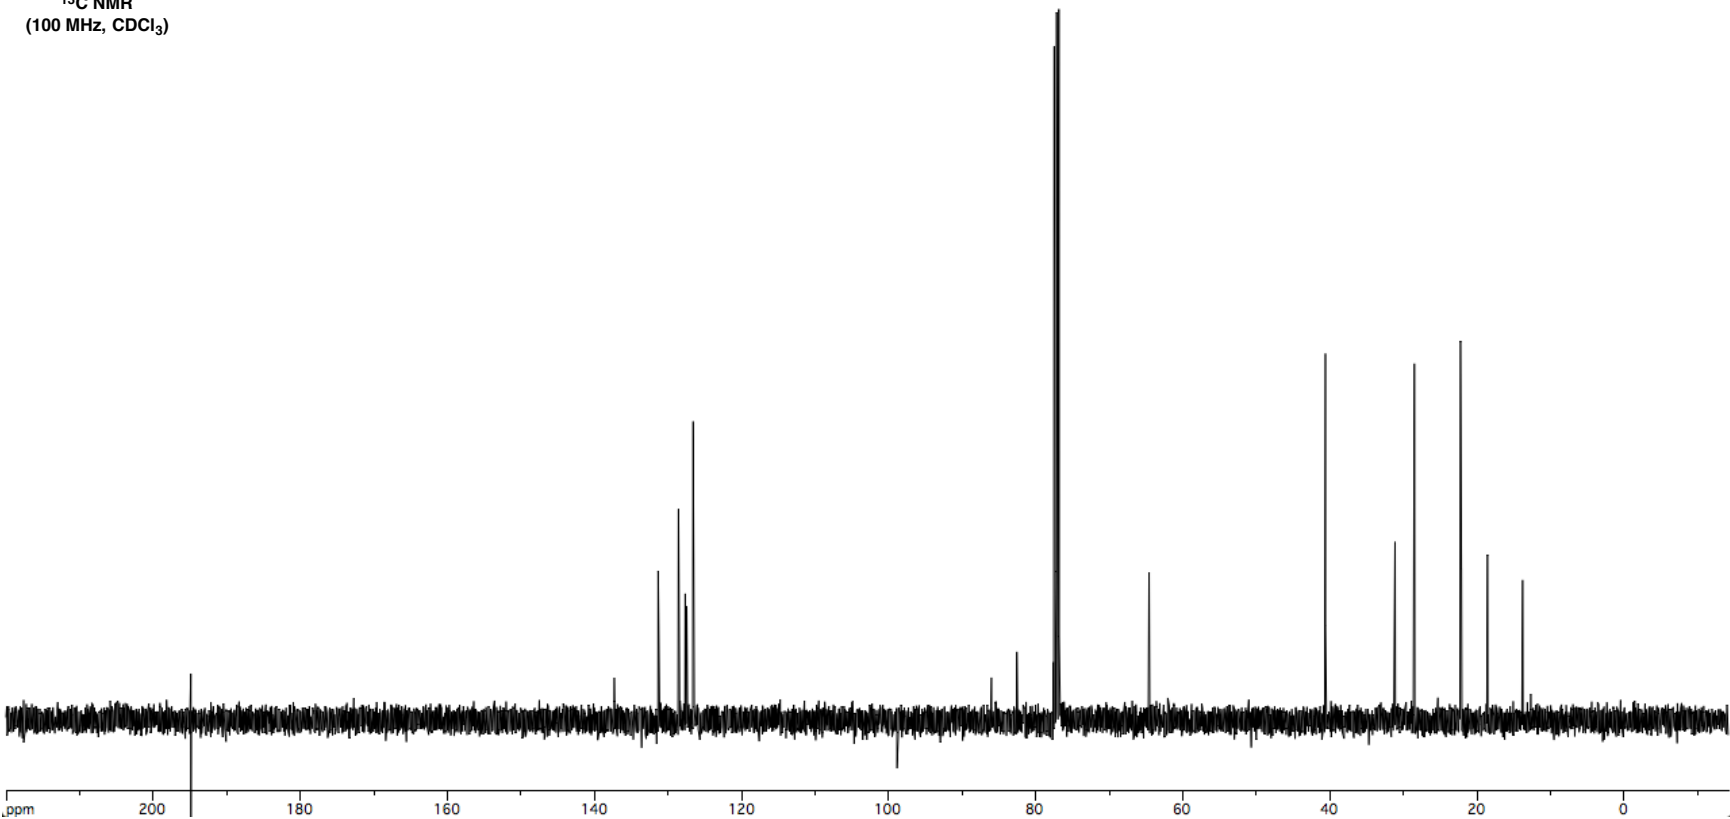

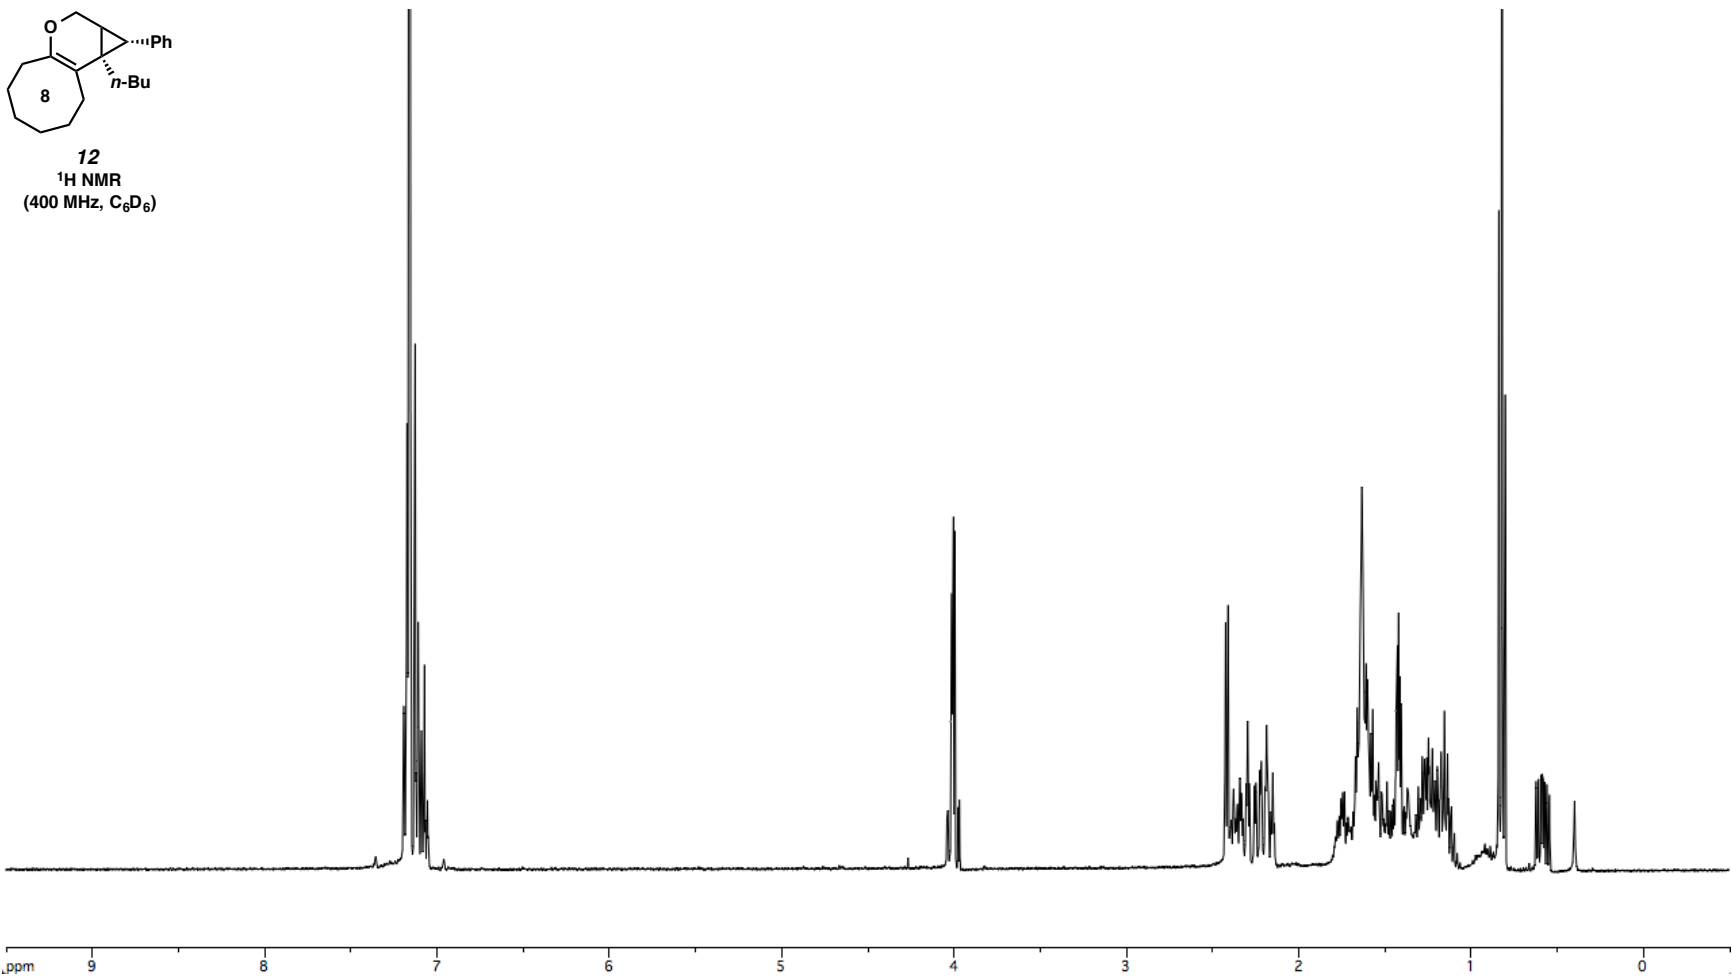



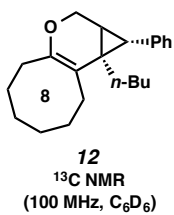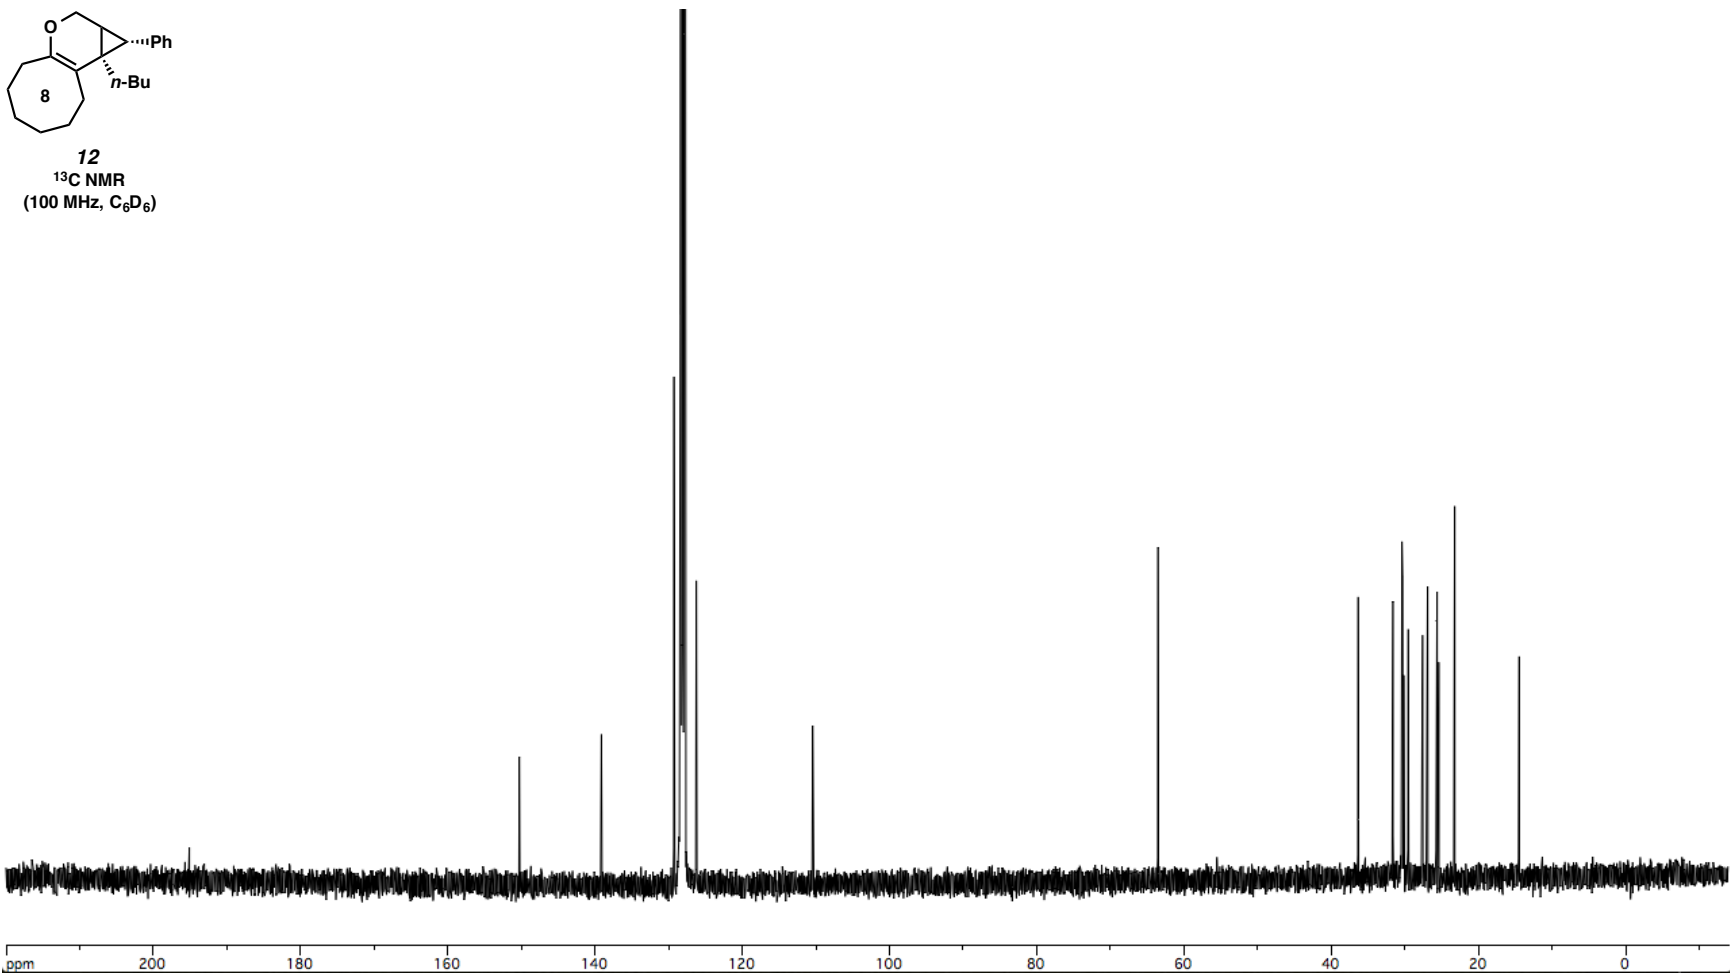

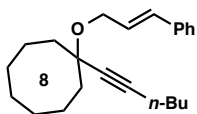

**S5**  
<sup>1</sup>H NMR  
(400 MHz, CDCl<sub>3</sub>)

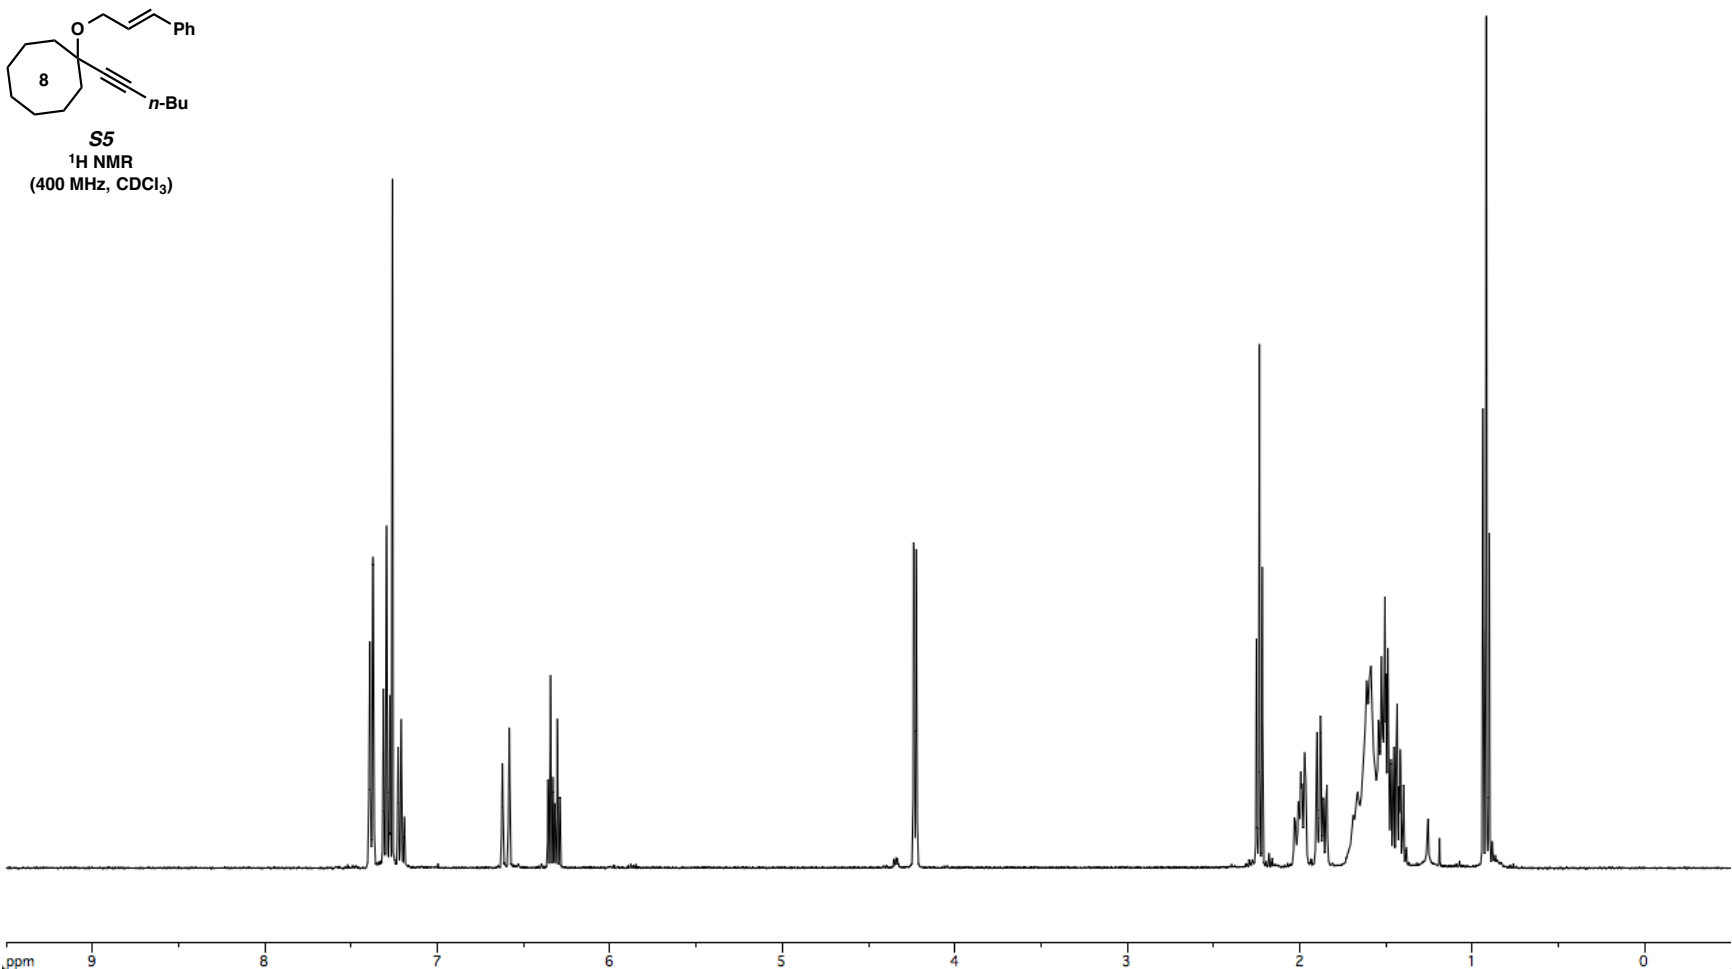

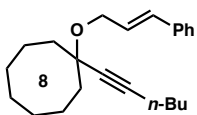

**S5**  
<sup>13</sup>C NMR  
(100 MHz, CDCl<sub>3</sub>)

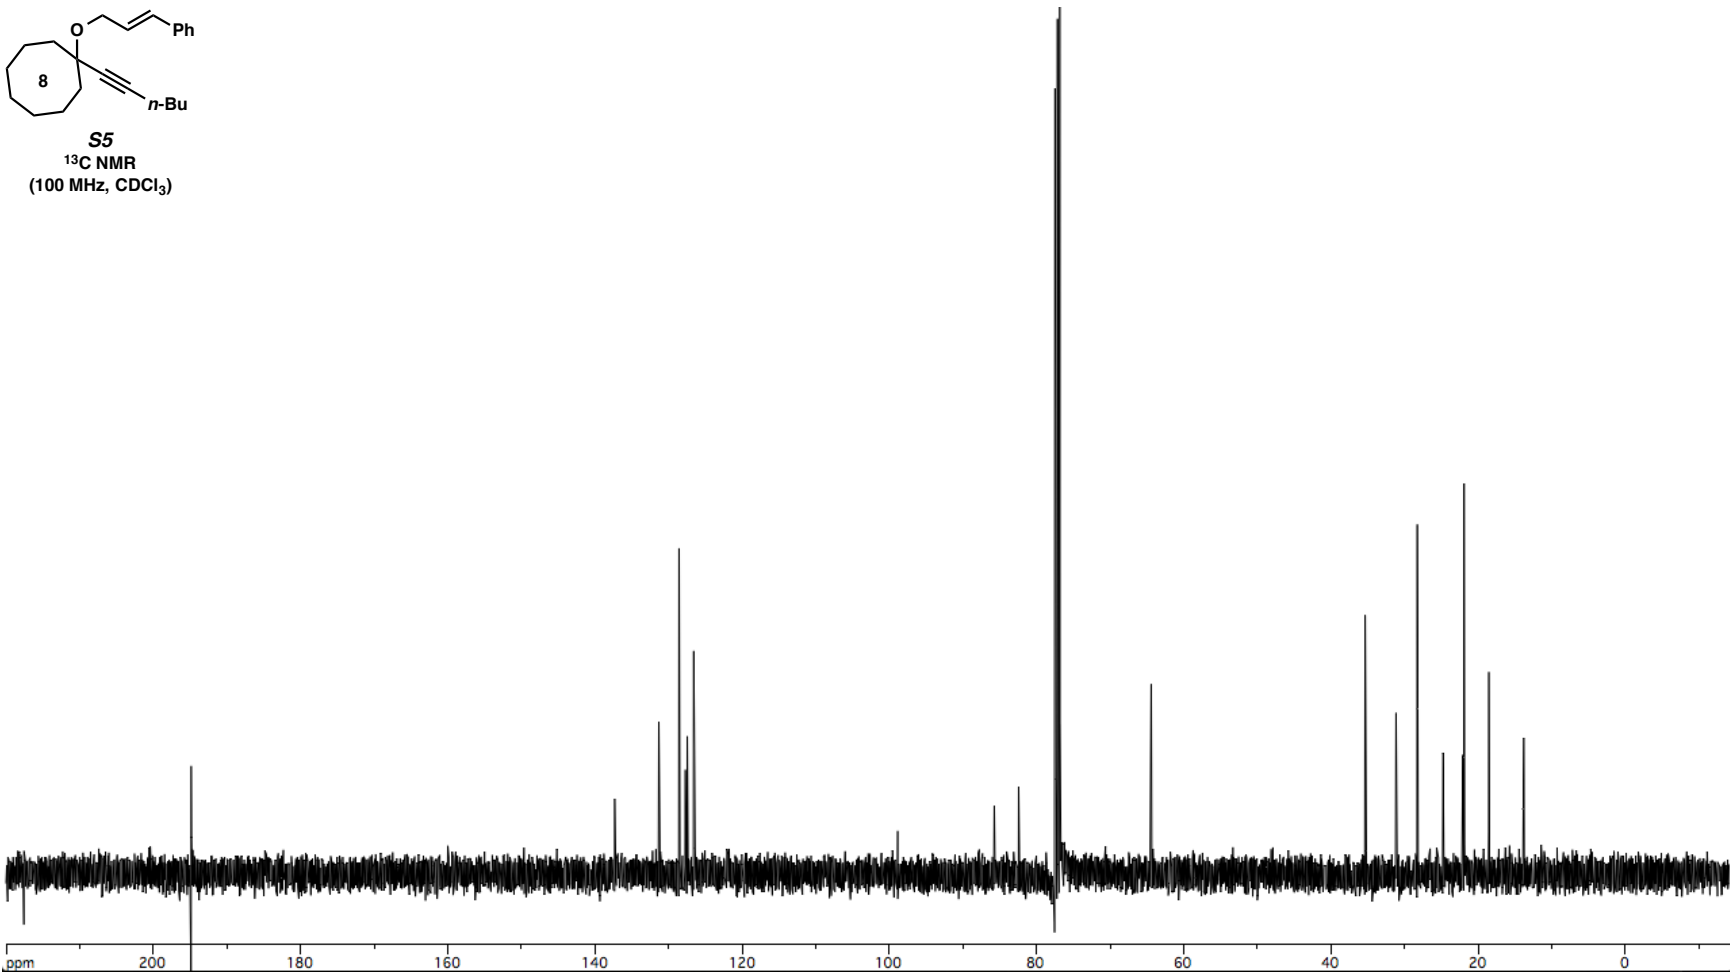

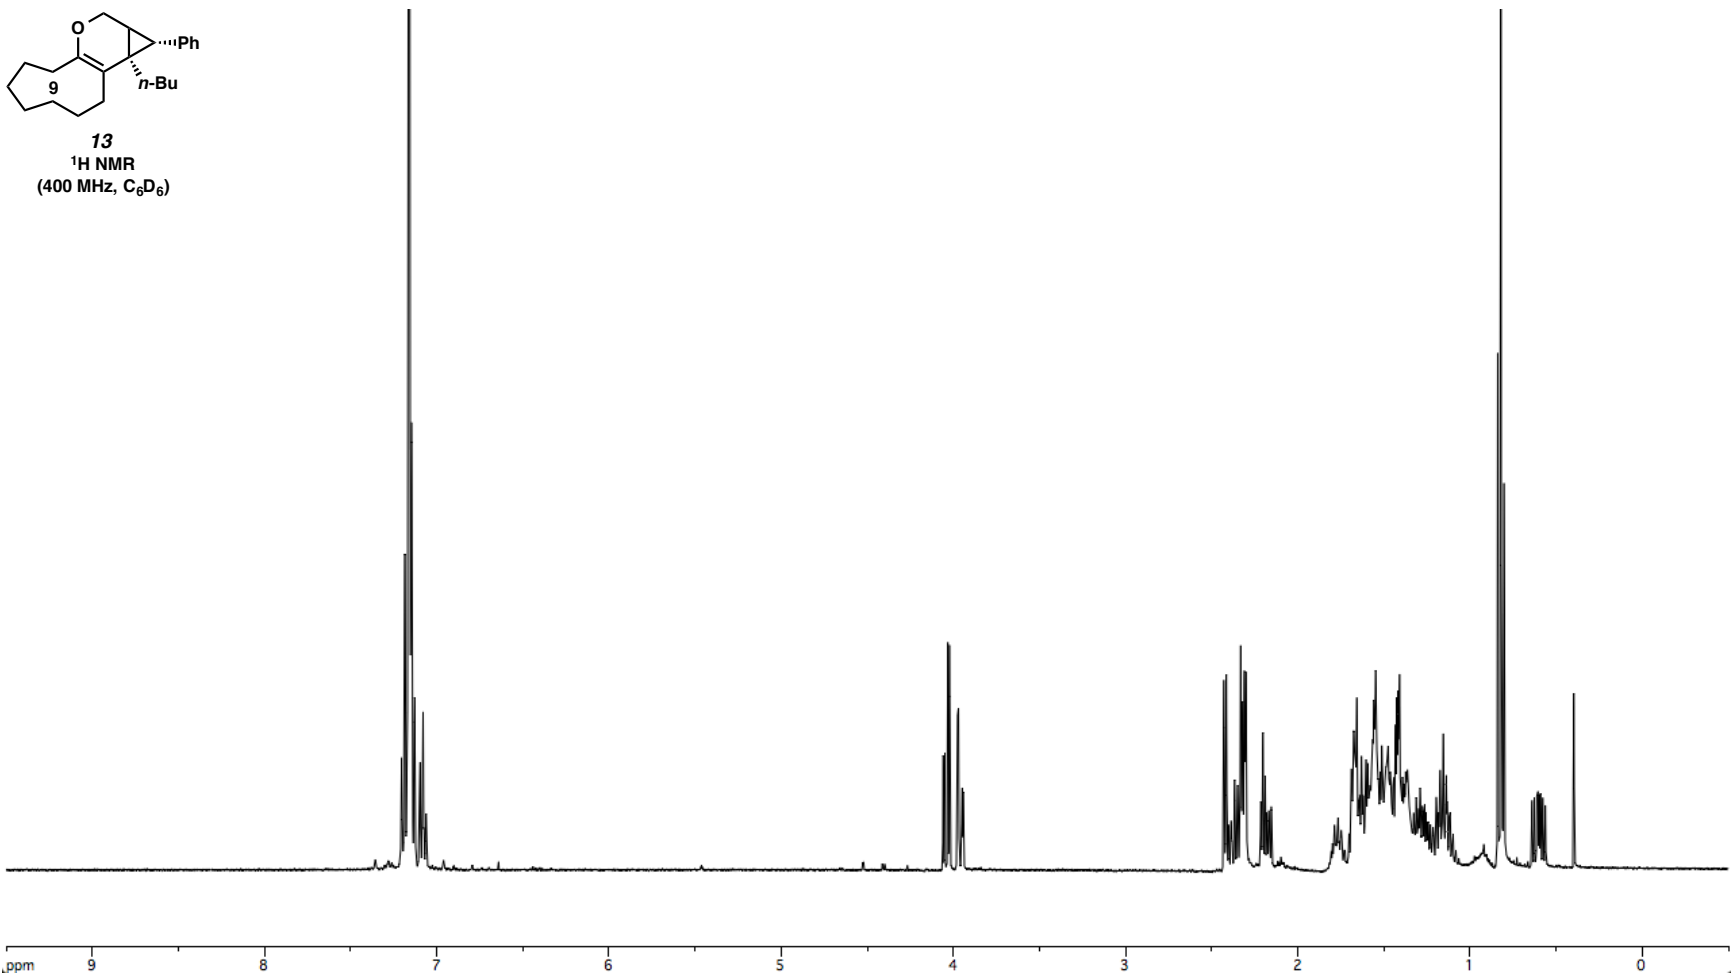

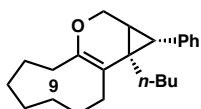

**13**  
<sup>13</sup>C NMR  
(100 MHz, C<sub>6</sub>D<sub>6</sub>)

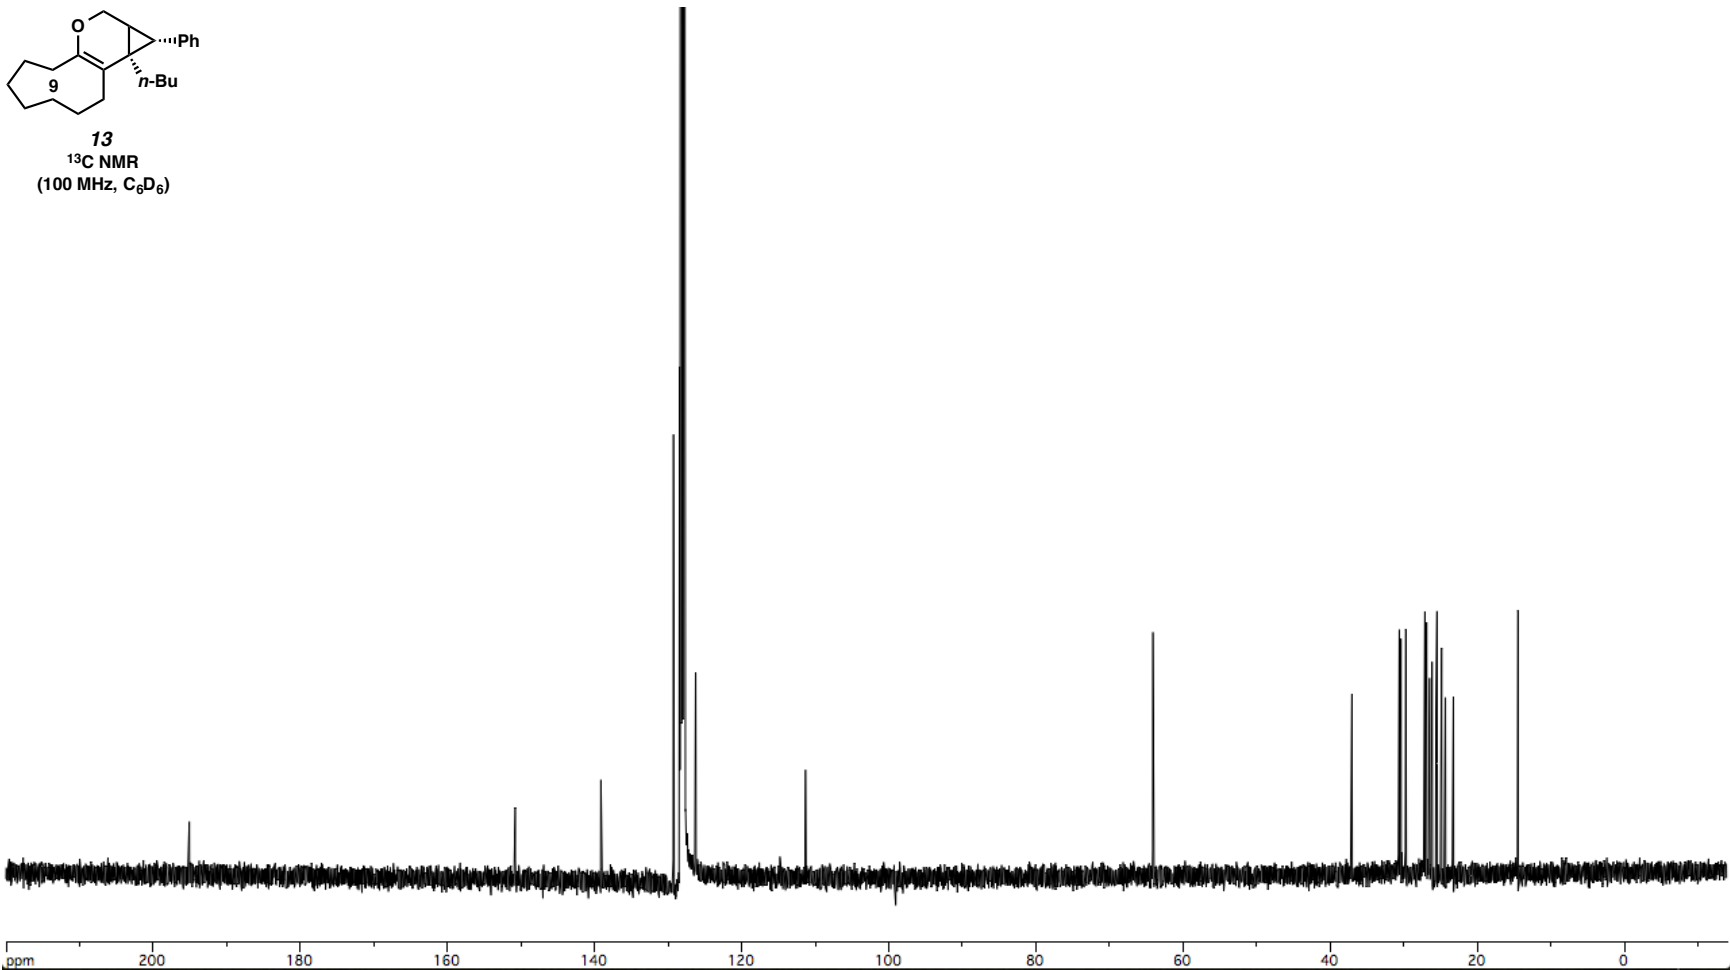

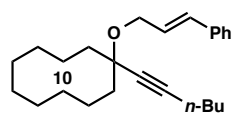

**S6**  
**<sup>1</sup>H NMR**  
(400 MHz, CDCl<sub>3</sub>)

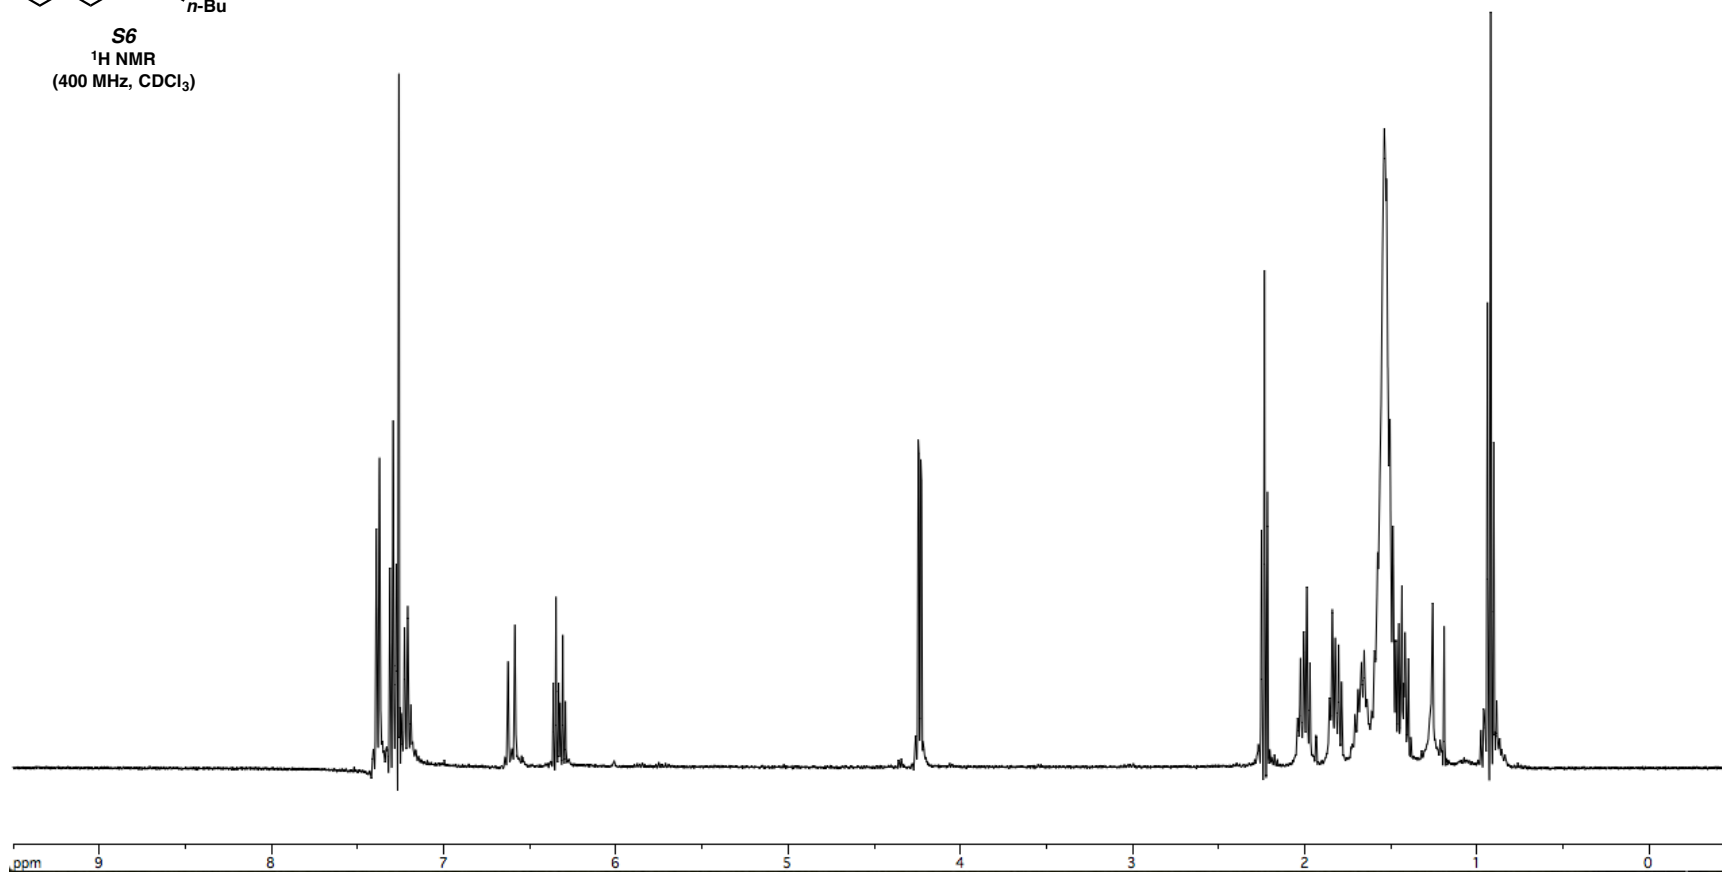

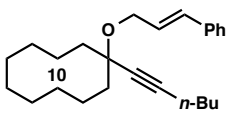

**S6**  
<sup>13</sup>C NMR  
(100 MHz, CDCl<sub>3</sub>)

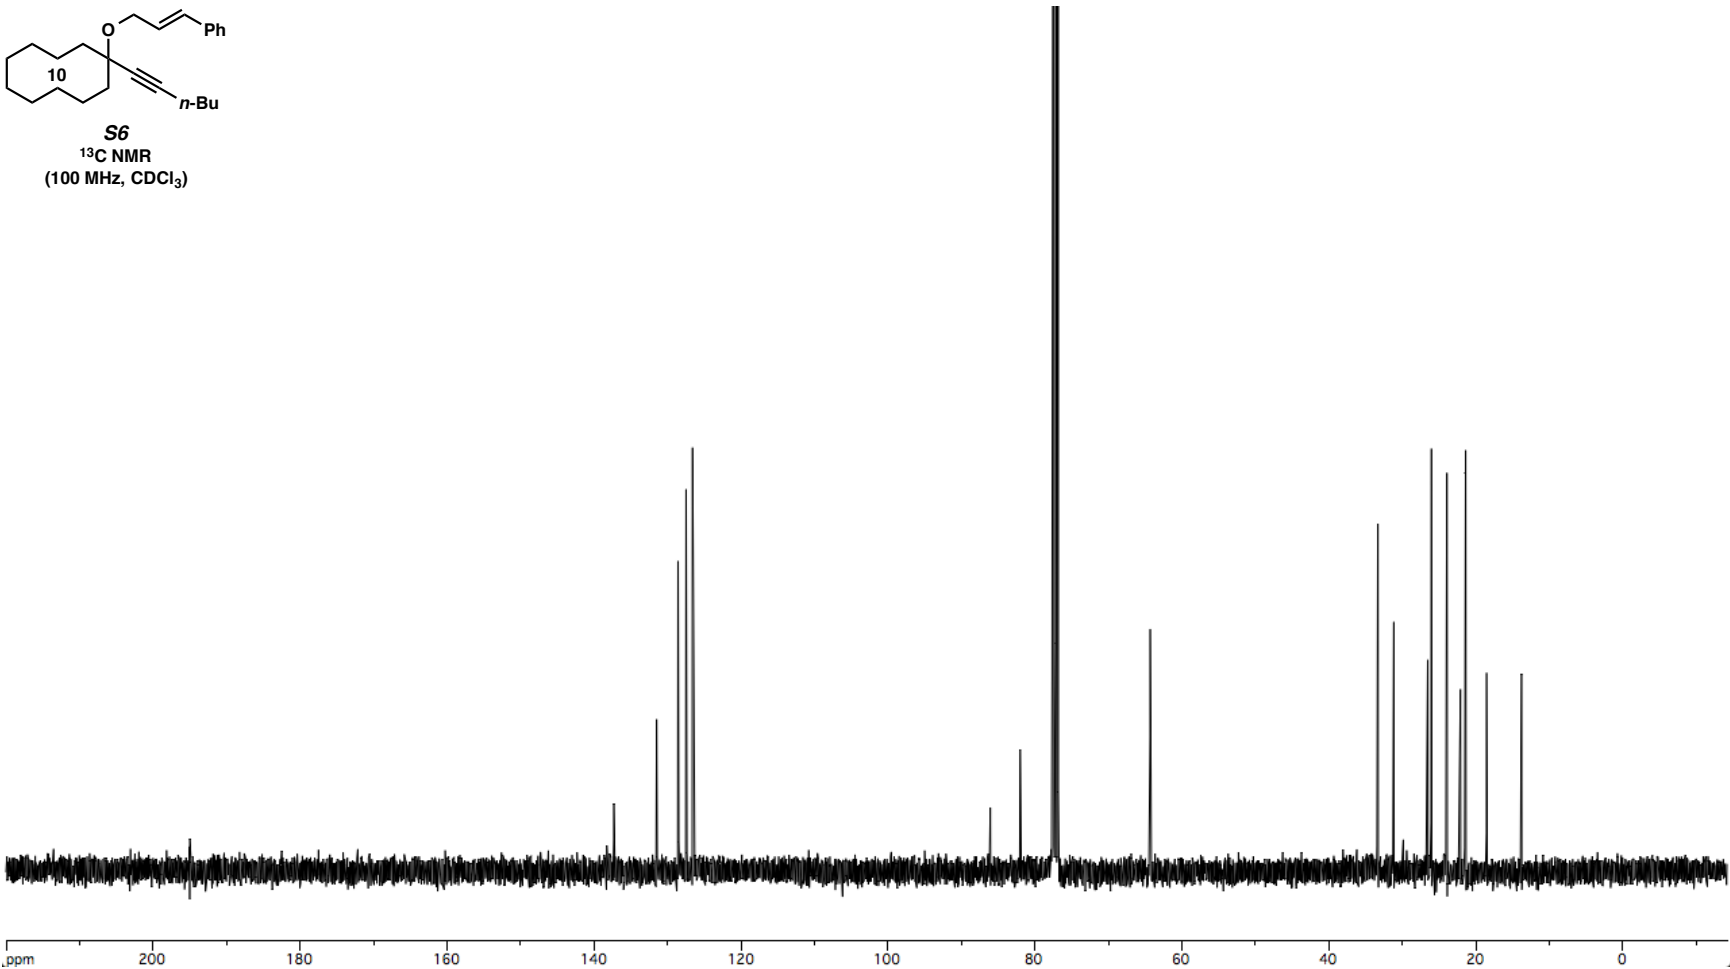

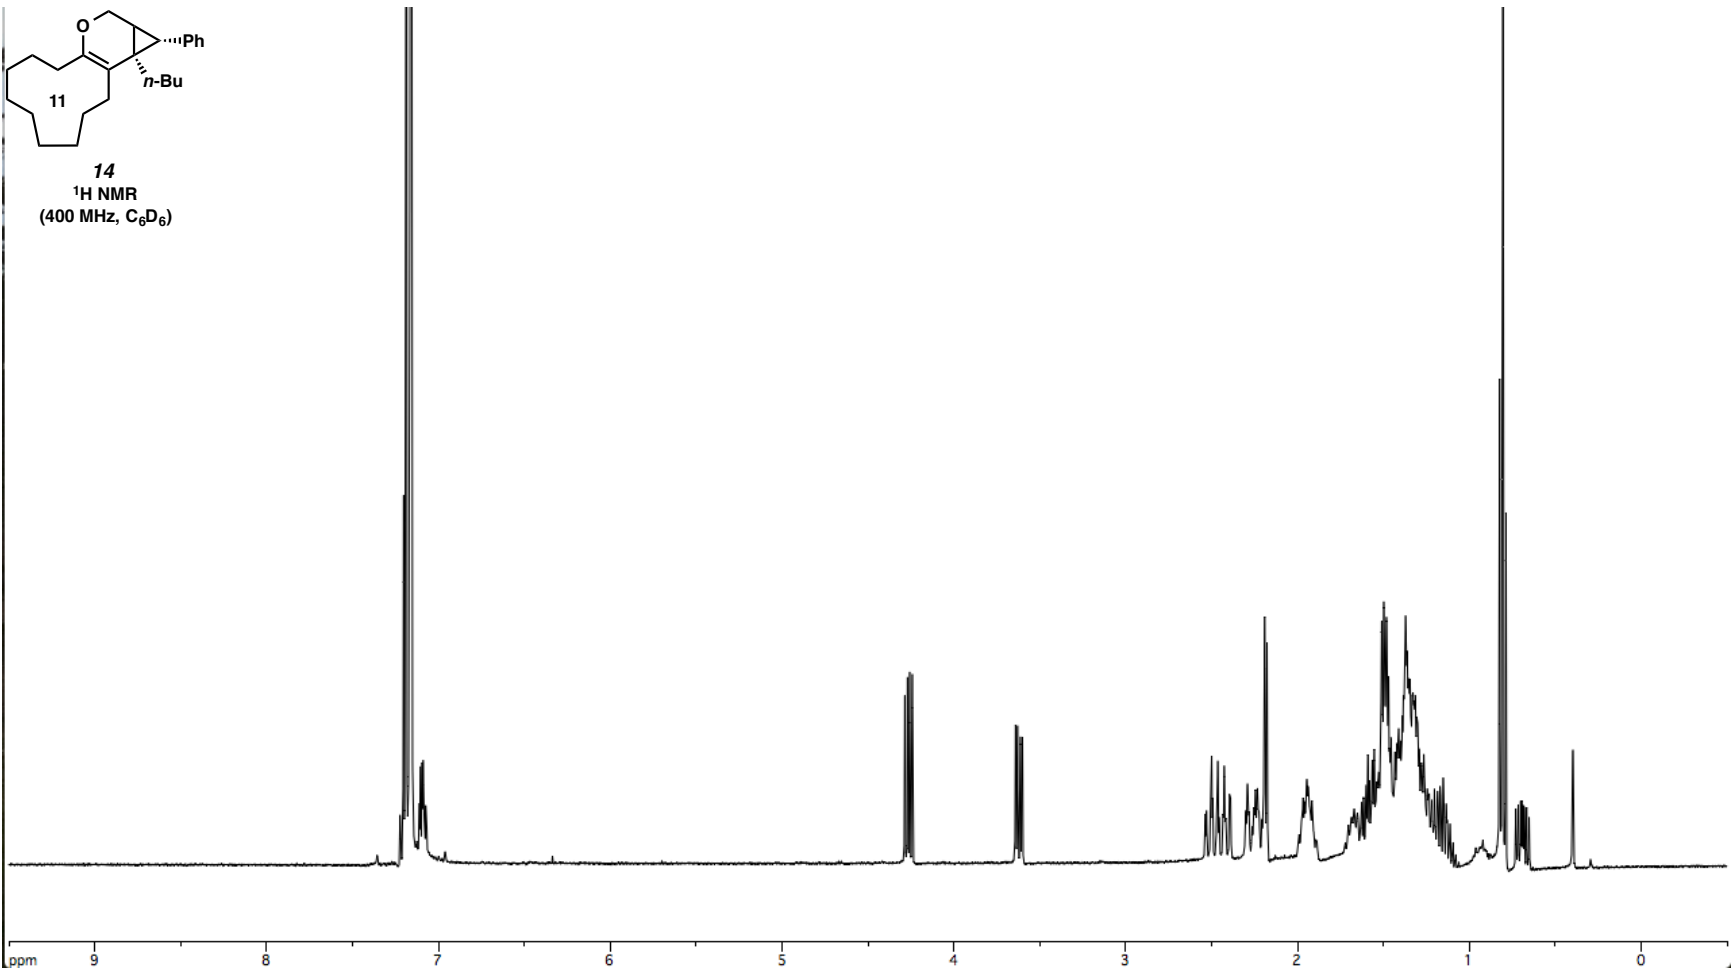



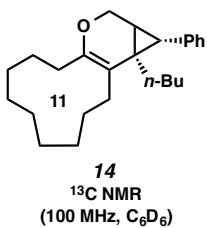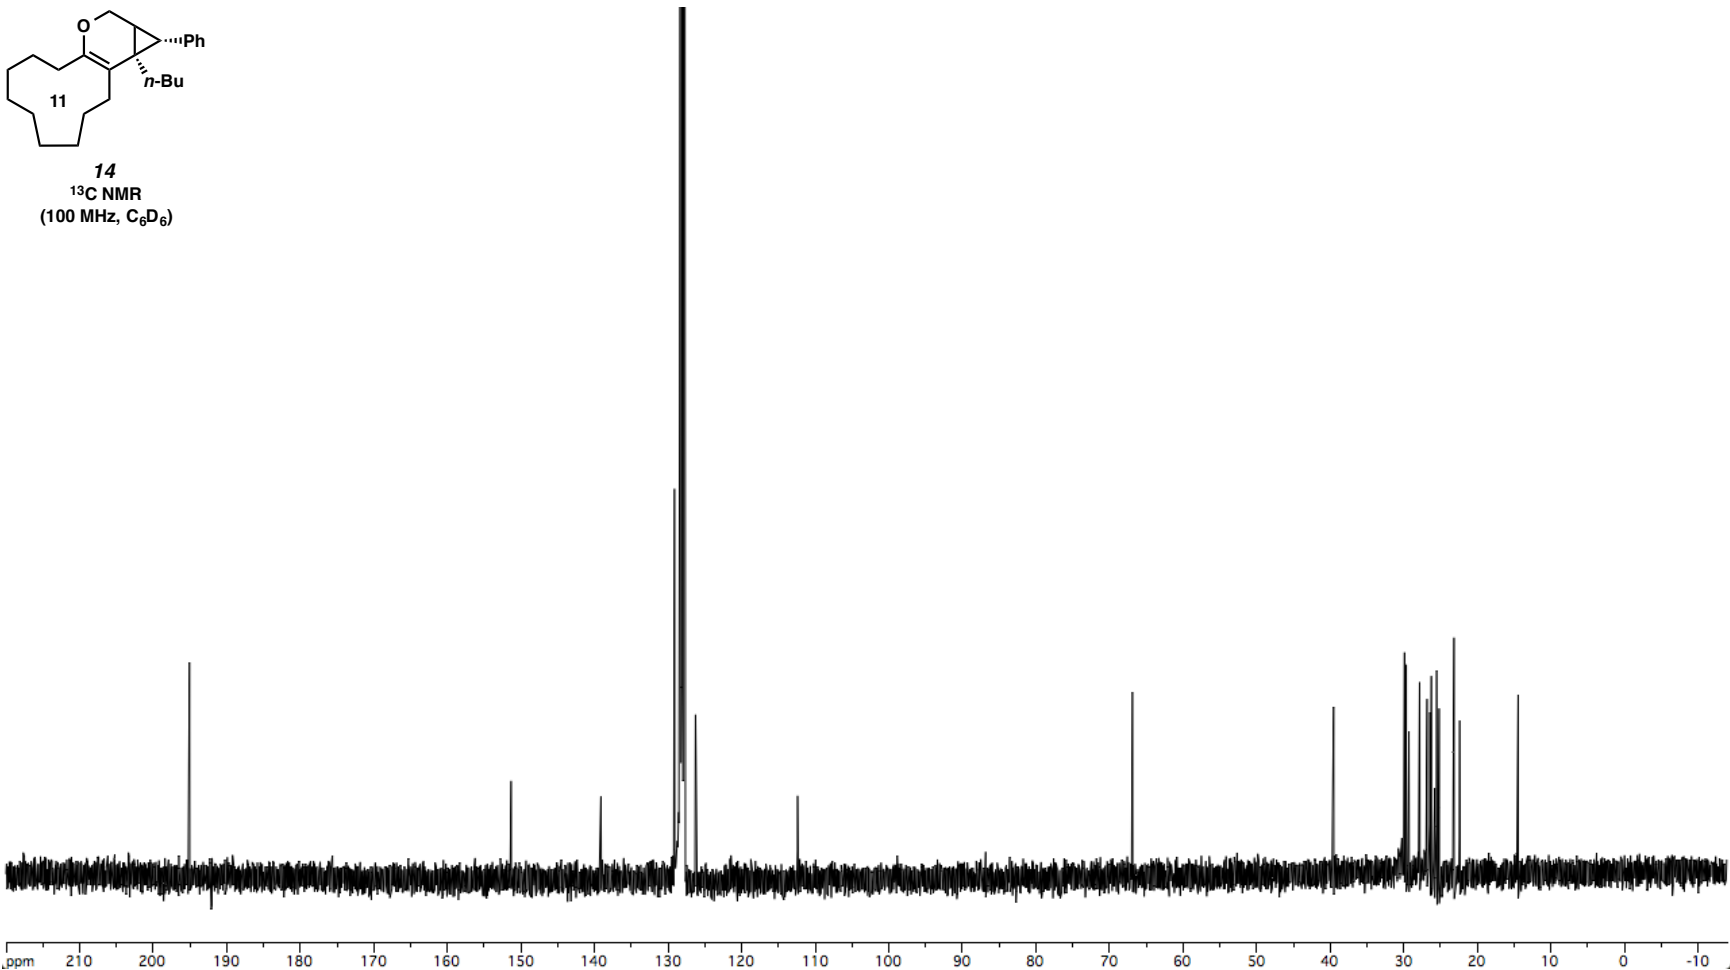

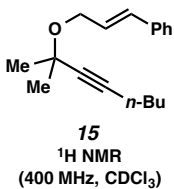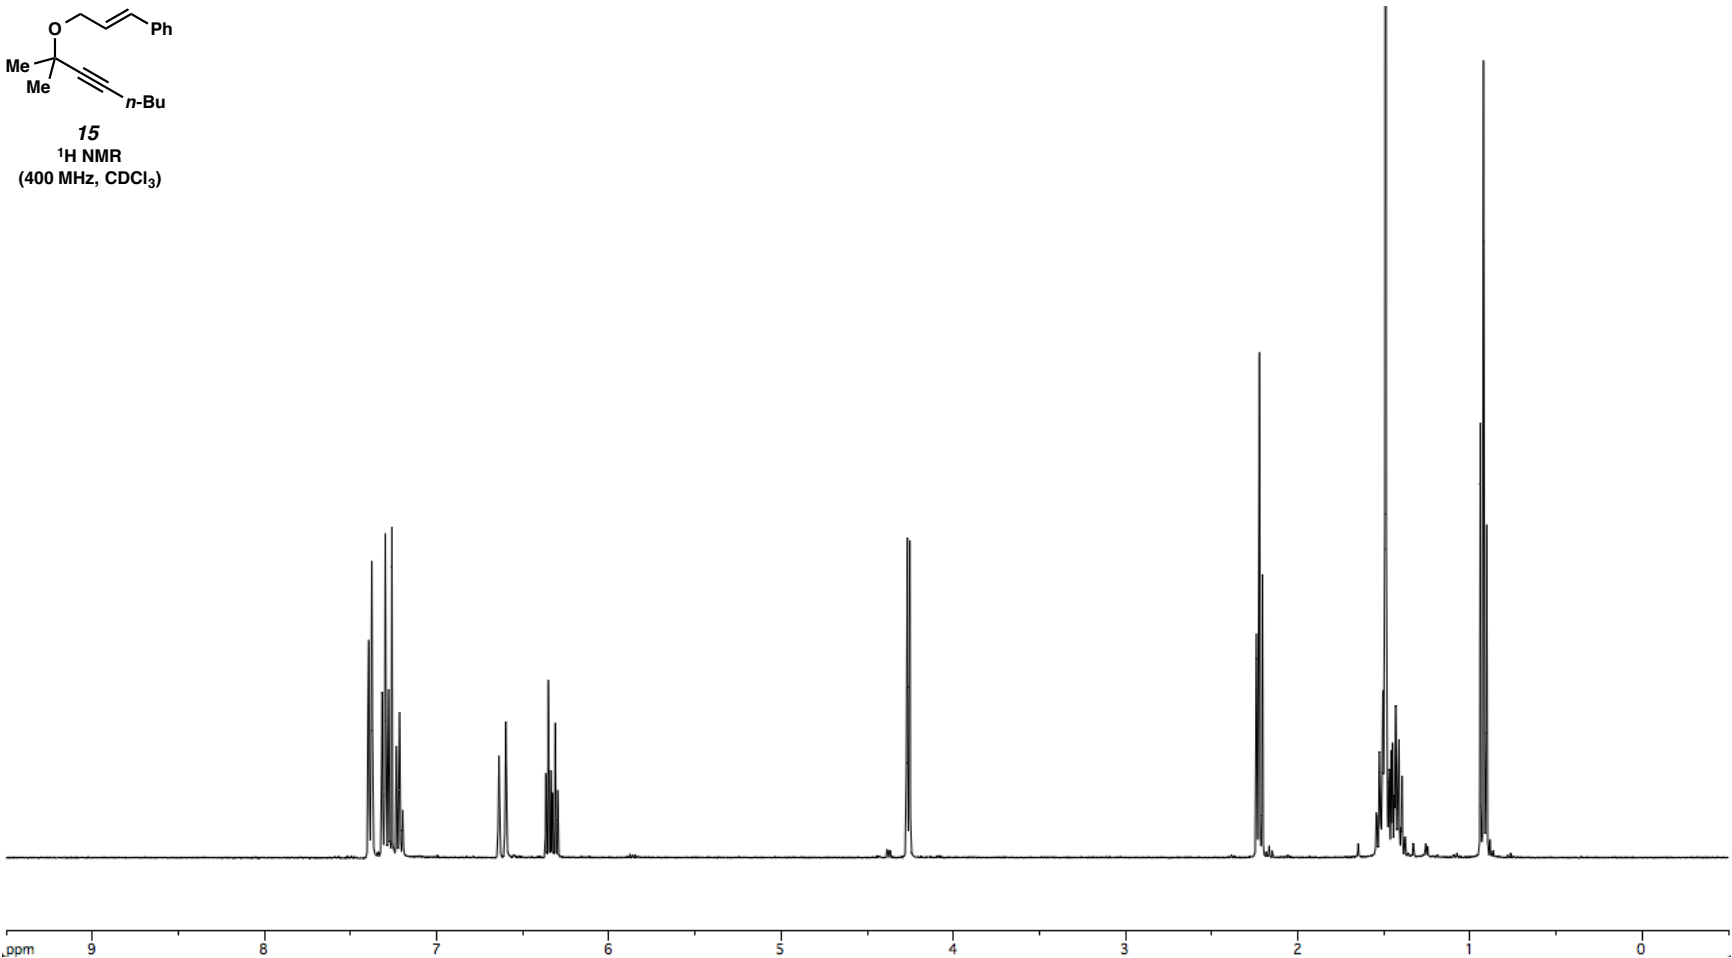

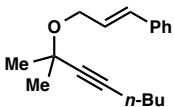

**15**  
<sup>13</sup>C NMR  
(100 MHz, CDCl<sub>3</sub>)

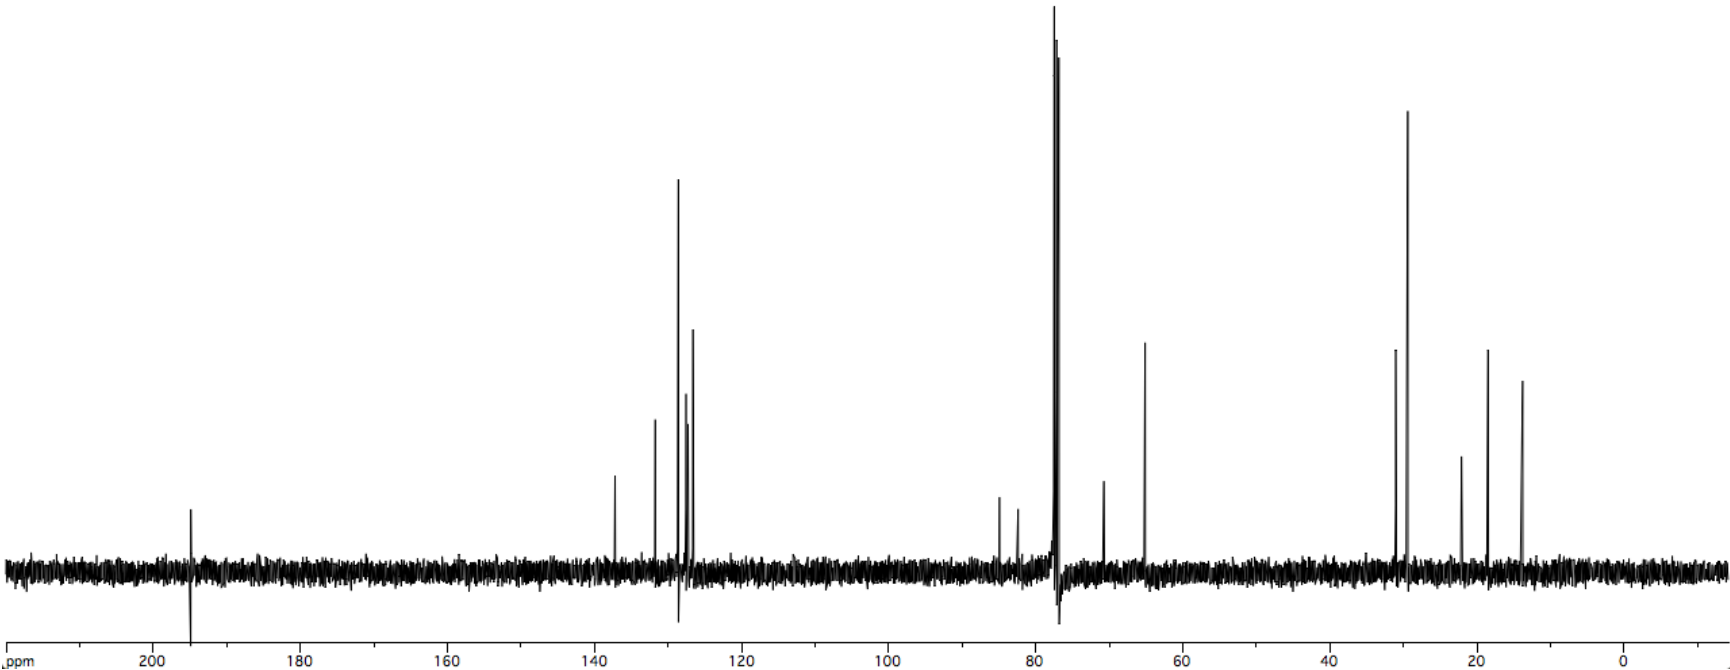

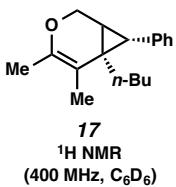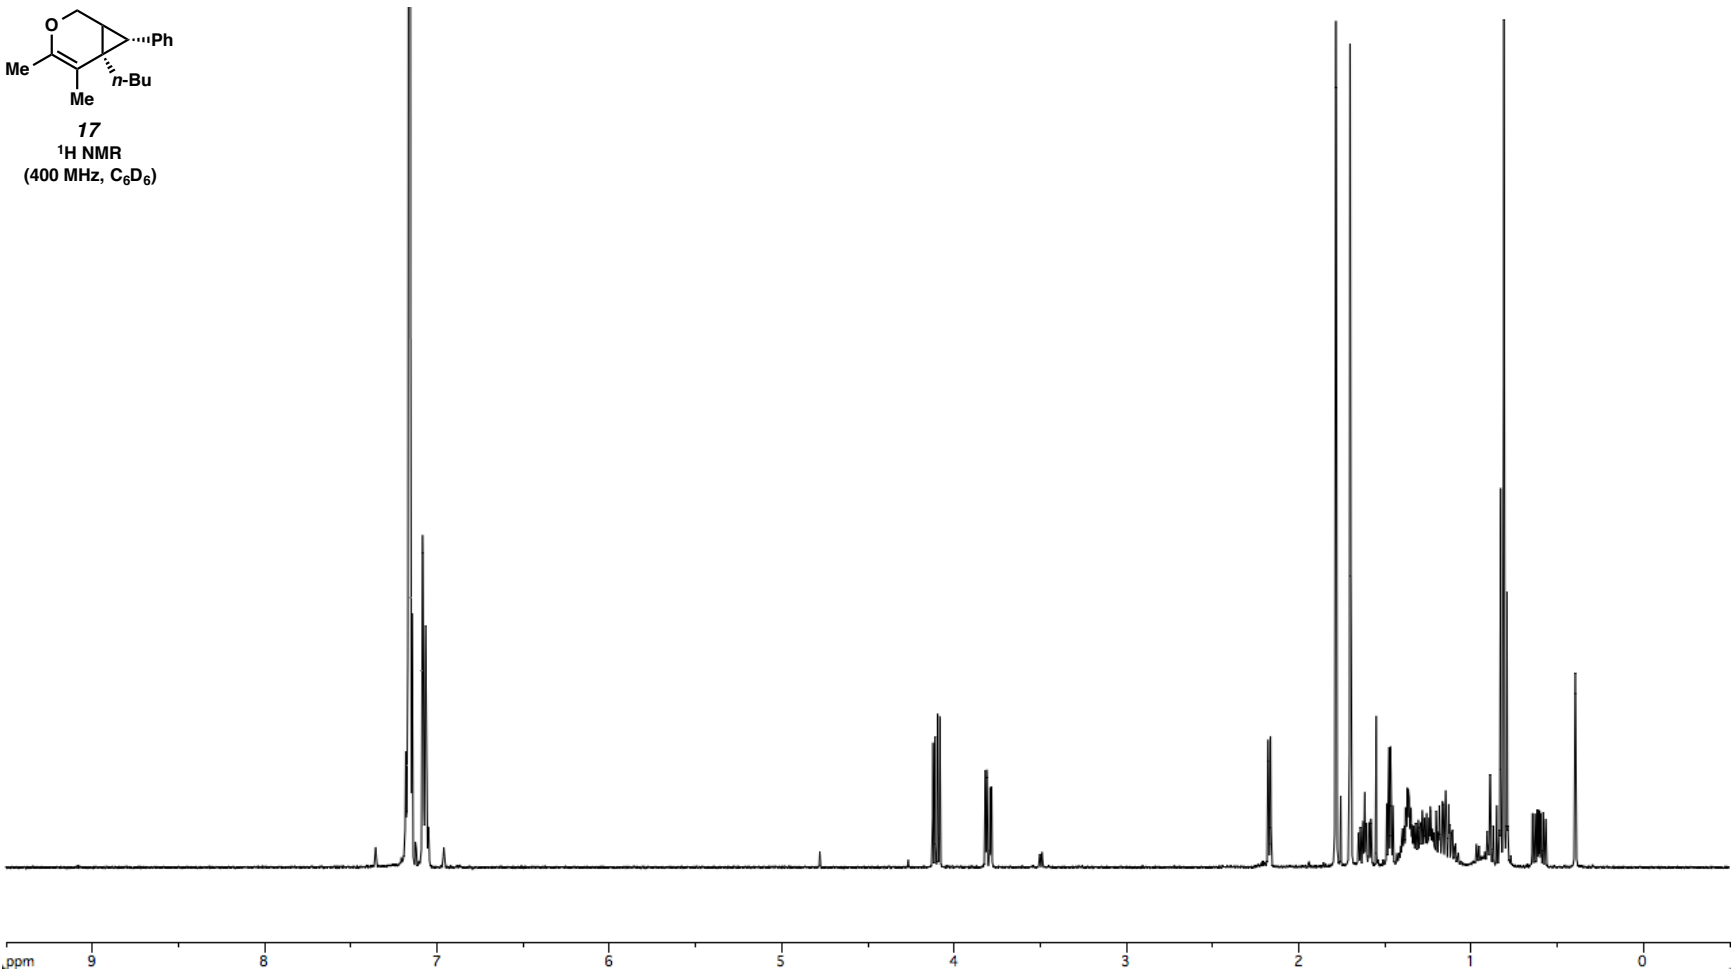

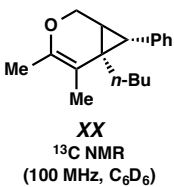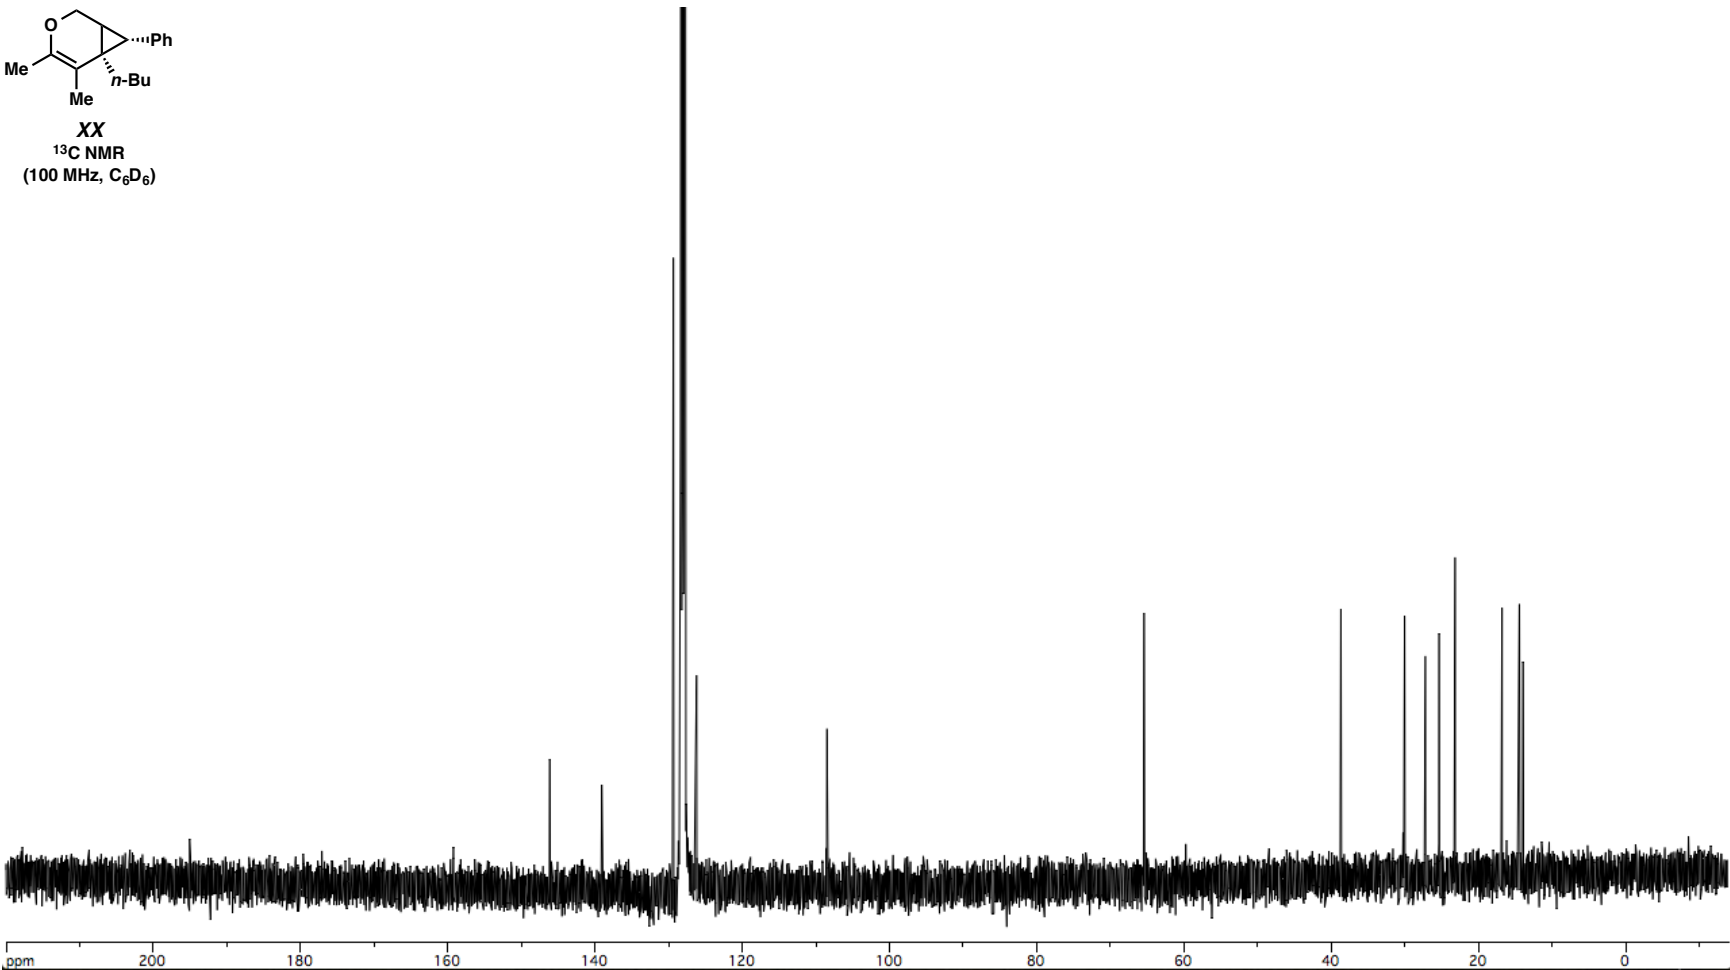

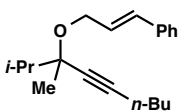

**16**  
<sup>1</sup>H NMR  
(400 MHz, CDCl<sub>3</sub>)

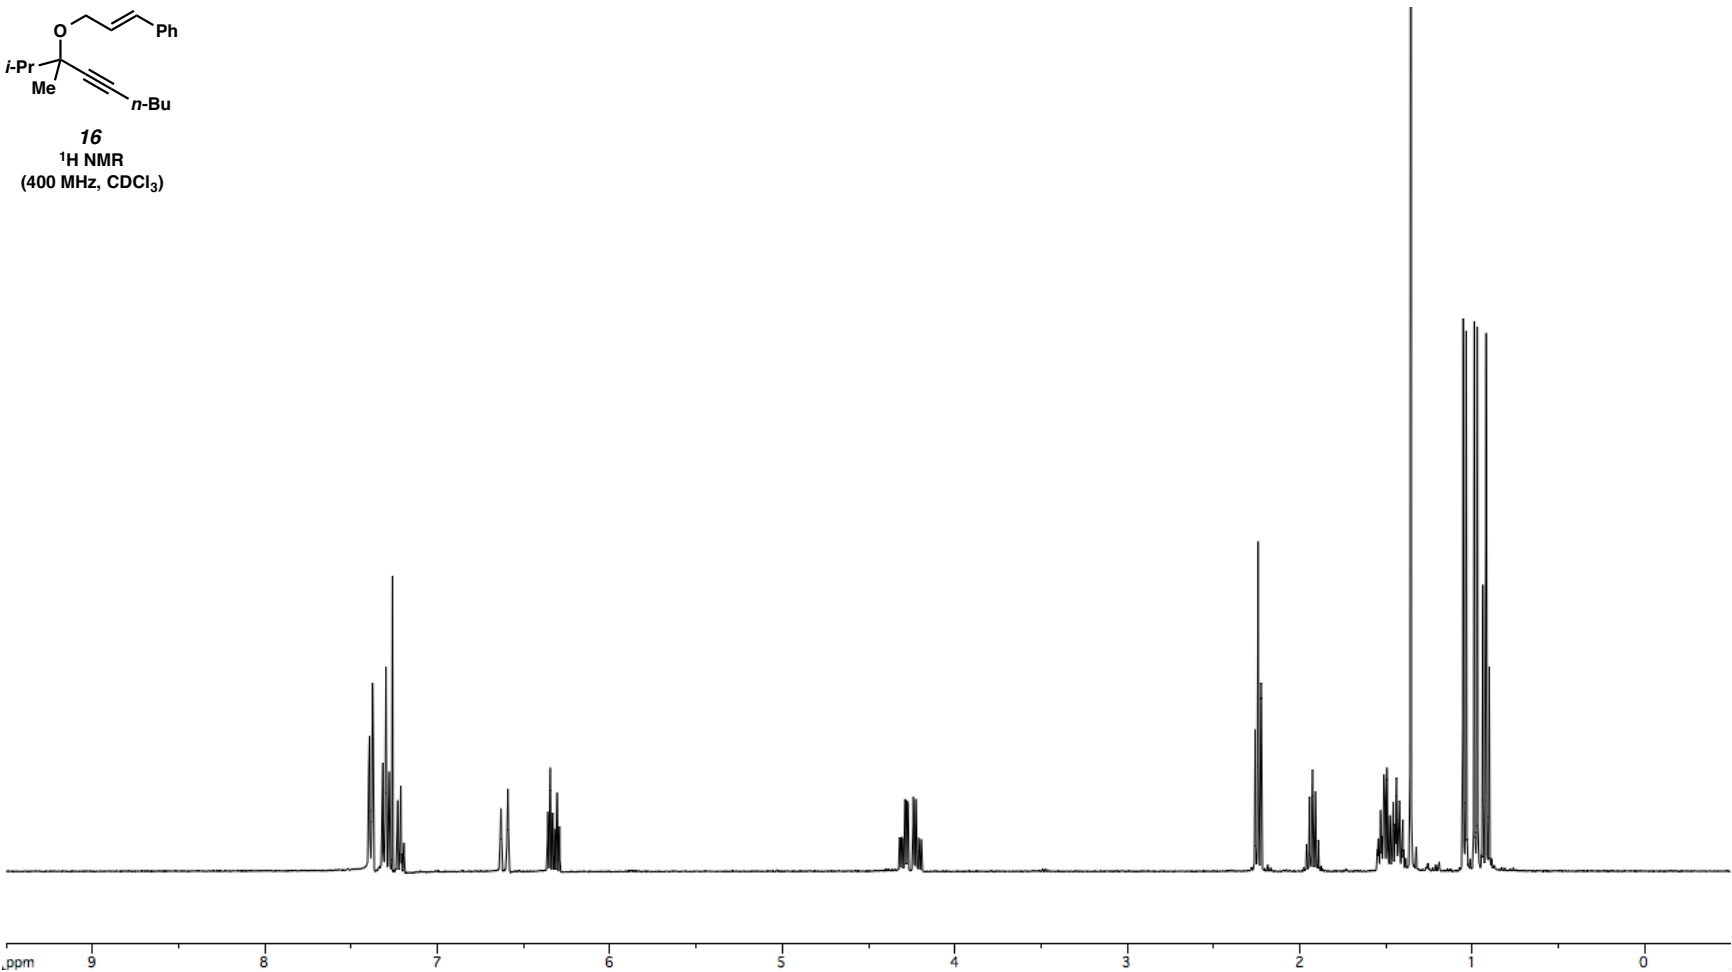

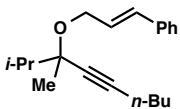

**16**  
<sup>13</sup>C NMR  
(100 MHz, CDCl<sub>3</sub>)

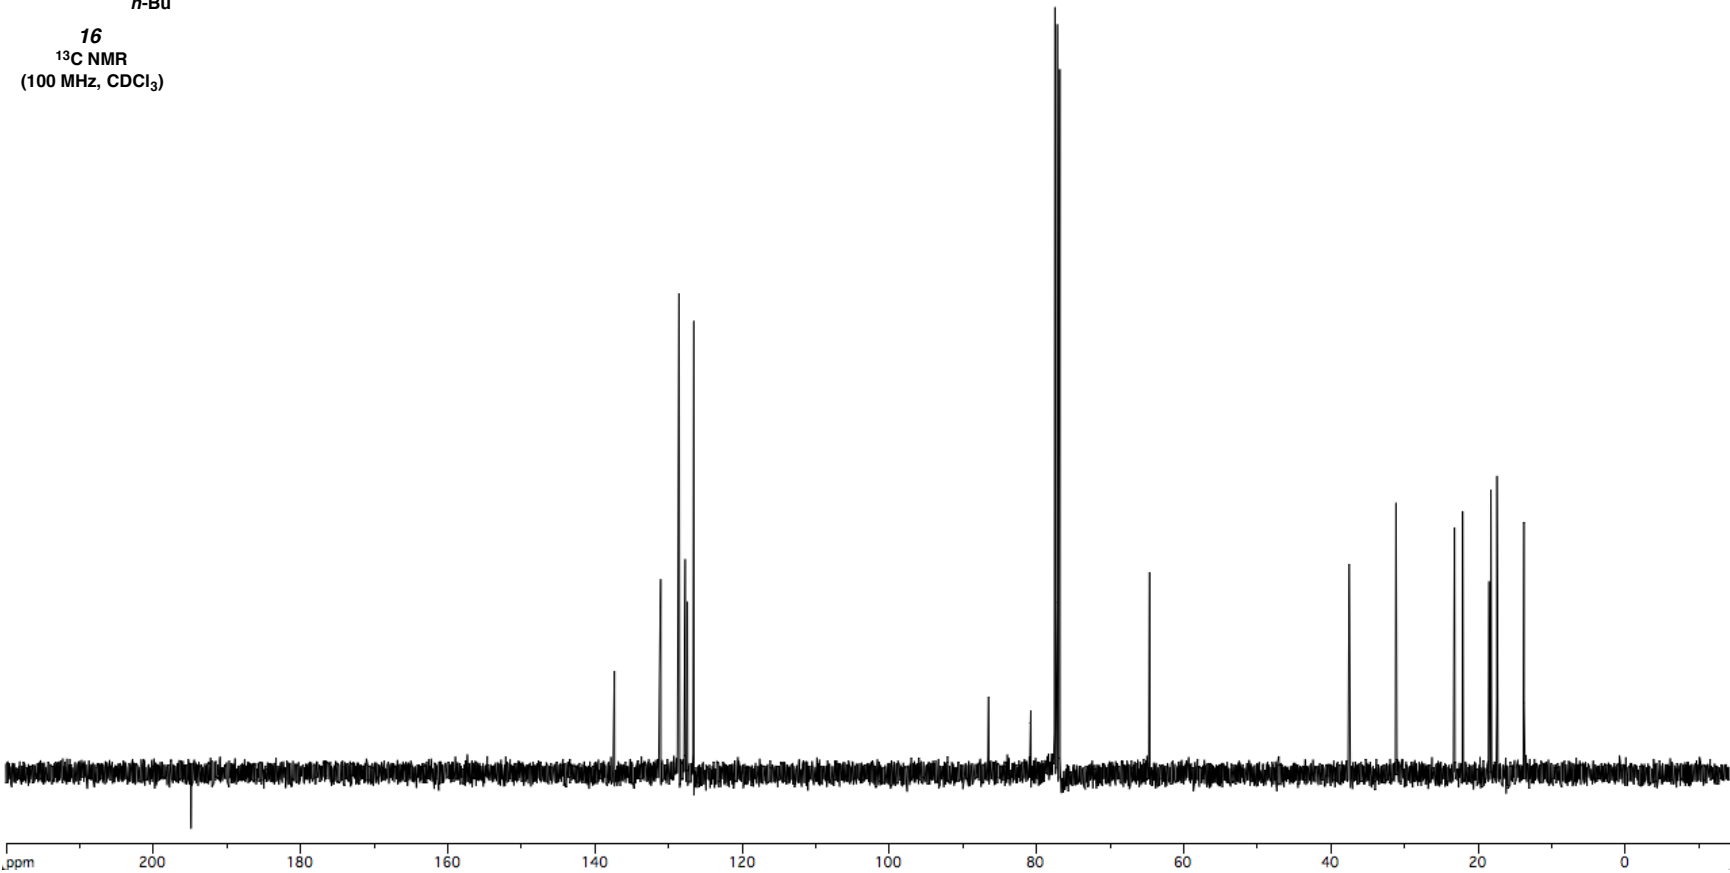

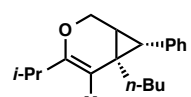

**18**  
<sup>1</sup>H NMR  
(400 MHz, C<sub>6</sub>D<sub>6</sub>)

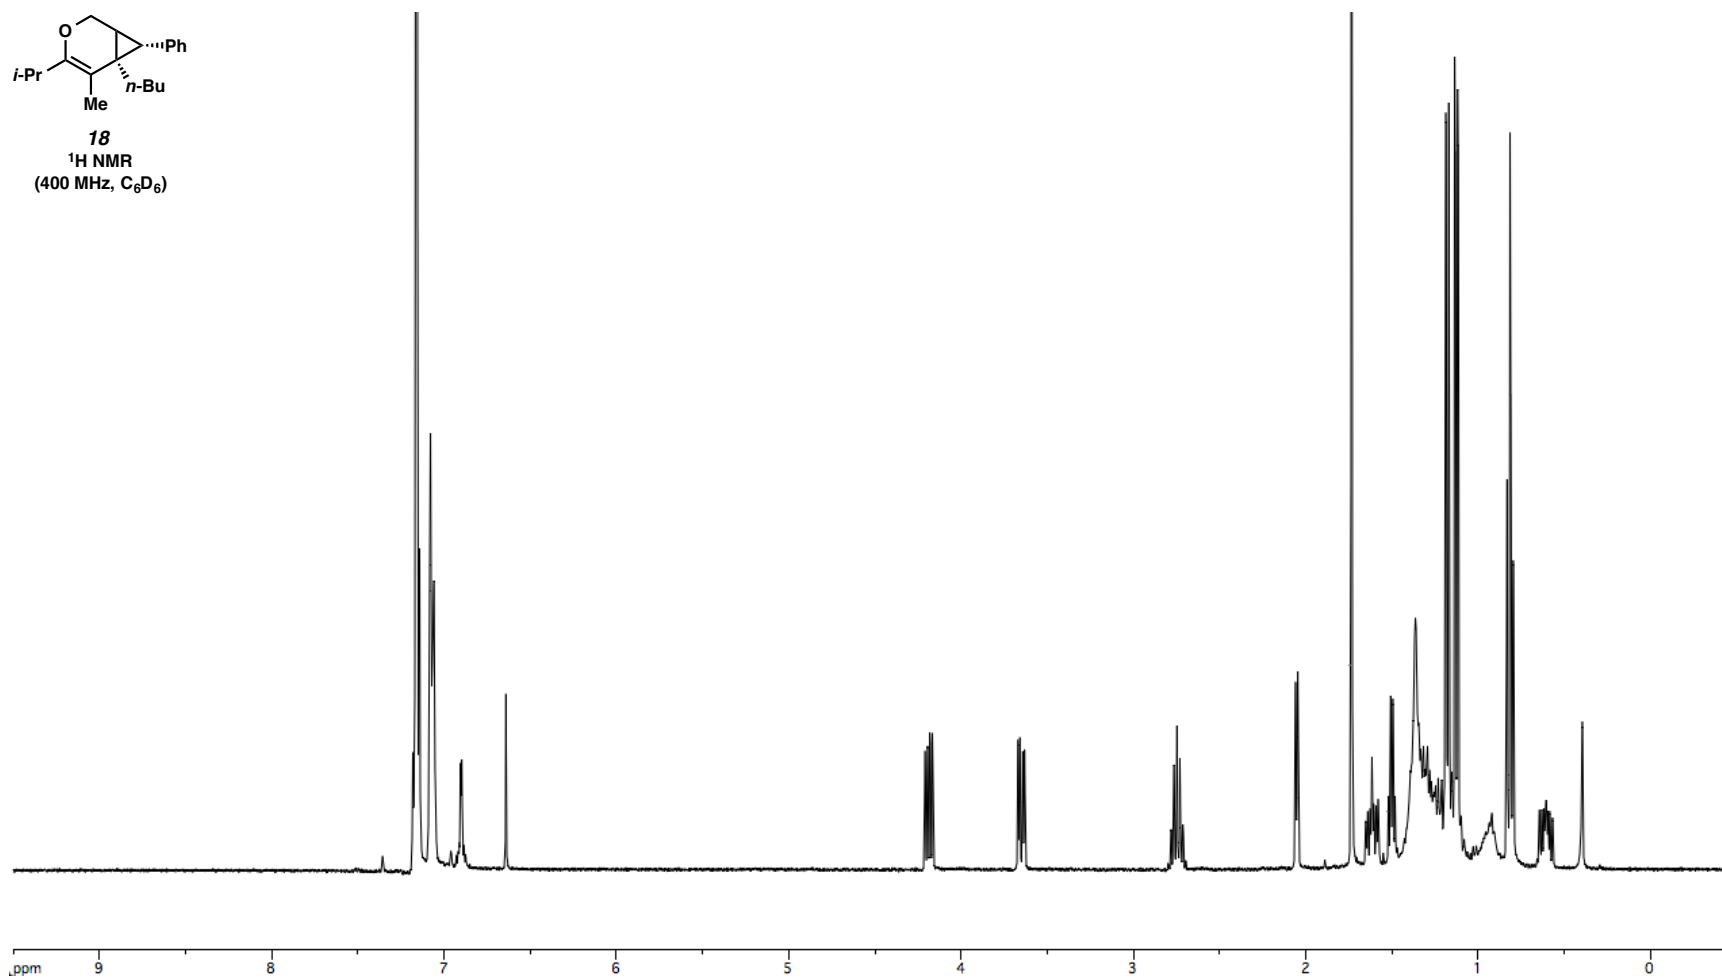



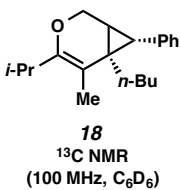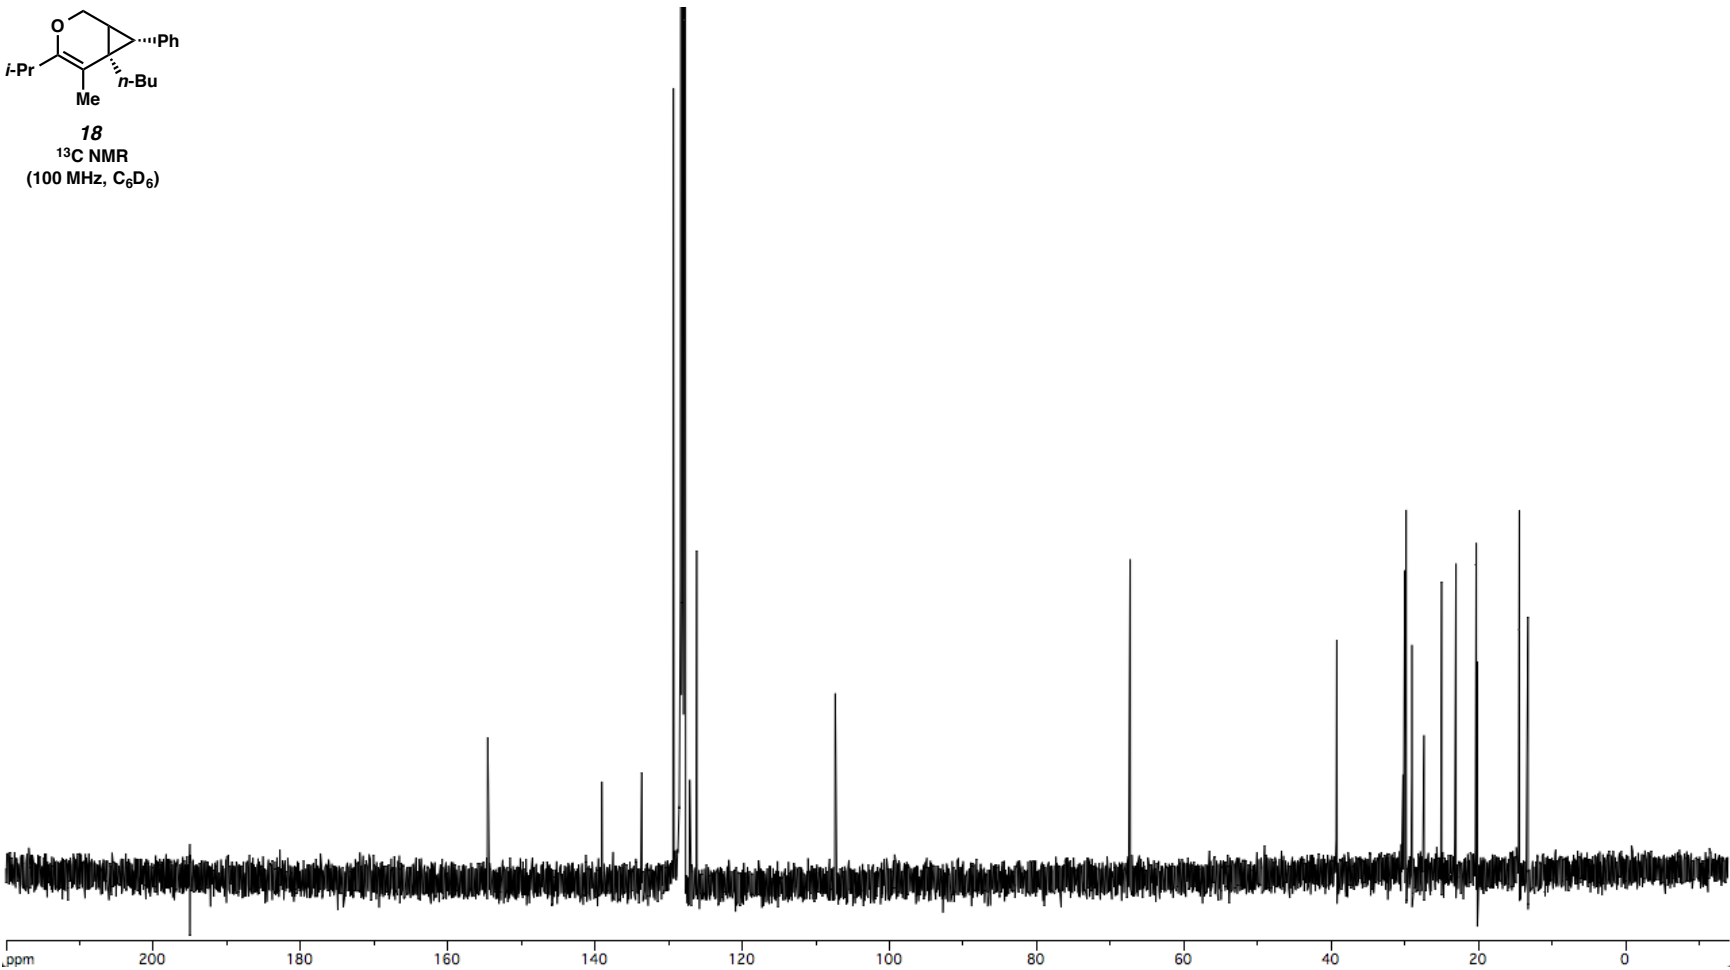

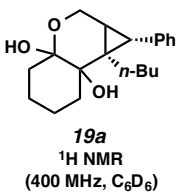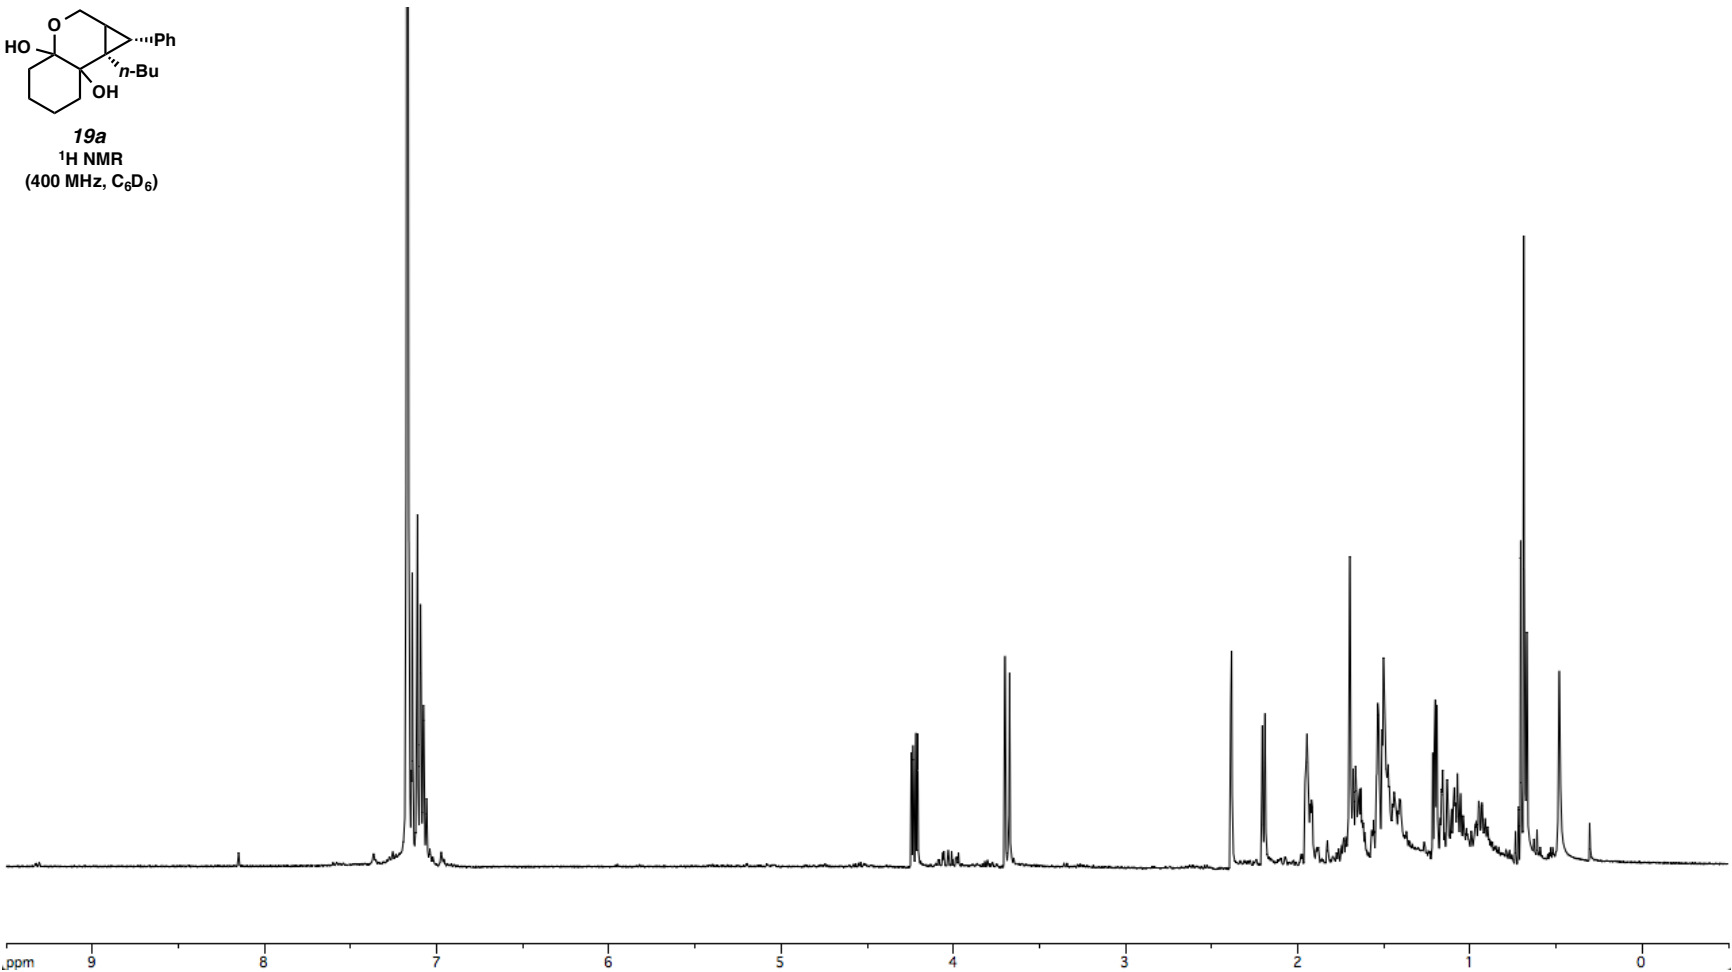

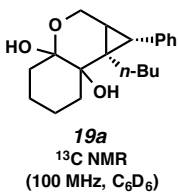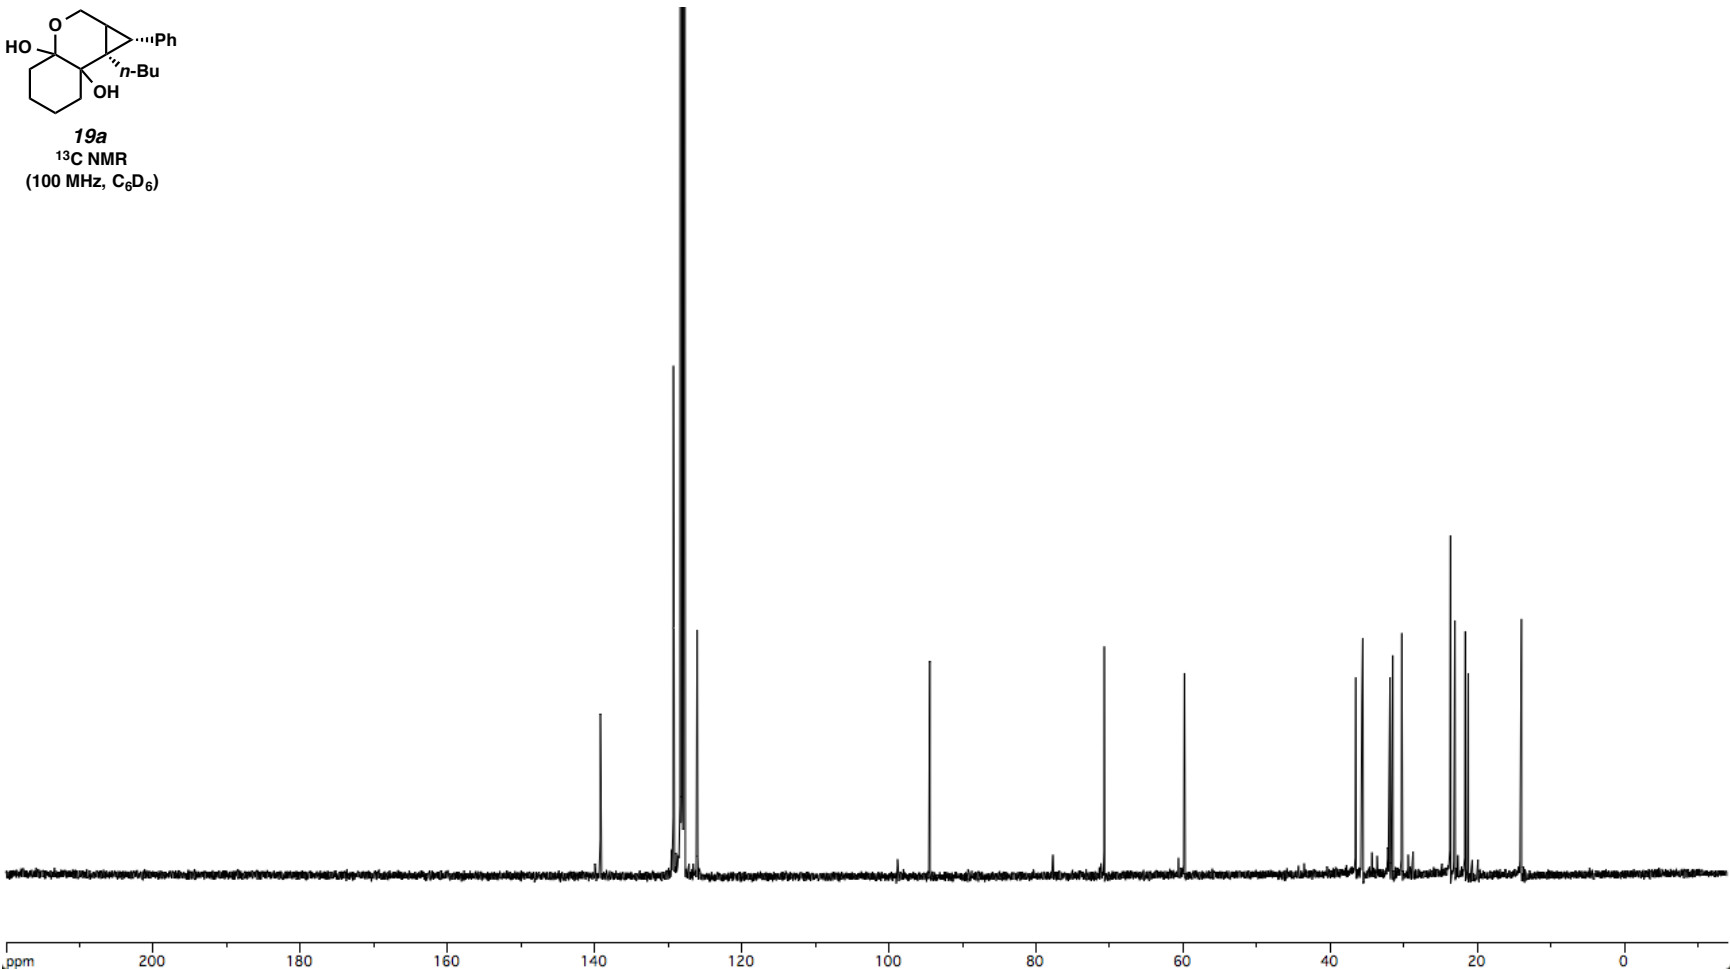

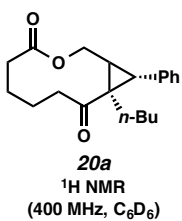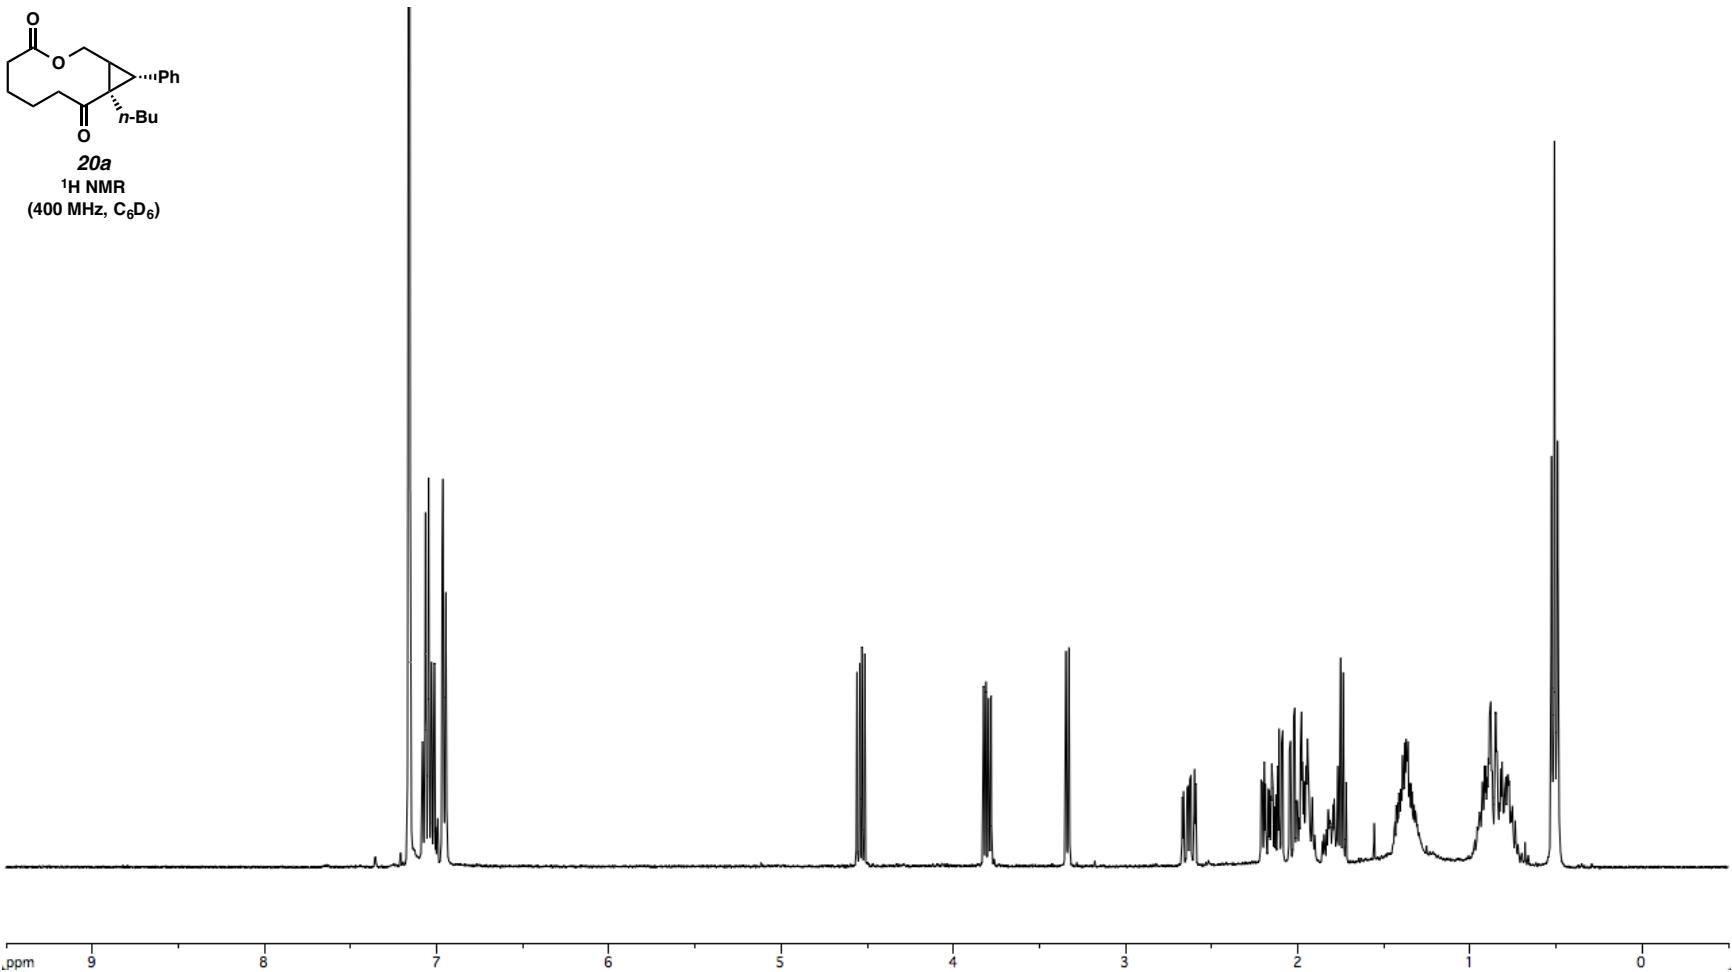

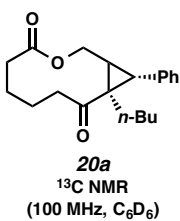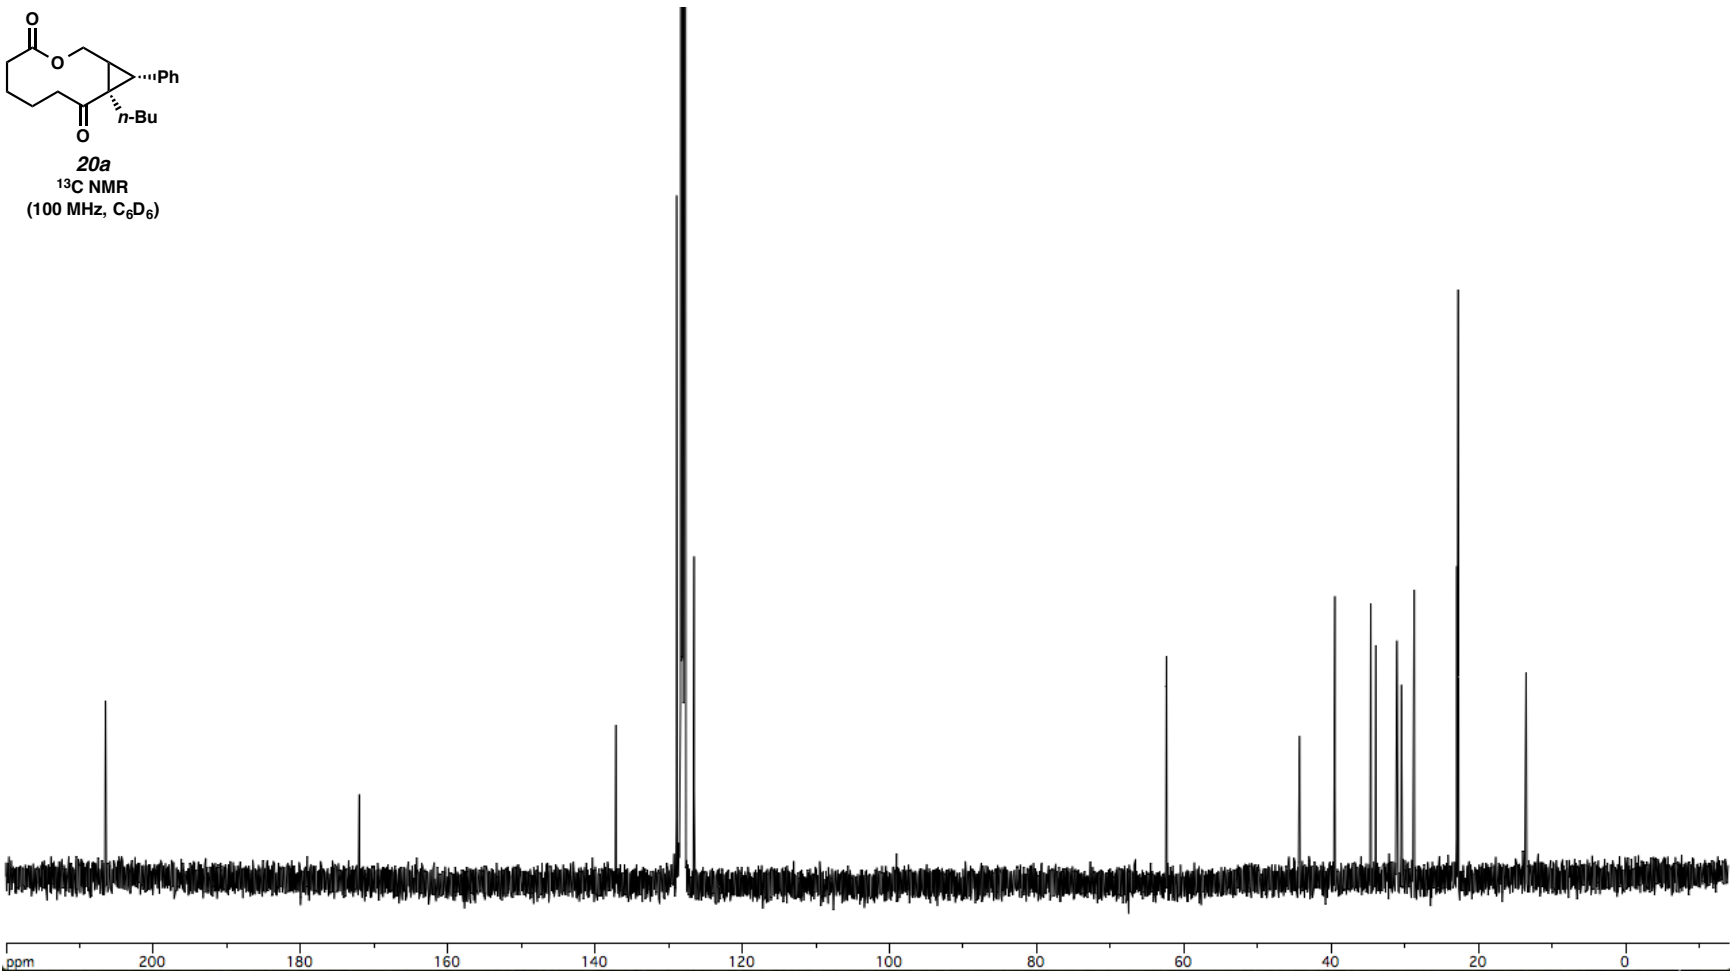

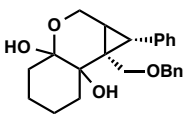

**19i**  
<sup>1</sup>H NMR  
(400 MHz, C<sub>6</sub>D<sub>6</sub>)

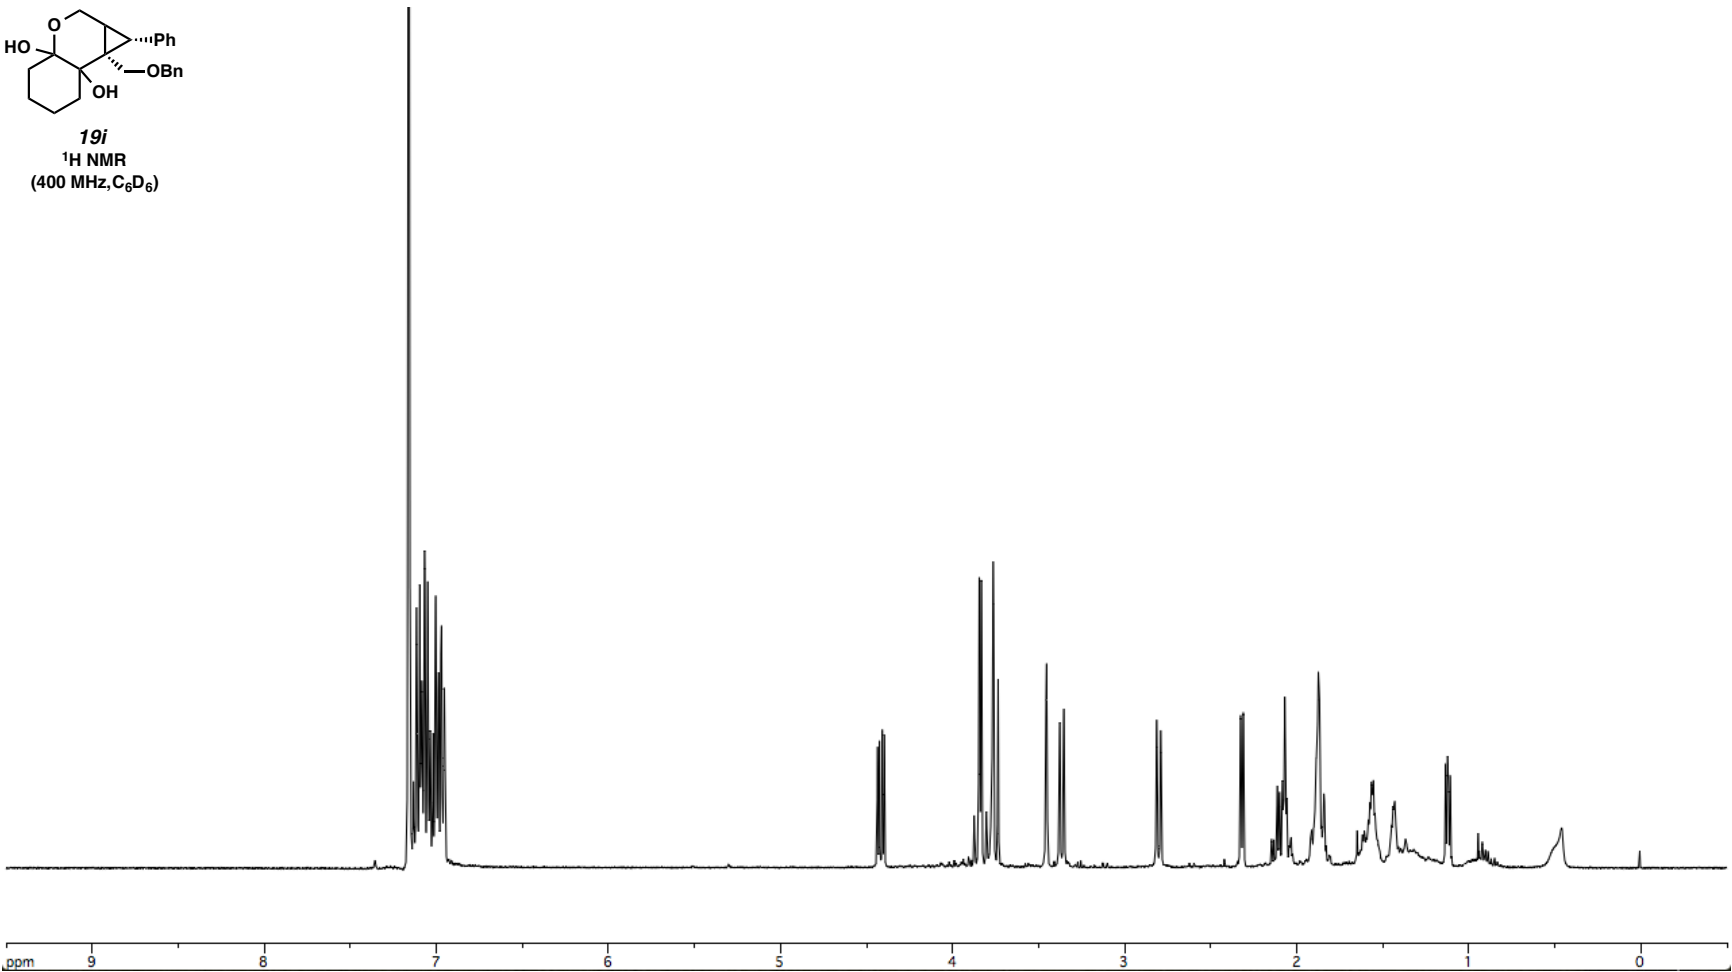

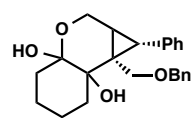

**19i**  
**<sup>13</sup>C NMR**  
**(100 MHz, C<sub>6</sub>D<sub>6</sub>)**

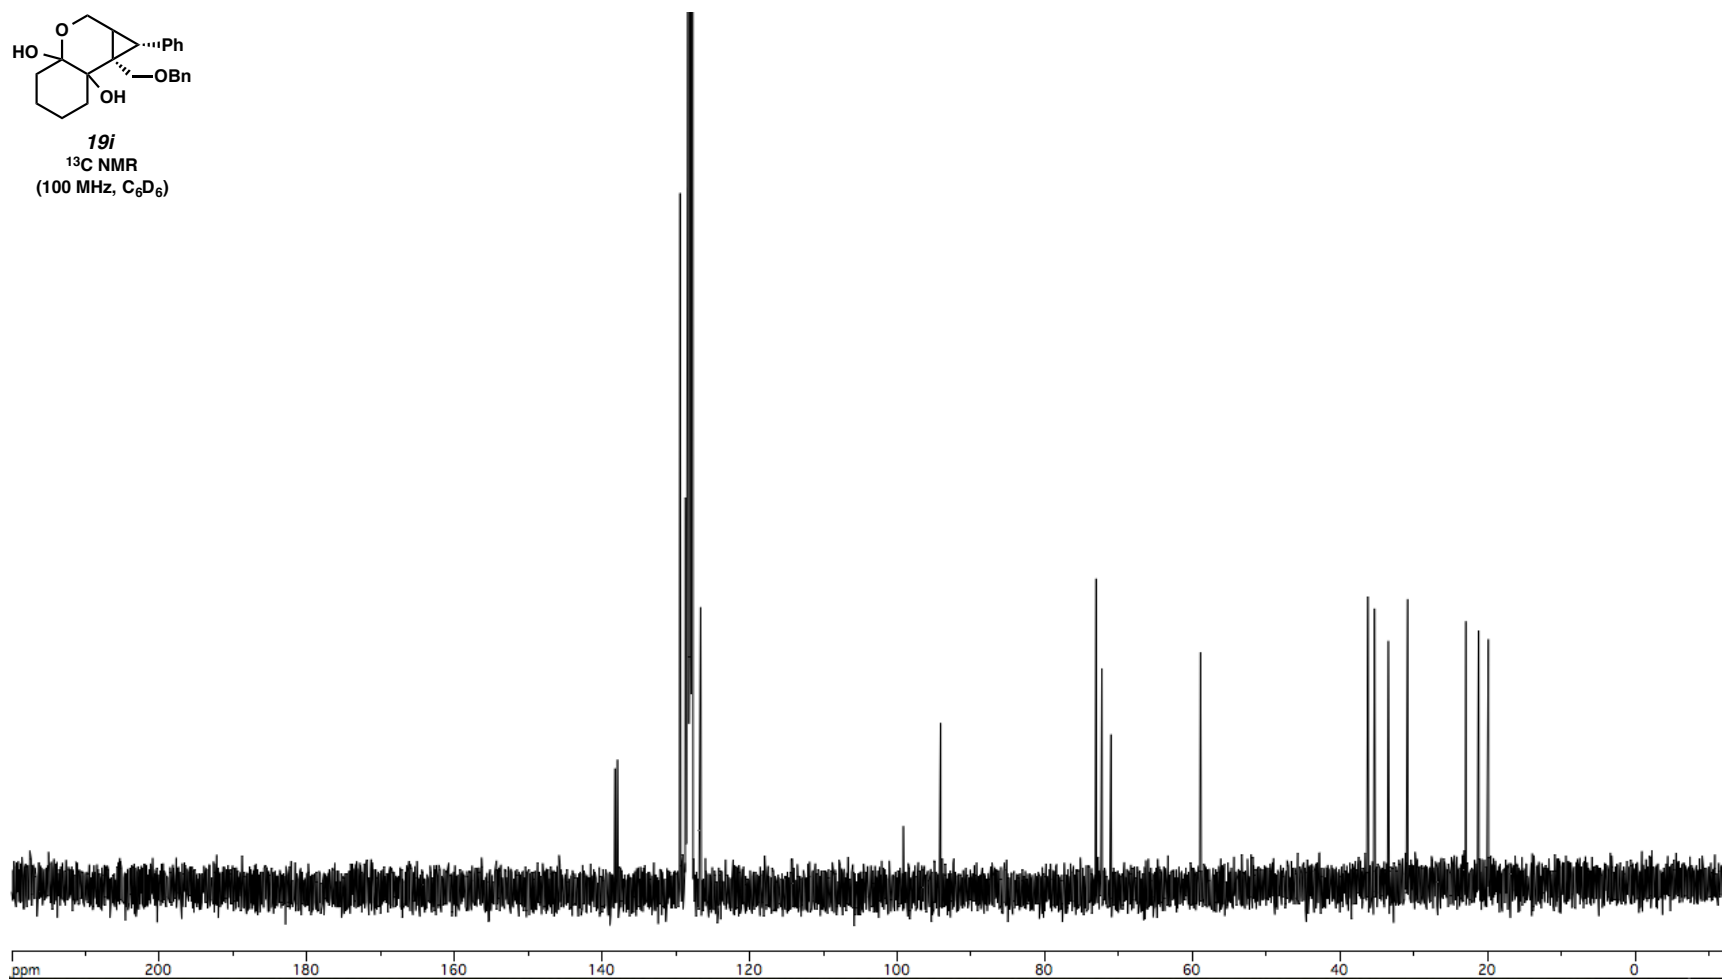

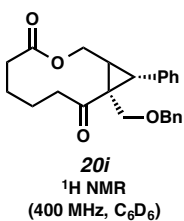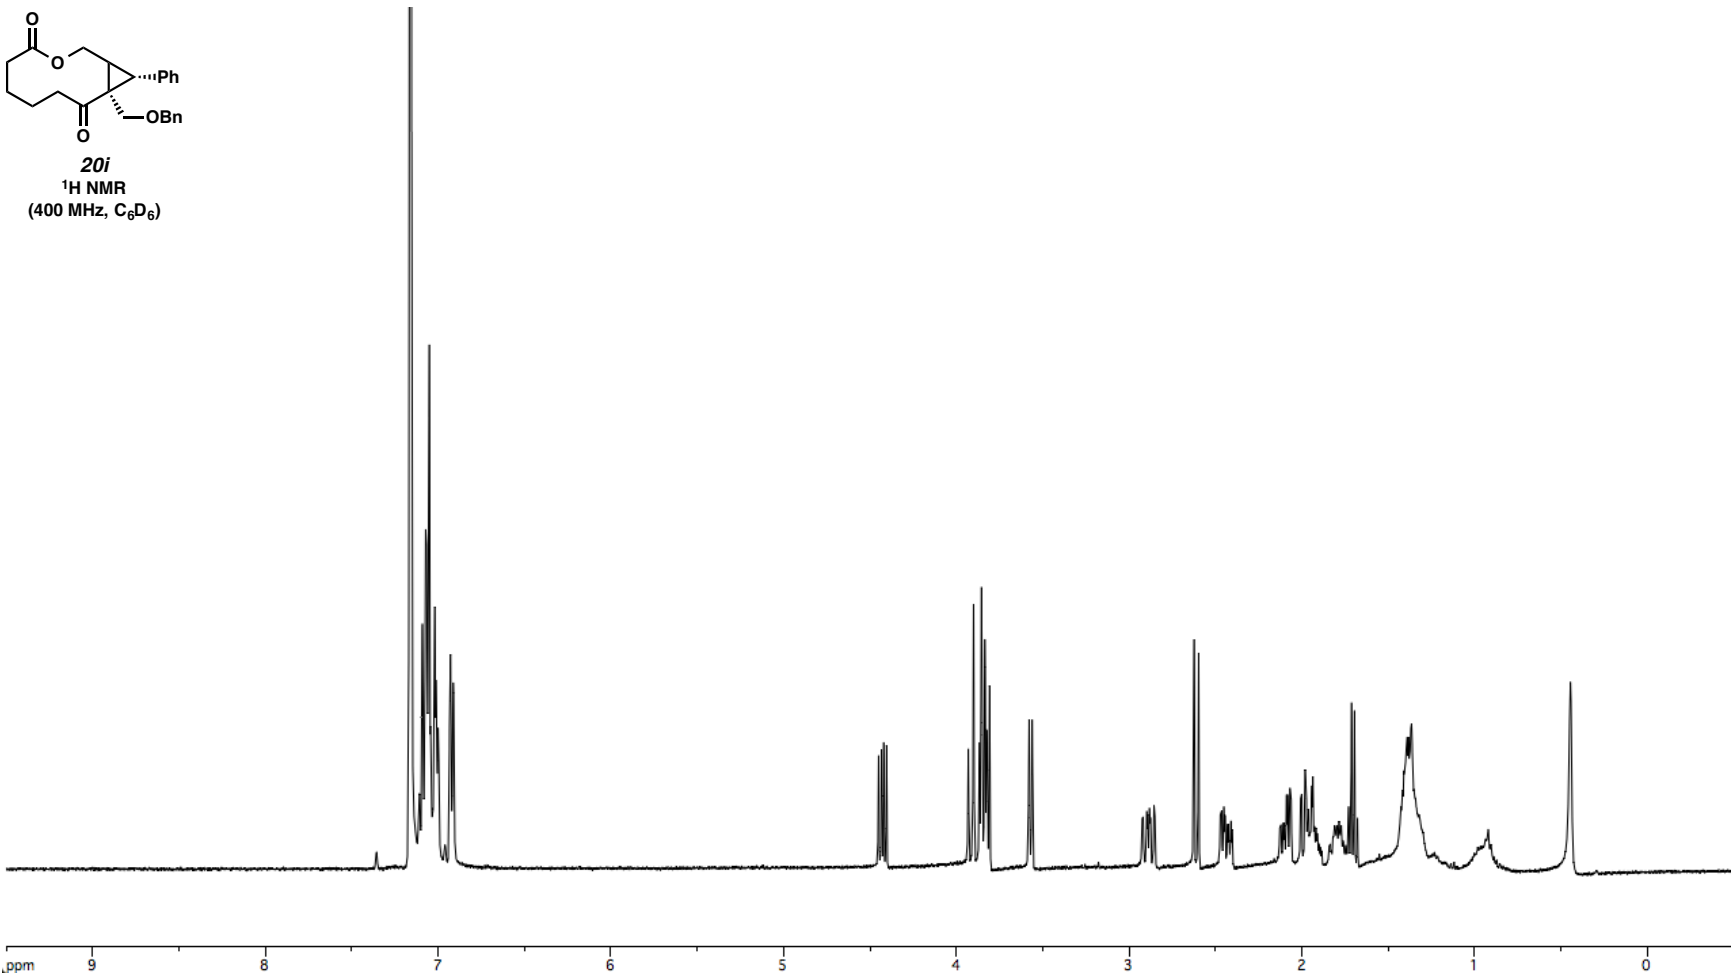



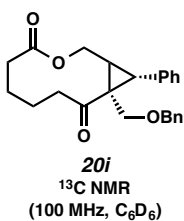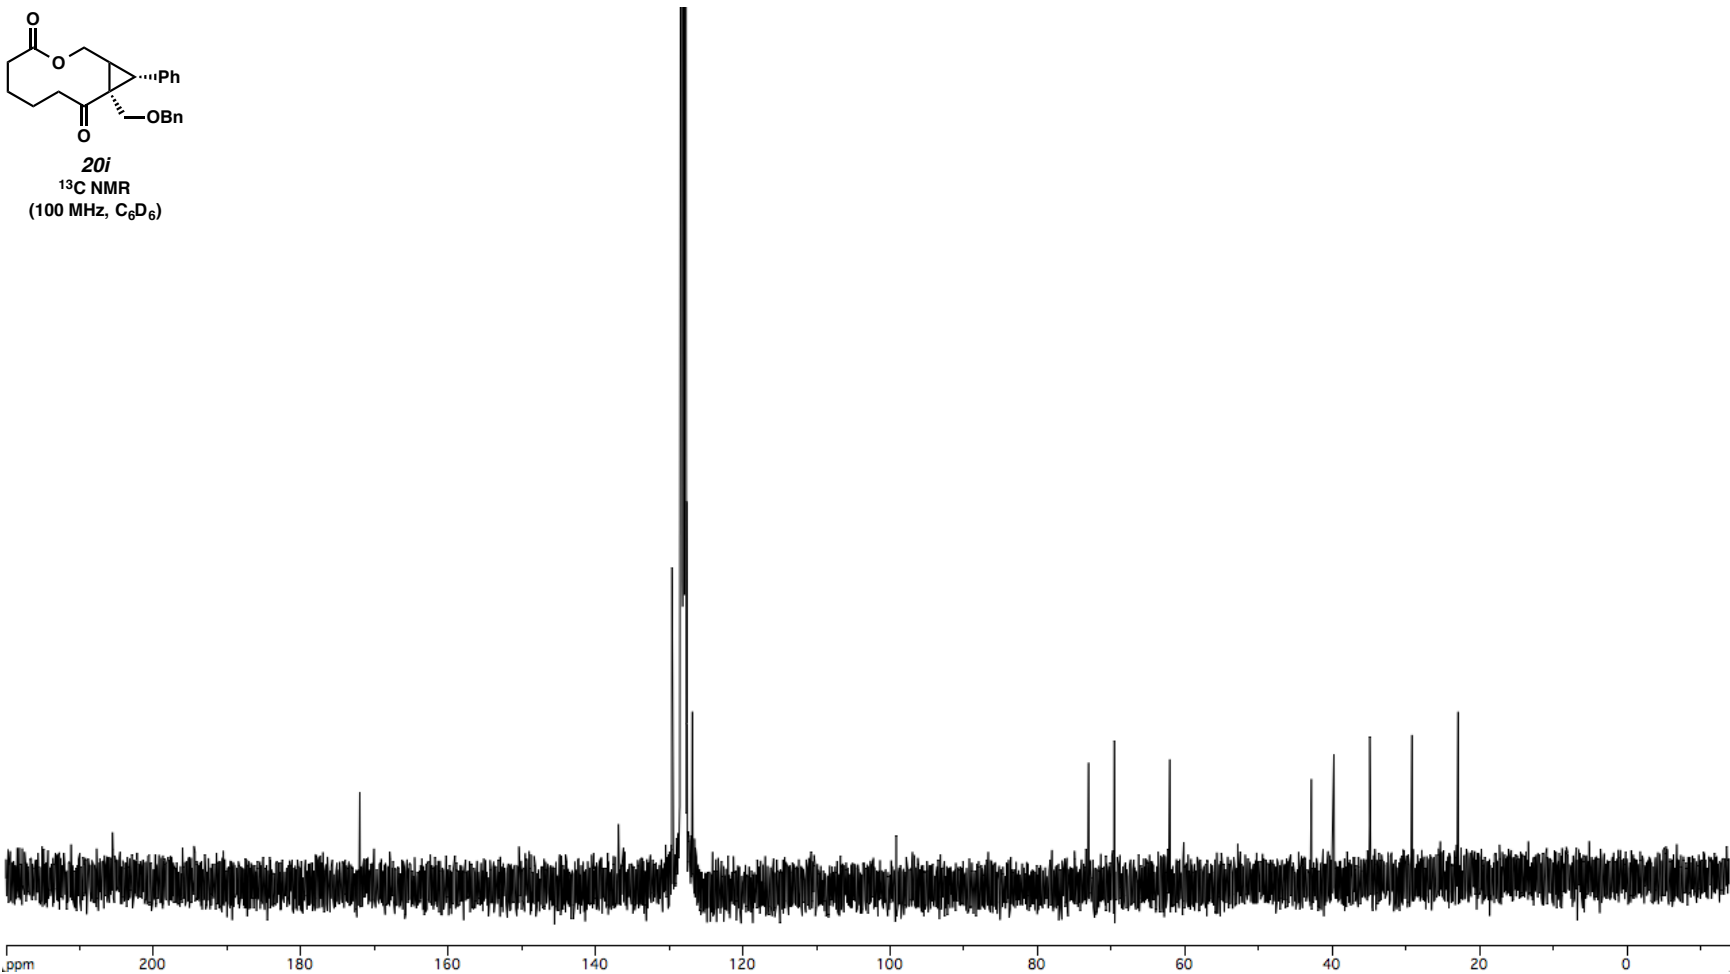

Supplement: c3cc47499b_2.pdf [file c3cc47499b_2.pdf]
